# Supplementary material for: Tuning the melting point of selected ionic liquids through adjustment of the cation's dipole moment
Source: Royal Society of Chemistry journal article supplement (doi:10.1039/d0cp01214a), 2020-01-01
Supplement: d0cp01214a1.pdf [file d0cp01214a1.pdf]

## Tuning the Melting Point of Selected Ionic Liquids Through Adjustment of the Cation's Dipole Moment

### General Information:

Commercial reagents were obtained from Aldrich Chemical and Oakwood Chemicals and used without further purification.  $^1\text{H}$ ,  $^{19}\text{F}$ ,  $^{31}\text{P}$  and  $^{13}\text{C}$  NMR was recorded on a 500 MHz JEOL spectrometer using  $\text{CDCl}_3$  as a solvent at room temperature.

### General Procedure for the Synthesis of Fluorophenyltriphenyl Phosphonium $[\text{NTf}_2]^-$ ILs

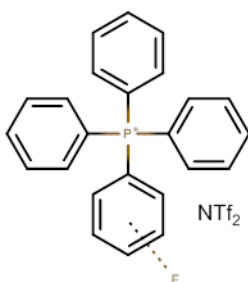

In a 50 ml heavy wall pressure vessels with an internal thread containing steering bar, Fluoro-iodobenzene (1.0 equiv), triphenyl phosphine (1.0 equiv),  $\text{Pd}(\text{OAc})_2$  (1.5 mol%) and Xylene (15 ml) were added under nitrogen atmosphere and the reaction mixture stirred at  $140^\circ\text{C}$  for 2 hours. The reaction mixture was then cooled down to the room temperature and filtered to yield pure fluorophenyltriphenyl phosphonium iodide as a pale-white solid. The  $[\text{NTf}_2]^-$  salt was obtained by anion exchange of  $\text{KNTf}_2$  (1.0 equiv) and phosphonium

salt (1.0 equiv) in water for 15 min at room temperature. The reaction mixture was then extracted three times with DCM and brine solution. The combined organic extracts were dried over anhydrous  $\text{Na}_2\text{SO}_4$  and solvents were removed under reduced pressure to furnish desired fluorophenyltriphenyl phosphonium  $[\text{NTf}_2]^-$  as a white solid.

### General Procedure for the Synthesis of (fluorophenoxy)phenyltriphenylphosphonium $[\text{NTf}_2]^-$ ILs

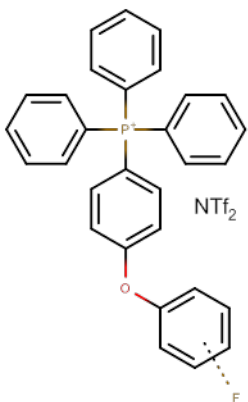

First 3-(fluorophenoxy)bromobenzene was prepared using following method: In a 100 ml heavy wall pressure vessels with an internal thread containing steering bar, 3-fluorophenylboronic acid (2.0 equiv, 10 g), 4-bromophenol (1.0 equiv), triethylamine (5.0 equiv), Copper(II) acetate (1.0 equiv), and MS  $4\text{\AA}$  (2.0 g) powder and the reaction mixture stirred for 5 hours at room temperature. After the completion of reaction the mixture was filtered through a filter paper and concentrated under reduced pressure. Further purification with column chromatography (Hexane/EtOAc) resulted pure 3-(fluorophenoxy)bromobenzene. Next step, In a 50 ml heavy wall pressure vessels with an internal thread containing steering bar, 3-

(fluorophenoxy)bromobenzene (1.0 equiv), triphenyl phosphine (1.0 equiv),  $\text{NiCl}_2 \cdot 6\text{H}_2\text{O}$  (10 mole%) ethylene glycol (10 ml) were added under nitrogen atmosphere and the reaction mixture stirred at  $160^\circ\text{C}$  for 12 hours. The reaction mixture was then extracted three times with DCM and brine solution and concentrated under reduced pressure to yield pure 3-(fluorophenoxy)phenyltriphenylphosphonium bromide. The  $[\text{NTf}_2]^-$  salt was obtained by anion exchange of  $\text{KNTf}_2$  (1.0 equiv) and phosphonium salt (1.0 equiv) in water for 15 min at room temperature. The reaction mixture was then extracted three times with DCM and brine solution. The combined organic extracts were dried over anhydrous  $\text{Na}_2\text{SO}_4$  and solvents were removed

under reduced pressure to furnish pure 3-(fluorophenoxy)phenyltriphenylphosphonium  $[\text{NTf}_2]^-$  as a white solid. Same procedure was applied for the synthesis of 2-(fluorophenoxy)phenyltriphenylphosphonium  $[\text{NTf}_2]^-$  and 4-(fluorophenoxy)phenyltriphenylphosphonium  $[\text{NTf}_2]^-$ .

#### General Procedure for the Synthesis of triphenylsulfonium $[\text{NTf}_2]^-$ ILs

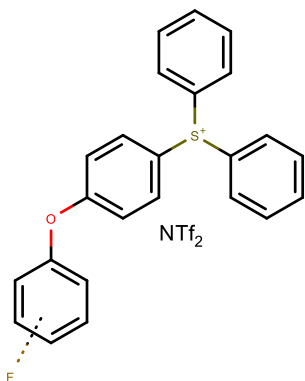

In a 100 ml round bottom flask containing a steering bar, Diphenyl Sulfoxide (1.0 equiv, 5g) and Fluorophenoxy benzene (1.1 equiv) in DCM (50 ml) was stirred for 10 minutes at room temperature. Triflic anhydride solution (1.05 equiv) in DCM was added dropwise to the reaction mixture at room temperature and reaction mixture stirred for overnight at room temperature. After completion of the reaction, solvent was removed under vacuum and washed with ether to remove the unreacted materials to furnish the desired sulfonium product. The  $[\text{NTf}_2]^-$  salt was obtained by anion exchange of excess  $\text{KNTf}_2$  (5 equiv) and sulfonium salt (1.0 equiv) in water-methanol for 30 min at

room temperature. The reaction mixture was then extracted three times with DCM and brine solution and the combined organic extracts were dried over anhydrous  $\text{Na}_2\text{SO}_4$ . Then solvents were removed under reduced pressure to result desired triphenylsulfonium  $[\text{NTf}_2]^-$ .

#### Synthesis of tris(3-fluorophenyl)(phenyl)phosphonium $[\text{NTf}_2]^-$ IL

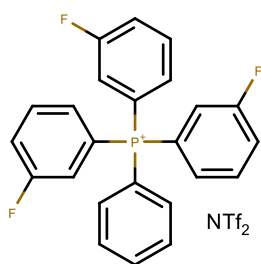

In a 50 ml heavy wall pressure vessels with an internal thread containing steering bar, Bromobenzene (1.0 equiv), Tris(3-fluorophenyl)phosphine (1.0 equiv),  $\text{NiCl}_2 \cdot 6\text{H}_2\text{O}$  (10 mole%) ethylene glycol (10 ml) were added under nitrogen atmosphere and the reaction mixture stirred at 180 °C for 15 hours. The reaction mixture was then cooled down to the room temperature and was extracted three times with DCM / brine solution and concentrated under reduced pressure to

yield tris(3-fluorophenyl)(phenyl)phosphonium bromide. The  $[\text{NTf}_2]^-$  salt was obtained by anion exchange of  $\text{KNTf}_2$  (1.0 equiv) and phosphonium salt (1.0 equiv) in water for 15 min at room temperature. The reaction mixture was then extracted three times with DCM and brine solution. The combined organic extracts were dried over anhydrous  $\text{Na}_2\text{SO}_4$  and solvents were removed under reduced pressure to furnish pure of tris(3-fluorophenyl)(phenyl)phosphonium  $[\text{NTf}_2]^-$ .

Same method was applied for the synthesis of tris(4-fluorophenyl)(phenyl)phosphonium  $[\text{NTf}_2]^-$ .

#### Synthesis of 3-benzyl-1-methyl-imidazolium $[\text{NTf}_2]^-$ ILs

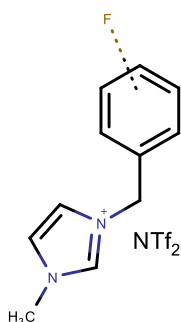

In a 100 ml round bottom flask containing a steering bar, 1-methylimidazol (1.0 equiv, 5g) and Benzyl Bromide (1.0 equiv) in THF (50 ml) was stirred for overnight at 40 °C. Then the reaction mixture was filtered and white solid yielded as a pure product. Anion exchange with  $\text{KNTf}_2$  (1.0 equiv) carried out in water and stirred for 30 min at room temperature. The reaction mixture was then extracted three times with DCM and brine solution and the combined organic extracts were dried

over anhydrous  $\text{Na}_2\text{SO}_4$ . Then solvents were removed under reduced pressure to produce pure 3-benzyl-1-methyl-imidazolium  $[\text{NTf}_2]^-$  as a colorless liquid.

### 1,1-dimethyl-4-phenylpiperidinium $[\text{NTf}_2]^-$ ILs

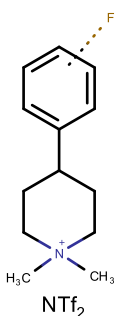

For the synthesis of 1,1-dimethyl-4-phenylpiperidinium  $[\text{NTf}_2]^-$ , first 1,1-dimethyl-4-phenylpiperidinium iodide salt was prepared using following method. In a 100 ml round bottom flask containing a stirring bar, 4-phenylpiperidine (1.0 equiv, 2 g), iodomethane (5.0 equiv), and potassium bicarbonate (1.5 equiv) in methanol (50 ml) was stirred for 24 hours at room temperature. Then solvent was removed under vacuum and the mixture was dissolved in DCM and filtered through filter paper. Filtrate was concentrated under reduced pressure and pure product was obtained in high yield. Anion exchange with  $\text{KNTf}_2$  in water furnished 1,1-dimethyl-4-phenylpiperidinium  $[\text{NTf}_2]^-$ . The reaction mixture was then extracted with DCM and the combined organic extracts were dried over anhydrous  $\text{Na}_2\text{SO}_4$ . Then solvents were removed under reduced pressure to produce pure 1,1-dimethyl-4-phenylpiperidinium  $[\text{NTf}_2]^-$  as a white solid.

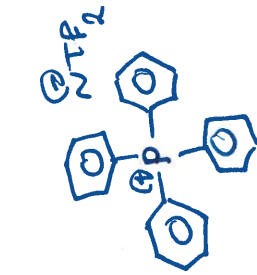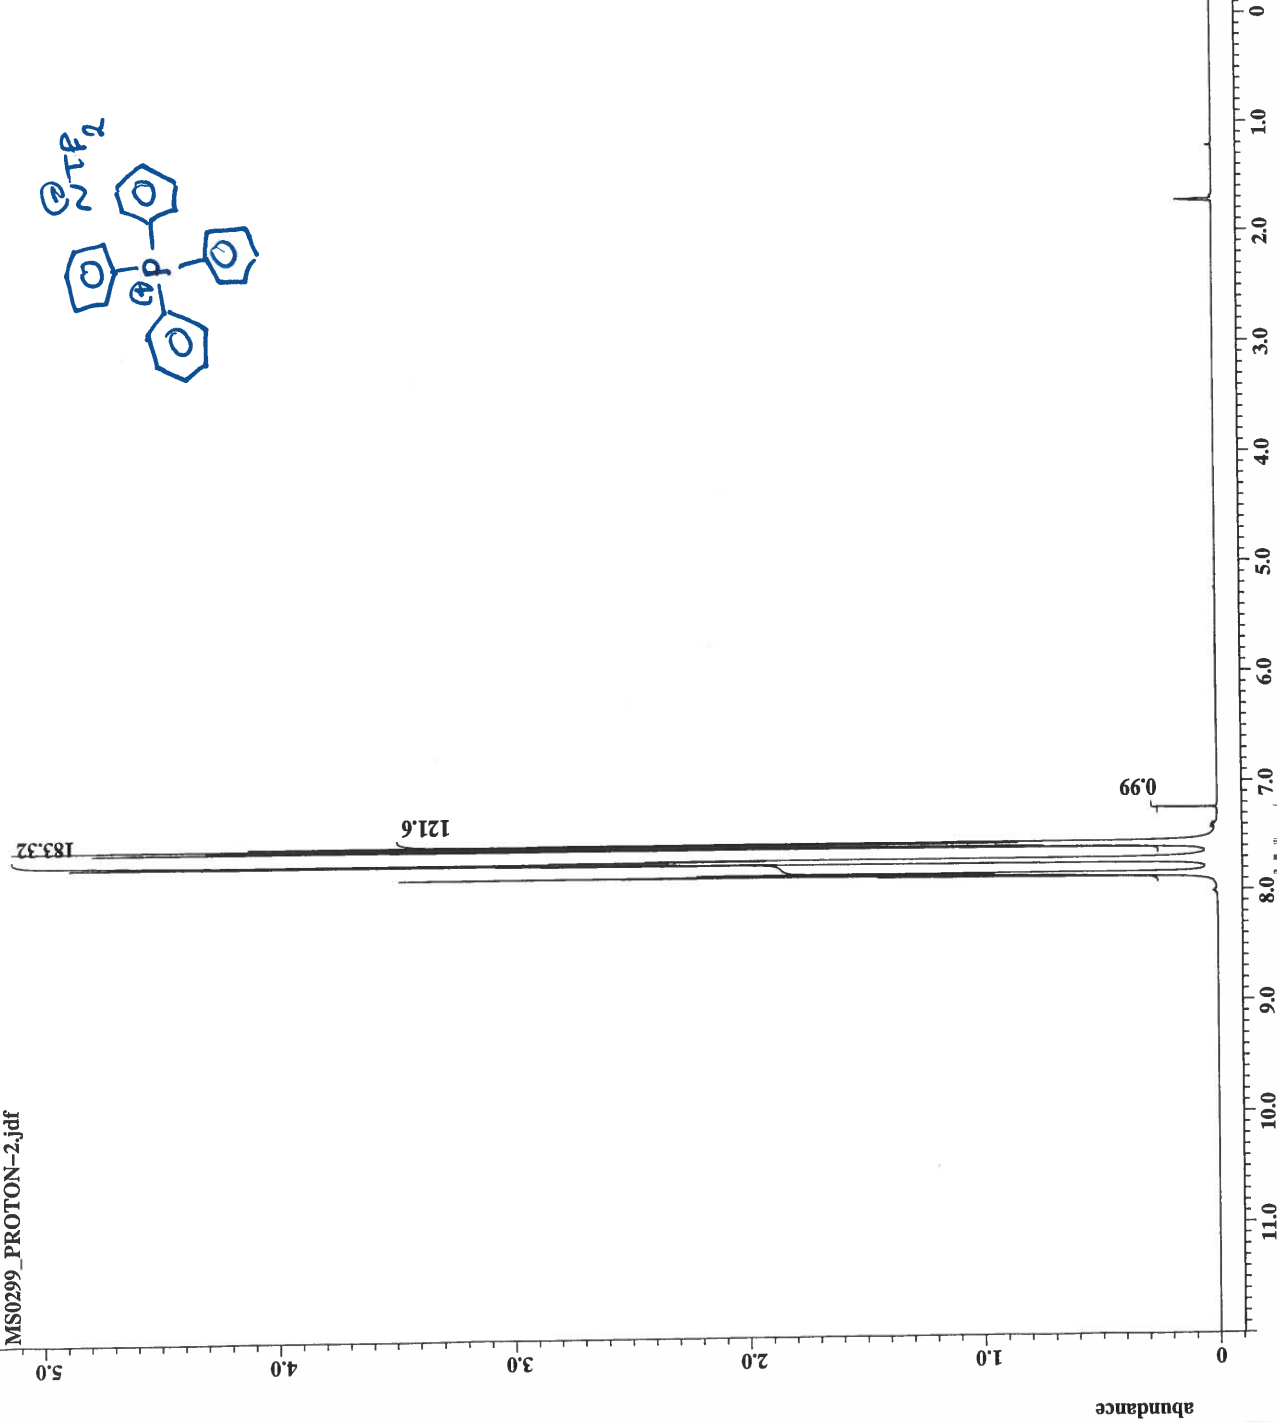

X : parts per Million : 1H

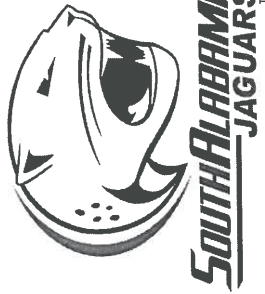

Filename = MS0299\_PROTON-2.jdf  
 Author = Jim Davis  
 Experiment = single\_pulse.ex2  
 Sample\_id = MS0299  
 Solvent = CHLOROFORM-D  
 Changer\_sample = 7  
 Creation\_time = 9-JUN-2018 18:05:00  
 Revision\_time = 9-JUN-2018 17:38:47  
 Current\_time = 9-JUN-2018 17:38:47  
 Data\_format = 1D COMPLEX  
 Dim\_size = 13107  
 Dim\_title = 1H  
 Dim\_units [ppm]  
 Dimensions = X  
 Site = ECA 500  
 Spectrometer = JNM-ECA500  
 Field\_strength = 11.7473579[T] (500[MH  
 X\_acq\_duration = 1.74587904[s]  
 X\_domain = 1H  
 X\_freq = 500.15991521[MHz]  
 X\_offset = 5.0[ppm]  
 X\_points = 16384  
 X\_prescans = 1  
 X\_resolution = 0.57277737[Hz]  
 X\_sweep = 9.38438438[MHz]  
 Irr\_domain = 1H  
 Irr\_freq = 500.15991521[MHz]  
 Irr\_offset = 5.0[ppm]  
 Tri\_domain = 1H  
 Tri\_freq = 500.15991521[MHz]  
 Tri\_offset = 5.0[ppm]  
 Clipped = FALSE  
 Mod\_return = 1  
 Scans = 16  
 Total\_scans = 16  
 X\_90\_width = 12.4[us]  
 X\_acq\_time = 1.74587904[s]  
 X\_angle = 45[deg]  
 X\_atn = 4[db]  
 X\_pulse = 6.2[us]  
 Irr\_mode = Off  
 Tri\_mode = Off  
 Dante\_presat = FALSE  
 Initial\_wait = 1[s]  
 Recvr\_gain = 28  
 Relaxation\_delay = 4[s]  
 Repetition\_time = 5.74587904[s]  
 Temp\_get = 21.1[dc]



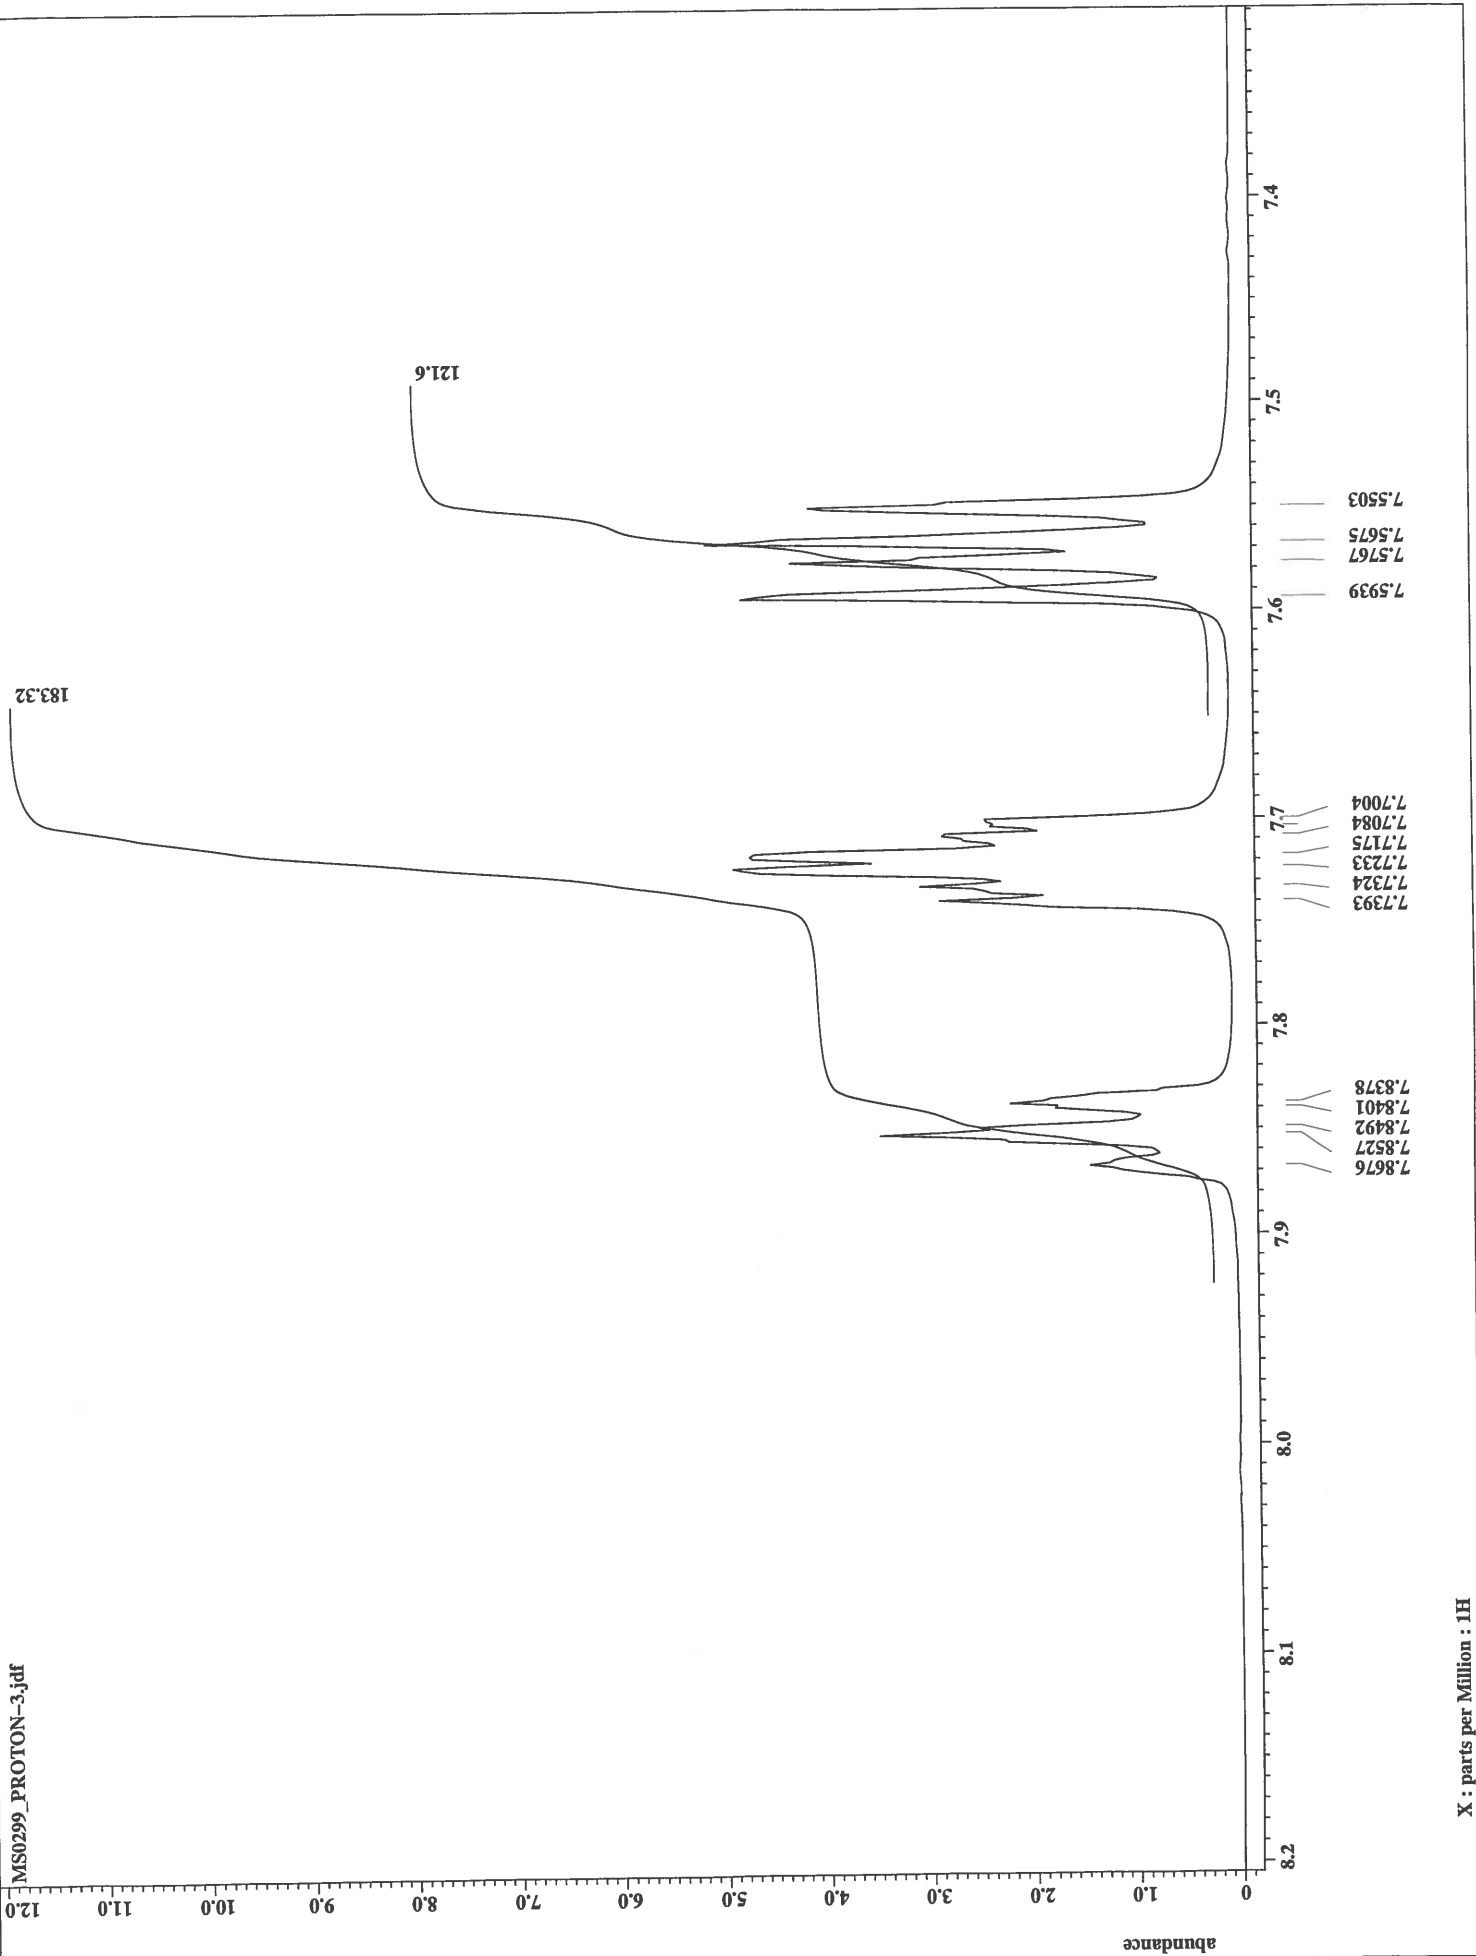

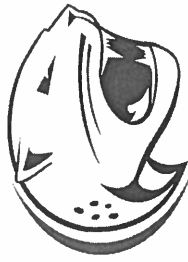

**SOUTH ALABAMA**  
**JAGUARS**

```

Filename      = MS0299_CARBON-2.jdf
Author       = Jim Davis
Experiment   = single_pulse_dec
Sample_id    = MS0299
Solvent      = CHLOROFORM-D
Changer_sample
Creation_time 9-JUN-2018 18:19:22
Revision_time 9-JUN-2018 17:53:10
Current_time  9-JUN-2018 17:53:10

Data_format  = 1D COMPLEX
Dim_size     = 26214
Dim_title    = 13C
Dim_units    = [ppm]
Dimensions   = X
Site         = ECA 500
Spectrometer = JNM-ECA500

Field_strength = 11.7473579[T] (500[MH
X_acq_duration = 0.83361792[s]
X_domain       = 13C
X_freq         = 125.76529768[MHz]
X_offset       = 100[ppm]
X_points       = 32768
X_prescans     = 4
X_resolution   = 1.19959034[Hz]
X_sweep        = 39.3081761[KHz]
Irr_domain     = 1H
Irr_freq       = 500.15991521[MHz]
Irr_offset     = 5.0[ppm]
Clipped        = FALSE
Mod_return     = 1
Scans          = 256
Total_scans    = 256

X_90_width     = 13.2[us]
X_acq_time     = 0.83361792[s]
X_angle        = 30[deg]
X_atn          = 6[db]
X_pulse        = 4.4[us]
Irr_atn_dec    = 20.7[db]
Irr_atn_noe    = 20.7[db]
Irr_noise      = WALTZ
Decoupling     = TRUE
Initial_wait   = 1[s]
Noe            = TRUE
Noe_time       = 2[s]
Recvr_gain     = 60
Relaxation_delay = 2[s]
Repetition_time = 2.83361792[s]
Temp_get       = 21.7[dc]
  
```

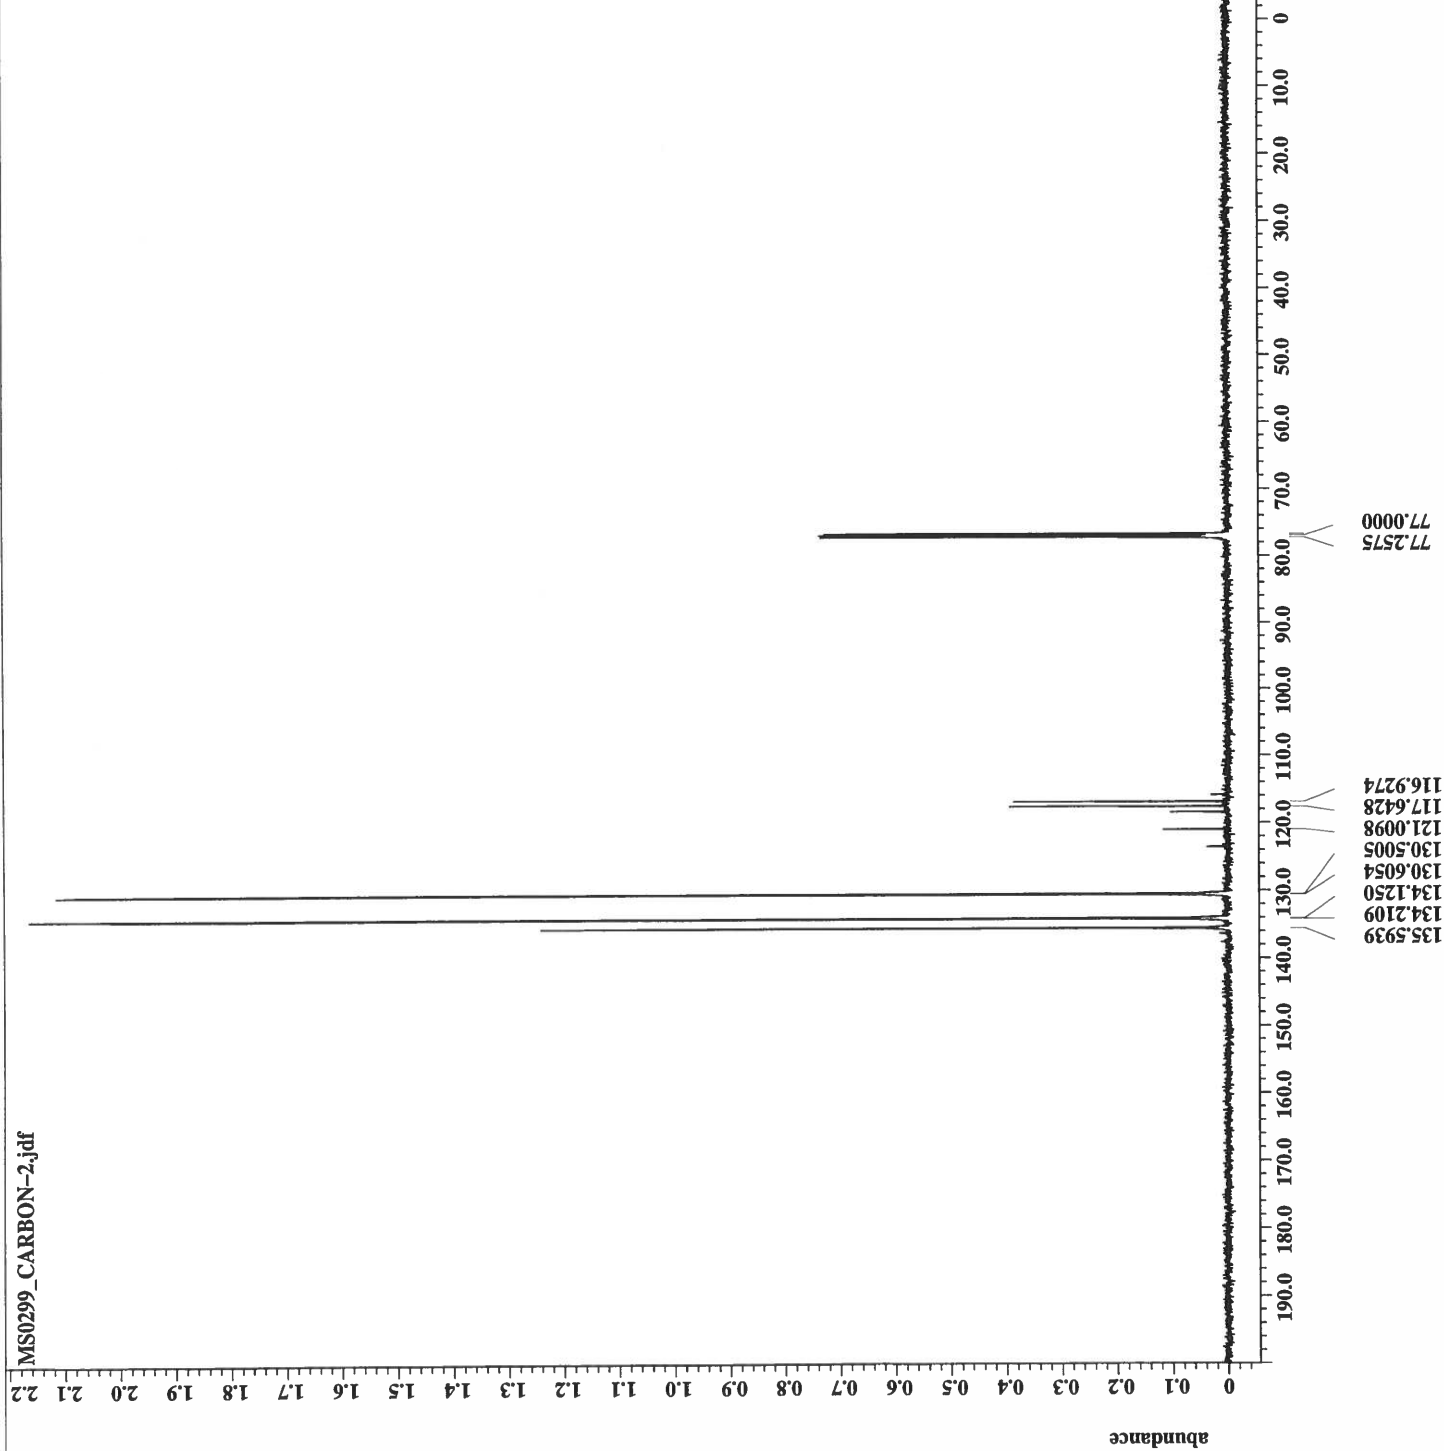

X : parts per Million : 13C

3.0

2.0

1.0

abundance

138.0 137.0 136.0 135.0 134.0 133.0 132.0 131.0 130.0 129.0 128.0 127.0 126.0 125.0 124.0 123.0 122.0 121.0 120.0 119.0 118.0 117.0 116.0 115.0 114.0

115.8877

116.9274

117.6428

118.4536

121.0098

123.5661

130.5005

130.6054

134.1250

134.2109

135.5939

X : parts per Million : 13C

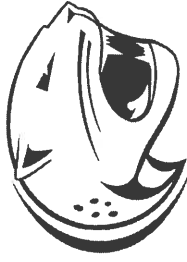

**SOUTH ALABAMA**  
JAGUARS™

```

Filename      = MS0299_FLUORINE-2.jdf
Author       = Jim Davis
Experiment    = single_pulse.ex2
Sample_id    = MS0299
Solvent      = CHLOROFORM-D
Changer_sample_id = 7
Creation_time = 9-JUN-2018 18:22:19
Revision_time = 9-JUN-2018 17:56:06
Current_time  = 9-JUN-2018 17:56:06

Data_format  = 1D COMPLEX
Dim_size     = 52428
Dim_title    = 19F
Dim_units    = [ppm]
Dimensions   = X
Site         = ECA 500
Spectrometer = JNM-ECA500

Field_strength = 11.7473579 [T] (500 [MH
X_acq_duration = 0.55574528 [s]
X_domain      = 19F
X_freq        = 470.62046084 [MHz]
X_offset      = -70 [ppm]
X_points      = 65536
X_prescans    = 1
X_resolution  = 1.7993855 [Hz]
X_sweep       = 117.9245283 [kHz]
Irr_domain    = 19F
Irr_freq      = 470.62046084 [MHz]
Irr_offset    = 5 [ppm]
Tri_domain    = 19F
Tri_freq      = 470.62046084 [MHz]
Tri_offset    = 5 [ppm]
Clipped       = FALSE
Mod_return    = 1
Scans         = 16
Total_scans   = 16

X_90_width    = 13.1 [us]
X_acq_time    = 0.55574528 [s]
X_angle       = 45 [deg]
X_atn         = 2.5 [dB]
X_pulse       = 6.55 [us]
Irr_pulse     = Off
Irr_mode      = Off
Dante_preset  = FALSE
Initial_wait  = 1 [s]
Recvr_gain    = 38
Relaxation_delay = 4 [s]
Repetition_time = 4.55574528 [s]
Temp_get      = 21.4 [dC]
  
```

-78.6295

X : parts per Million : 19F

abundance

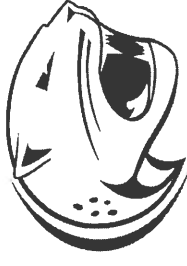**SOUTH ALABAMA**  
**JAGUARS**™

Filename = MS0299\_PHOSPHORUS-2.j  
Author = Jim Davis  
Experiment = single\_pulse\_dec  
Sample\_id = MS0299  
Solvent = CHLOROFORM-D  
Charger\_sample = 7  
Creation\_time = 9-JUN-2018 18:25:53  
Revision\_time = 9-JUN-2018 17:59:40  
Current\_time = 9-JUN-2018 17:59:40  
Data\_format = 1D COMPLEX  
Dim\_size = 26214  
Dim\_title = 31P  
Dim\_units = [ppm]  
Dimensions = X  
Site = ECA 500  
Spectrometer = JNM-ECA500  
Field\_strength = 11.7473579[T] (500[MH  
X\_acq\_duration = 0.64487424[s]  
X\_domain = 31P  
X\_freq = 202.46831075[MHz]  
X\_offset = 0[ppm]  
X\_points = 32768  
X\_prescans = 4  
X\_resolution = 1.55068995[Hz]  
X\_sweep = 50.81300813[MHz]  
Irr\_domain = 1H  
Irr\_freq = 500.15991521[MHz]  
Irr\_offset = 5.0[ppm]  
Clipped = FALSE  
Mod\_return = 1  
Scans = 25  
Total\_scans = 25  
X\_90\_width = 14.687[us]  
X\_acq\_time = 0.64487424[s]  
X\_angle = 30[deg]  
X\_atn = 5[db]  
X\_pulse = 4.89566667[us]  
Irr\_atn\_dec = 20.7[db]  
Irr\_atn\_noe = 20.7[db]  
Irr\_noise = WAITZ  
Decoupling = TRUE  
Initial\_wait = 1[s]  
Noe\_time = TRUE  
Recvr\_gain = 2[is]  
Relaxation\_delay = 56  
Repetition\_time = 2.64487424[s]  
Temp\_get = 21.6[dc]

23.8193

X : parts per Million : 31P

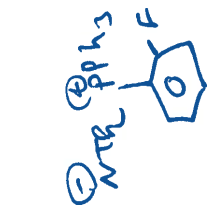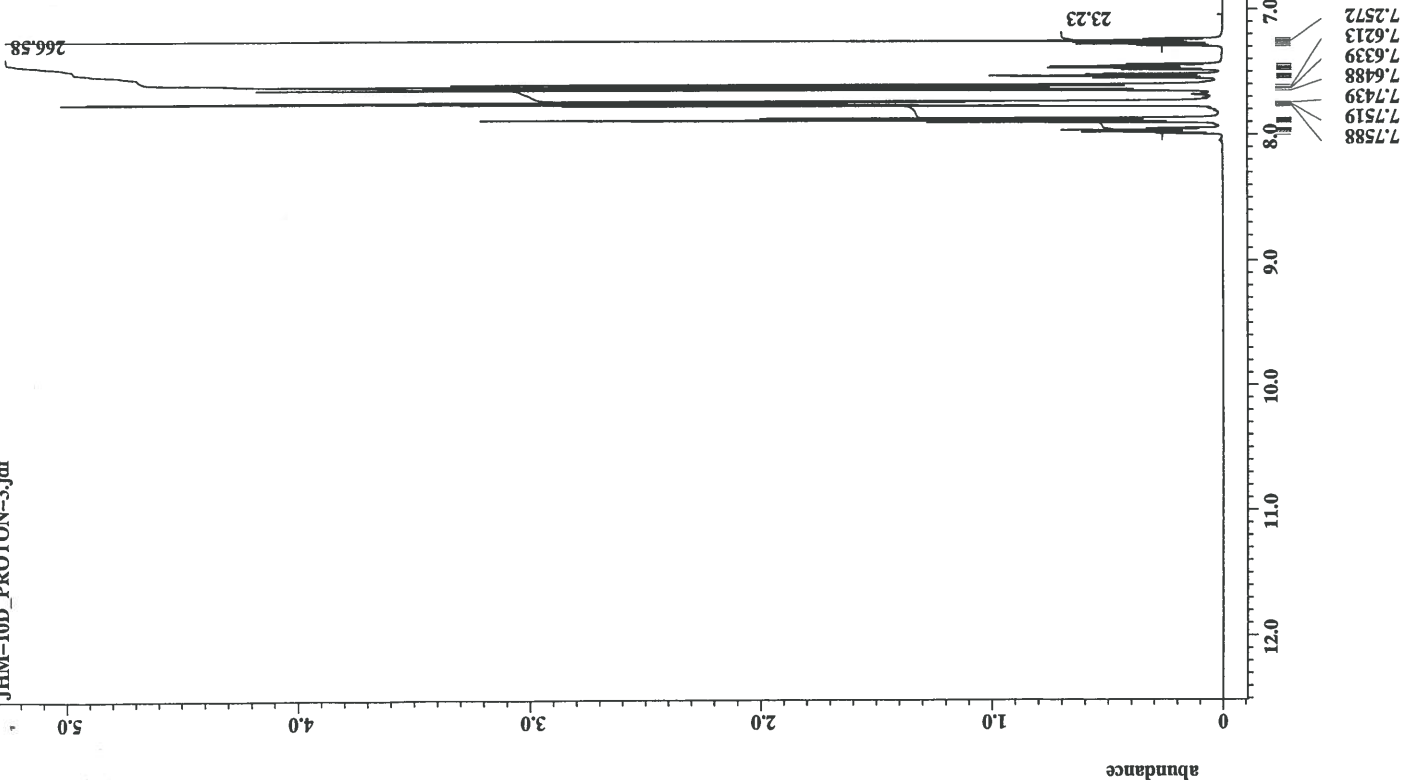

266.58

23.23

abundance

7.9821  
7.9798  
7.9672  
7.8916  
7.8870  
7.8721  
7.7679  
7.7588  
7.7519  
7.7439  
7.6488  
7.6339  
7.6213  
7.5400  
7.5355  
7.5332  
7.5229  
7.4702  
7.4599  
7.2824  
7.2686  
7.2663  
7.2572  
7.2526

X : parts per Million : 1H



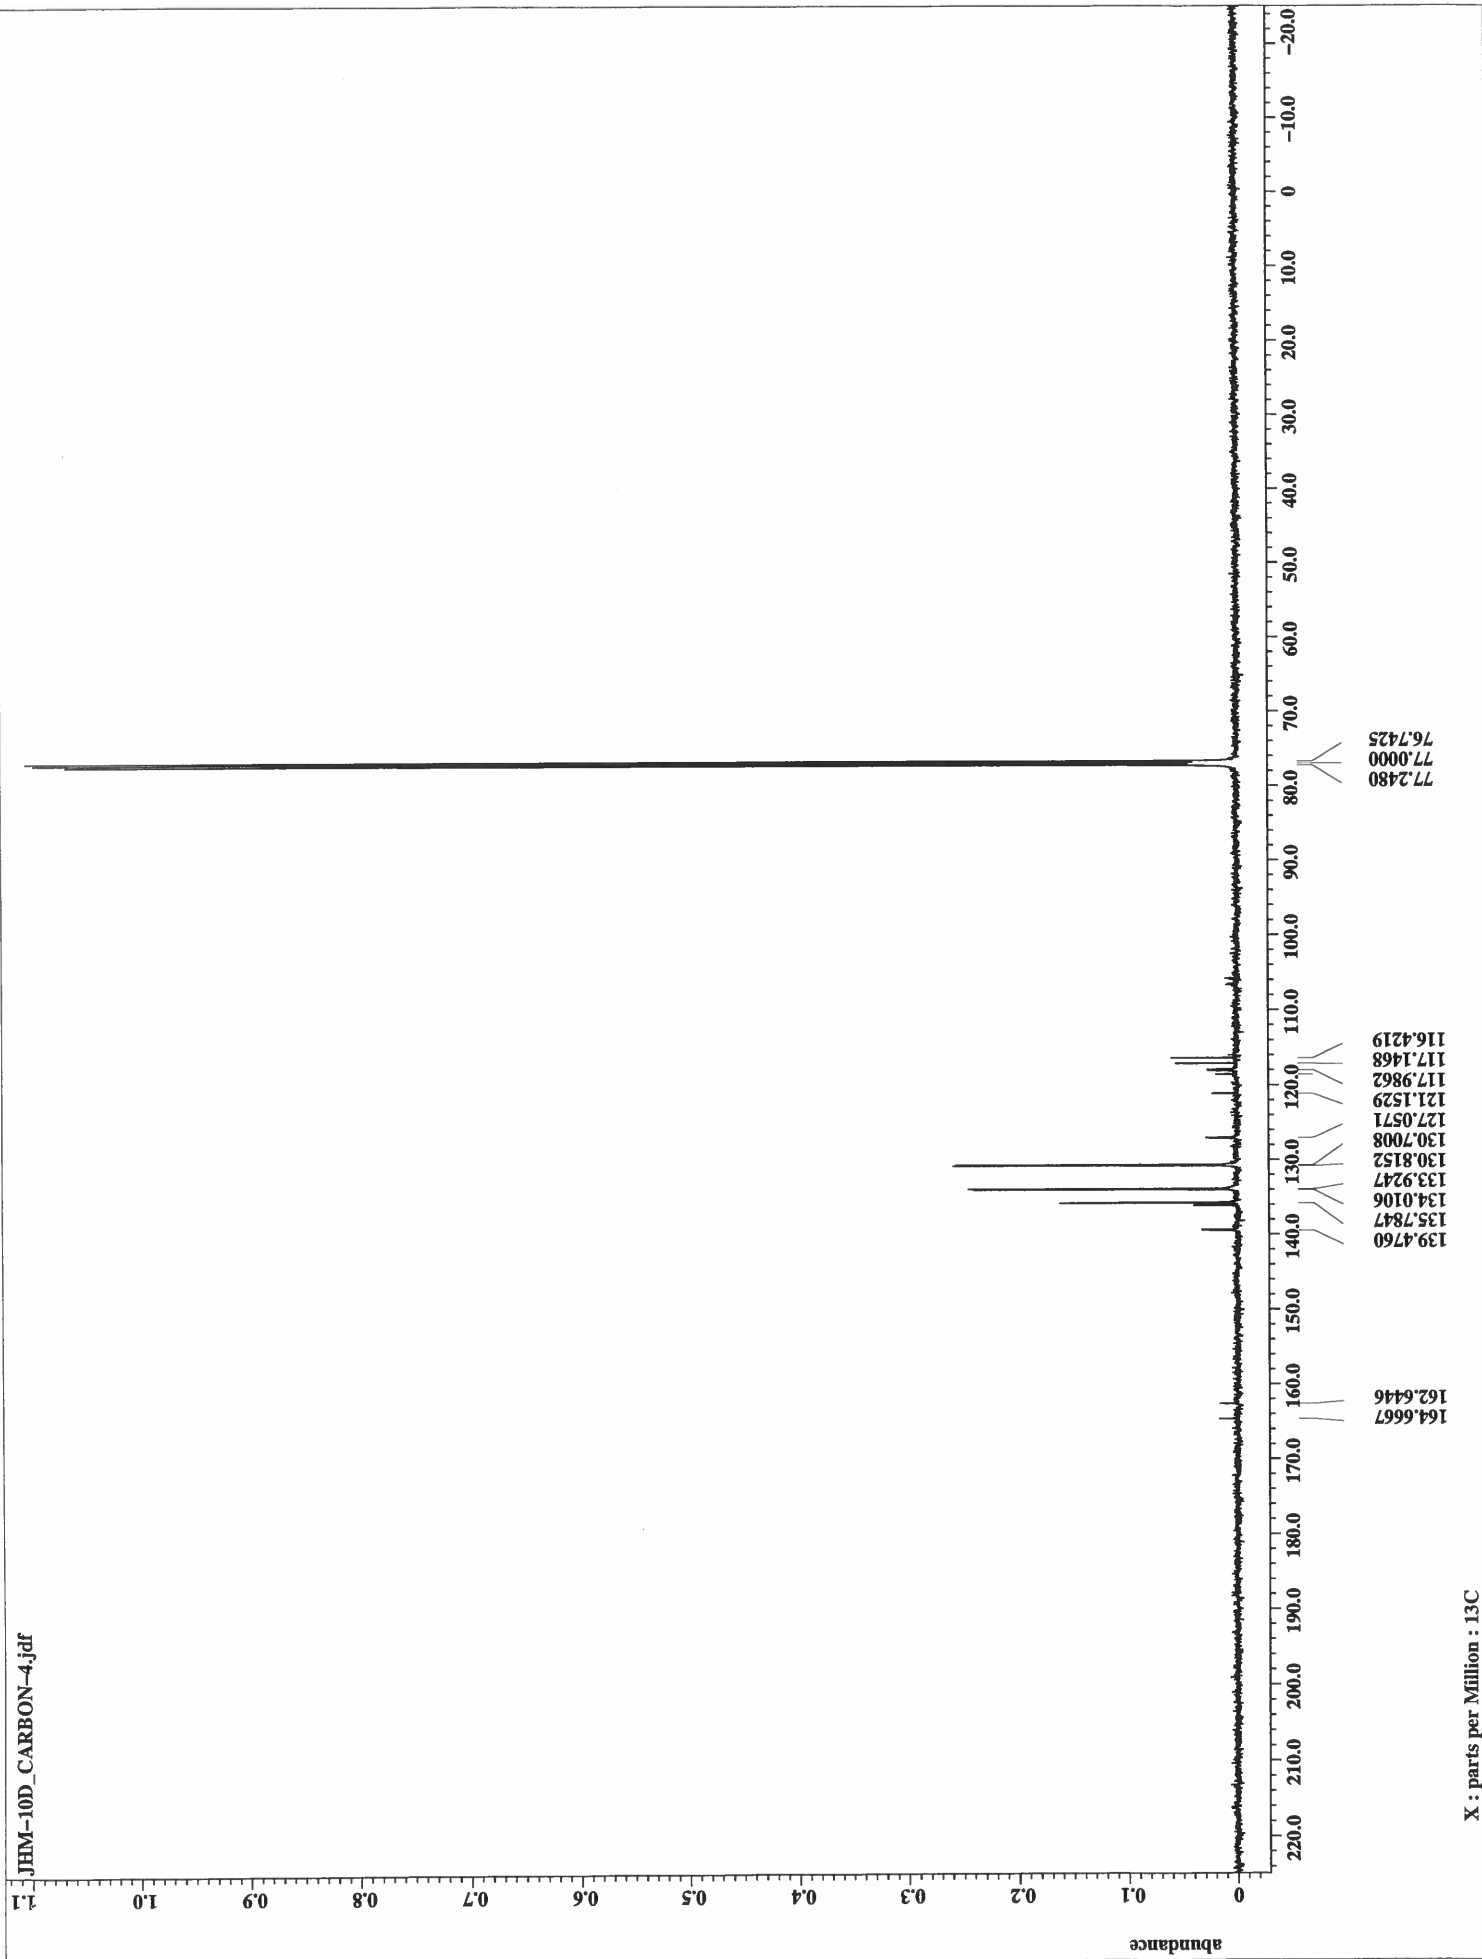

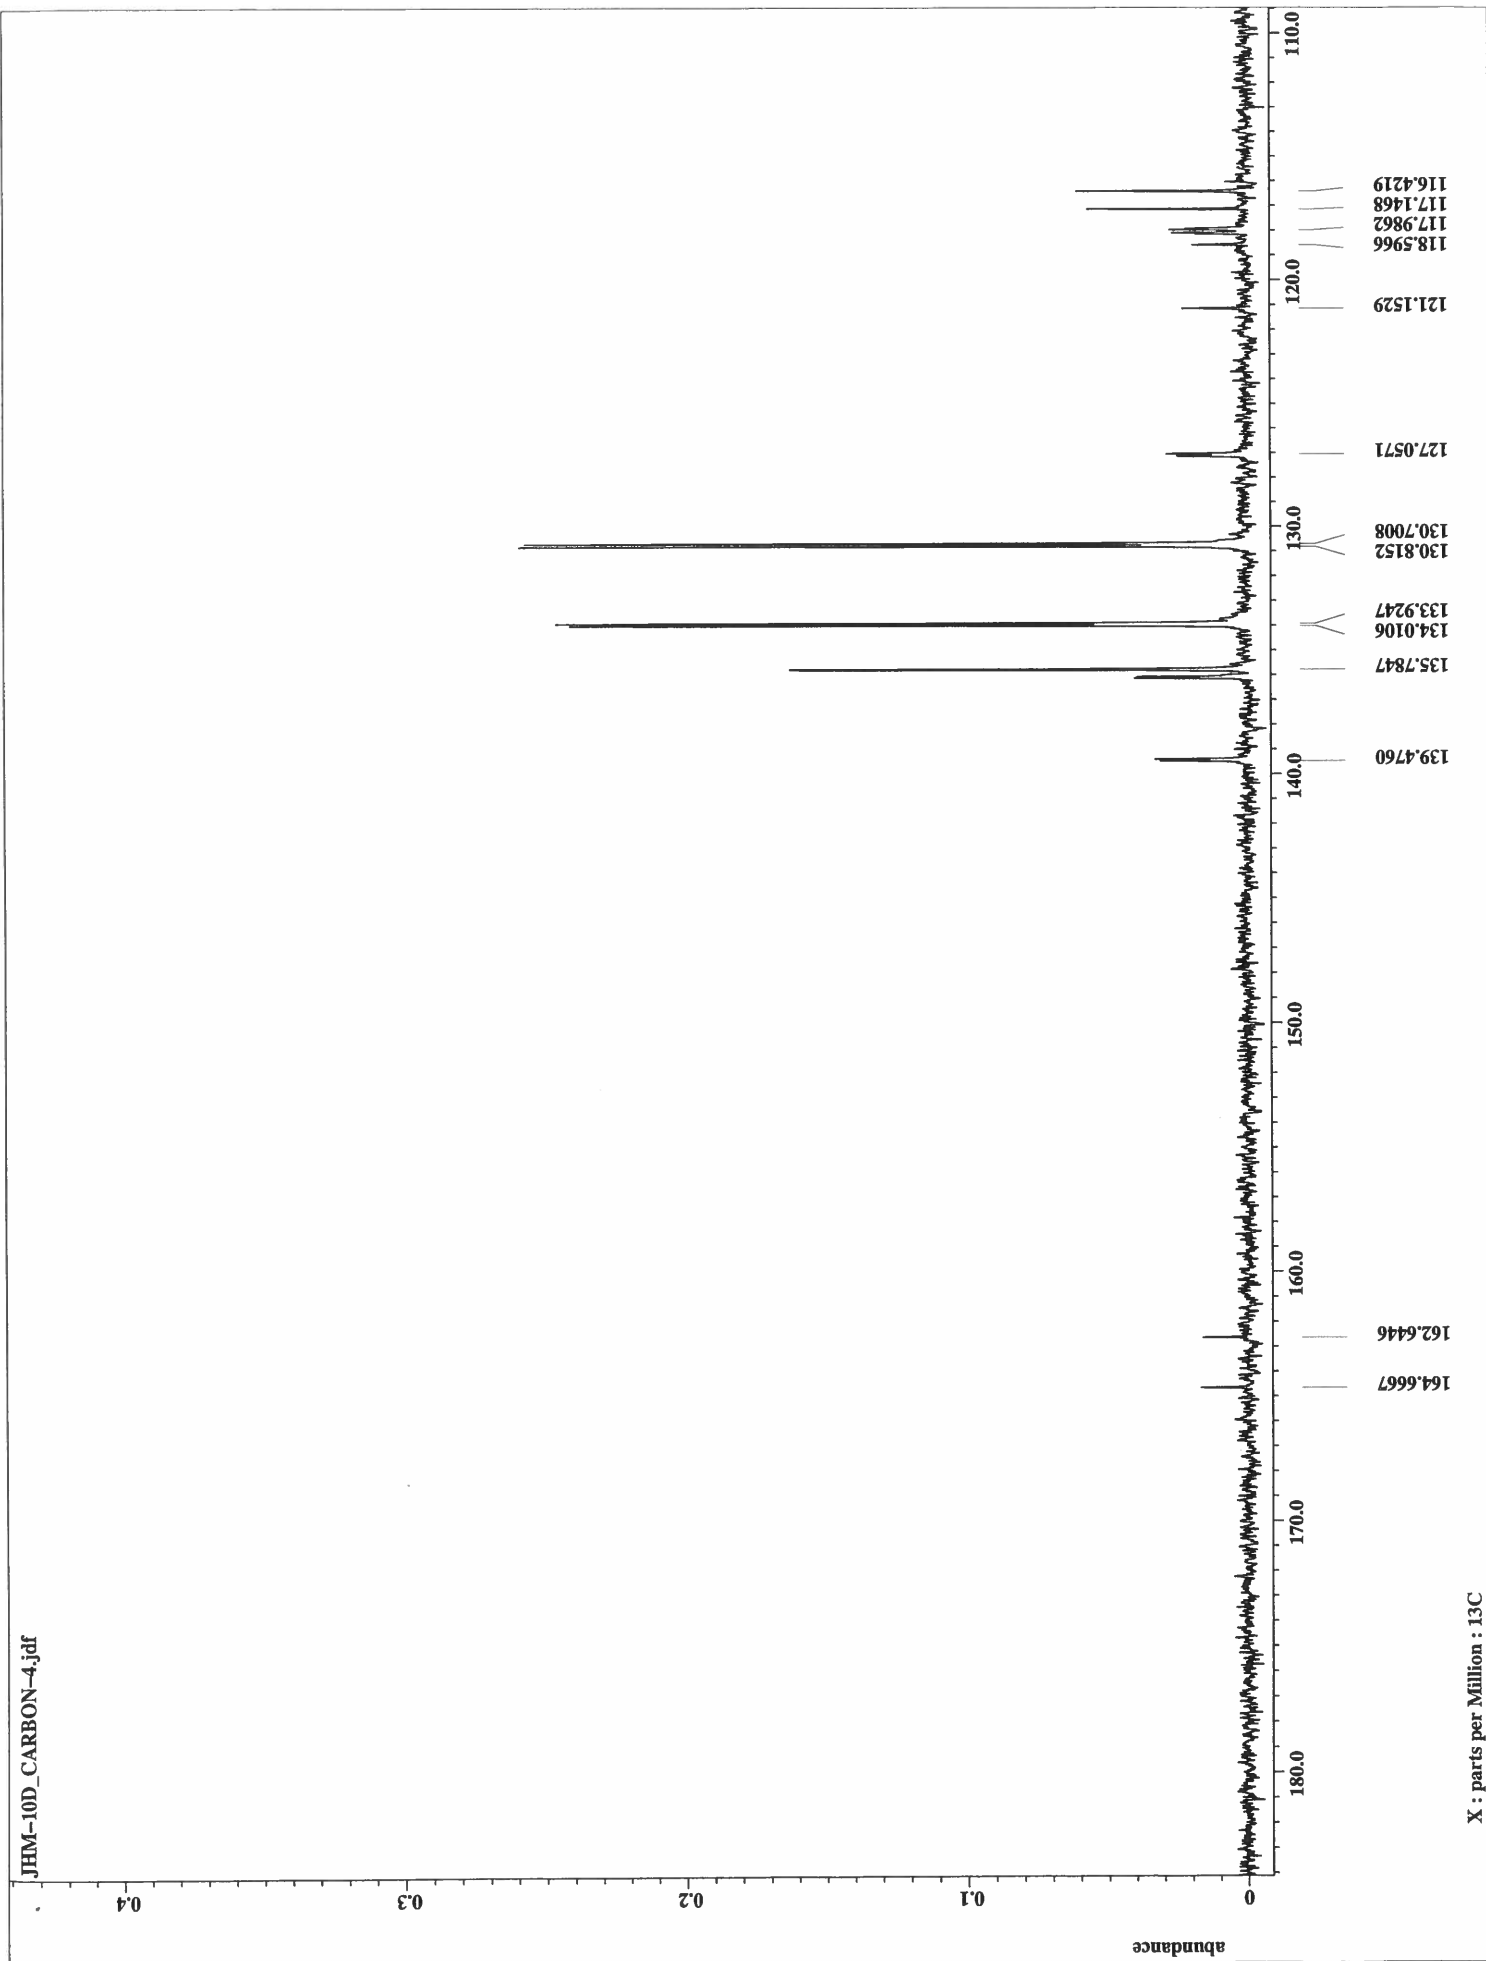

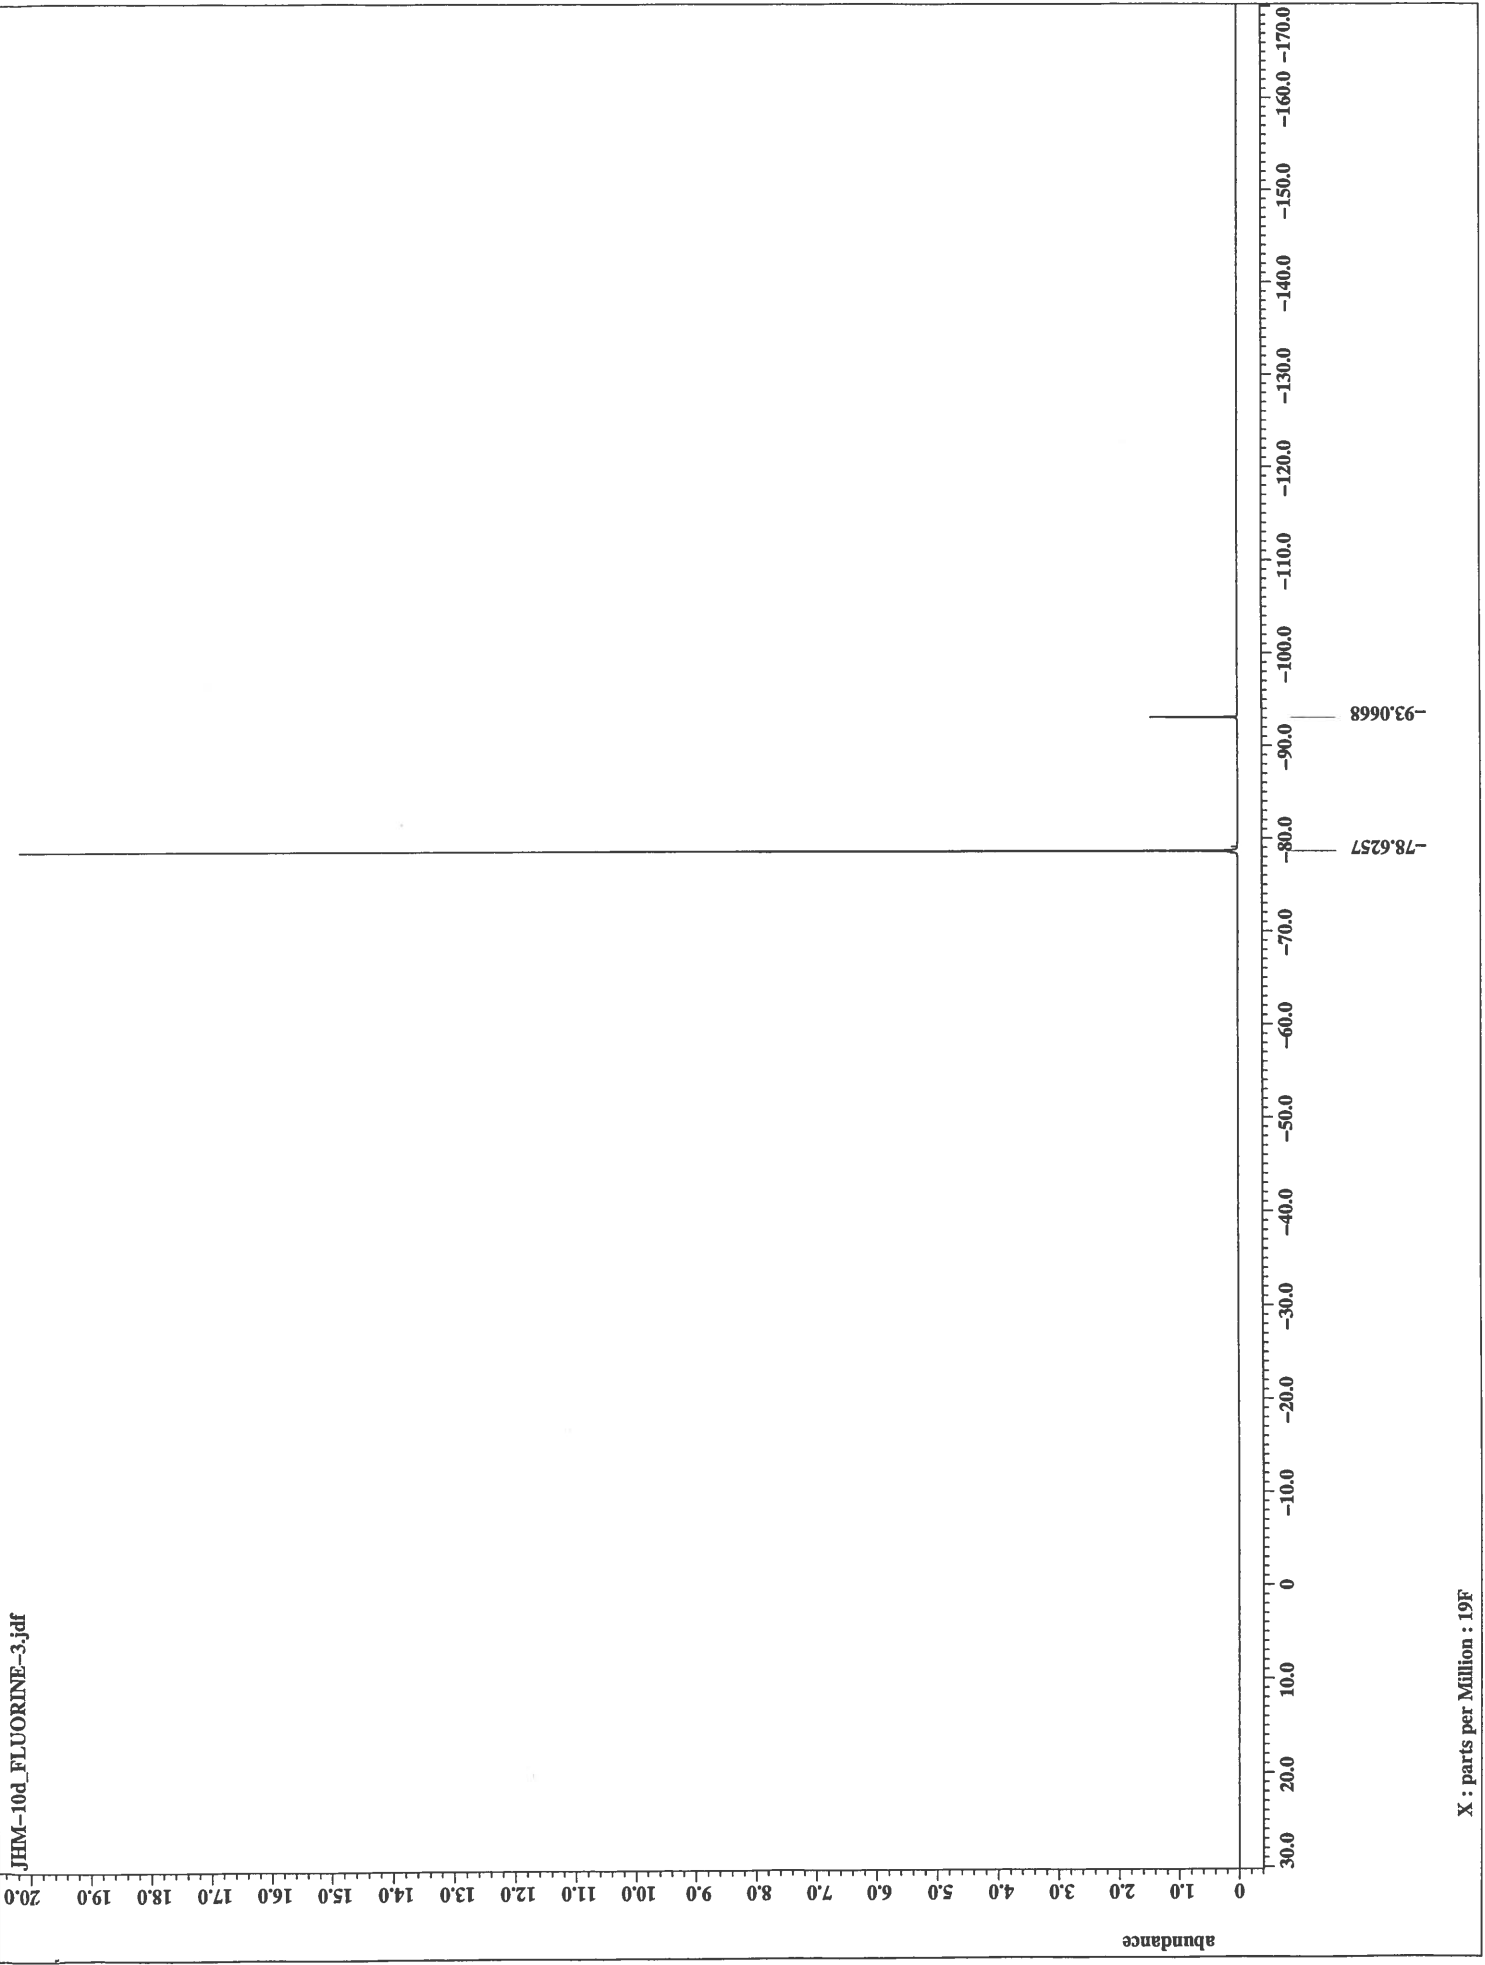

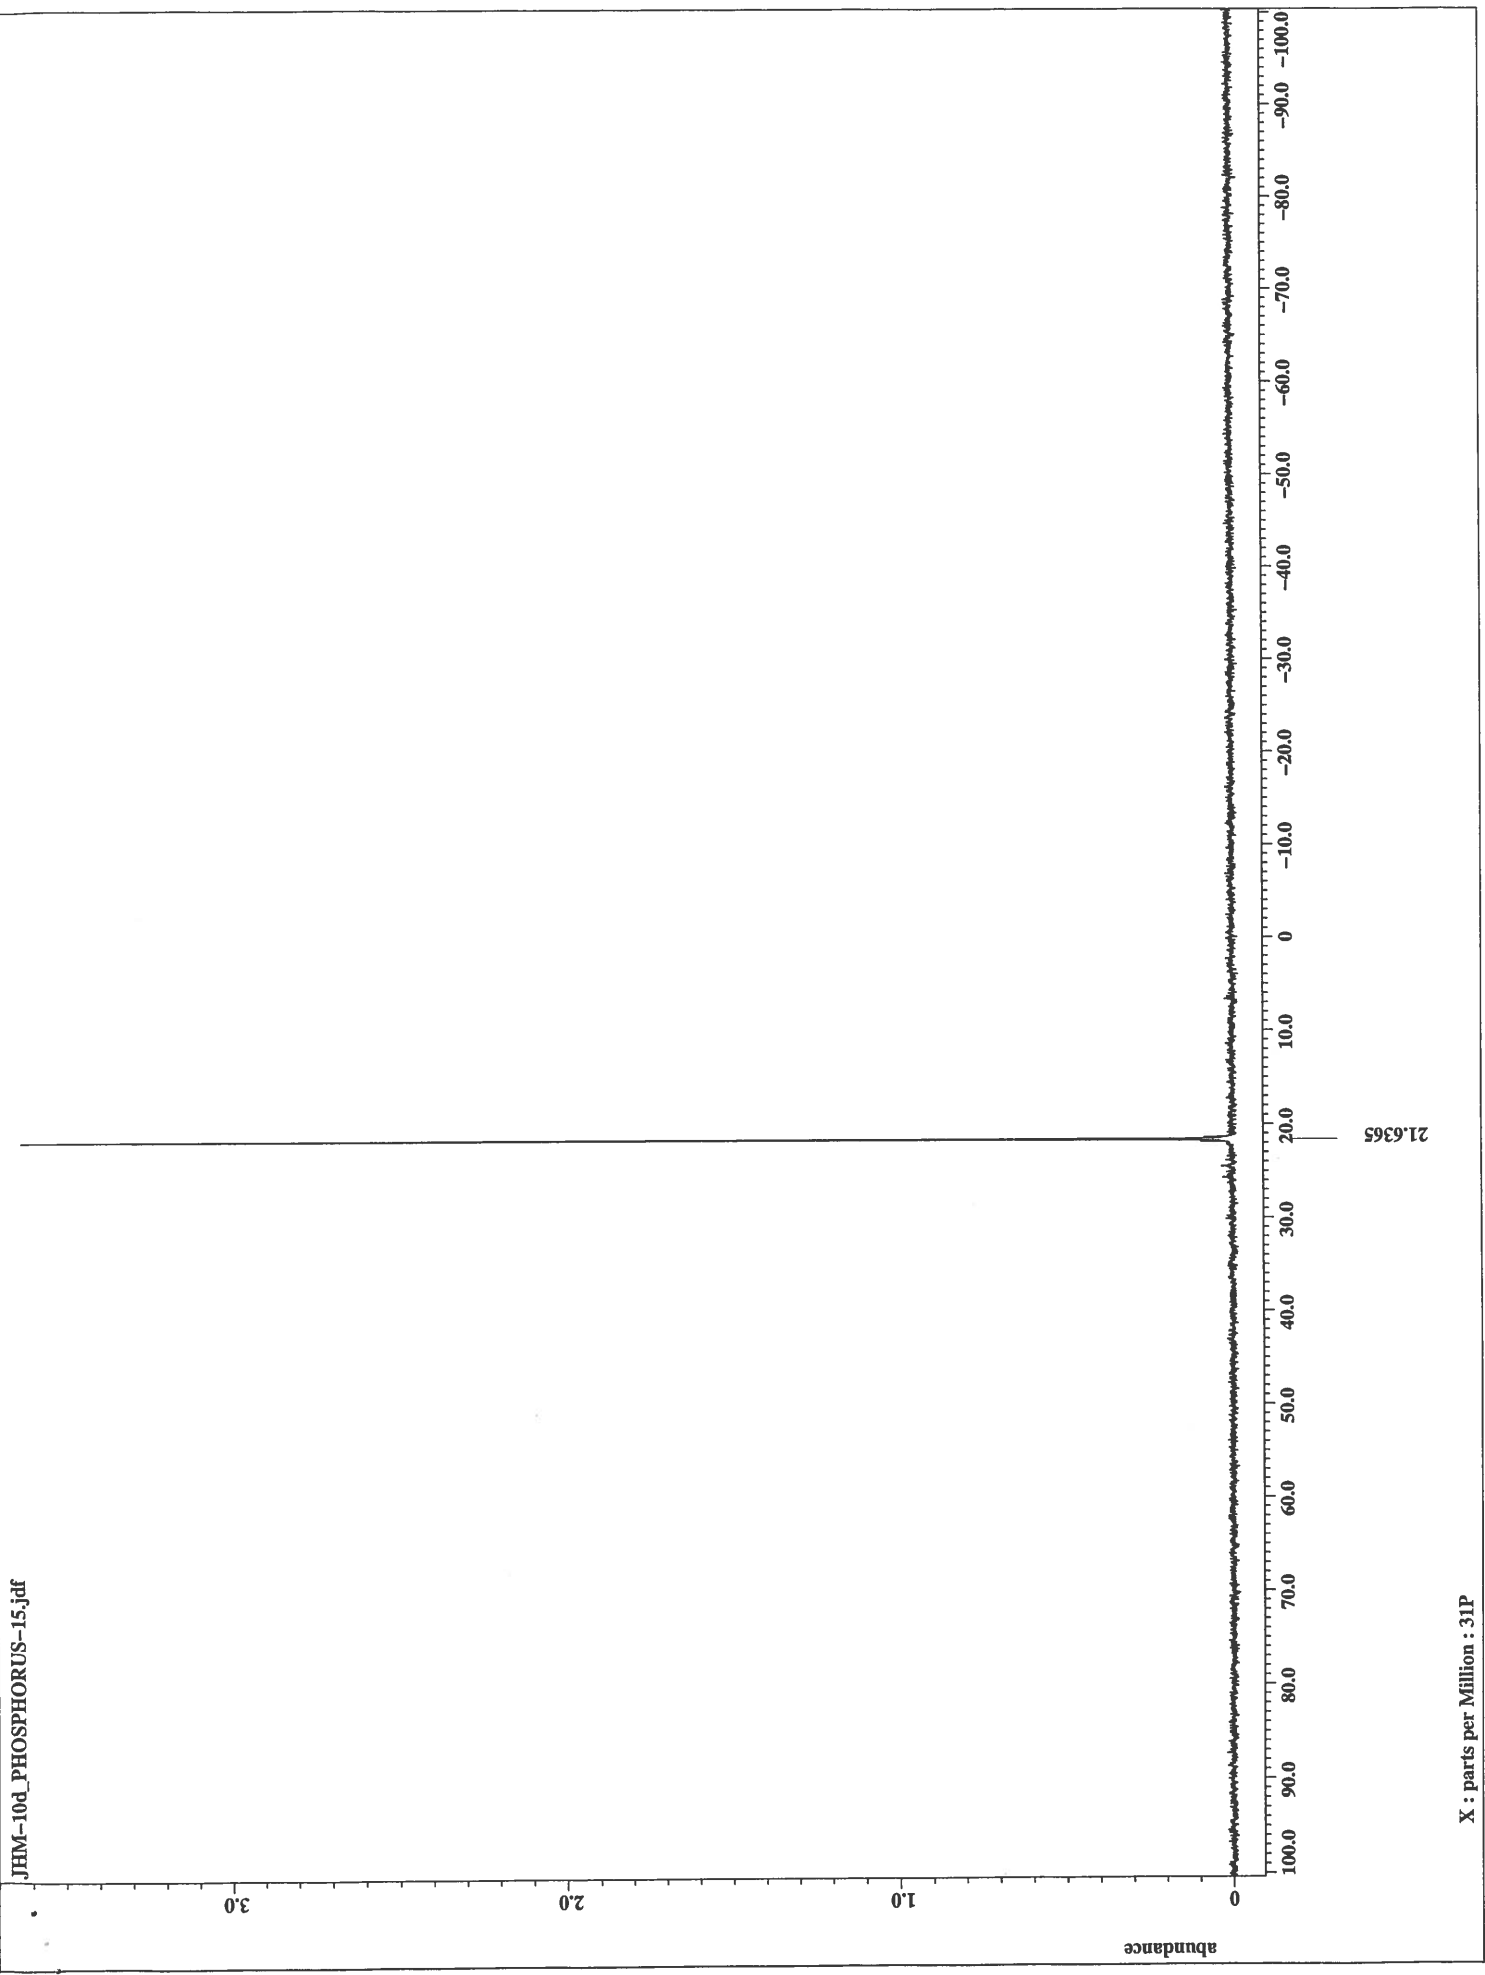

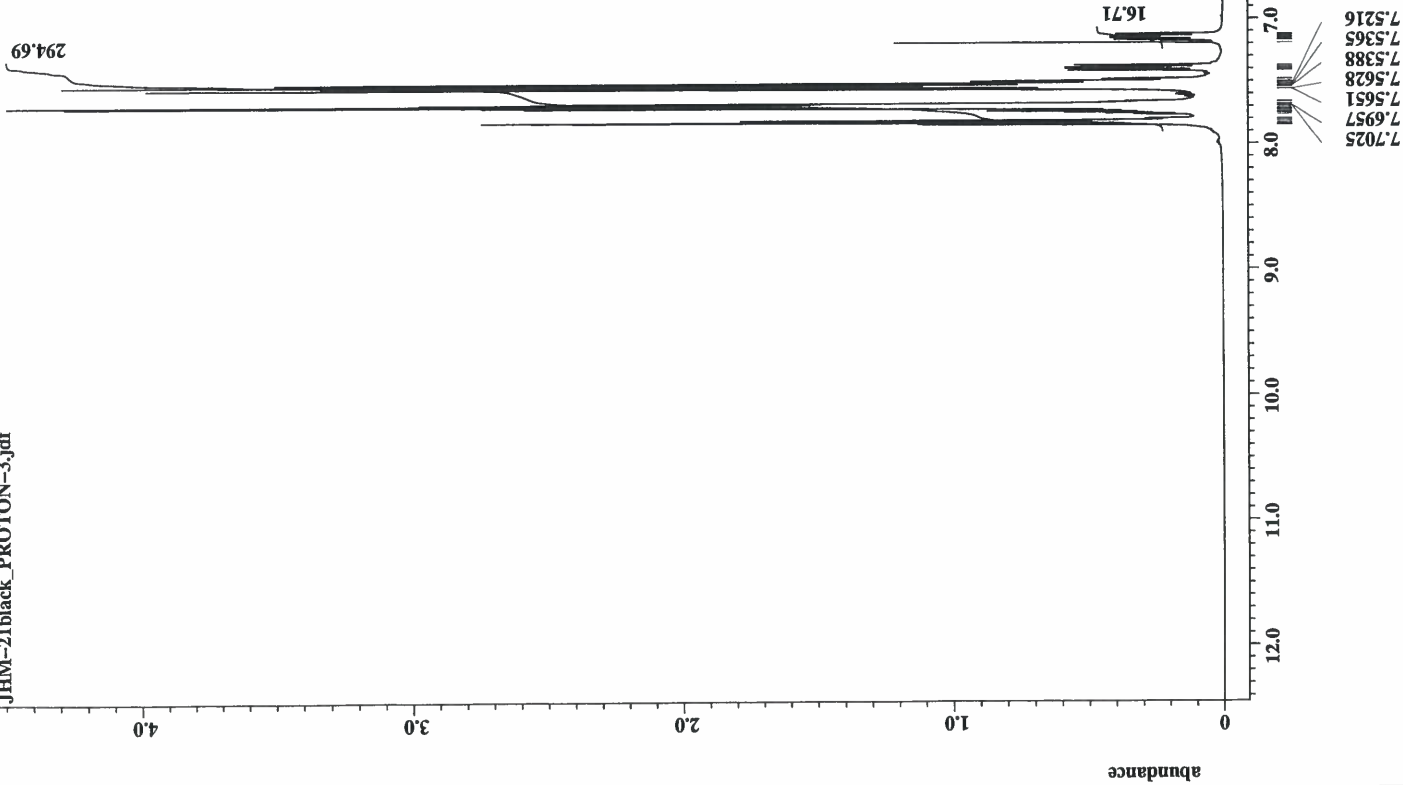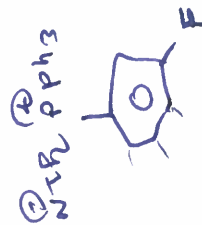

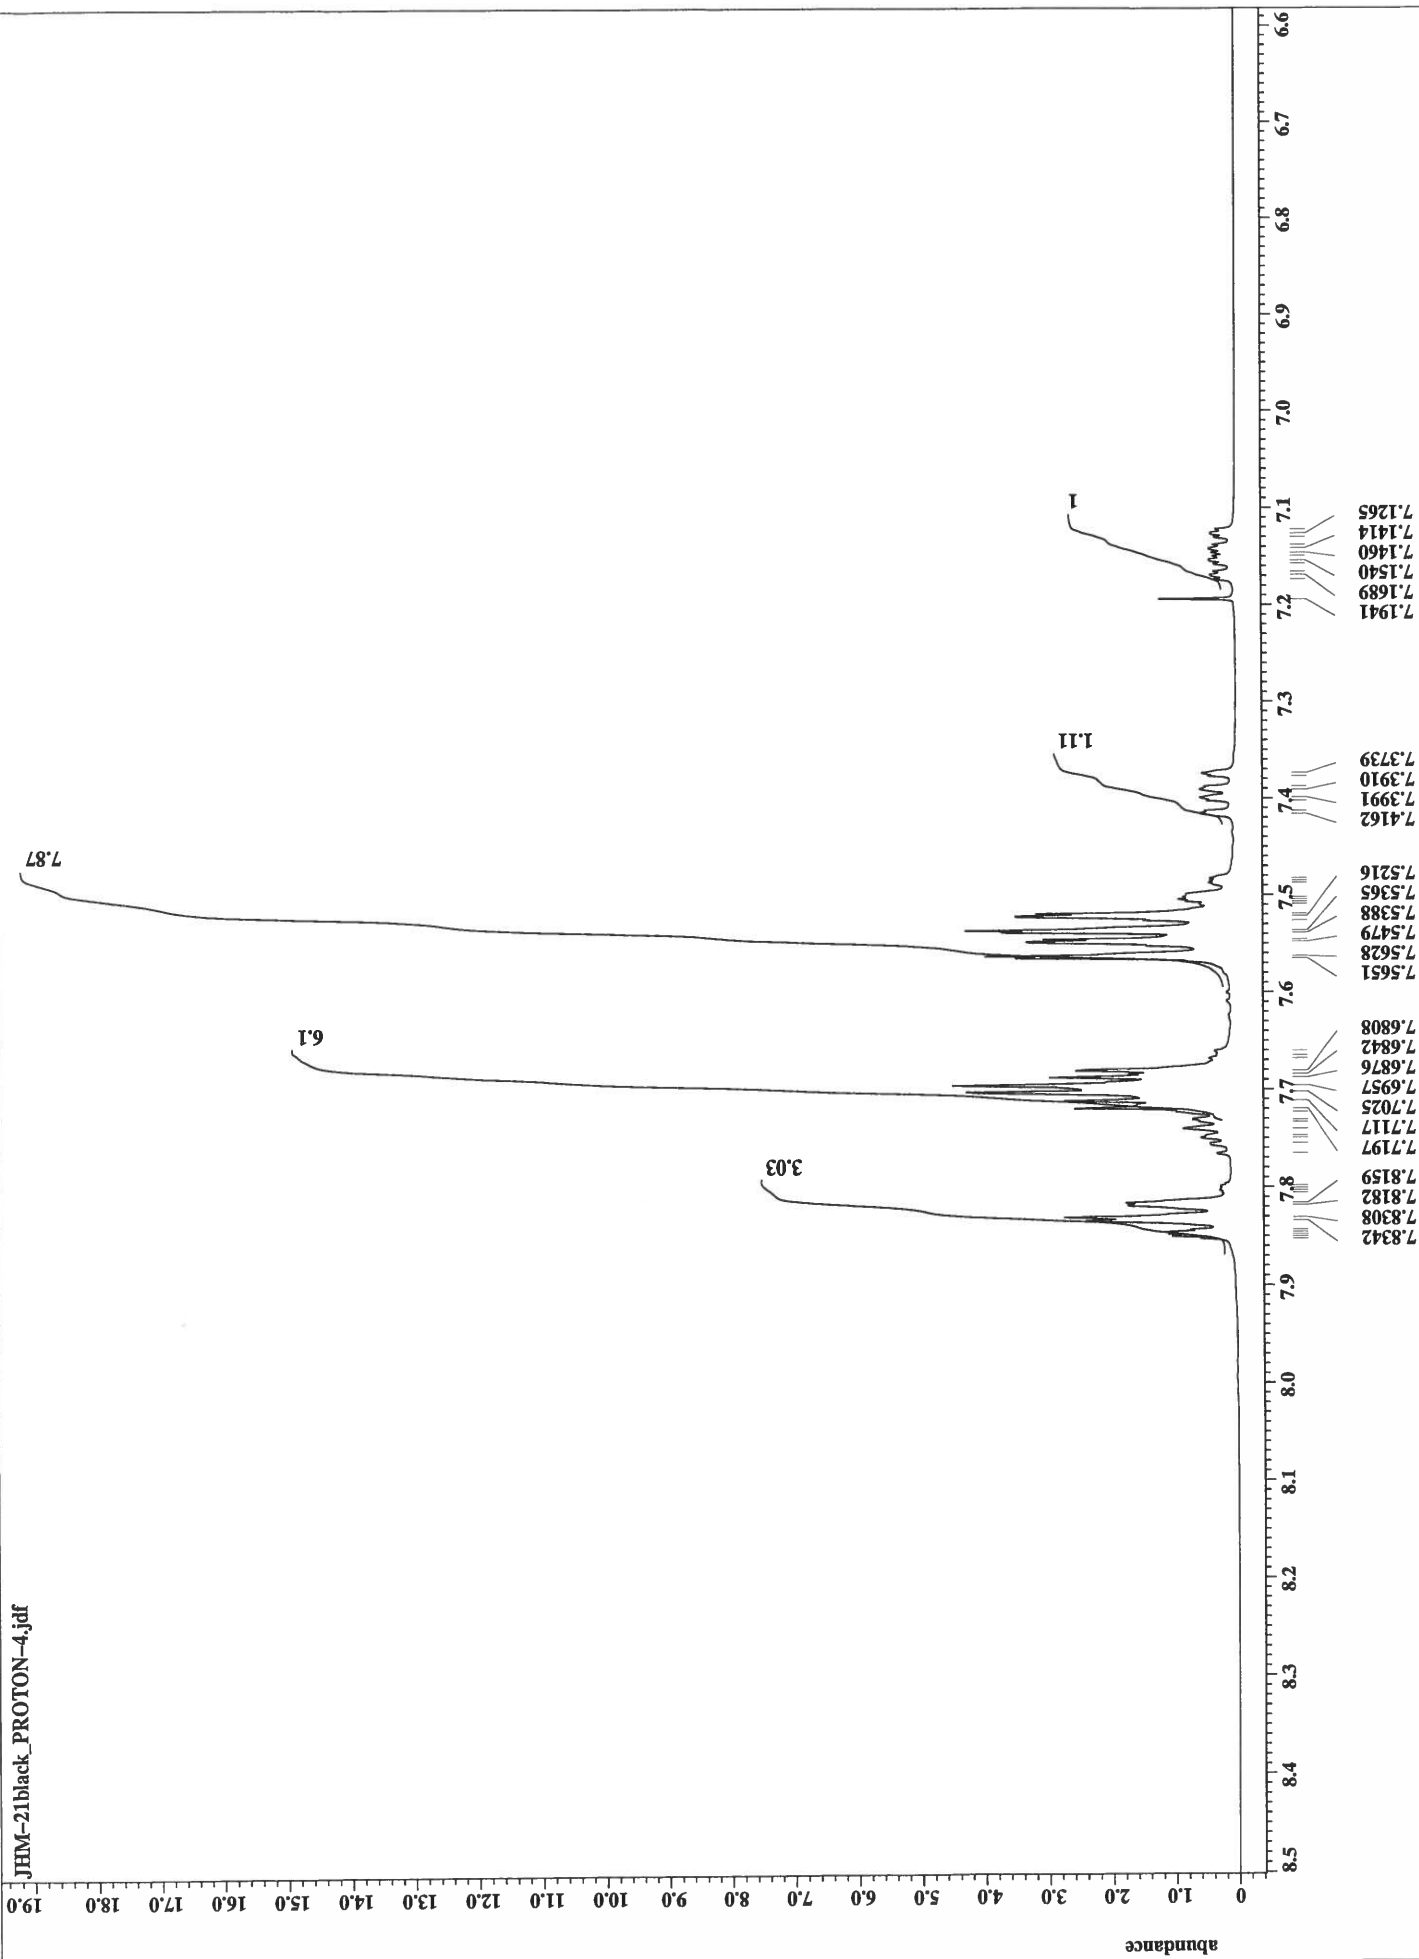

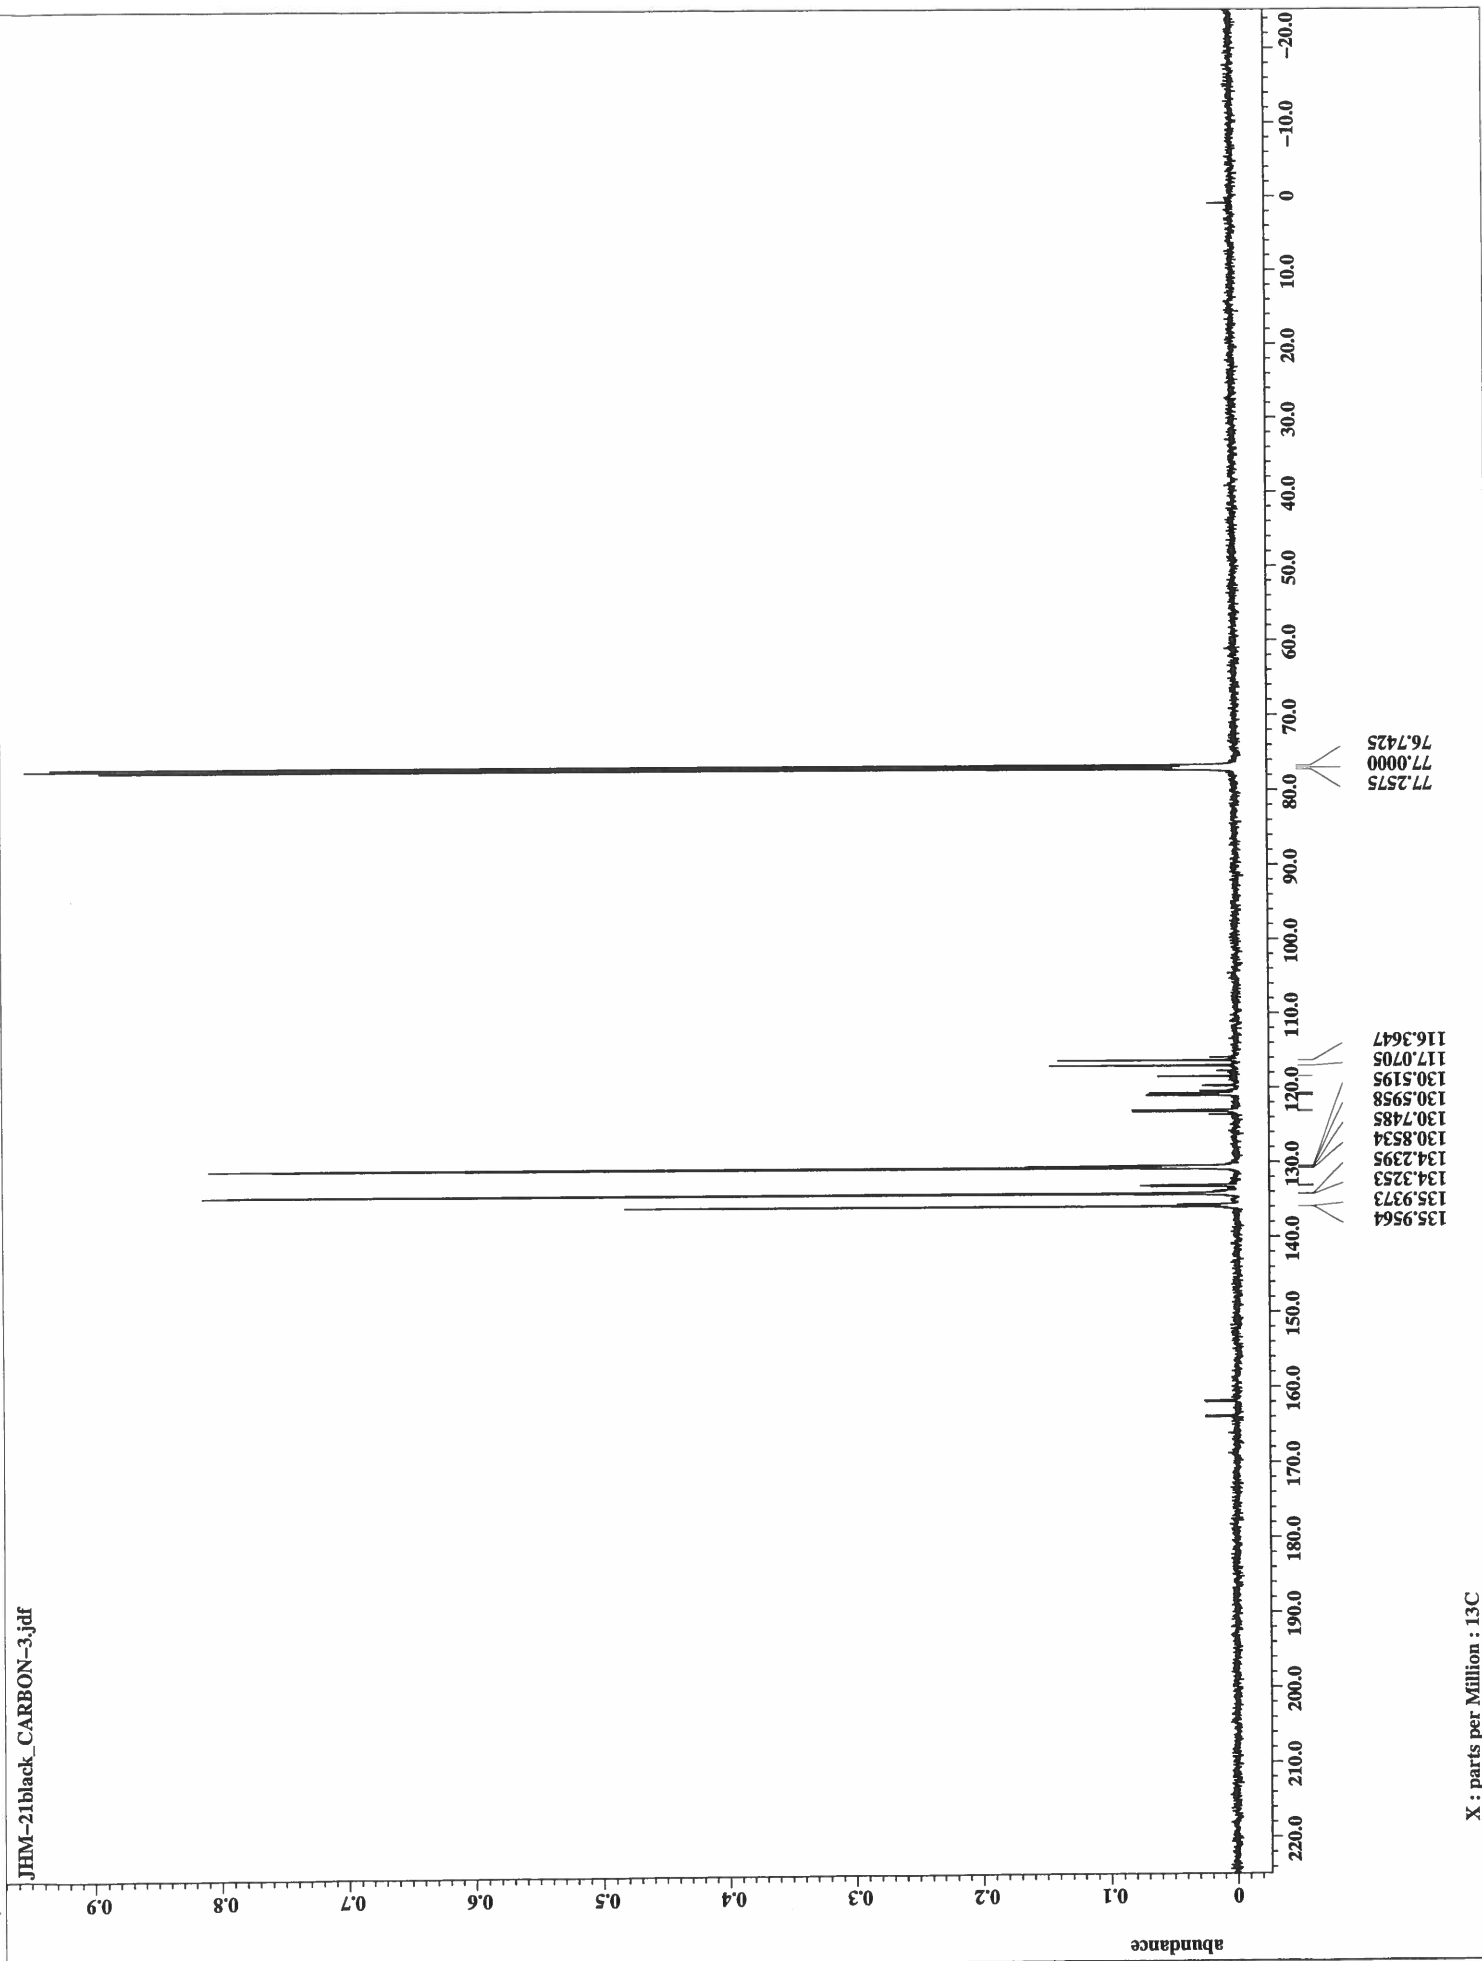



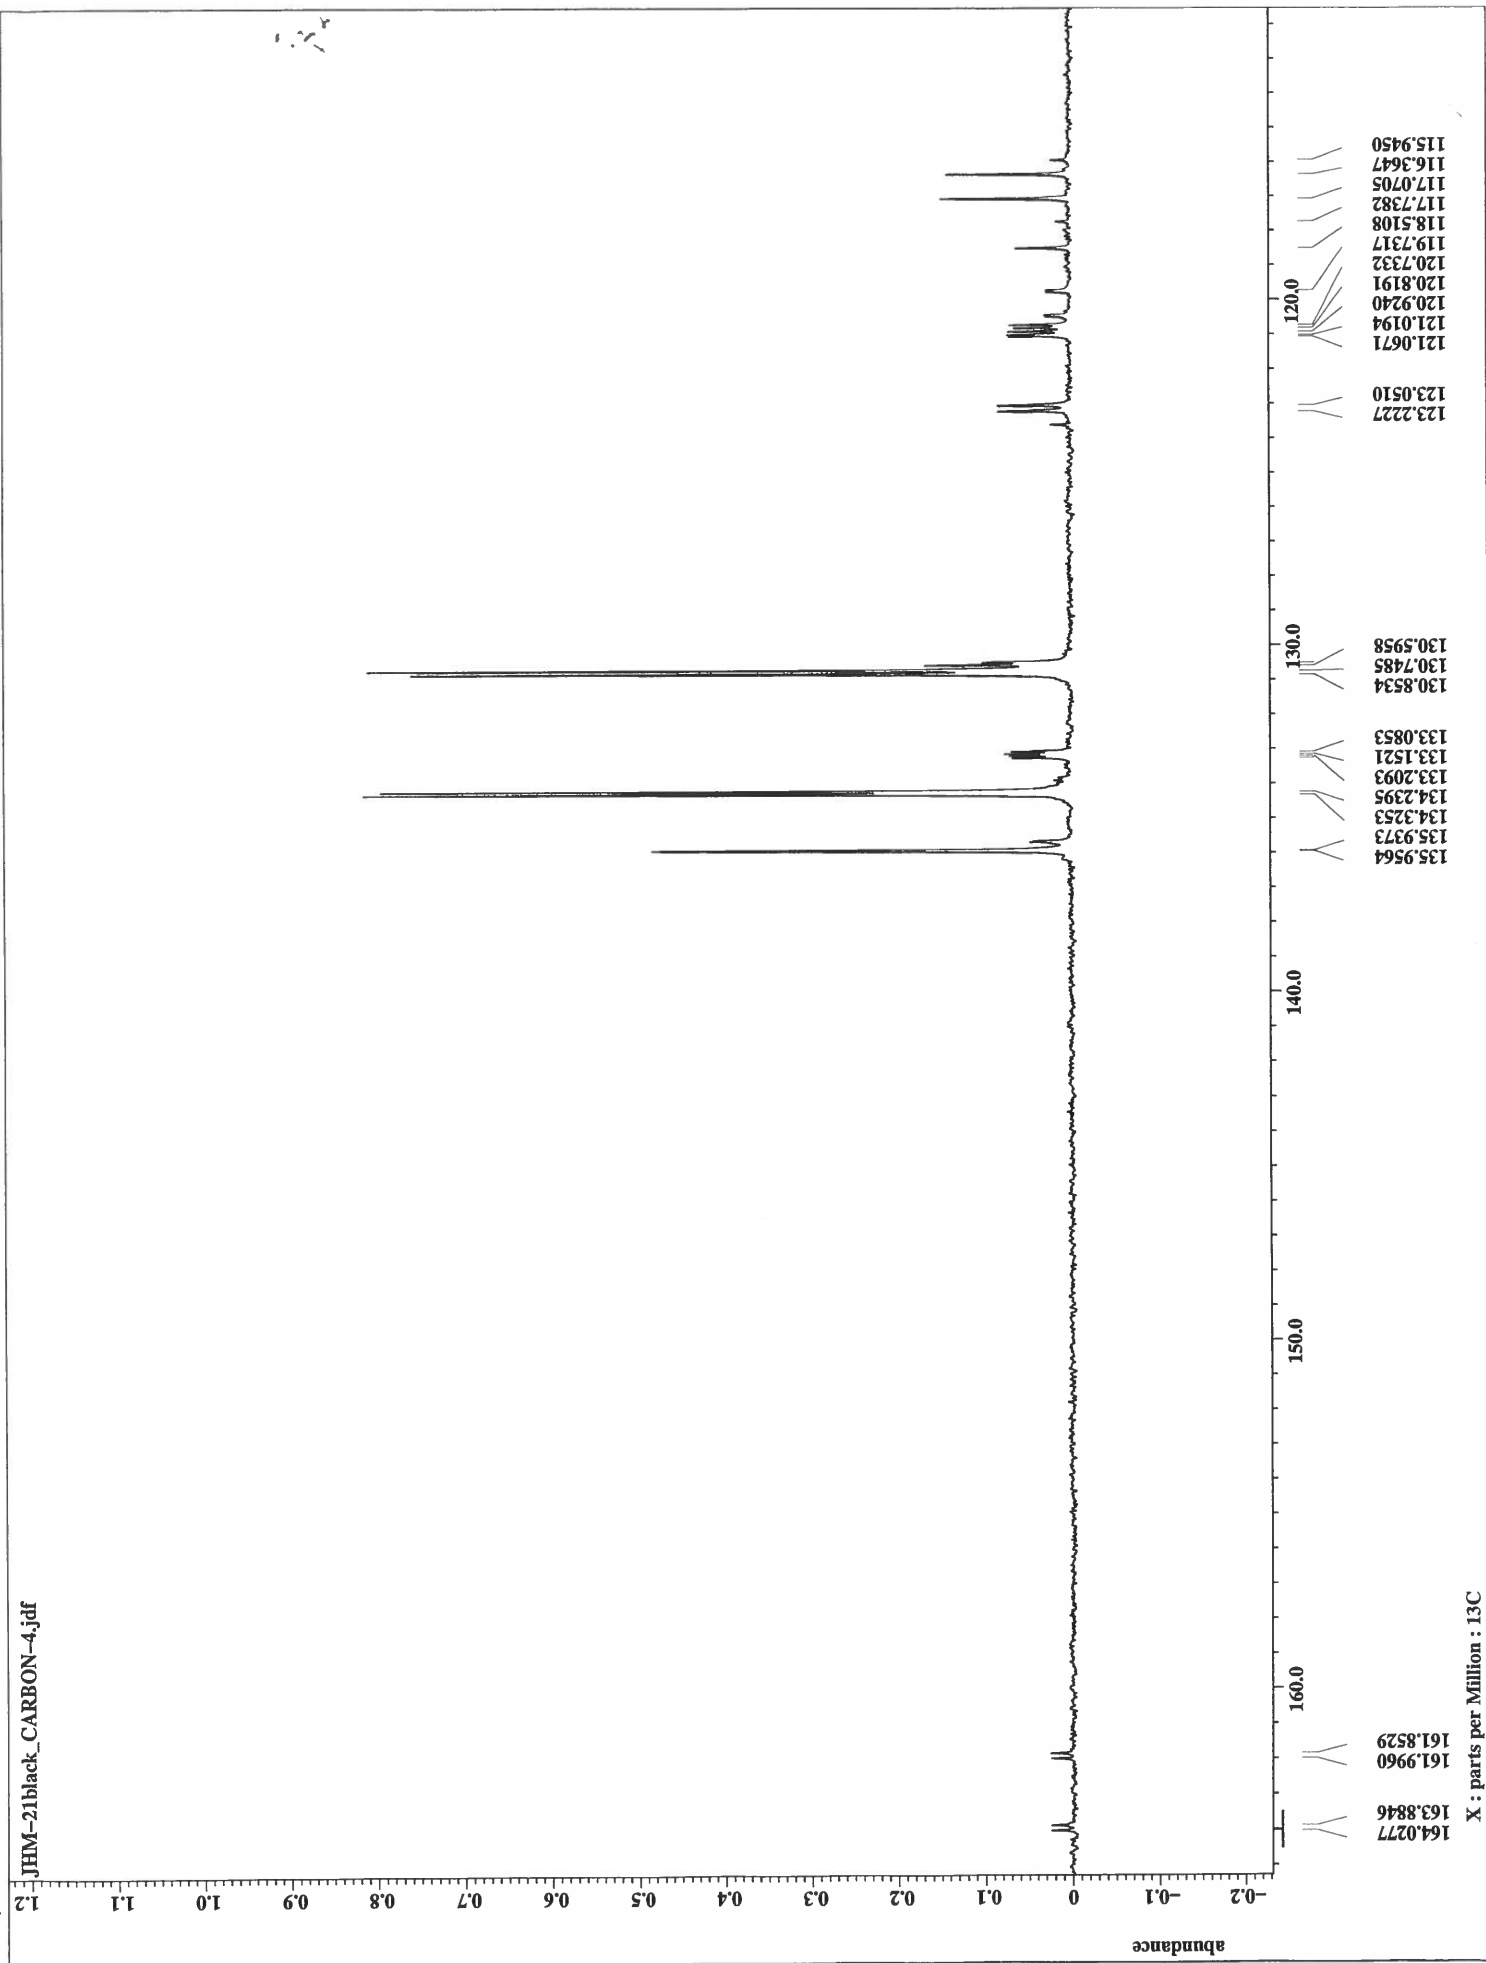

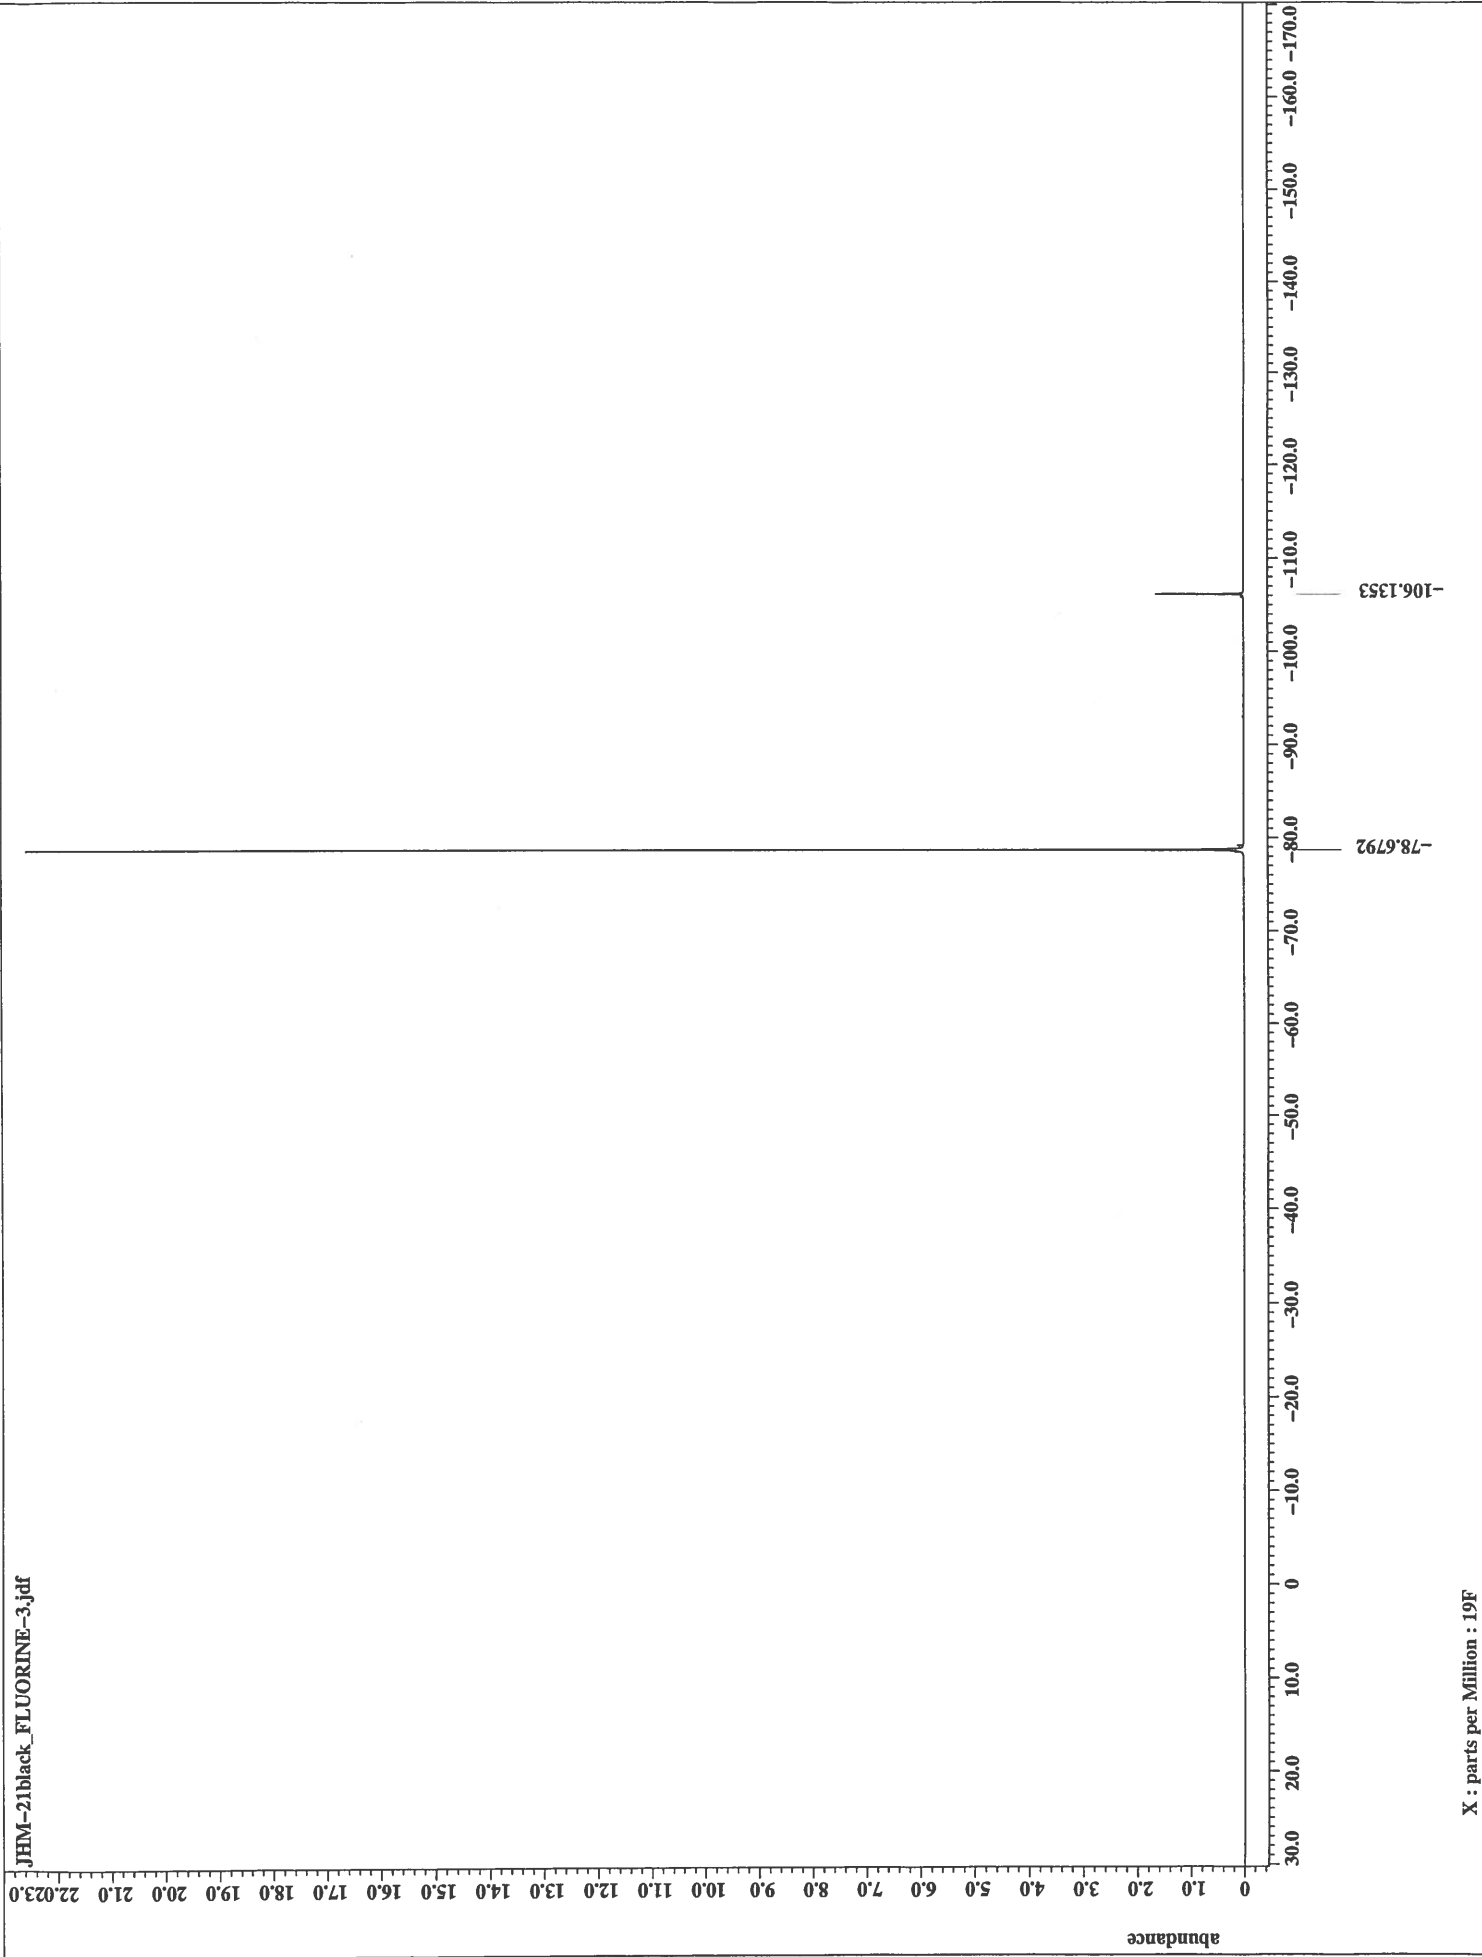

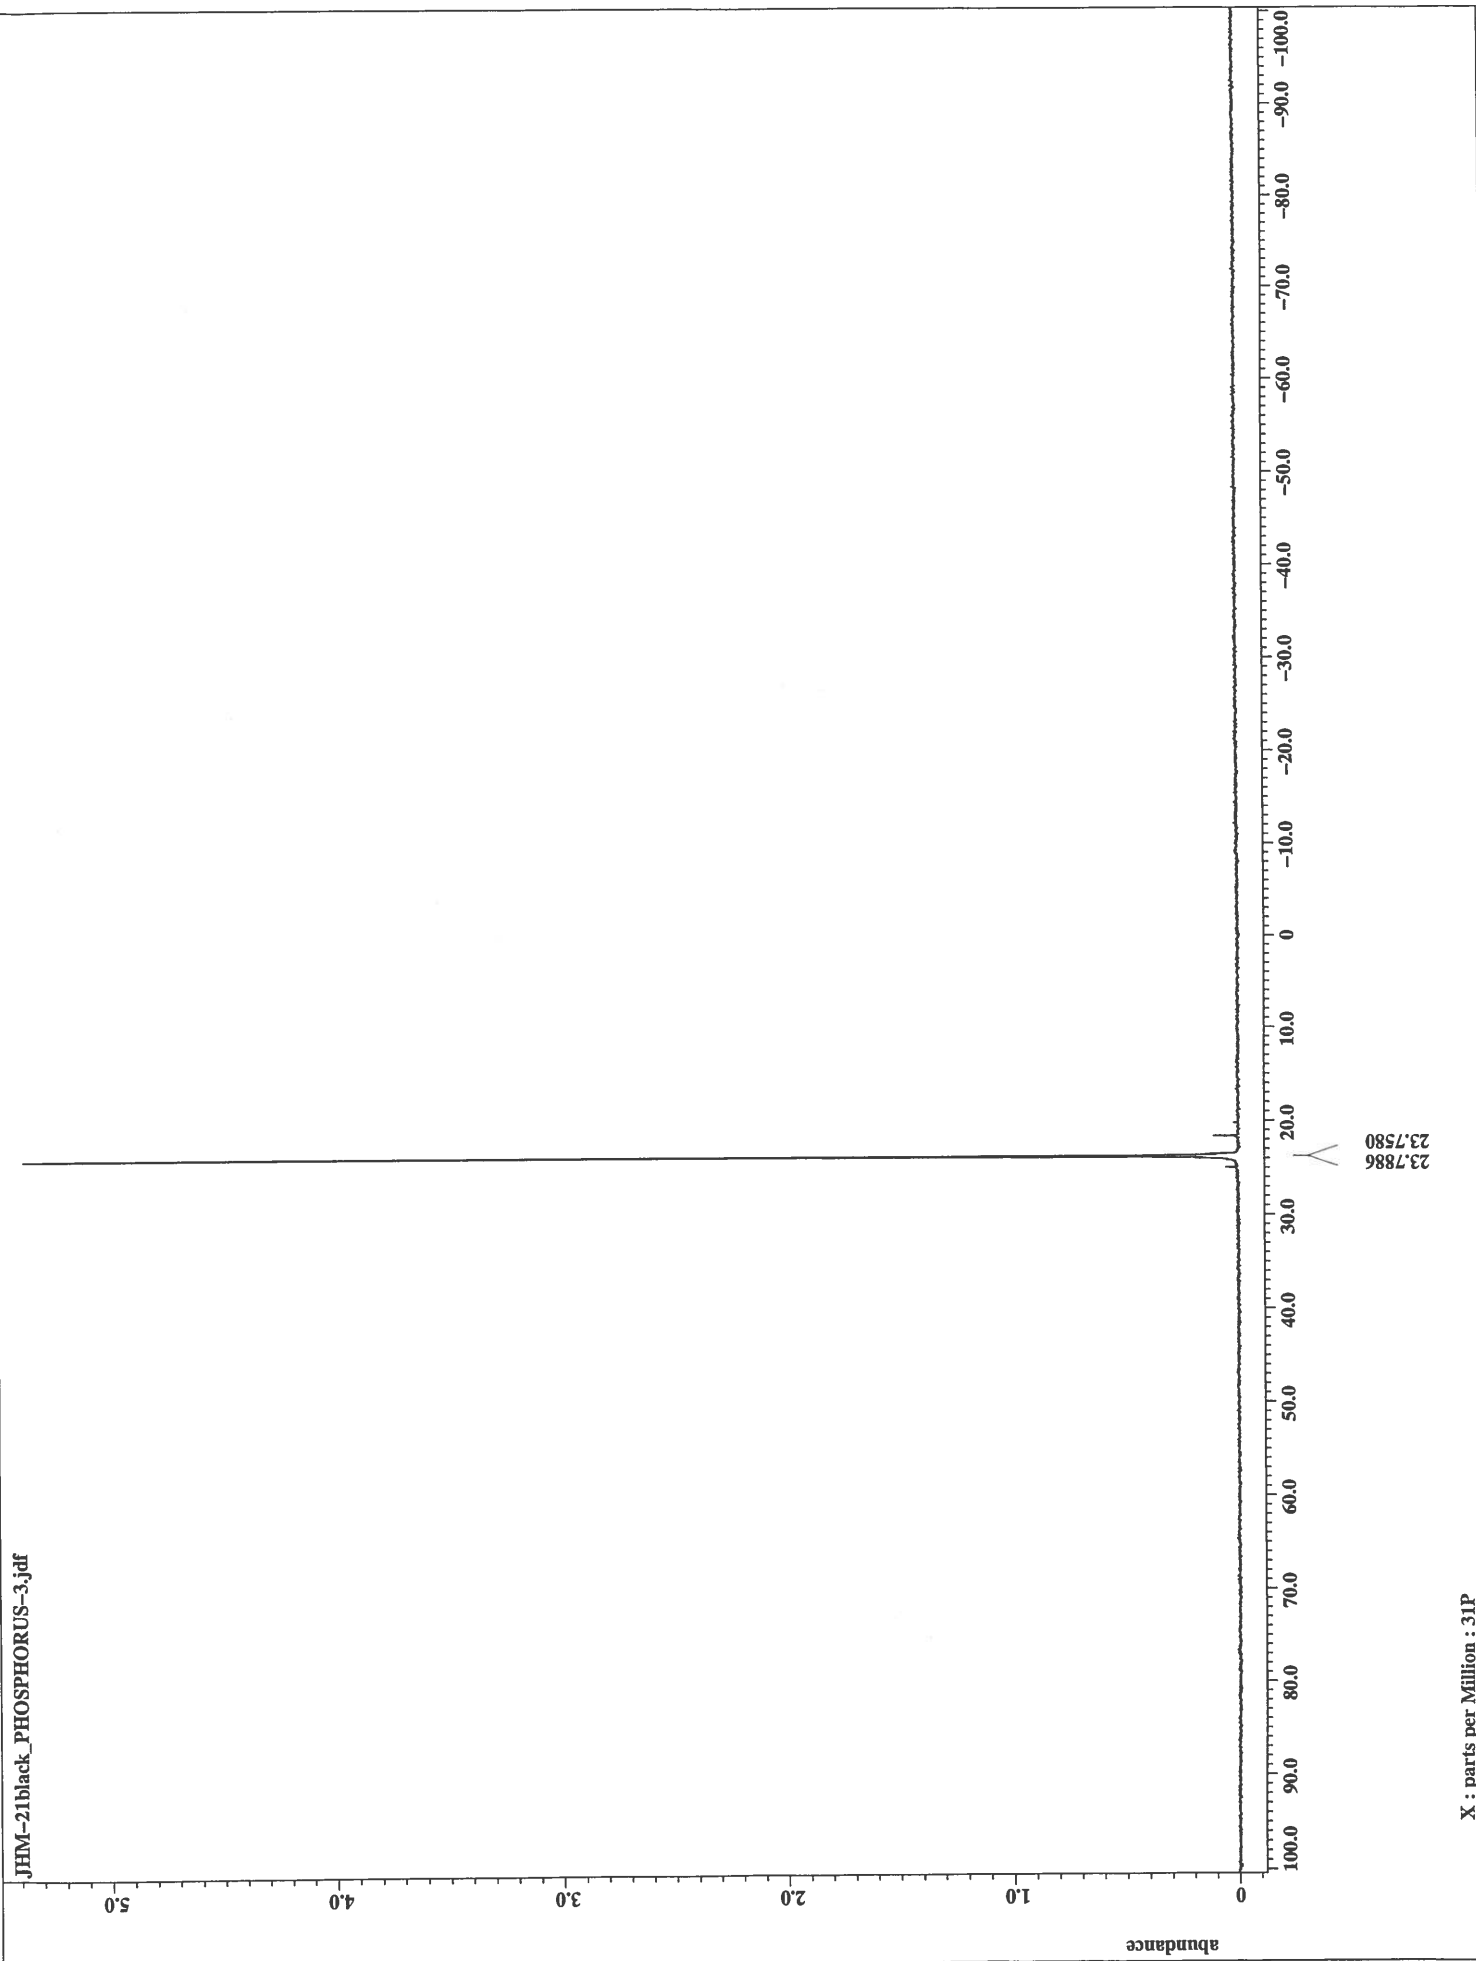

23.7886  
23.7580

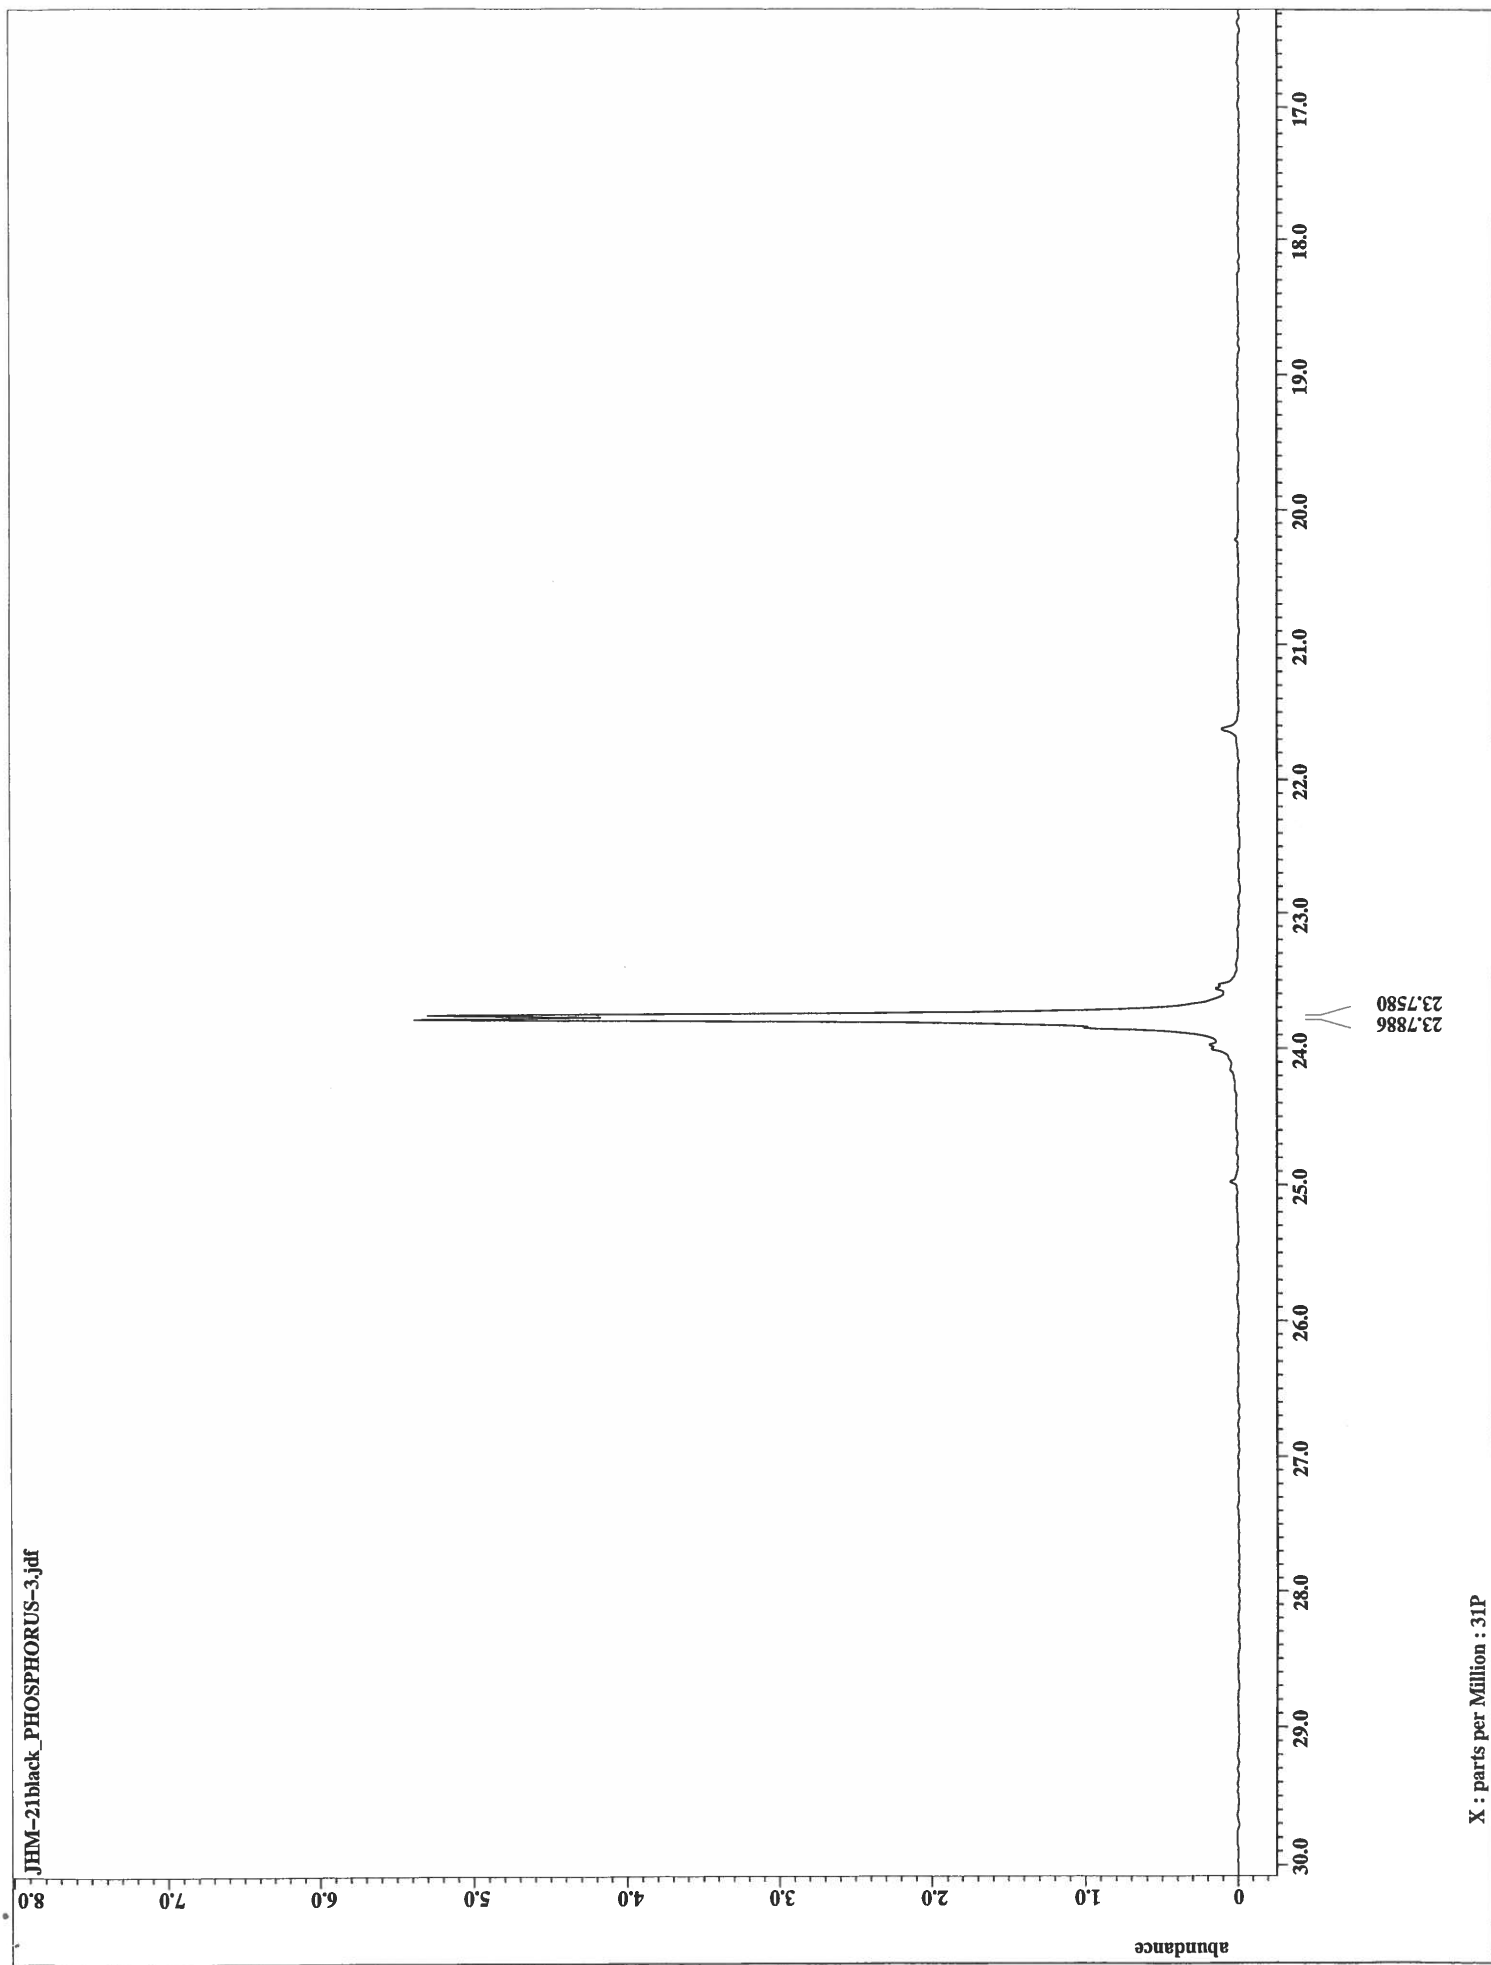

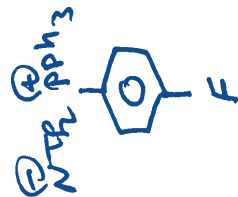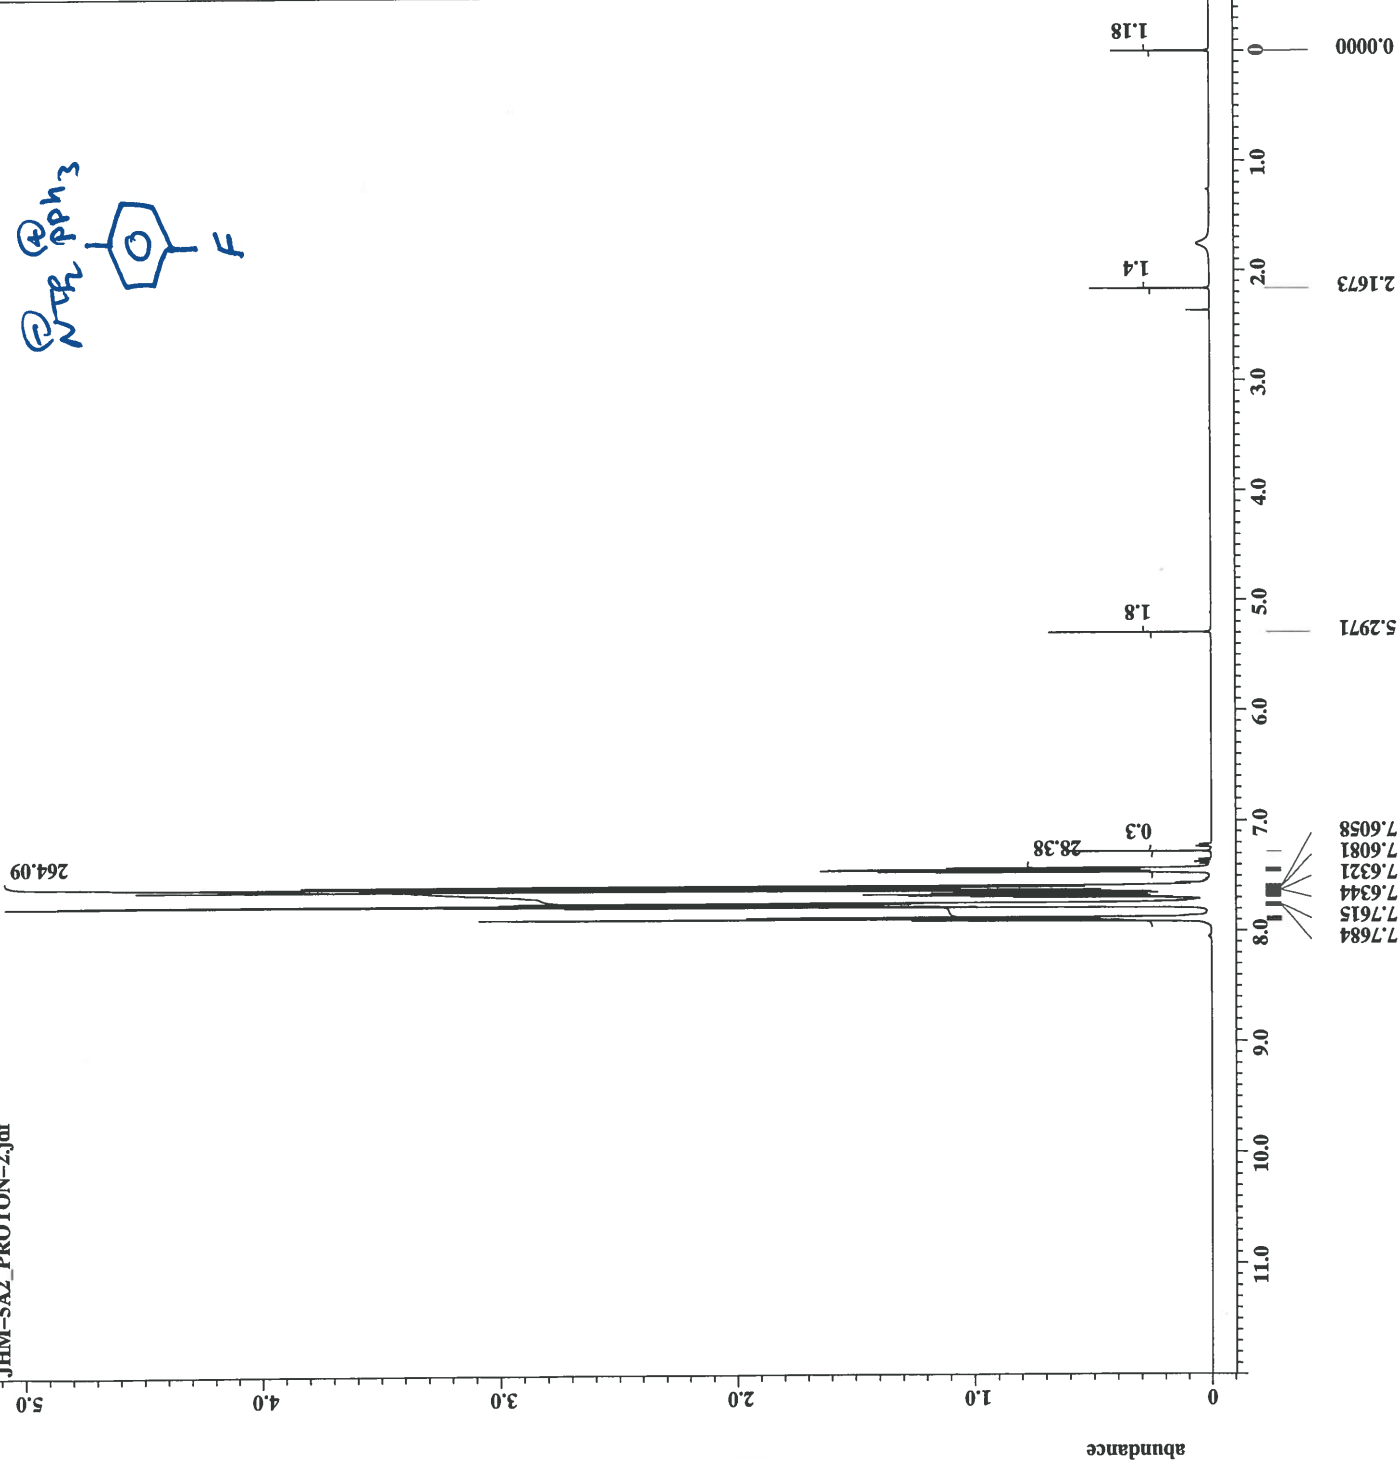

X : parts per Million : 1H

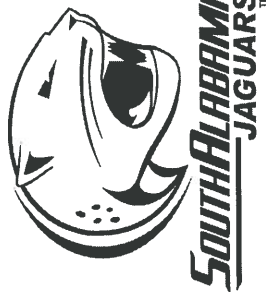

Filename = JHM-5A2\_PROTON-2.jdf  
 Author = Jim Davis  
 Experiment = single\_pulse.ex2  
 Sample\_id = JHM-5A2  
 Solvent = CHLOROFORM-D  
 Changer\_sample = 11  
 Creation\_time = 25-JUL-2018 18:25:42  
 Revision\_time = 25-JUL-2018 18:02:17  
 Current\_time = 25-JUL-2018 18:02:17  
 Data\_format = 1D COMPLEX  
 Dim\_size = 13107  
 Dim\_title = 1H  
 Dim\_units = [ppm]  
 Dimensions = X  
 Site = ECA 500  
 Spectrometer = JNM-ECA500  
 Field\_strength = 11.7473579[T] (500[MH  
 X\_acq\_duration = 1.74587904[s]  
 X\_domain = 1H  
 X\_freq = 500.15991521[MHz]  
 X\_offset = 5.0[ppm]  
 X\_points = 16384  
 X\_prescans = 1  
 X\_resolution = 0.57277737[Hz]  
 X\_sweep = 9.38438438[kHz]  
 Irr\_domain = 1H  
 Irr\_freq = 500.15991521[MHz]  
 Irr\_offset = 5.0[ppm]  
 Tri\_domain = 1H  
 Tri\_freq = 500.15991521[MHz]  
 Tri\_offset = 5.0[ppm]  
 Clipped = FALSE  
 Mod\_return = 1  
 Scans = 100  
 Total\_scans = 100  
 X\_90\_width = 12.4[us]  
 X\_acq\_time = 1.74587904[s]  
 X\_angle = 45[deg]  
 X\_atn = 4[db]  
 X\_pulse = 6.2[us]  
 Irr\_mode = Off  
 Tri\_mode = Off  
 Dante\_preset = FALSE  
 Initial\_wait = 1[s]  
 Recvr\_gain = 30  
 Relaxation\_delay = 4[s]  
 Repetition\_time = 5.74587904[s]  
 Temp\_get = 22.2[dc]

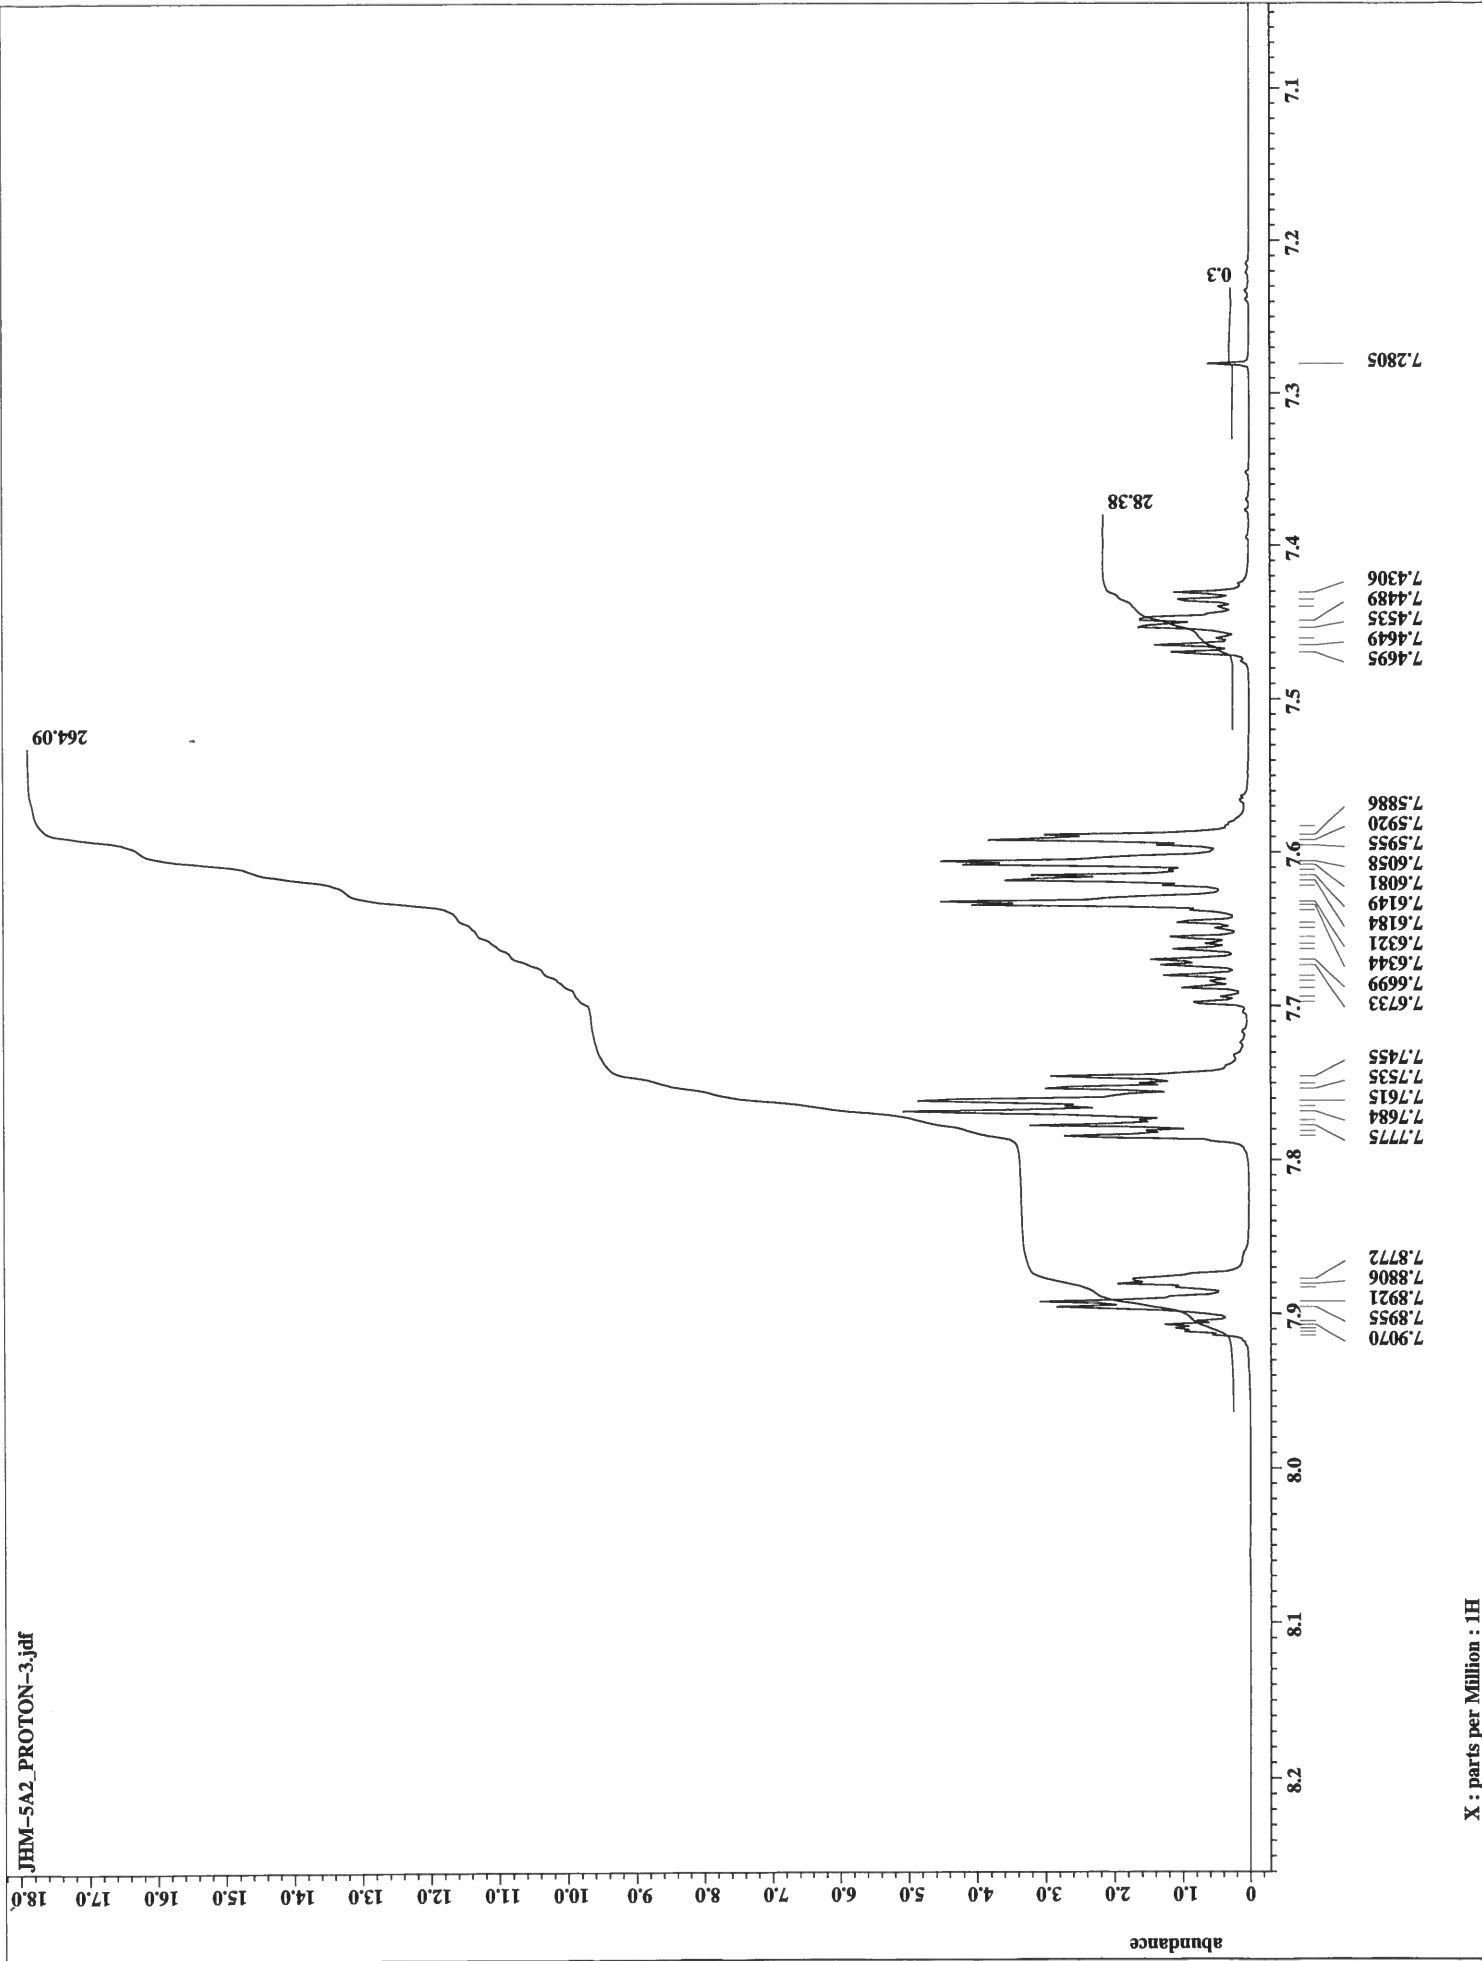

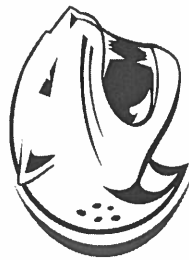
**SOUTH ALABAMA**  
**JAGUARS**

```

Filename      = JHM-5A2_CARBON-2.jdf
Author        = Jim Davis
Experiment     = single_pulse_dec
Sample_id     = JHM-5A2
Solvent       = CHLOROFORM-D
Changer_sample = 11
Creation_time  = 25-JUL-2018 19:09:09
Revision_time  = 25-JUL-2018 18:45:43
Current_time   = 25-JUL-2018 18:45:43

Data_format   = 1D COMPLEX
Dim_size      = 26214
Dim_title     = 13C
Dim_units     = [ppm]
Dimensions    = X
Site          = ECA 500
Spectrometer  = JNM-ECA500

Field_strength = 11.7473579[T] (500[MH
X_acq_duration = 0.83361792[s]
X_domain       = 13C
X_freq         = 125.76529768[MHz]
X_offset       = 100[ppm]
X_points       = 32768
X_prescans     = 4
X_resolution   = 1.19959034[Hz]
X_sweep        = 39.3081761[MHz]
Irr_domain     = 1H
Irr_freq       = 500.15991521[MHz]
Irr_offset     = 5.0[ppm]
Clipped        = FALSE
Mod_return     = 1
Scans          = 300
Total_scans    = 300

X_90_width     = 13.2[us]
X_acq_time     = 0.83361792[s]
X_angle        = 30[deg]
X_atn          = 6[dB]
X_pulse        = 4.4[us]
Irr_atn_dec    = 20.7[dB]
Irr_atn_noe    = 20.7[dB]
Irr_noise      = WALTZ
Decoupling     = TRUE
Initial_wait   = 1[s]
Noe_time       = TRQE
Noe            = 2[s]
Recvr_gain     = 60
Relaxation_delay = 2[s]
Repetition_time = 2.83361792[s]
Temp_get       = 22.9[dc]
  
```

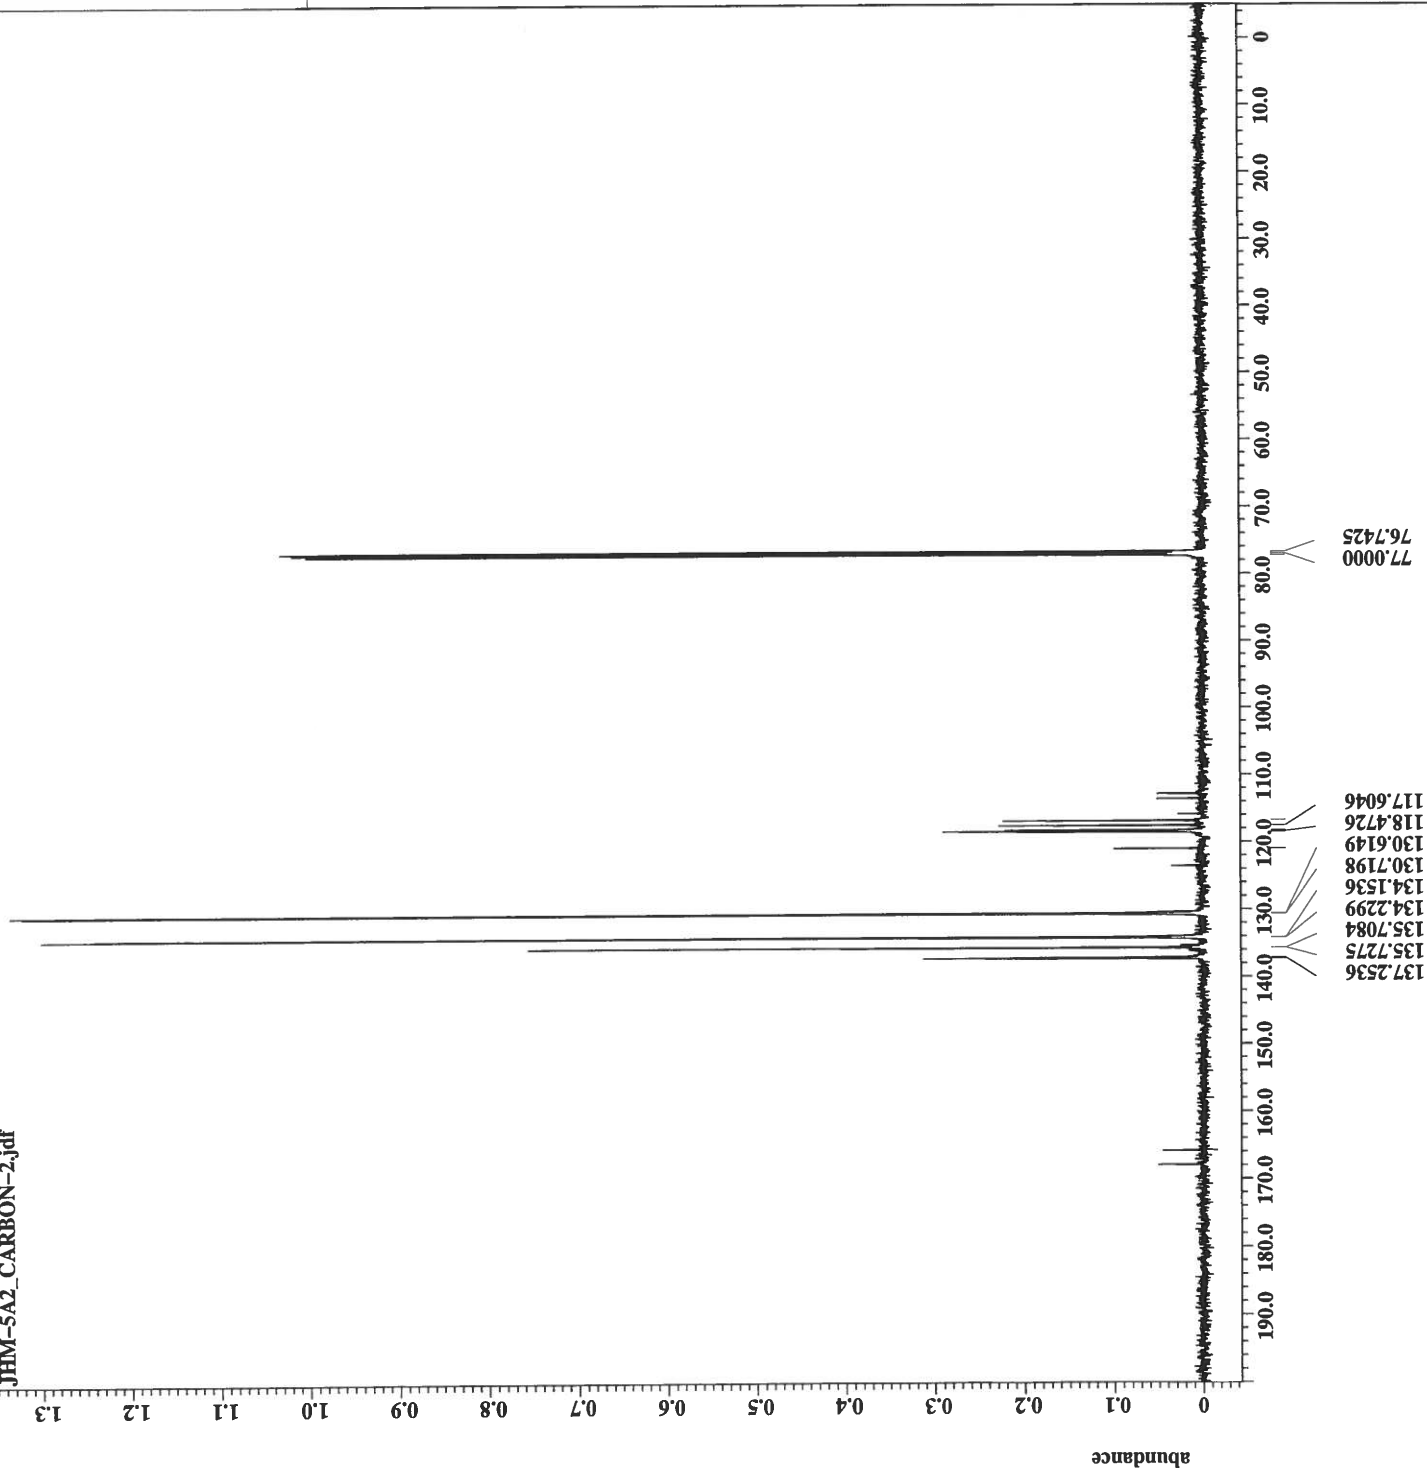

X : parts per Million : 13C



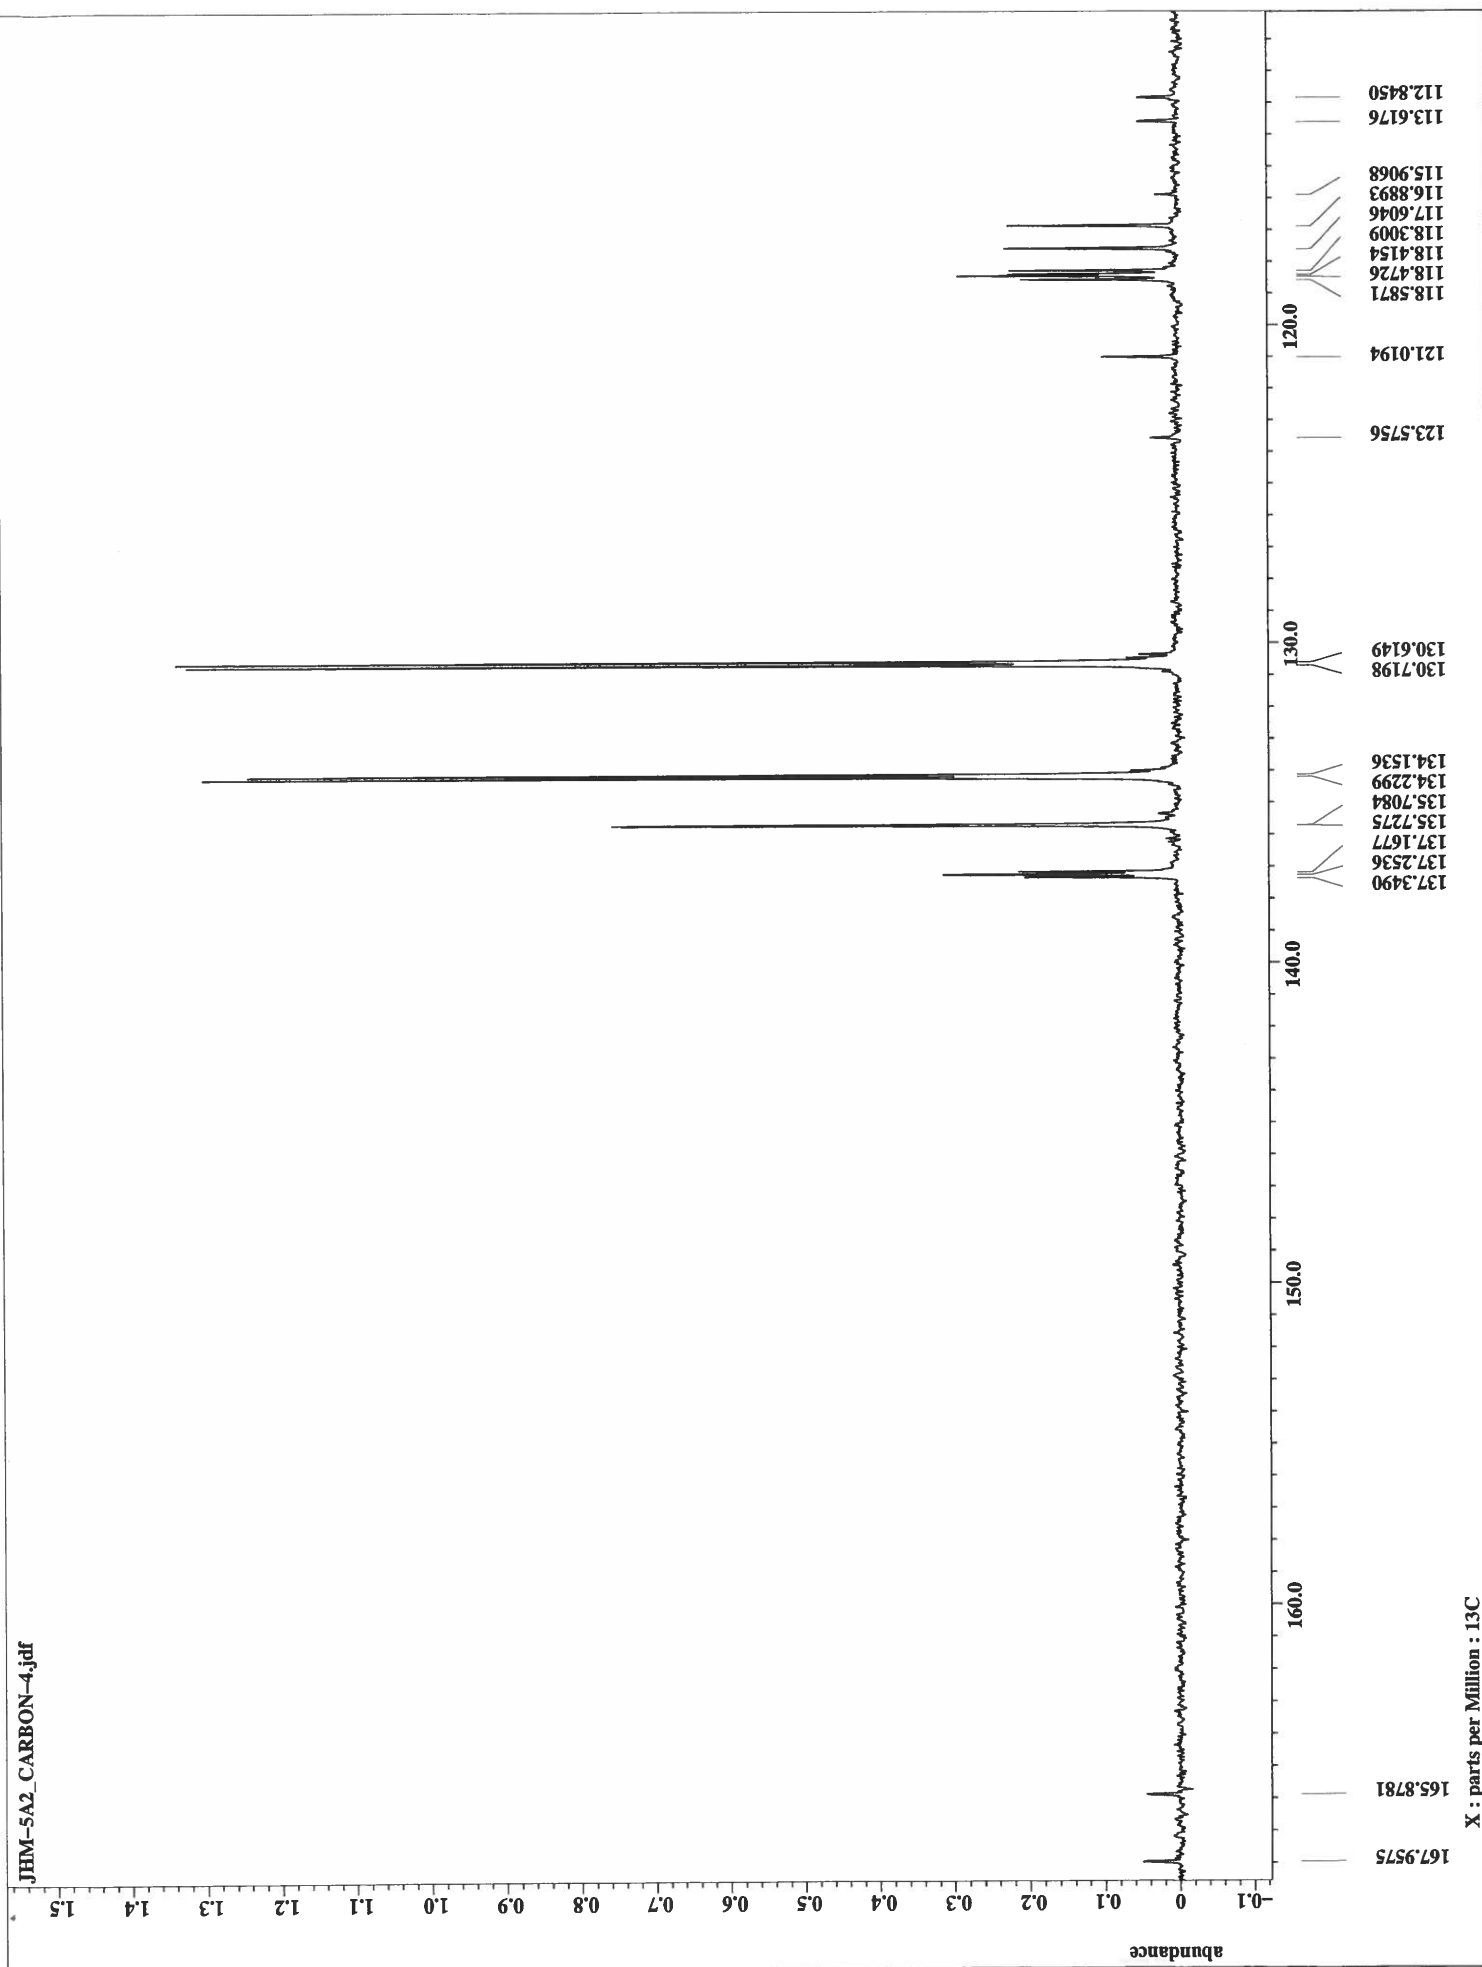

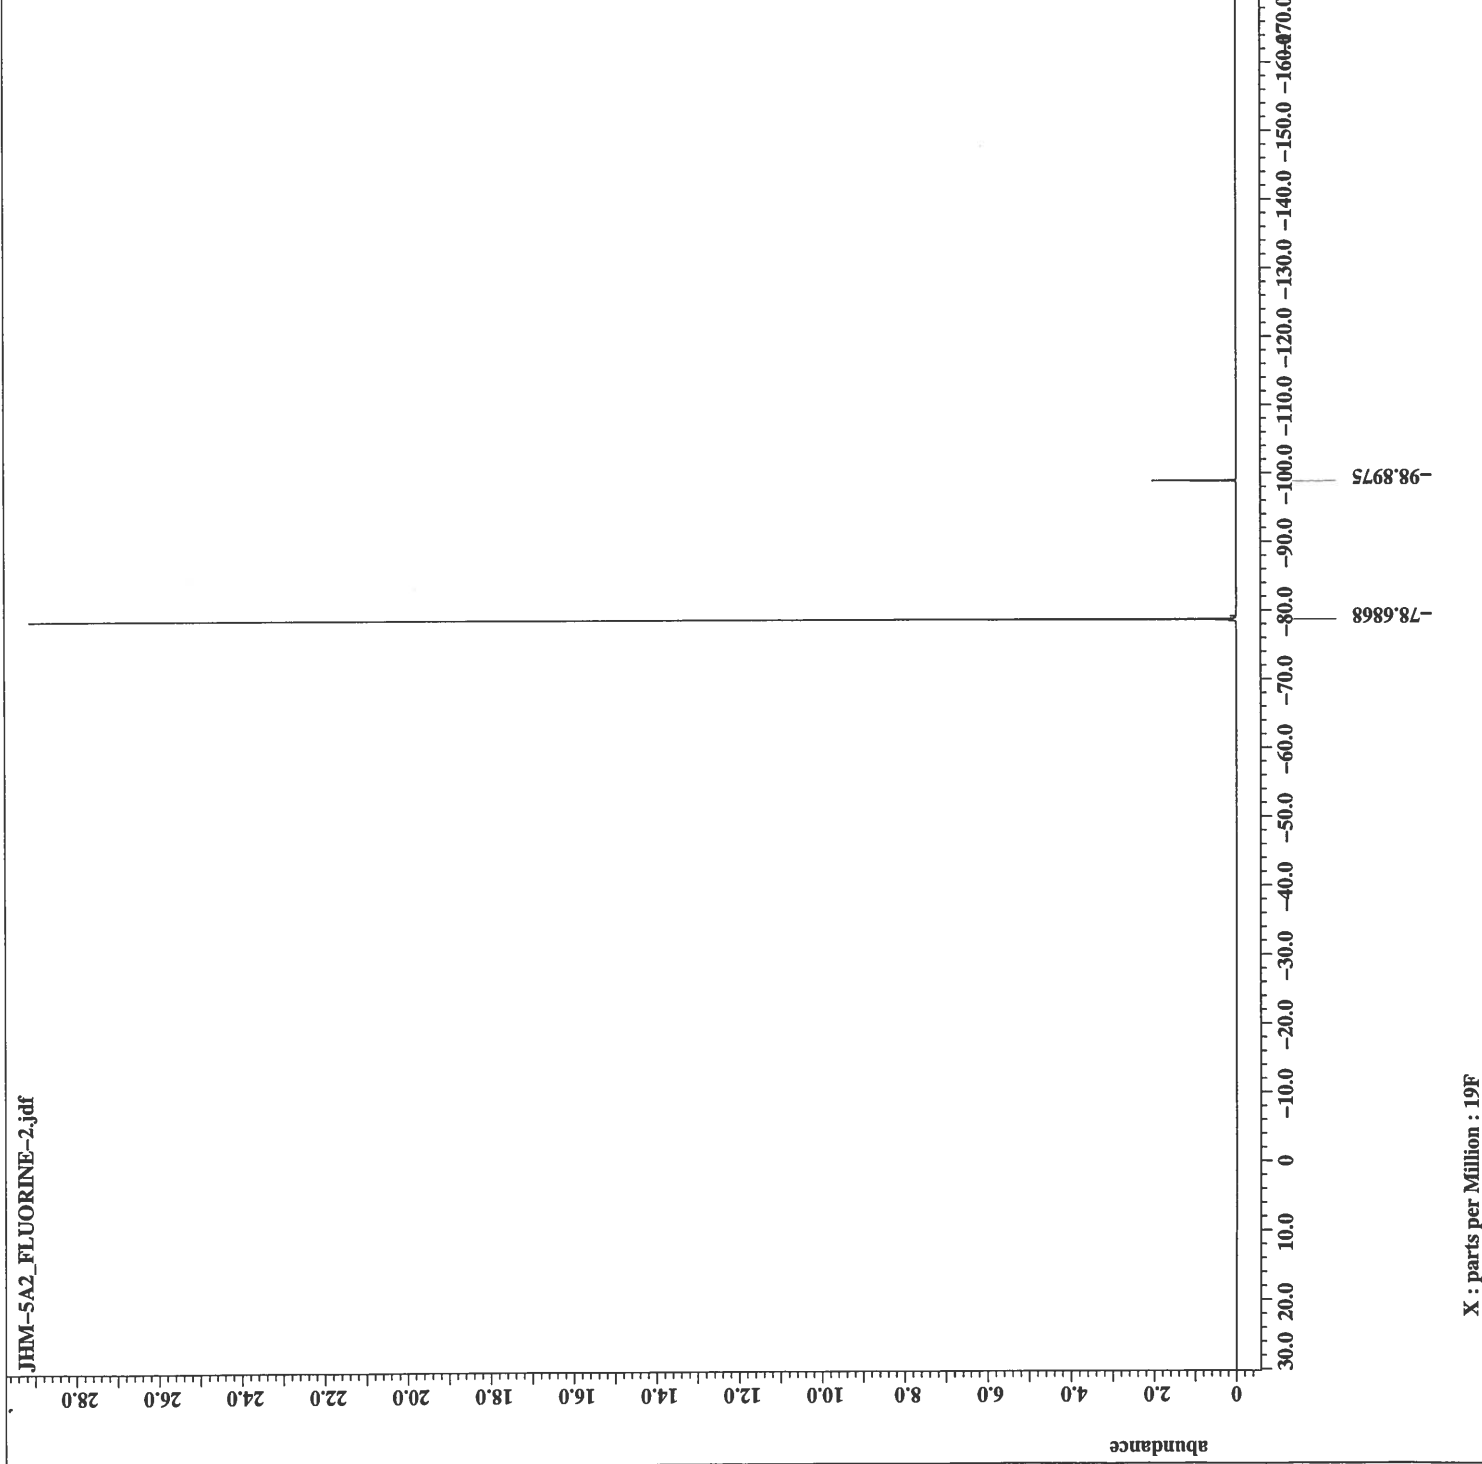

X : parts per Million : 19F

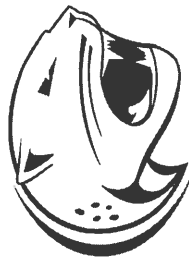**SOUTH ALABAMA**  
**JAGUARS**

Filename = JHM-5A2\_FLUORINE-2.jd  
Author = Jim Davis  
Experiment = single\_pulse.ex2  
Sample\_id = JHM-5A2  
Solvent = CHLOROFORM-D  
Changer\_sample = 11  
Creation\_time = 25-JUL-2018 18:14:32  
Revision\_time = 25-JUL-2018 17:51:07  
Current\_time = 25-JUL-2018 17:51:07  
Data\_format = 1D COMPLEX  
Dim\_size = 52428  
Dim\_title = 19F  
Dim\_units = [ppm]  
Dimensions = X  
Site = ECA 500  
Spectrometer = JNM-ECA500  
Field\_strength = 11.7473579[T] (500[MH  
X\_acq\_duration = 0.55574528[s]  
X\_domain = 19F  
X\_freq = 470.62046084[MHz]  
X\_offset = -70[ppm]  
X\_points = 65536  
X\_prescans = 1  
X\_resolution = 1.7993855[Hz]  
X\_sweep = 117.9245283[kHz]  
Irr\_domain = 19F  
Irr\_freq = 470.62046084[MHz]  
Irr\_offset = 5[ppm]  
Tri\_domain = 19F  
Tri\_freq = 470.62046084[MHz]  
Tri\_offset = 5[ppm]  
Clipped = FALSE  
Mod\_return = 1  
Scans = 16  
Total\_scans = 16  
X\_90\_width = 13.1[us]  
X\_acq\_time = 0.55574528[s]  
X\_angle = 45[deg]  
X\_atn = 2.5[db]  
X\_pulse = 6.55[us]  
Irr\_pulse = Off  
Irr\_mode = Off  
Dante\_preset = FALSE  
Initial\_wait = 1[s]  
Recvr\_gain = 38  
Relaxation\_delay = 4[s]  
Repetition\_time = 4.55574528[s]  
Temp\_get = 22.5[dc]

abundance

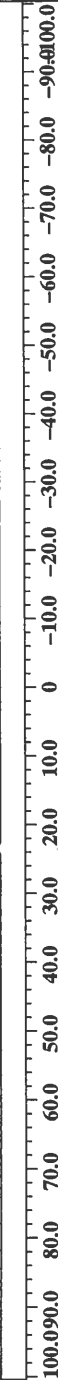

23.4899

X : parts per Million : 31P

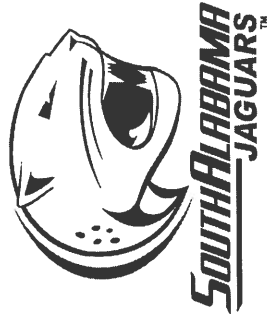

Filename = JHM-5A2\_PHOSPHORUS-2.  
Author = Jim Davis  
Experiment = single\_pulse\_dec  
Sample\_id = JHM-5A2  
Solvent = CHLOROFORM-D  
Changer\_sample = 11  
Creation\_time = 25-JUL-2018 18:38:23  
Revision\_time = 25-JUL-2018 18:14:57  
Current\_time = 25-JUL-2018 18:14:57  
Data\_format = 1D COMPLEX  
Dim\_size = 26214  
Dim\_title = 31P  
Dim\_units = [ppm]  
Dimensions = X  
Site = ECA 500  
Spectrometer = JNM-ECA500  
Field\_strength = 11.7473579[T] (500[MH  
X\_acq\_duration = 0.64487424[s]  
X\_domain = 31P  
X\_freq = 202.46831075[MHz]  
X\_offset = 0[ppm]  
X\_points = 32768  
X\_prescans = 4  
X\_resolution = 1.55068995[Hz]  
X\_sweep = 50.81300813[MHz]  
Irr\_domain = 1H  
Irr\_freq = 500.15991521[MHz]  
Irr\_offset = 5.0[ppm]  
Clipped = FALSE  
Mod\_return = 1  
Scans = 234  
Total\_scans = 234  
X\_90\_width = 14.687[us]  
X\_acq\_time = 0.64487424[s]  
X\_angle = 30[deg]  
X\_atn = 5[db]  
X\_pulse = 4.89566667[us]  
Irr\_atn\_dec = 20.7[db]  
Irr\_atn\_noe = 20.7[db]  
Irr\_noise = WALTZ  
Decoupling = TRUE  
Initial\_wait = 1[s]  
Noe = TRUE  
Noe\_time = 2[s]  
Recvr\_gain = 56  
Relaxation\_delay = 2[s]  
Repetition\_time = 2.64487424[s]  
Temp\_set = 22.8[dc]

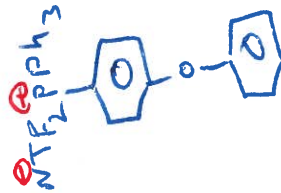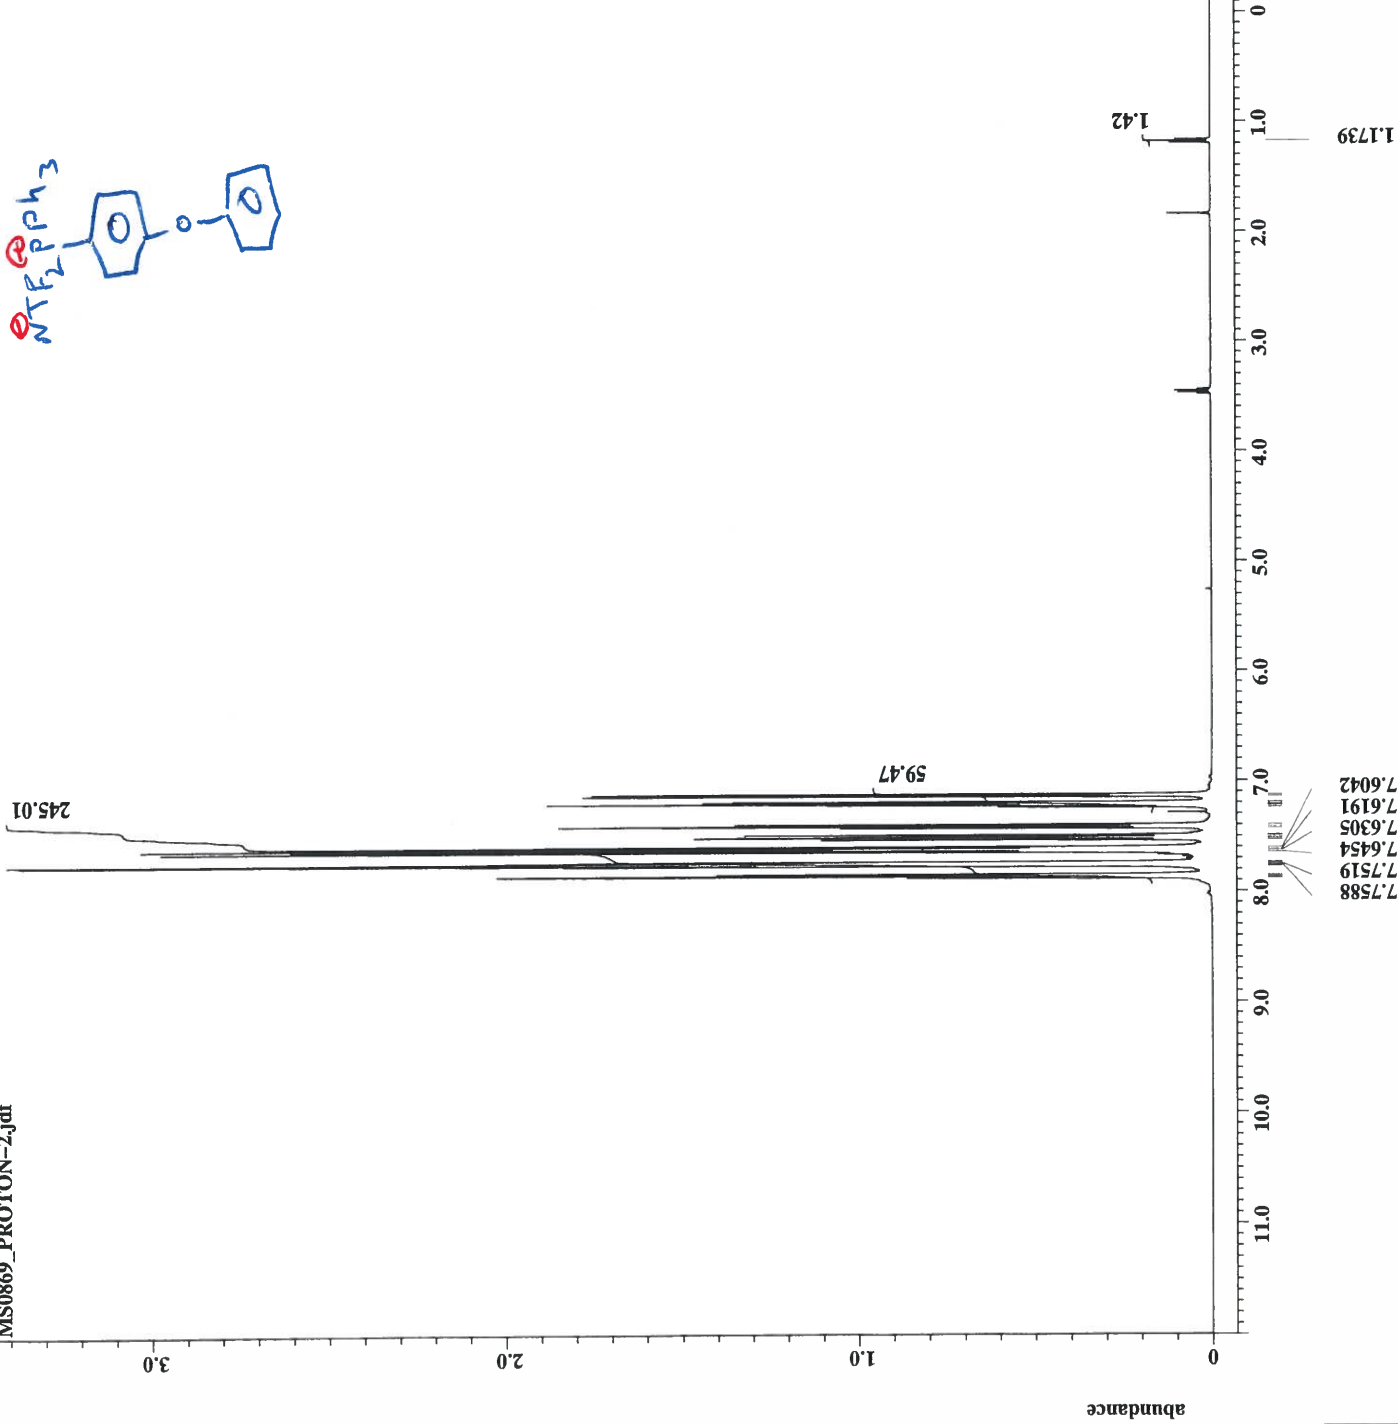

X : parts per Million : 1H

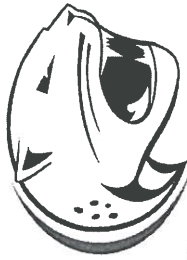

**SOUTH ALABAMA**  
**JAGUARS**

```

Filename      = MS0869_PROTON-2.jdf
Author        = Jim Davis
Experiment     = single_pulse.ex2
Sample_id     = MS0869
Solvent       = CHLOROFORM-D
Creation_time  = 26-NOV-2019 11:19:03
Revision_time  = 26-NOV-2019 10:49:59
Current_time   = 26-NOV-2019 10:49:59

Data_format   = 1D COMPLEX
Dim_size      = 13107
Dim_title     = 1H
Dim_units     = [ppm]
Dimensions    = X
Site          = ECA 500
Spectrometer  = JNM-ECA500

Field_strength = 11.7473579[T] (500[MH
X_acq_duration = 1.74587904[s]
X_domain      = 1H
X_freq        = 500.15991521[MHz]
X_offset      = 5.0[ppm]
X_points      = 16384
X_prescans    = 1
X_resolution  = 0.5727737[Hz]
X_sweep       = 9.38438438[KHz]
Irr_domain    = 1H
Irr_freq      = 500.15991521[MHz]
Irr_offset    = 5.0[ppm]
Tri_domain    = 1H
Tri_freq      = 500.15991521[MHz]
Tri_offset    = 5.0[ppm]
Clipped       = FALSE
Mod_return    = 1
Scans         = 16
Total_scans   = 16

X_90_width    = 11.3[us]
X_acq_time    = 1.74587904[s]
X_angle       = 45[deg]
X_atn         = 4[db]
X_pulse       = 5.65[us]
Irr_mode      = Off
Tri_mode      = Off
Dante_preset  = FALSE
Initial_wait  = 1[s]
Recvr_gain    = 20
Relaxation_delay = 4[s]
Repetition_time = 5.74587904[s]
Temp_get      = 19.3[dc]
  
```

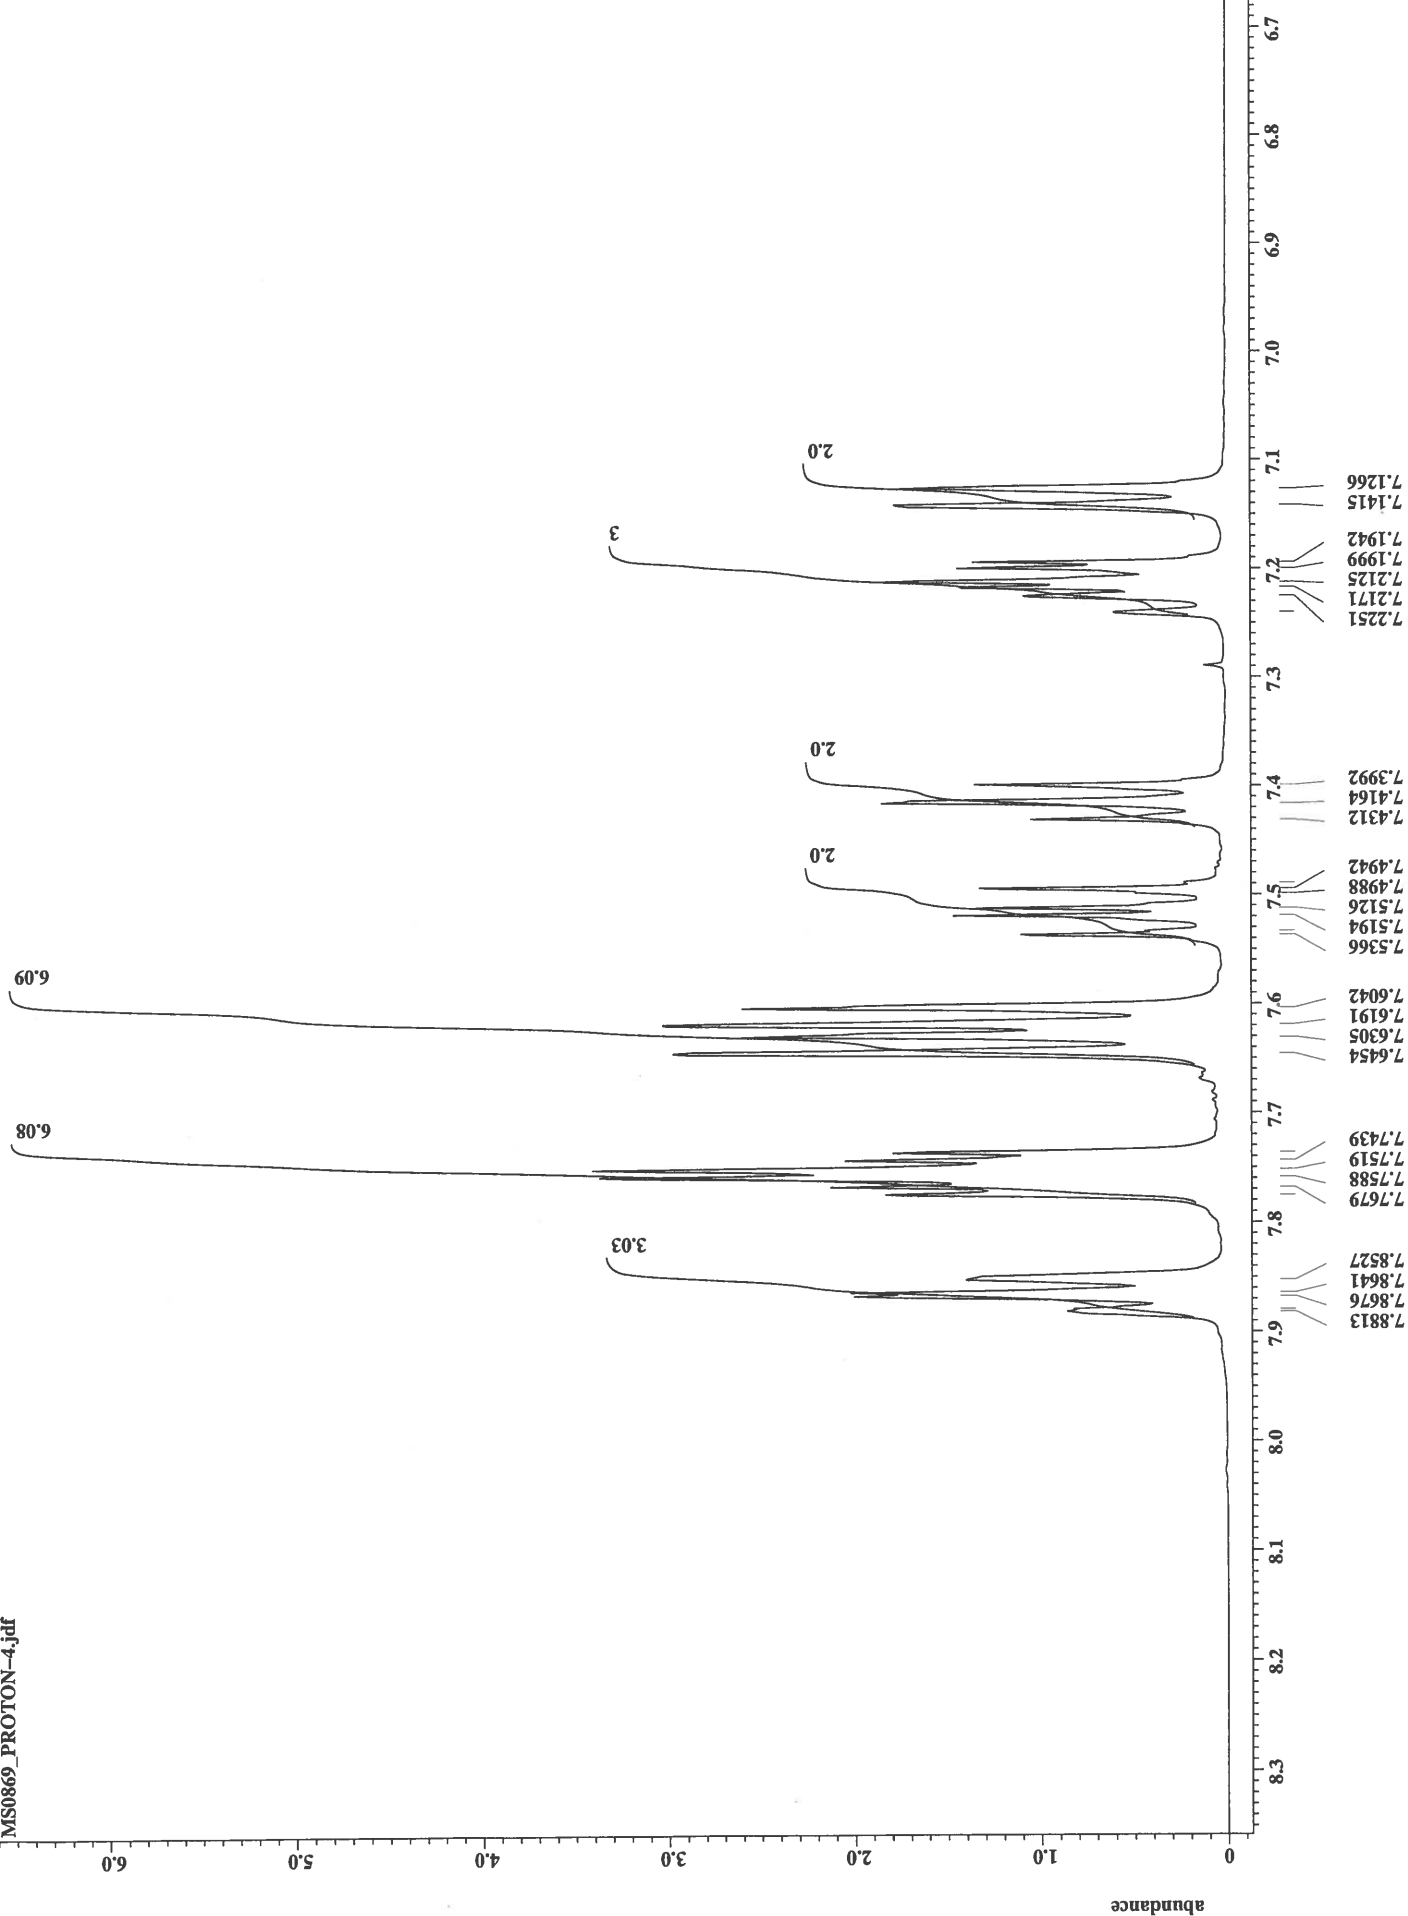

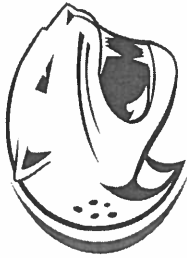

**SOUTH ALABAMA**  
**JAGUARS**™

```

Filename = MS0869_CARBON-2.jdf
Author   = Jim Davis
Experiment = single_pulse_dec
Sample_id = MS0869
Solvent   = CHLOROFORM-D
Creation_time = 26-NOV-2019 11:56:57
Revision_time = 26-NOV-2019 11:27:52
Current_time = 26-NOV-2019 11:27:53

Data_format = 1D COMPLEX
Dim_size    = 26214
Dim_title   = 13C
Dim_units   = [ppm]
Dimensions  = X
Site        = ECA 500
Spectrometer = JNM-ECA500

Field_strength = 11.7473579[T] (500[MH
X_acq_duration = 0.83361792[s]
X_domain       = 13C
X_freq         = 125.76529768[MHz]
X_offset       = 100[ppm]
X_points       = 32768
X_prescans     = 4
X_resolution   = 1.19959034[Hz]
X_sweep        = 39.3081761[KHz]
Irr_domain     = 1H
Irr_freq       = 500.15991521[MHz]
Irr_offset     = 5.0[ppm]
Clipped        = FALSE
Mod_return     = 1
Scans          = 449
Total_scans    = 449

X_90_width     = 13[us]
X_acq_time     = 0.83361792[s]
X_angle        = 30[deg]
X_atn          = 6[db]
X_pulse        = 4.333333333[us]
Irr_atn_dec    = 21.2[db]
Irr_atn_noe    = 21.2[db]
Irr_noise      = WALTZ
Decoupling     = TRUE
Initial_wait   = 1[s]
Noe            = TRUE
Noe_time       = 2[s]
Recvr_gain     = 60
Relaxation_delay = 2[s]
Repetition_time = 2.83361792[s]
Temp_get       = 18.8[dc]
  
```

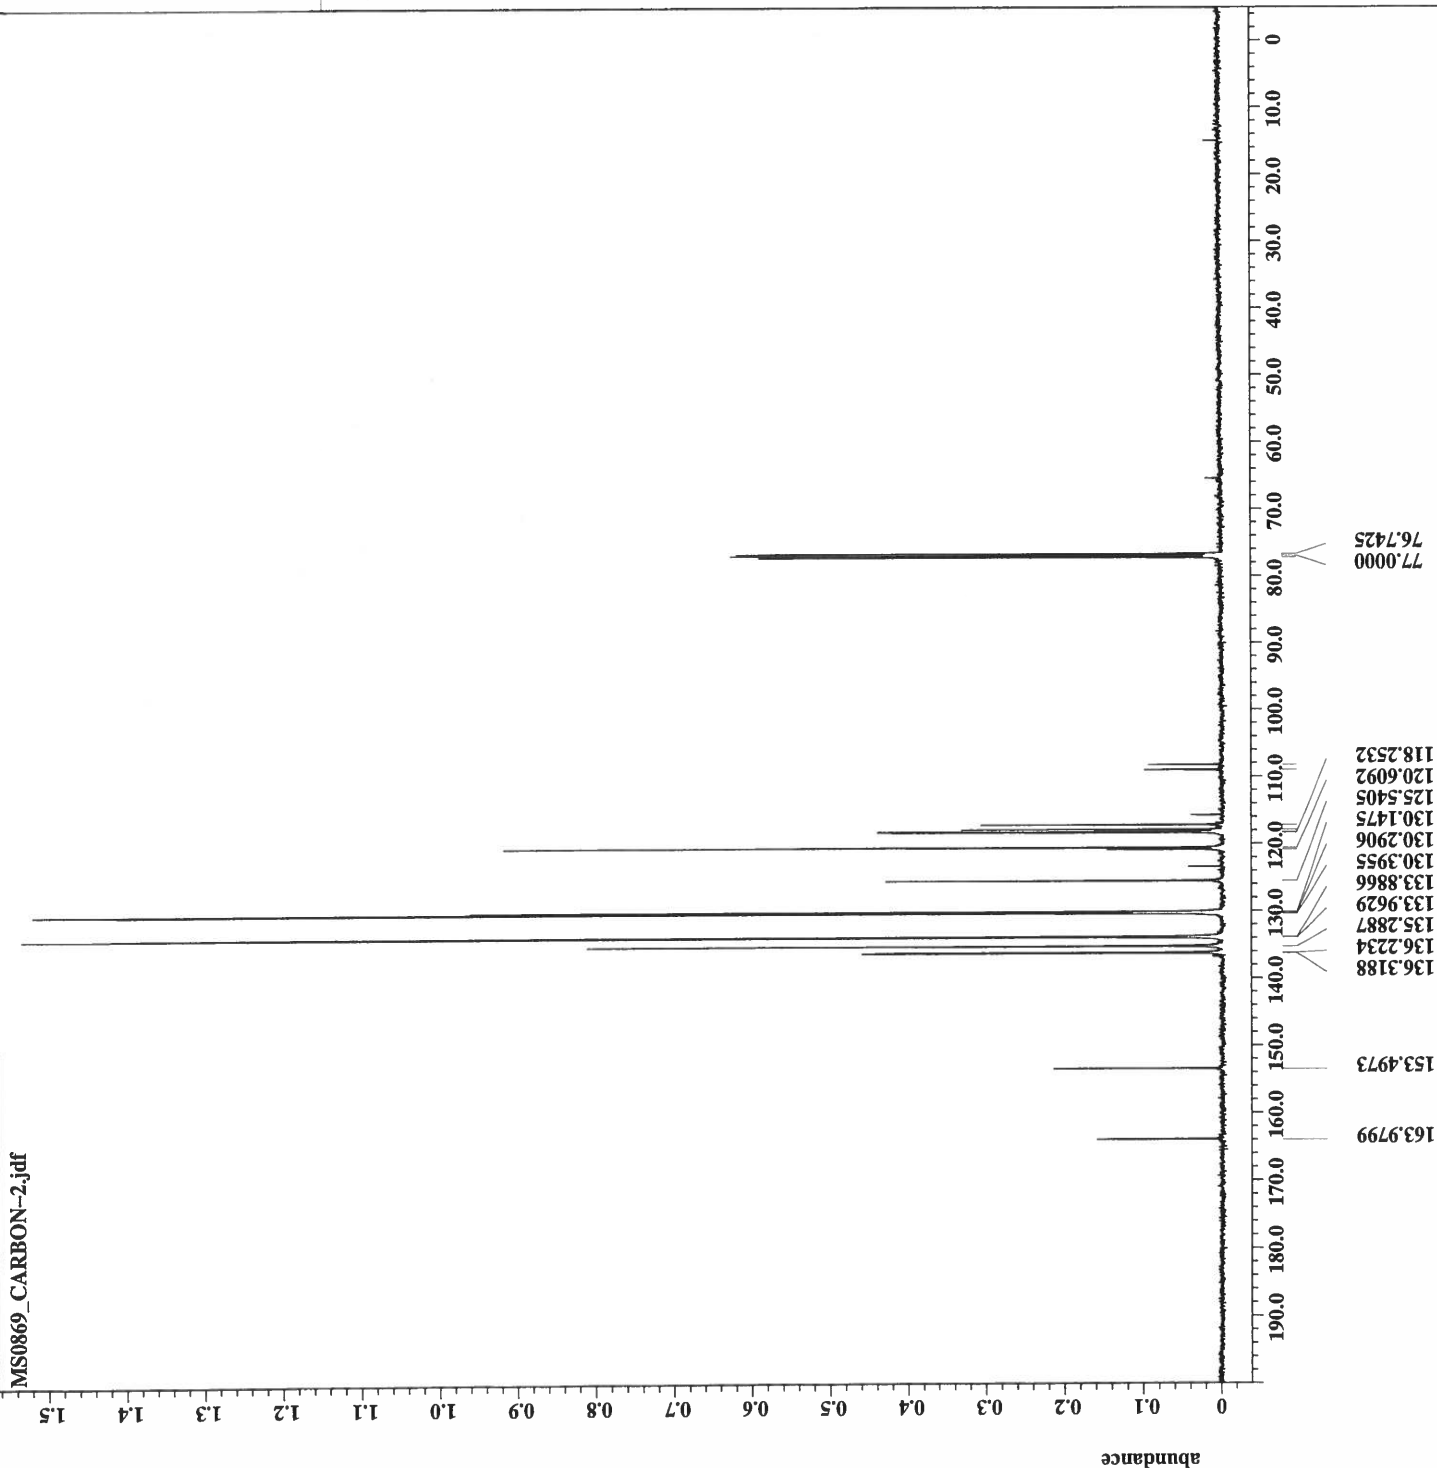

X : parts per Million : 13C

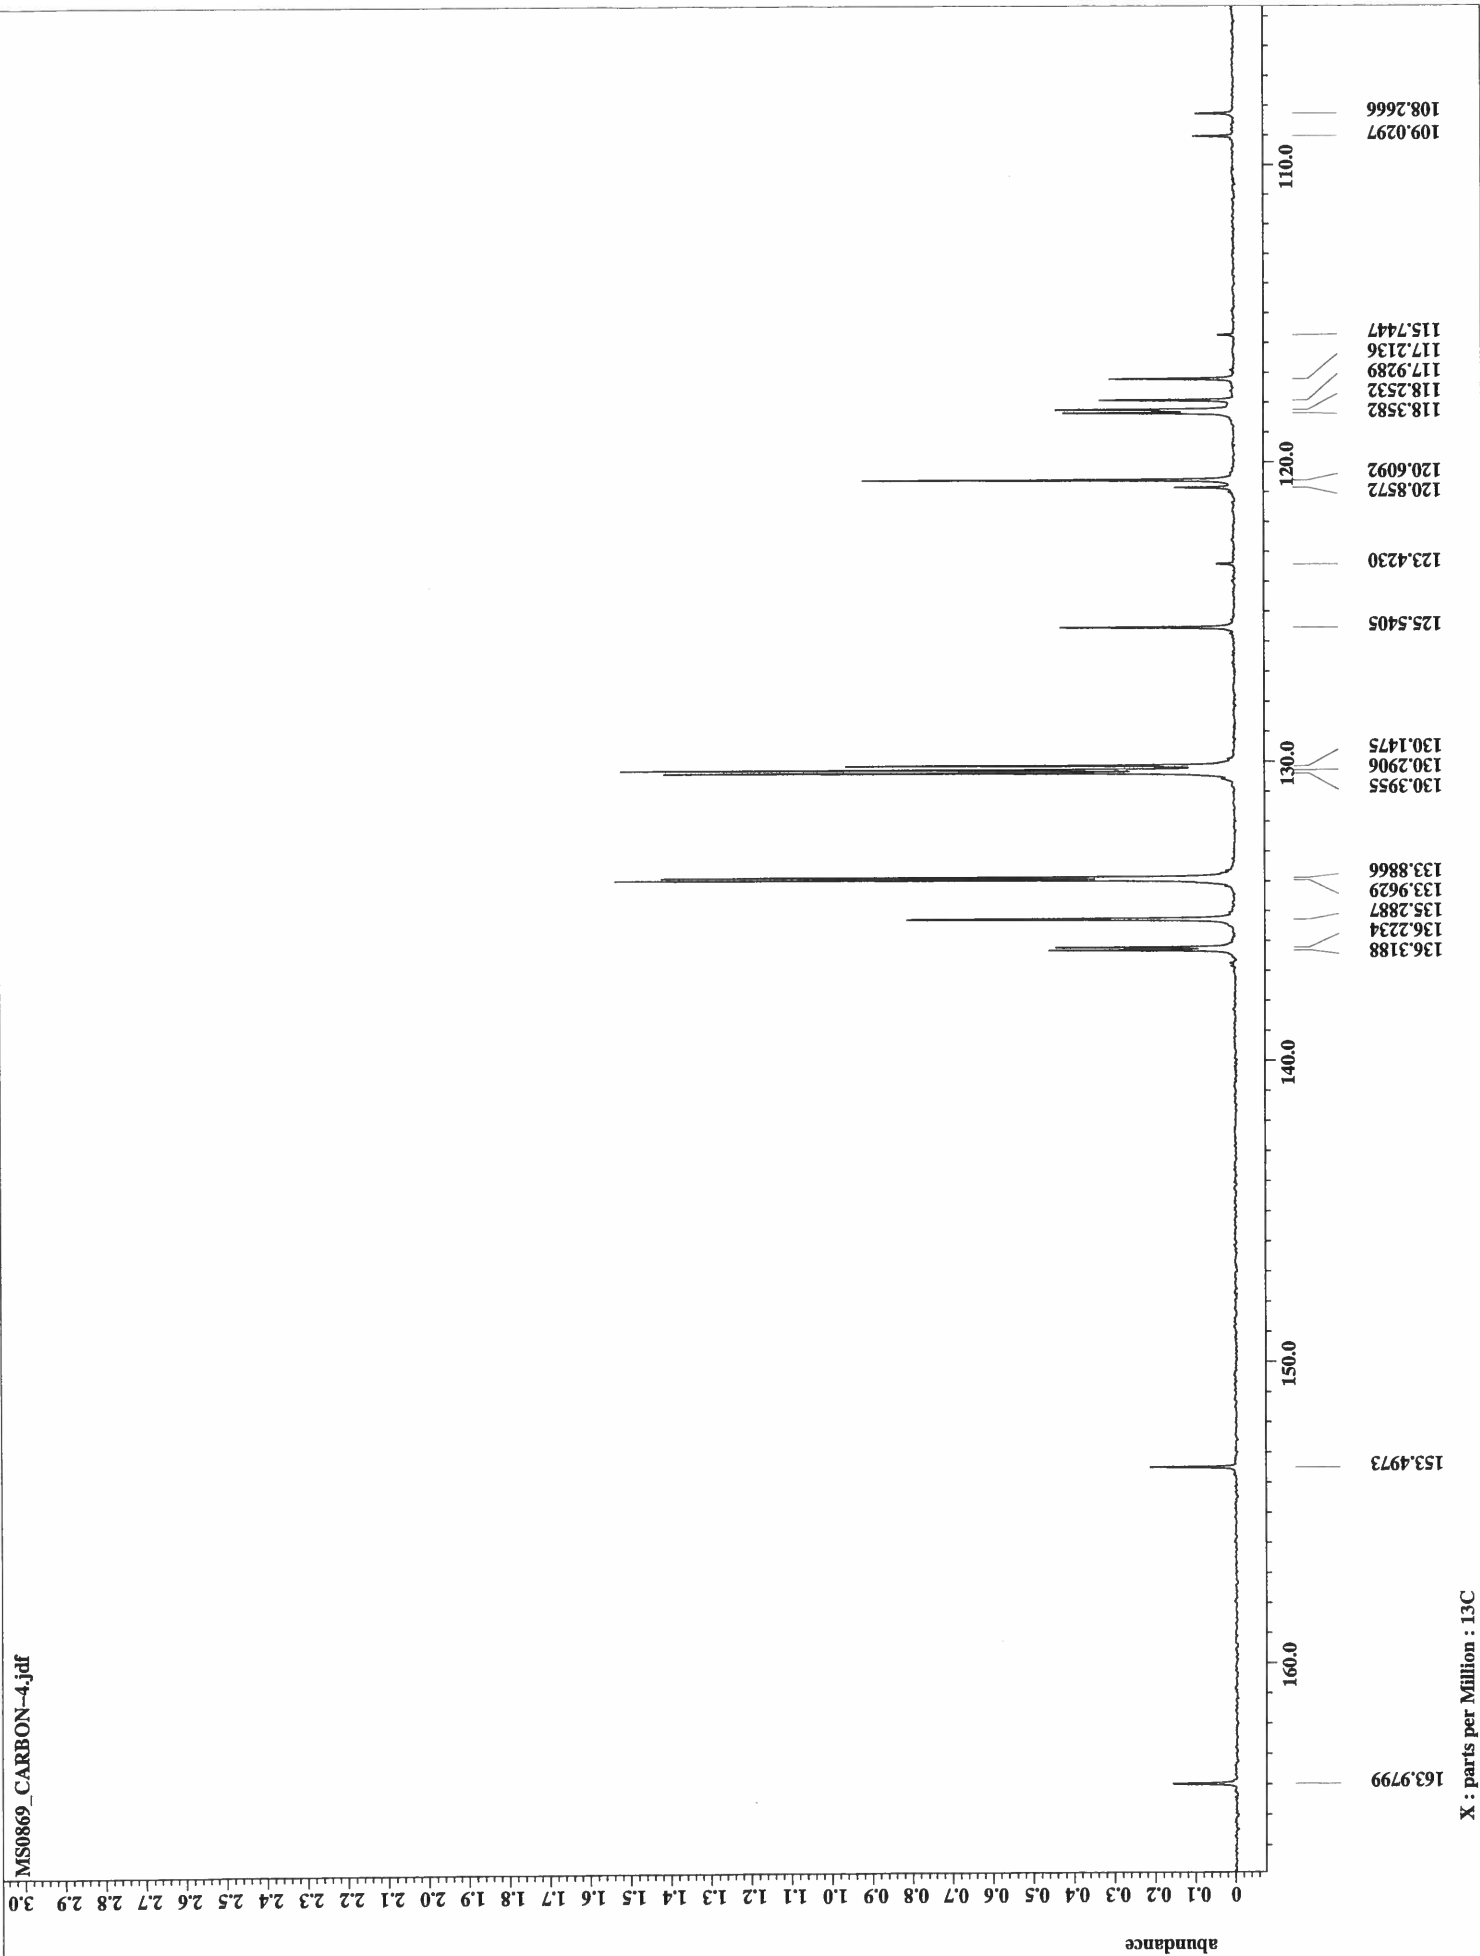



30.0

20.0

10.0

0

abundance

50.0 40.0 30.0 20.0 10.0 0 -10.0 -20.0 -30.0 -40.0 -50.0 -60.0 -70.0 -80.0 -90.0 -100.0 -110.0 -120.0 -130.0 -140.0 -150.0 -160.0 -170.0 -180.0 -190.0 -200.0 -210.0 -220.0 -230.0 -240.0 250.0

-78.8181

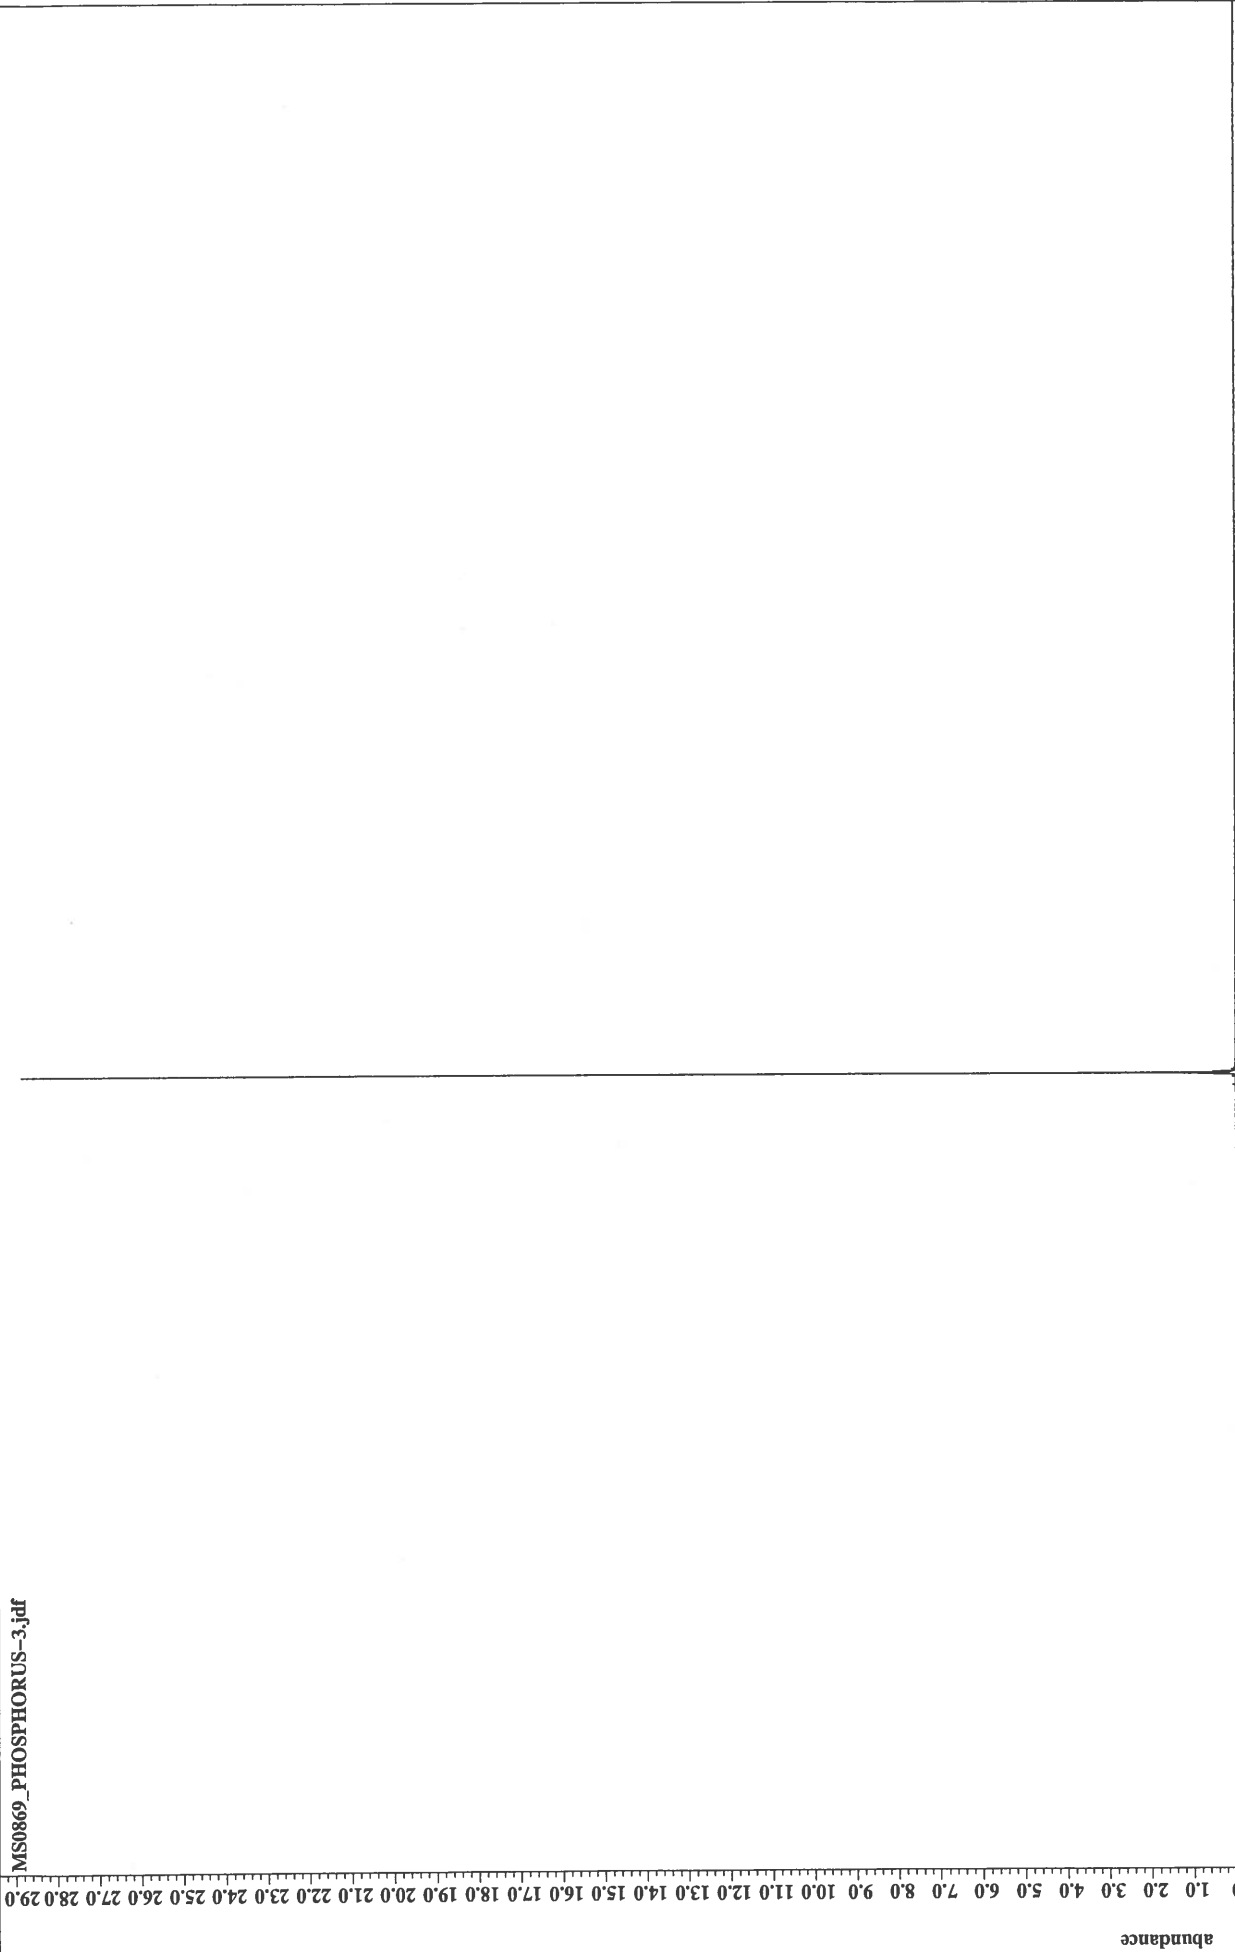

23.1204

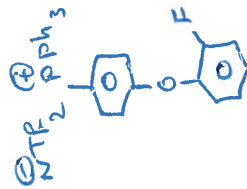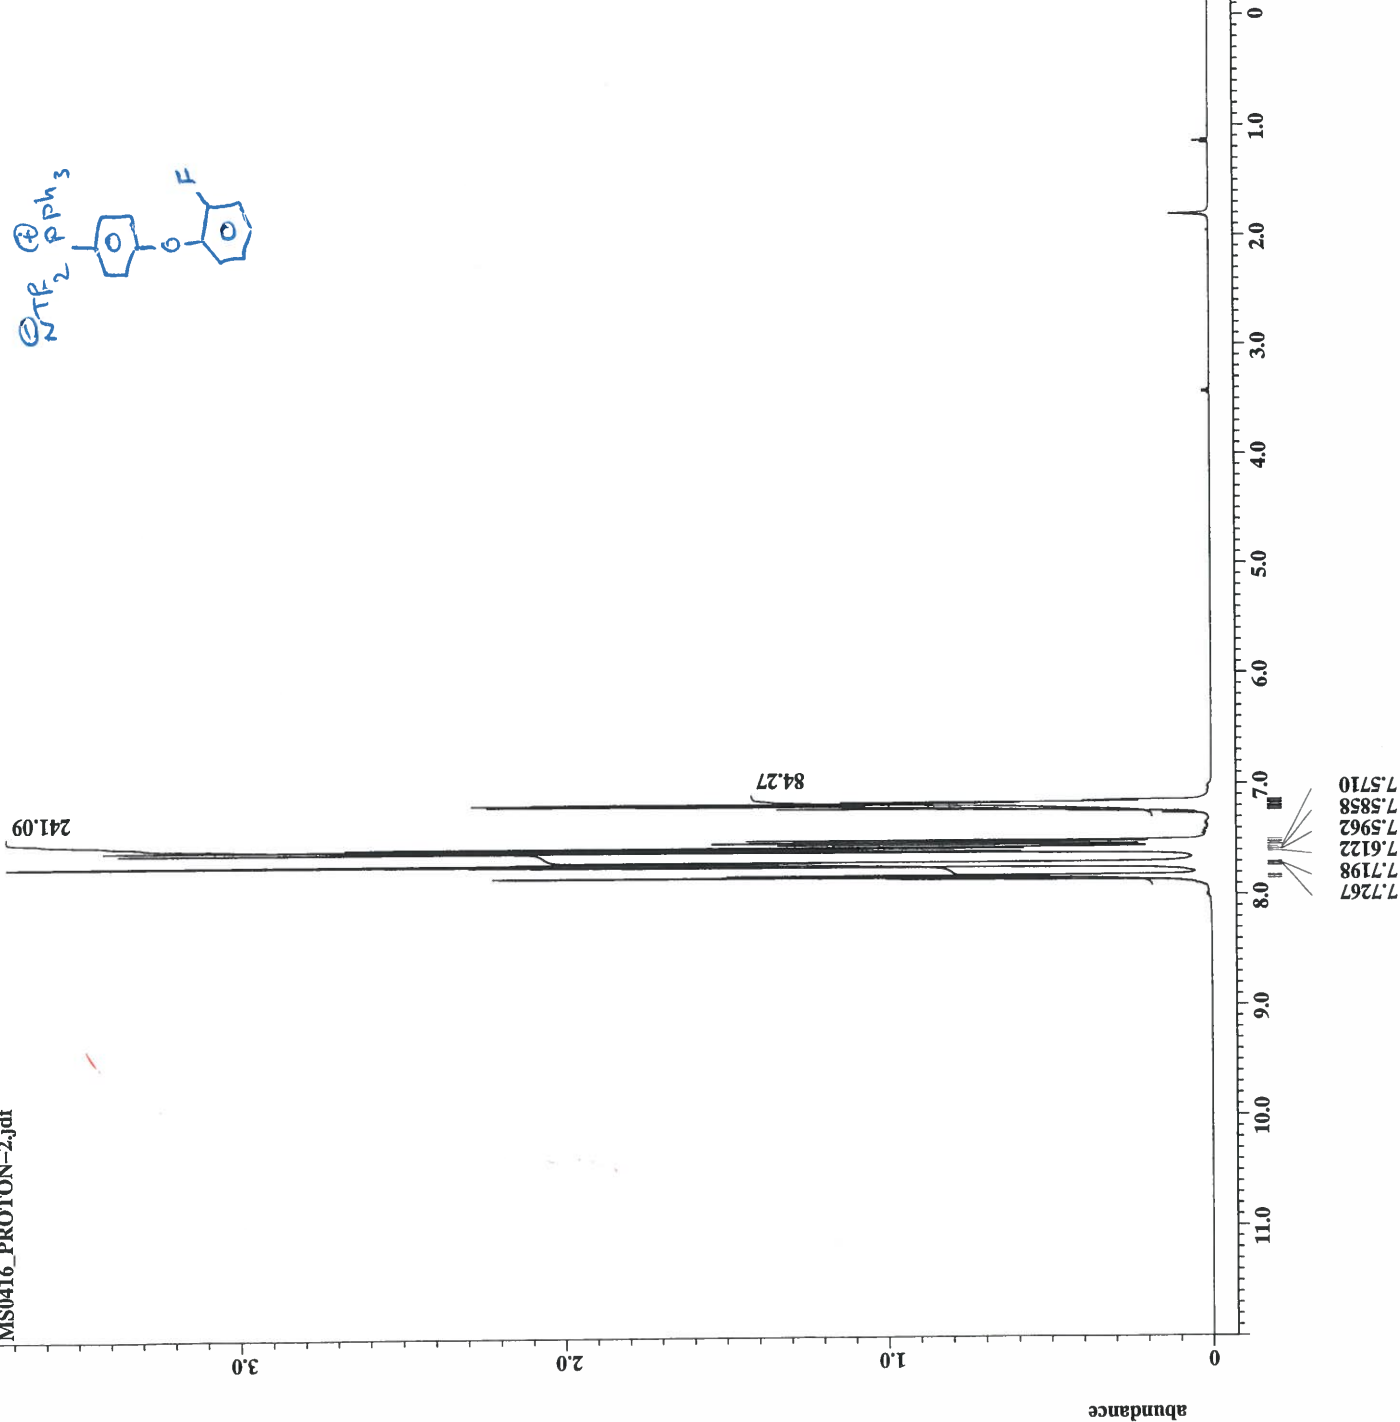

X : parts per Million : 1H

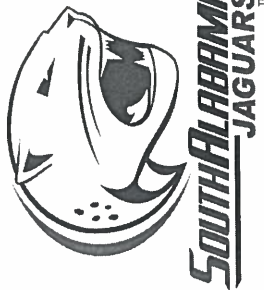

```

Filename      = MS0416_PROTON-2.jdf
Author       = Jim Davis
Experiment   = single_pulse.ex2
Sample_id    = MS0416
Solvent      = CHLOROFORM-D
Changer_sample
Creation_time = 14-APR-2018 11:32:37
Revision_time = 14-APR-2018 11:10:44
Current_time  = 14-APR-2018 11:10:44

Data_format  = 1D COMPLEX
Dim_size     = 13107
Dim_title    = 1H
Dim_units    = [ppm]
Dimensions   = X
Site         = ECA 500
Spectrometer = JNM-ECA500

Field_strength = 11.7473579[T] (500[MH
X_acq_duration = 1.74587904[s]
X_domain       = 1H
X_freq         = 500.15991521[MHz]
X_offset       = 5.0[ppm]
X_points       = 16384
X_prescans     = 1
X_resolution   = 0.57277737[Hz]
X_sweep        = 9.38438438[kHz]
Irr_domain     = 1H
Irr_freq       = 500.15991521[MHz]
Irr_offset     = 5.0[ppm]
Tri_domain     = 1H
Tri_freq       = 500.15991521[MHz]
Tri_offset     = 5.0[ppm]
Clipped        = FALSE
Mod_return     = 1
Scans          = 16
Total_scans    = 16

X_90_width     = 12.4[us]
X_acq_time      = 1.74587904[s]
X_angle         = 45[deg]
X_atn           = 4[db]
X_pulse         = 6.2[us]
Irr_mode        = Off
Tri_mode        = Off
Dante_preset    = FALSE
Initial_wait    = 1[s]
Recvr_gain      = 24
Relaxation_delay = 4[s]
Repetition_time = 5.74587904[s]
Temp_get        = 22.8[dc]
  
```

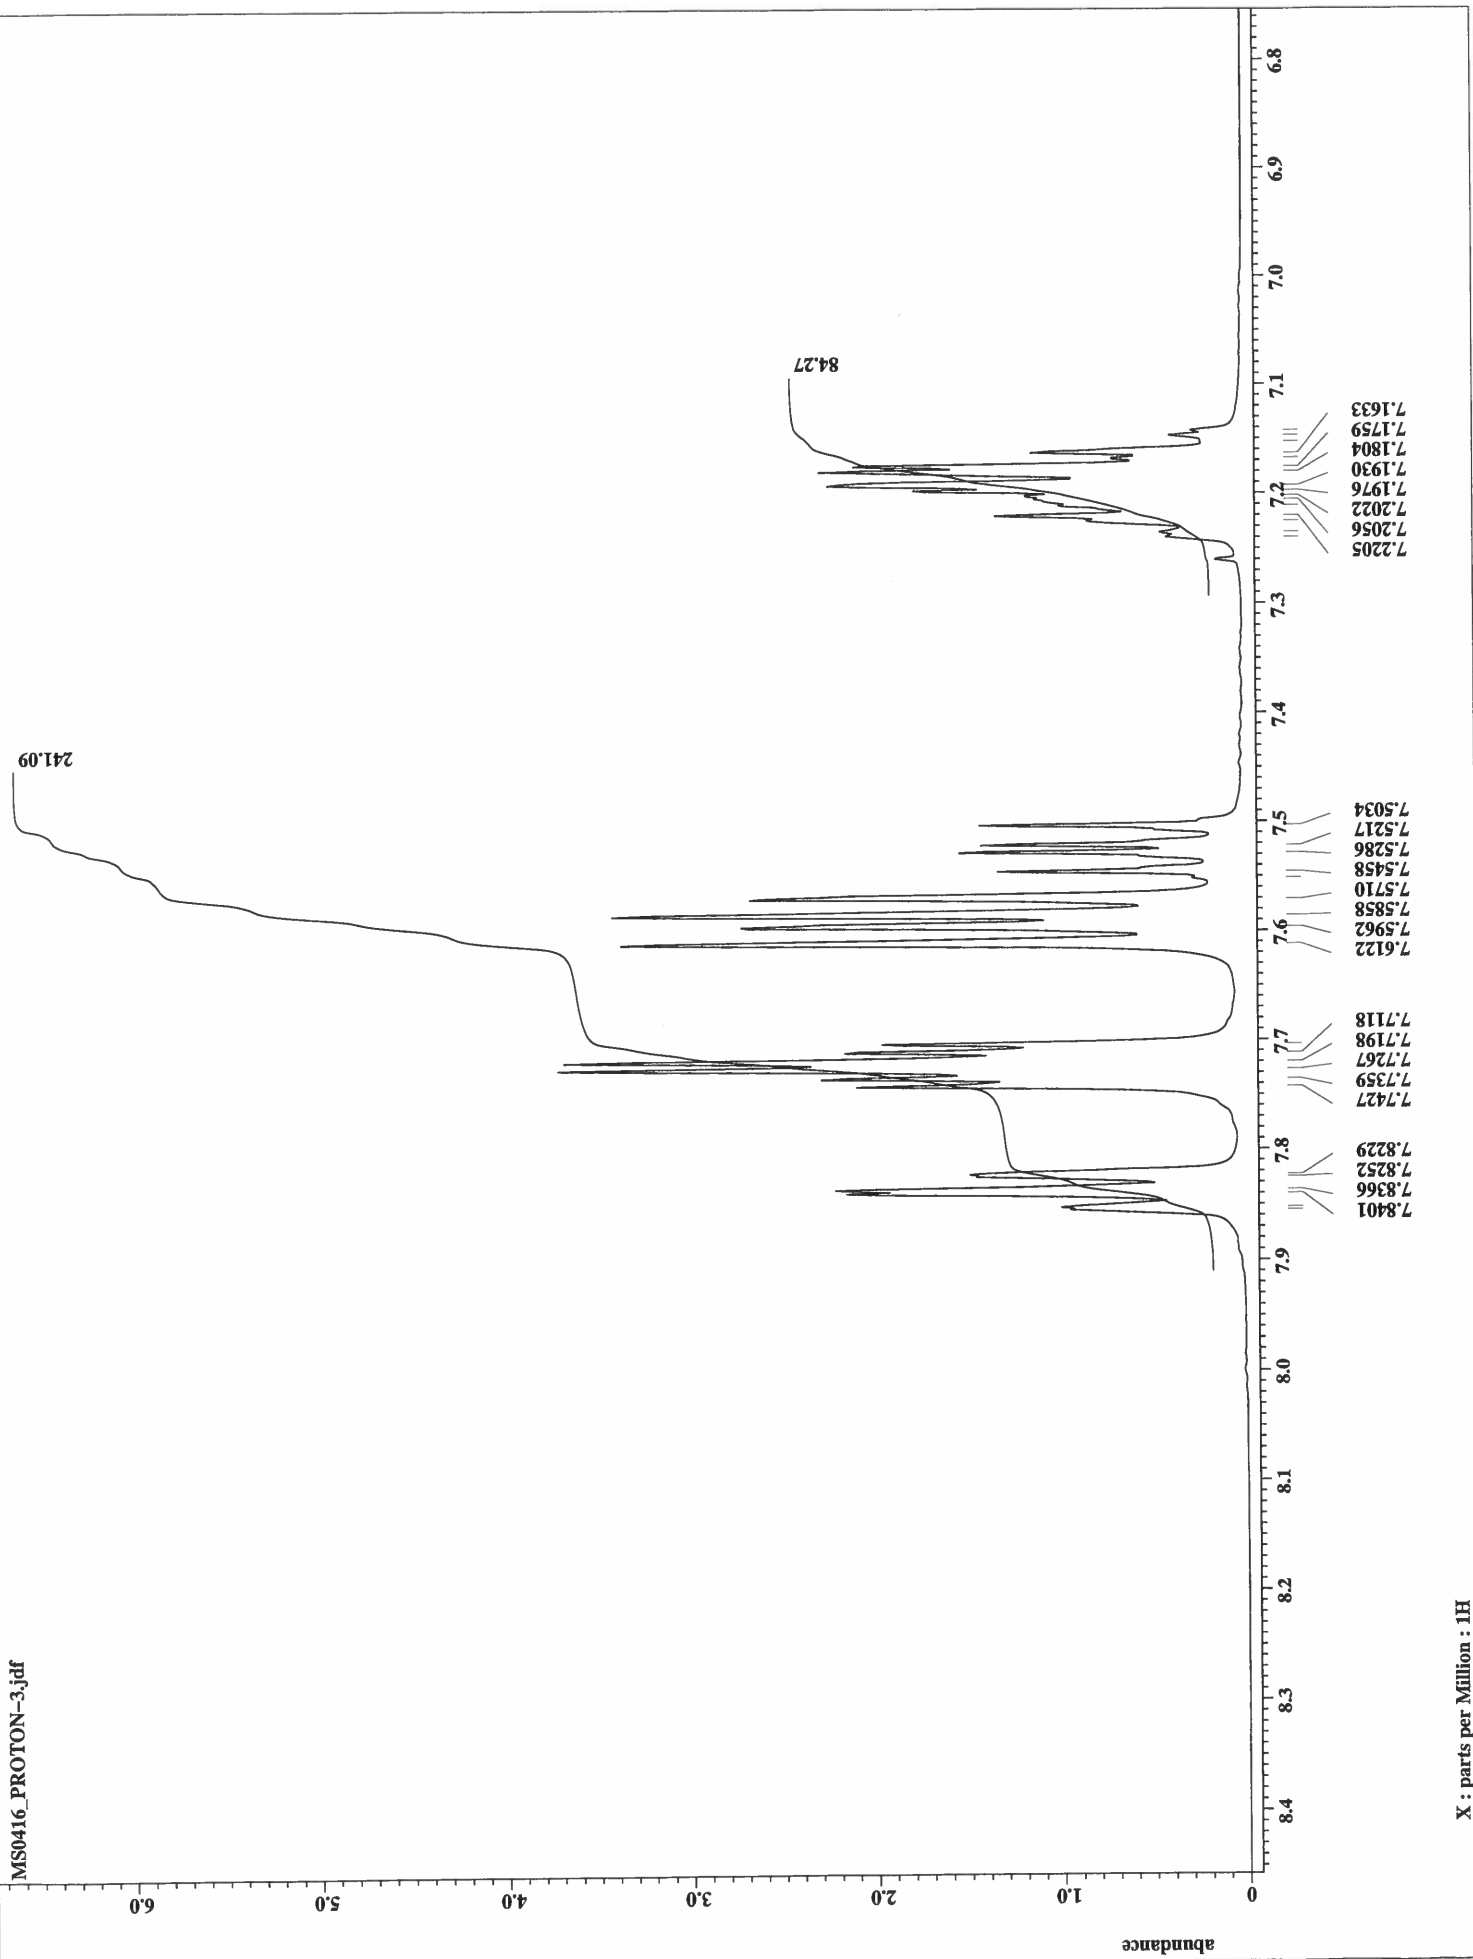

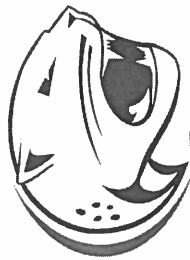

**SOUTH ALABAMA**  
**JAGUARS**

```

Filename      = MS0416_CARBON-2.jdf
Author       = Jim Davis
Experiment   = single_pulse_dec
Sample_id    = MS0416
Solvent      = CHLOROFORM-D
Changer_sample
Creation_time = 14-APR-2018 11:47:07
Revision_time = 14-APR-2018 11:25:15
Current_time  = 14-APR-2018 11:25:15

Data_format  = 1D COMPLEX
Dim_size     = 26214
Dim_title    = 13C
Dim_units    = [ppm]
Dimensions   = X
Site         = ECA 500
Spectrometer = JNM-ECA500

Field_strength = 11.7473579[T] (500[MH
X_acq_duration = 0.83361792[s]
X_domain       = 13C
X_freq         = 125.76529768[MHz]
X_offset       = 100[ppm]
X_points       = 32768
X_prescans     = 4
X_resolution   = 1.19959034[Hz]
X_sweep        = 39.3081761[KHz]
Irr_domain     = 1H
Irr_freq       = 500.15991521[MHz]
Irr_offset     = 5.0[ppm]
Clipped        = FALSE
Mod_return     = 1
Scans          = 256
Total_scans    = 256

X_90_width     = 13.2[us]
X_acq_time     = 0.83361792[s]
X_angle        = 30[deg]
X_atn          = 6[dB]
X_pulse        = 4.4[us]
Irr_atn_dec    = 20.7[dB]
Irr_atn_noe    = 20.7[dB]
Irr_noise      = WALTZ
Decoupling     = TRUE
Initial_wait   = 1[s]
Noe            = TRUE
Noe_time       = 2[s]
Recvr_gain     = 60
Relaxation_delay = 2[s]
Repetition_time = 2.83361792[s]
Temp_get       = 23.2[dc]
  
```

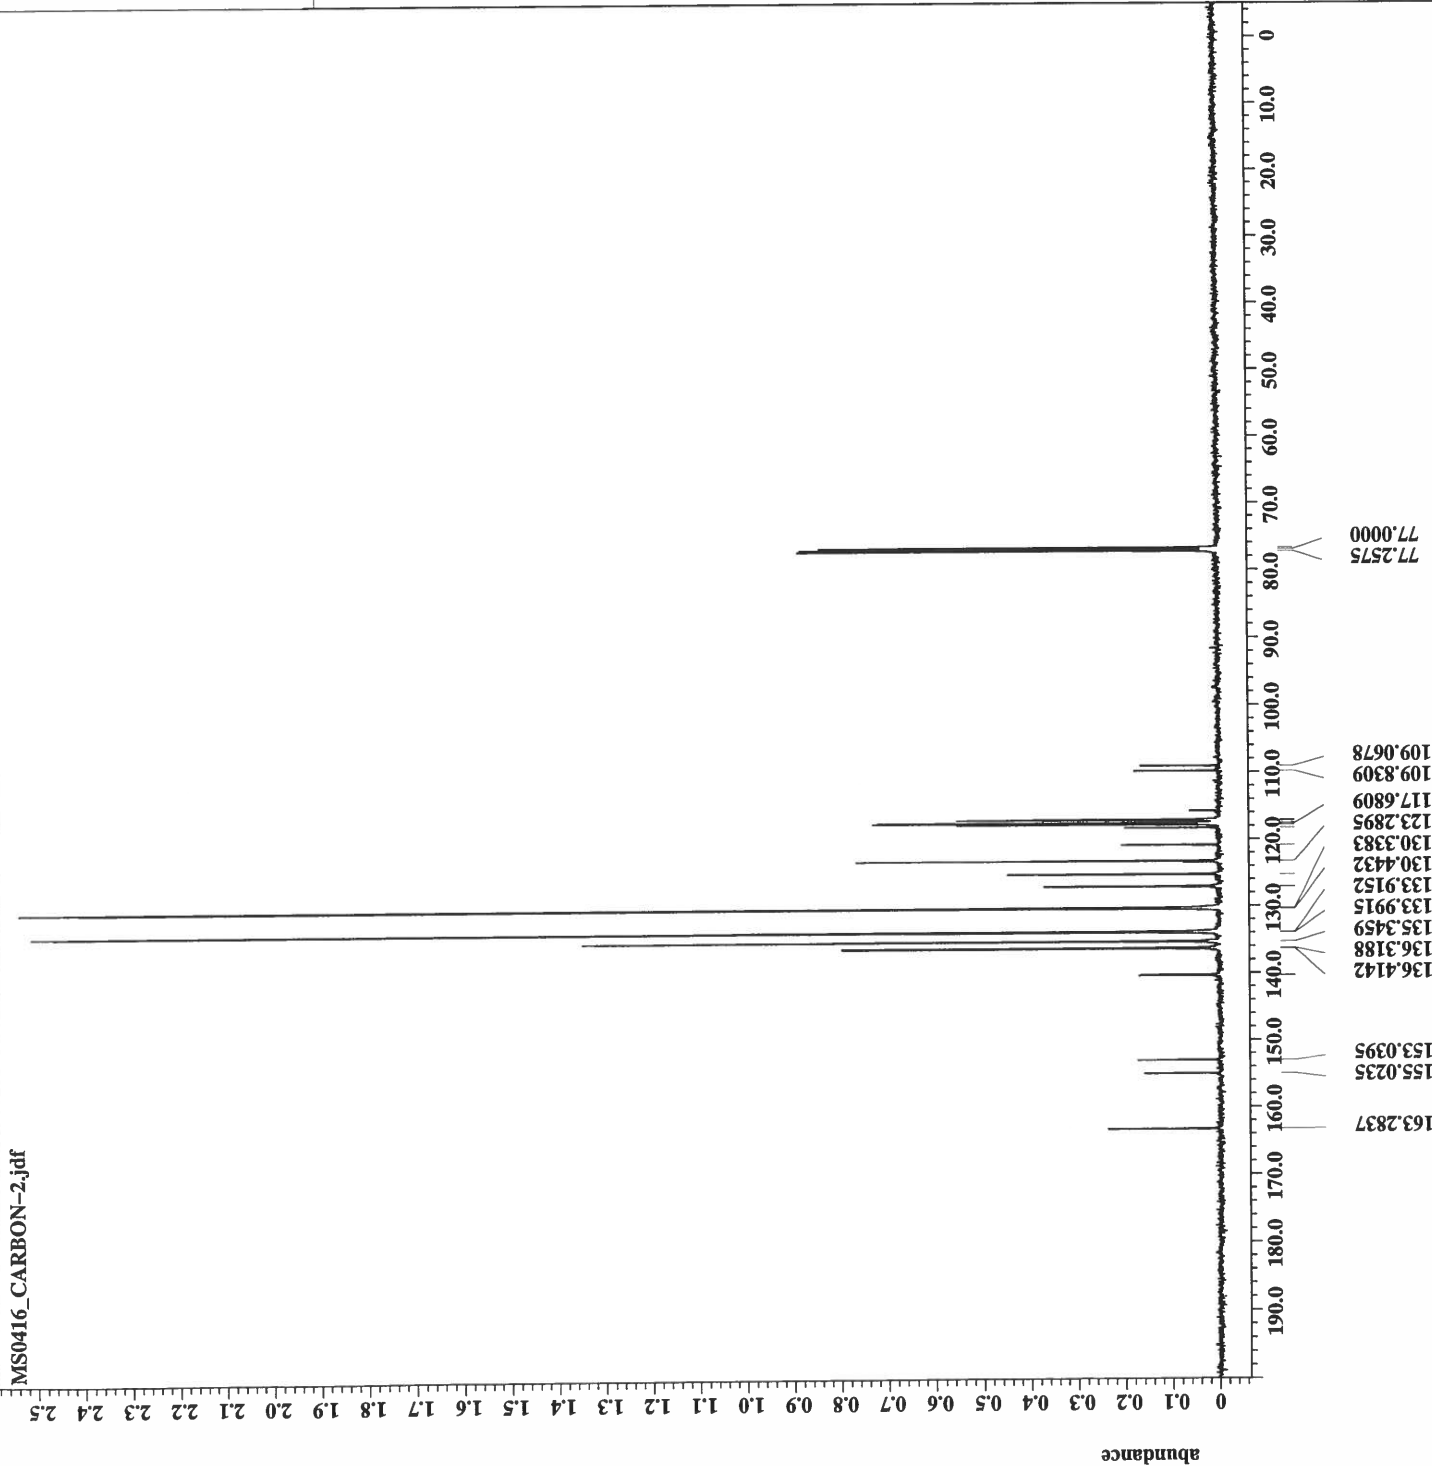

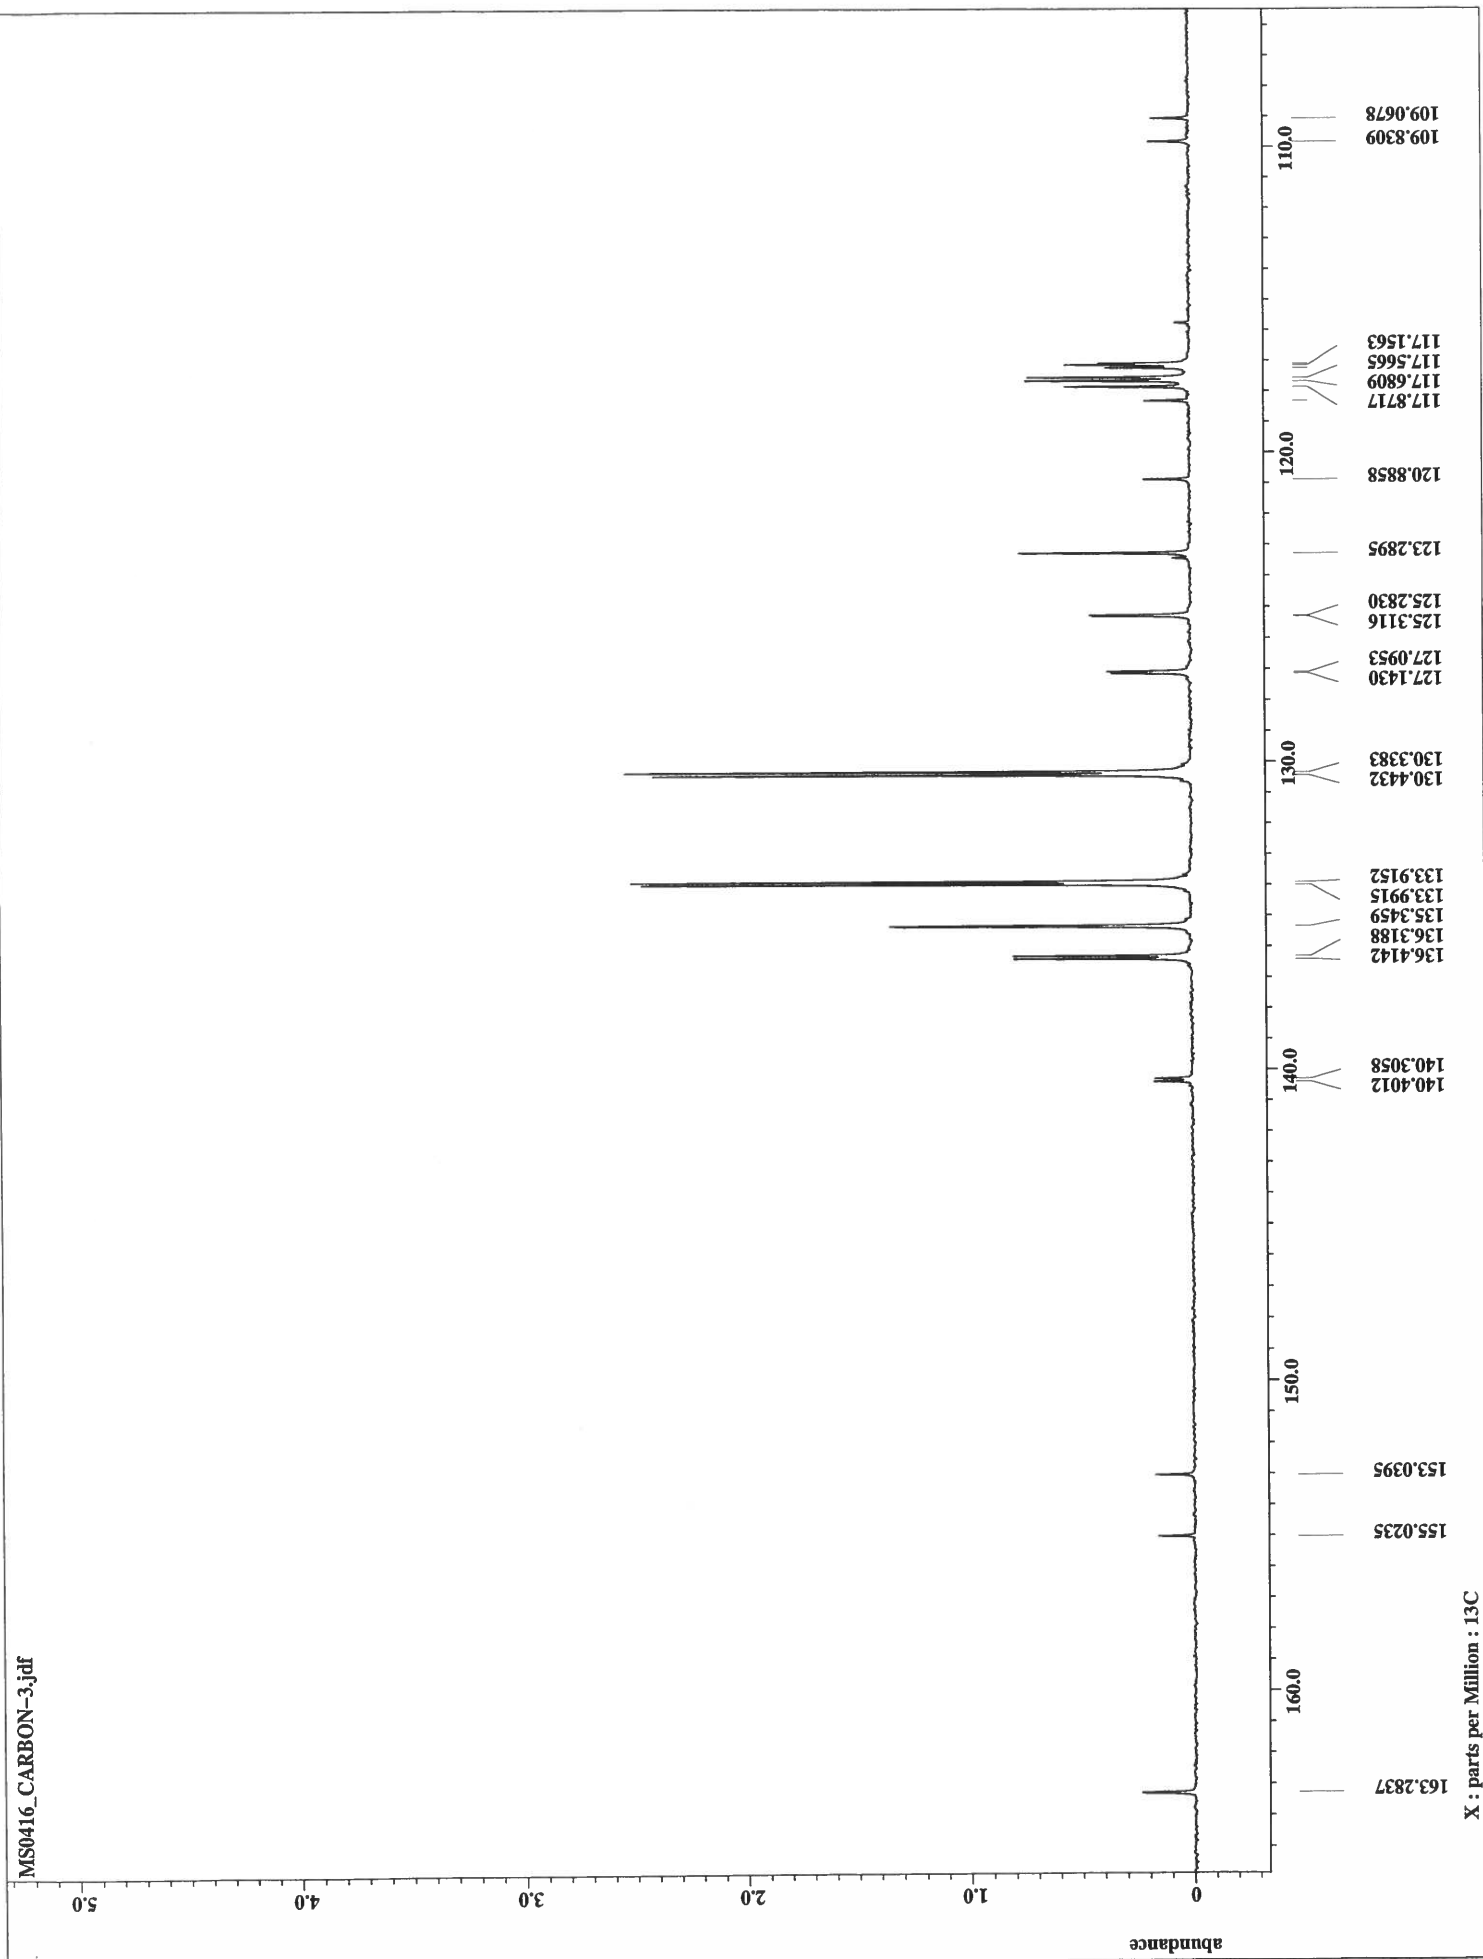

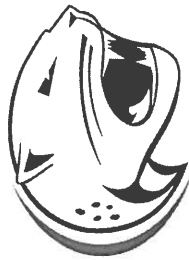**SOUTH ALABAMA**  
**JAGUARS**

Filename = MS0416\_FLUORINE-2.jdf  
Author = Jim Davis  
Experiment = single\_pulse.ex2  
Sample\_id = MS0416  
Solvent = CHLOROFORM-D  
Charger\_sample = 10  
Creation\_time = 14-APR-2018 11:25:31  
Revision\_time = 14-APR-2018 11:03:39  
Current\_time = 14-APR-2018 11:03:39  
Data\_format = 1D COMPLEX  
Dim\_size = 52428  
Dim\_title = 19F  
Dim\_units = [ppm]  
Dimensions = X  
Site = ECA 500  
Spectrometer = JNM-ECA500  
Field\_strength = 11.7473579[T] (500[MH  
X\_acq\_duration = 0.55574528[s]  
X\_domain = 19F  
X\_freq = 470.62046084[MHz]  
X\_offset = -70[ppm]  
X\_points = 65536  
X\_prescans = 1  
X\_resolution = 1.7993855[Hz]  
X\_sweep = 117.9245283[kHz]  
Irr\_domain = 19F  
Irr\_freq = 470.62046084[MHz]  
Irr\_offset = 5[ppm]  
Tri\_domain = 19F  
Tri\_freq = 470.62046084[MHz]  
Tri\_offset = 5[ppm]  
Clipped = FALSE  
Mod\_return = 1  
Scans = 16  
Total\_scans = 16  
X\_90\_width = 13.1[us]  
X\_acq\_time = 0.55574528[s]  
X\_angle = 45[deg]  
X\_atn = 2.5[dB]  
X\_pulse = 6.55[us]  
Irr\_pulse = Off  
Irr\_mode = Off  
Tri\_mode = Off  
Dante\_preset = FALSE  
Initial\_wait = 1[s]  
Recvr\_gain = 34  
Relaxation\_delay = 4[s]  
Repetition\_time = 4.55574528[s]  
Temp\_get = 22.6[degC]

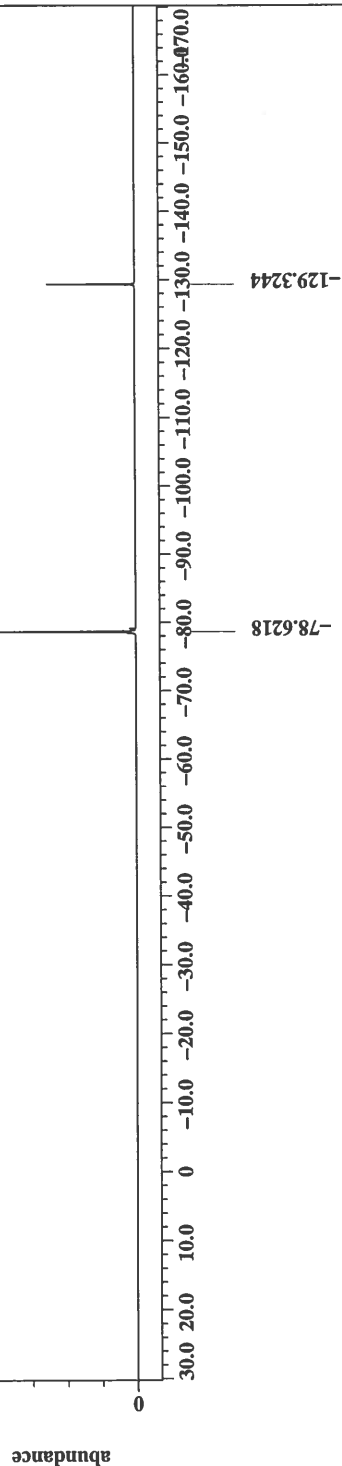

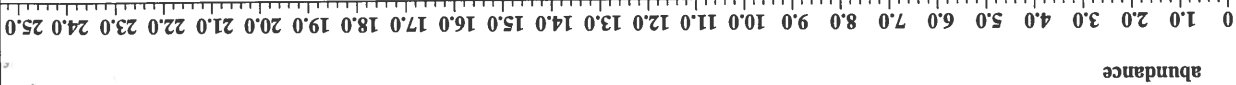

23.1989

X : parts per Million : 31P

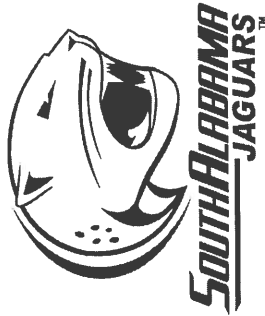

MS0416\_PHOSPHORUS-2.j  
= Jim Davis  
= single\_pulse\_dec  
= MS0416  
= CHLOROFORM-D  
= 10  
= 14-APR-2018 11:29:07  
= 14-APR-2018 11:07:15  
= 14-APR-2018 11:07:15  
= 1D COMPLEX  
= 26214  
= 31P  
= [ppm]  
= X  
= ECA 500  
= JNM-ECA500  
Field\_strength = 11.7473579[T] (500[MH  
X\_acq\_duration = 0.64487424[s]  
X\_domain = 31P  
X\_freq = 202.46831075[MHz]  
X\_offset = 0[ppm]  
X\_points = 32768  
X\_prescans = 4  
X\_resolution = 1.55068995[Hz]  
X\_sweep = 50.81300813[kHz]  
Irr\_domain = 1H  
Irr\_freq = 500.15991521[MHz]  
Irr\_offset = 5.0[ppm]  
Clipped = FALSE  
Mod\_return = 1  
Scans = 25  
Total\_scans = 25  
X\_90\_width = 14.687[us]  
X\_acq\_time = 0.64487424[s]  
X\_angle = 30[deg]  
X\_atn = 5[db]  
X\_pulse = 4.89566667[us]  
Irr\_atn\_dec = 20.7[db]  
Irr\_atn\_noe = 20.7[db]  
Irr\_noise = WALTZ  
Decoupling = TRUE  
Initial\_wait = 1[s]  
Noe = TRUE  
Noe\_time = 2[s]  
Relaxr\_gain = 54  
Relaxation\_delay = 2[s]  
Repetition\_time = 2.64487424[s]  
Temp\_get = 23[dc]



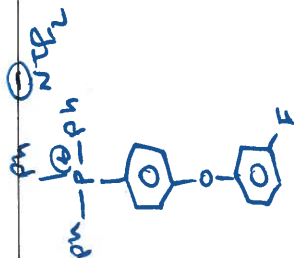

MS0446\_PROTON-2.jdf

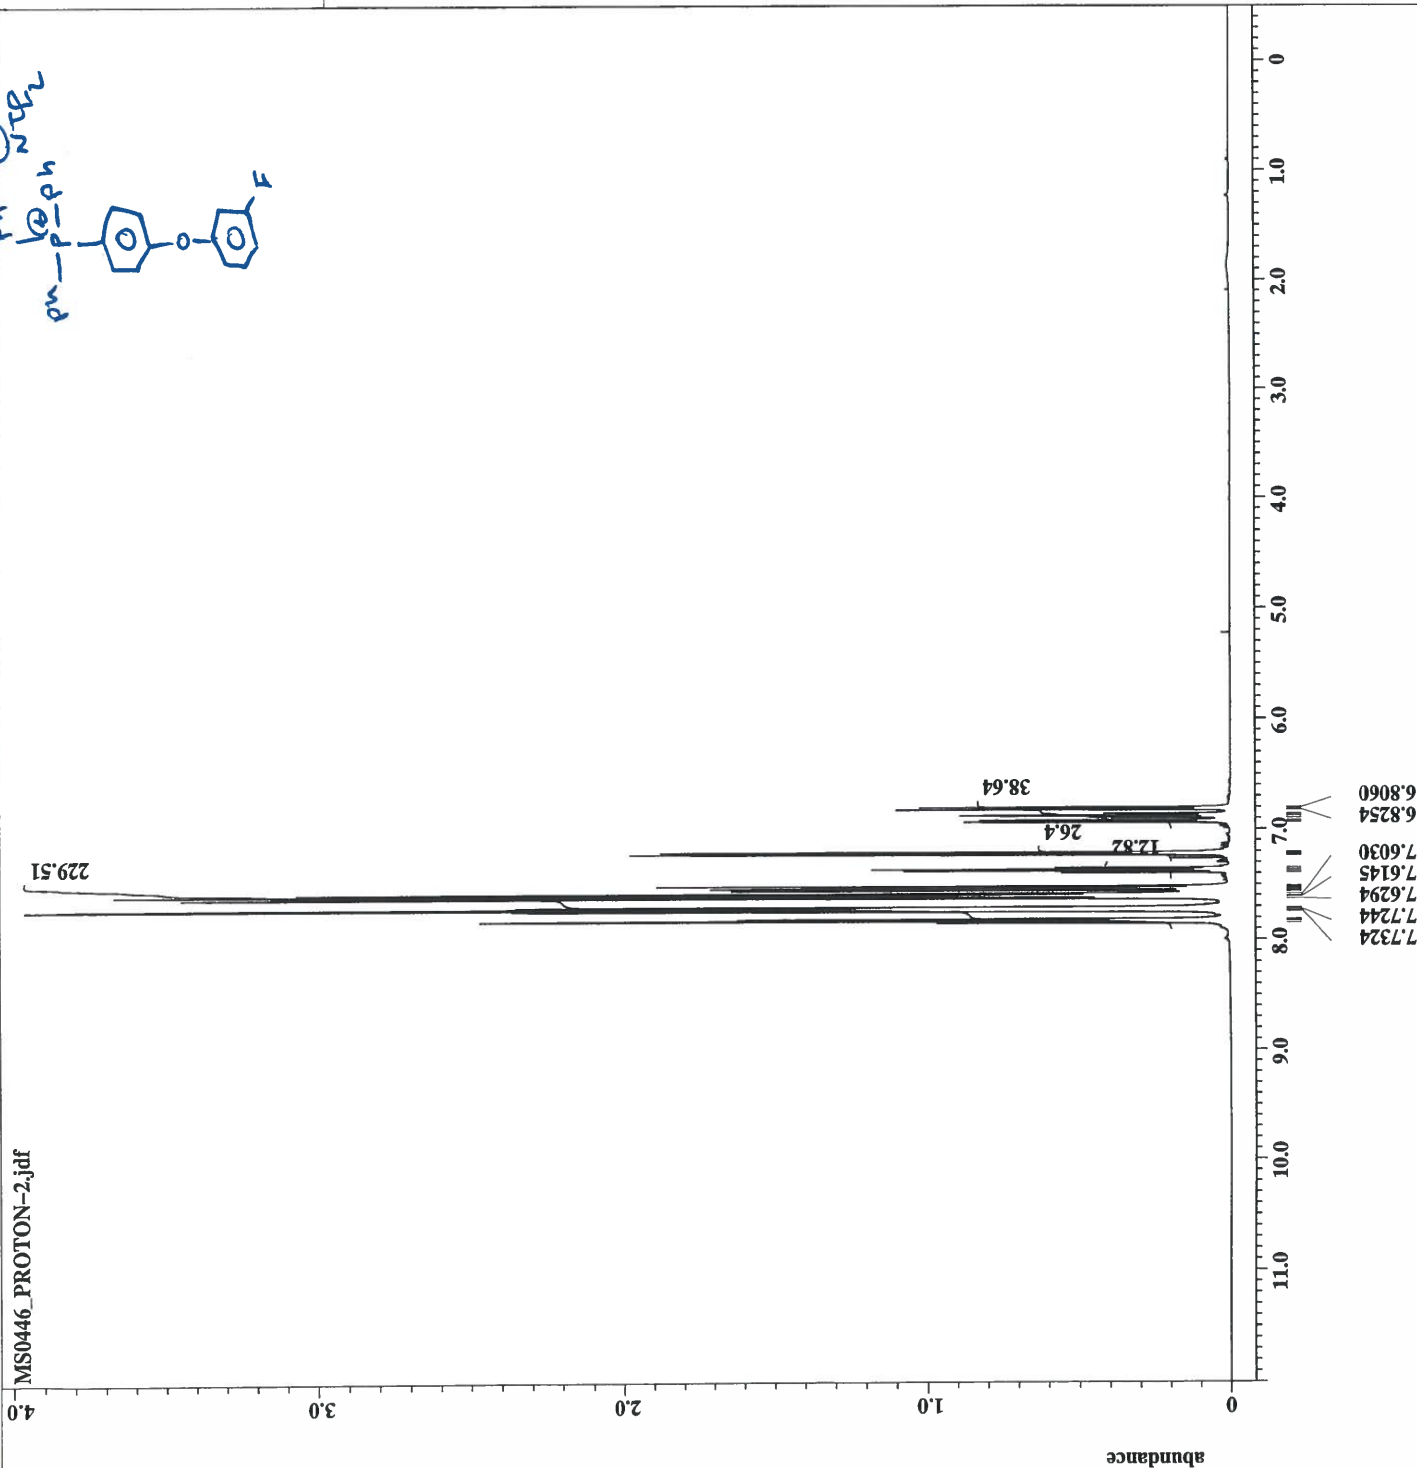

X : parts per Million : 1H

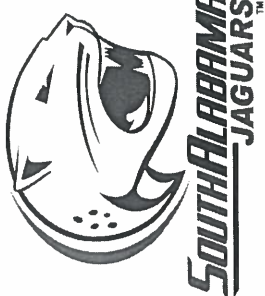

Filename = MS0446\_PROTON-2.jdf  
 Author = Jim Davis  
 Experiment = single\_pulse.ex2  
 Sample\_id = MS0446  
 Solvent = CHLOROFORM-D  
 Changen\_sample = 1  
 Creation\_time = 14-MAY-2018 12:32:44  
 Revision\_time = 14-MAY-2018 12:08:31  
 Current\_time = 14-MAY-2018 12:08:31  
 Data\_format = 1D COMPLEX  
 Dim\_size = 13107  
 Dim\_title = 1H  
 Dim\_units = [ppm]  
 Dimensions = X  
 Site = ECA 500  
 Spectrometer = JNM-ECA500  
 Field\_strength = 11.7473579[T] (500[MH  
 X\_acq\_duration = 1.74587904[s]  
 X\_domain = 1H  
 X\_freq = 500.15991521[MHz]  
 X\_offset = 5.0[ppm]  
 X\_points = 16384  
 X\_prescans = 1  
 X\_resolution = 0.57277737[Hz]  
 X\_sweep = 9.38438438[kHz]  
 Irr\_domain = 1H  
 Irr\_freq = 500.15991521[MHz]  
 Irr\_offset = 5.0[ppm]  
 Tri\_domain = 1H  
 Tri\_freq = 500.15991521[MHz]  
 Tri\_offset = 5.0[ppm]  
 Clipped = FALSE  
 Mod\_return = 1  
 Scans = 16  
 Total\_scans = 16  
 X\_90\_width = 12.4[us]  
 X\_acq\_time = 1.74587904[s]  
 X\_angle = 45[deg]  
 X\_atn = 4[db]  
 X\_pulse = 6.2[us]  
 Irr\_mode = Off  
 Tri\_mode = Off  
 Dante\_preset = FALSE  
 Initial\_wait = 1[s]  
 Recvr\_gain = 20  
 Relaxation\_delay = 4[s]  
 Repetition\_time = 5.74587904[s]  
 Temp\_get = 22.8[dc]

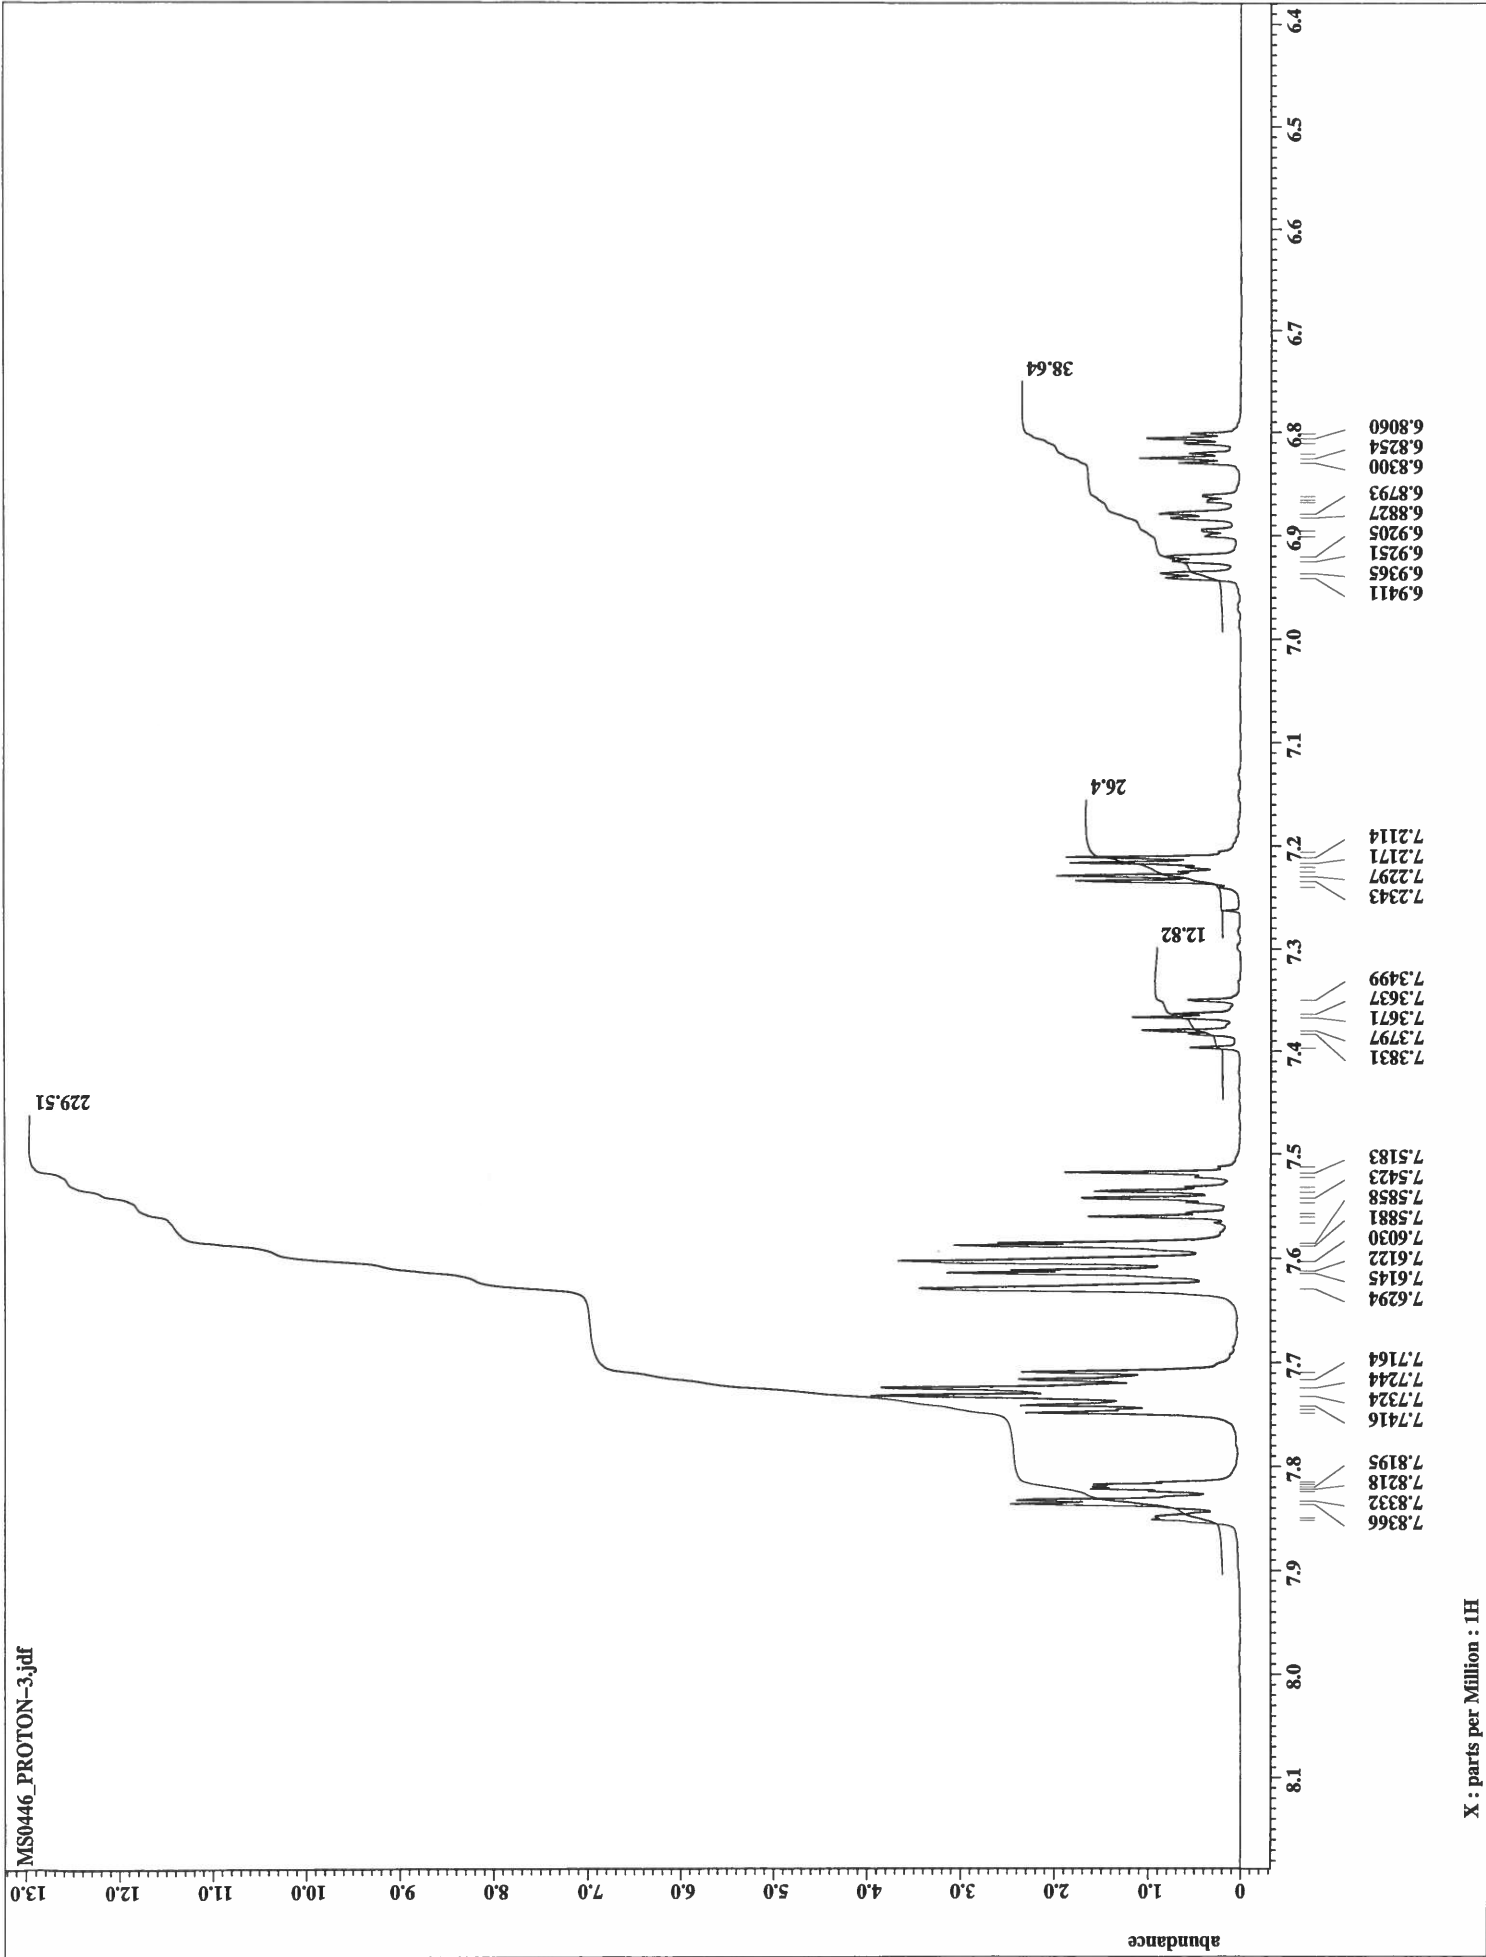

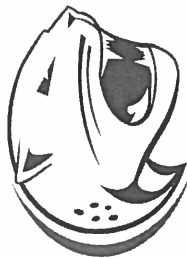

**SOUTH ALABAMA**  
**JAGUARS**

```

= MS0446_CARBON-2.jdf
= Jim Davis
= single_pulse_dec
= MS0446
= CHLOROFORM-D
= 1
= 14-MAY-2018 12:41:05
= 14-MAY-2018 12:16:51
= 14-MAY-2018 12:16:51
= 1D COMPLEX
= 26214
= 13C
= [ppm]
= X
= ECA 500
= JNM-ECA500
= 11.7473579 [T] (500 [MH
= 0.83361792 [s]
= 13C
= 125.76529768 [MHz]
= 100 [ppm]
= 32768
= 4
= 1.19959034 [Hz]
= 1H
= 39.3081761 [kHz]
= 500.15991521 [MHz]
= 5.0 [ppm]
= FALSE
= 1
= 128
= 128
= 13.2 [us]
= 0.83361792 [s]
= 30 [deg]
= 6 [dB]
= 4.4 [us]
= 20.7 [dB]
= 20.7 [dB]
= WALTZ
= TRUE
= 1 [s]
= TRUE
= 2 [s]
= 60
= 2 [s]
= 2.83361792 [s]
= 22.8 [dC]
  
```

```

Filename
Author
Experiment
Sample_id
Solvent
Changer_sample
Creation_time
Revision_time
Current_time
Data_format
Dim_size
Dim_title
Dim_units
Dimensions
Site
Spectrometer
Field_strength
X_acq_duration
X_domain
X_freq
X_offset
X_points
X_prescans
X_resolution
X_sweep
Irr_domain
Irr_freq
Irr_offset
Clipped
Mod_return
Scans
Total_scans
X_90_width
X_acq_time
X_angle
X_atn
X_pulse
Irr_atn_dec
Irr_atn_noe
Irr_noise
Decoupling
Initial_wait
Noe
Noe_time
Recvr_gain
Relaxation_delay
Repetition_time
Temp_get
  
```

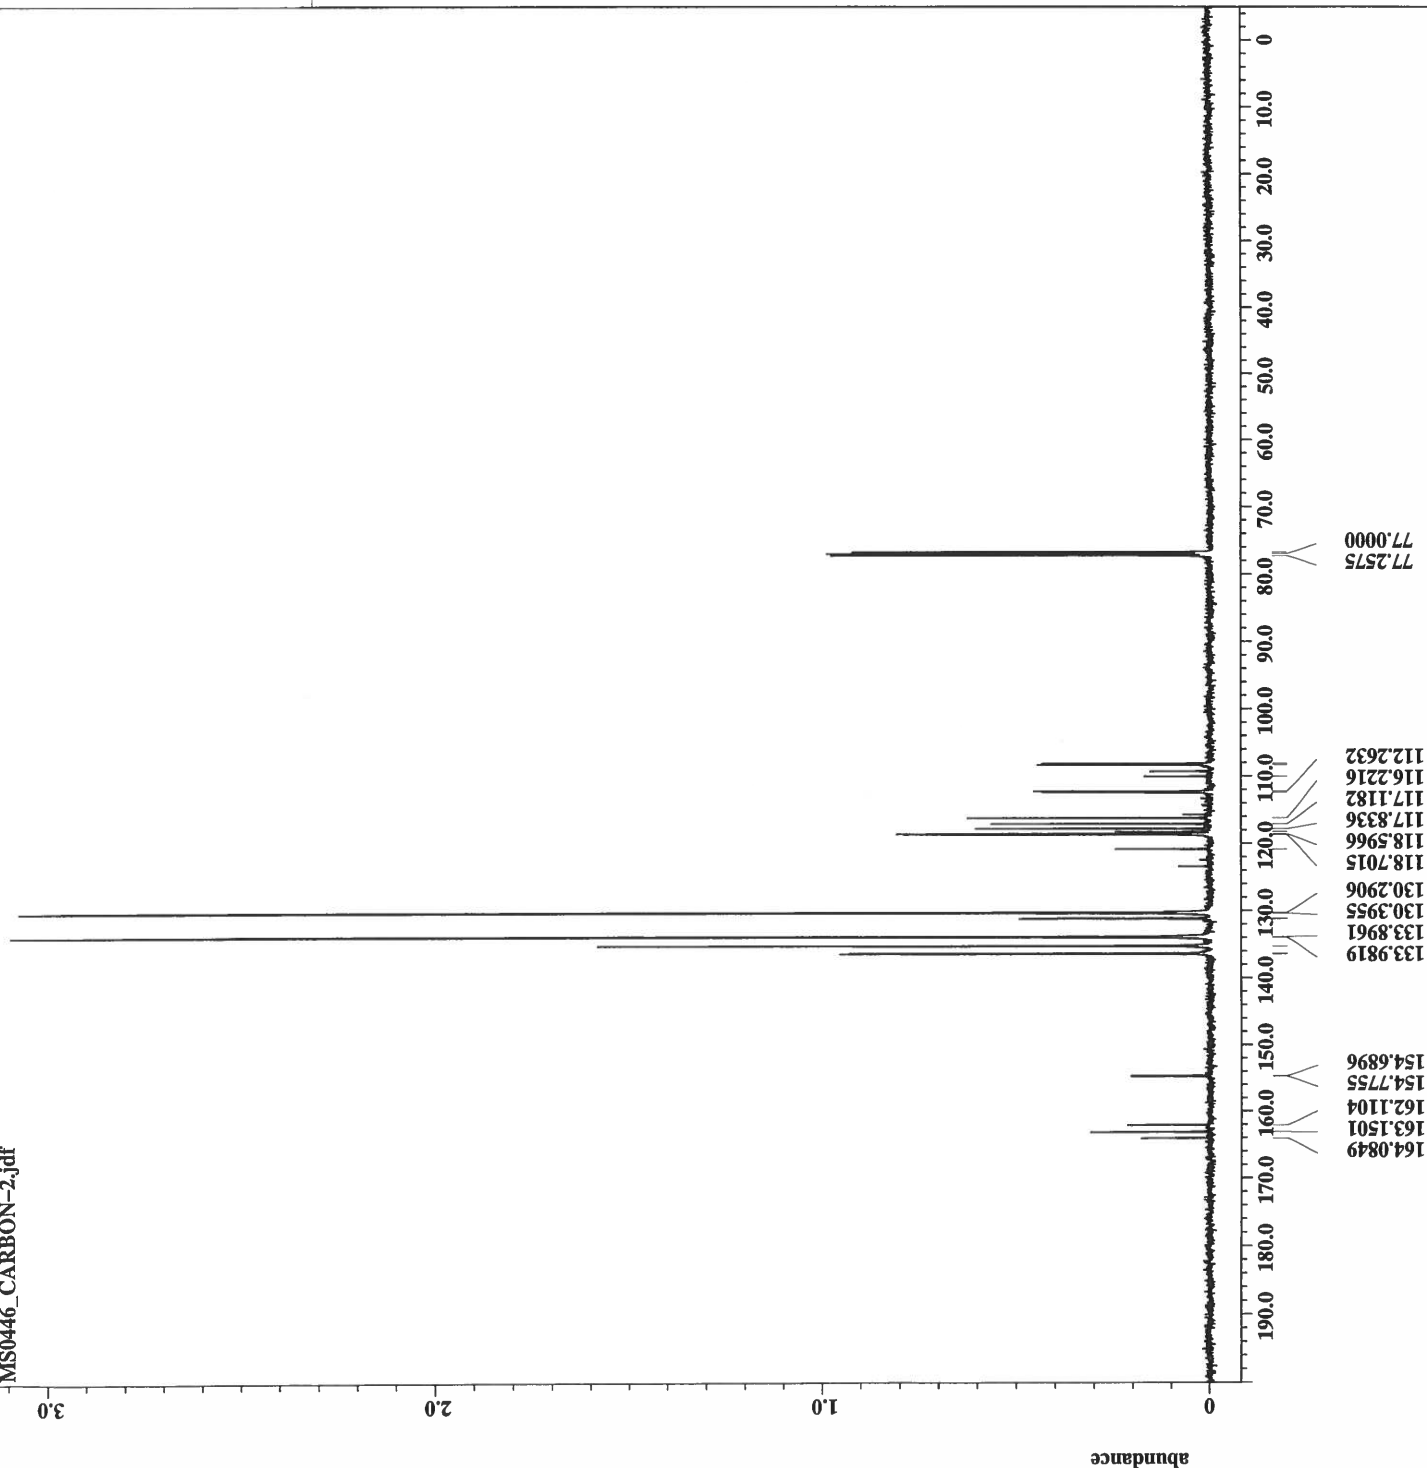

X : parts per Million : 13C

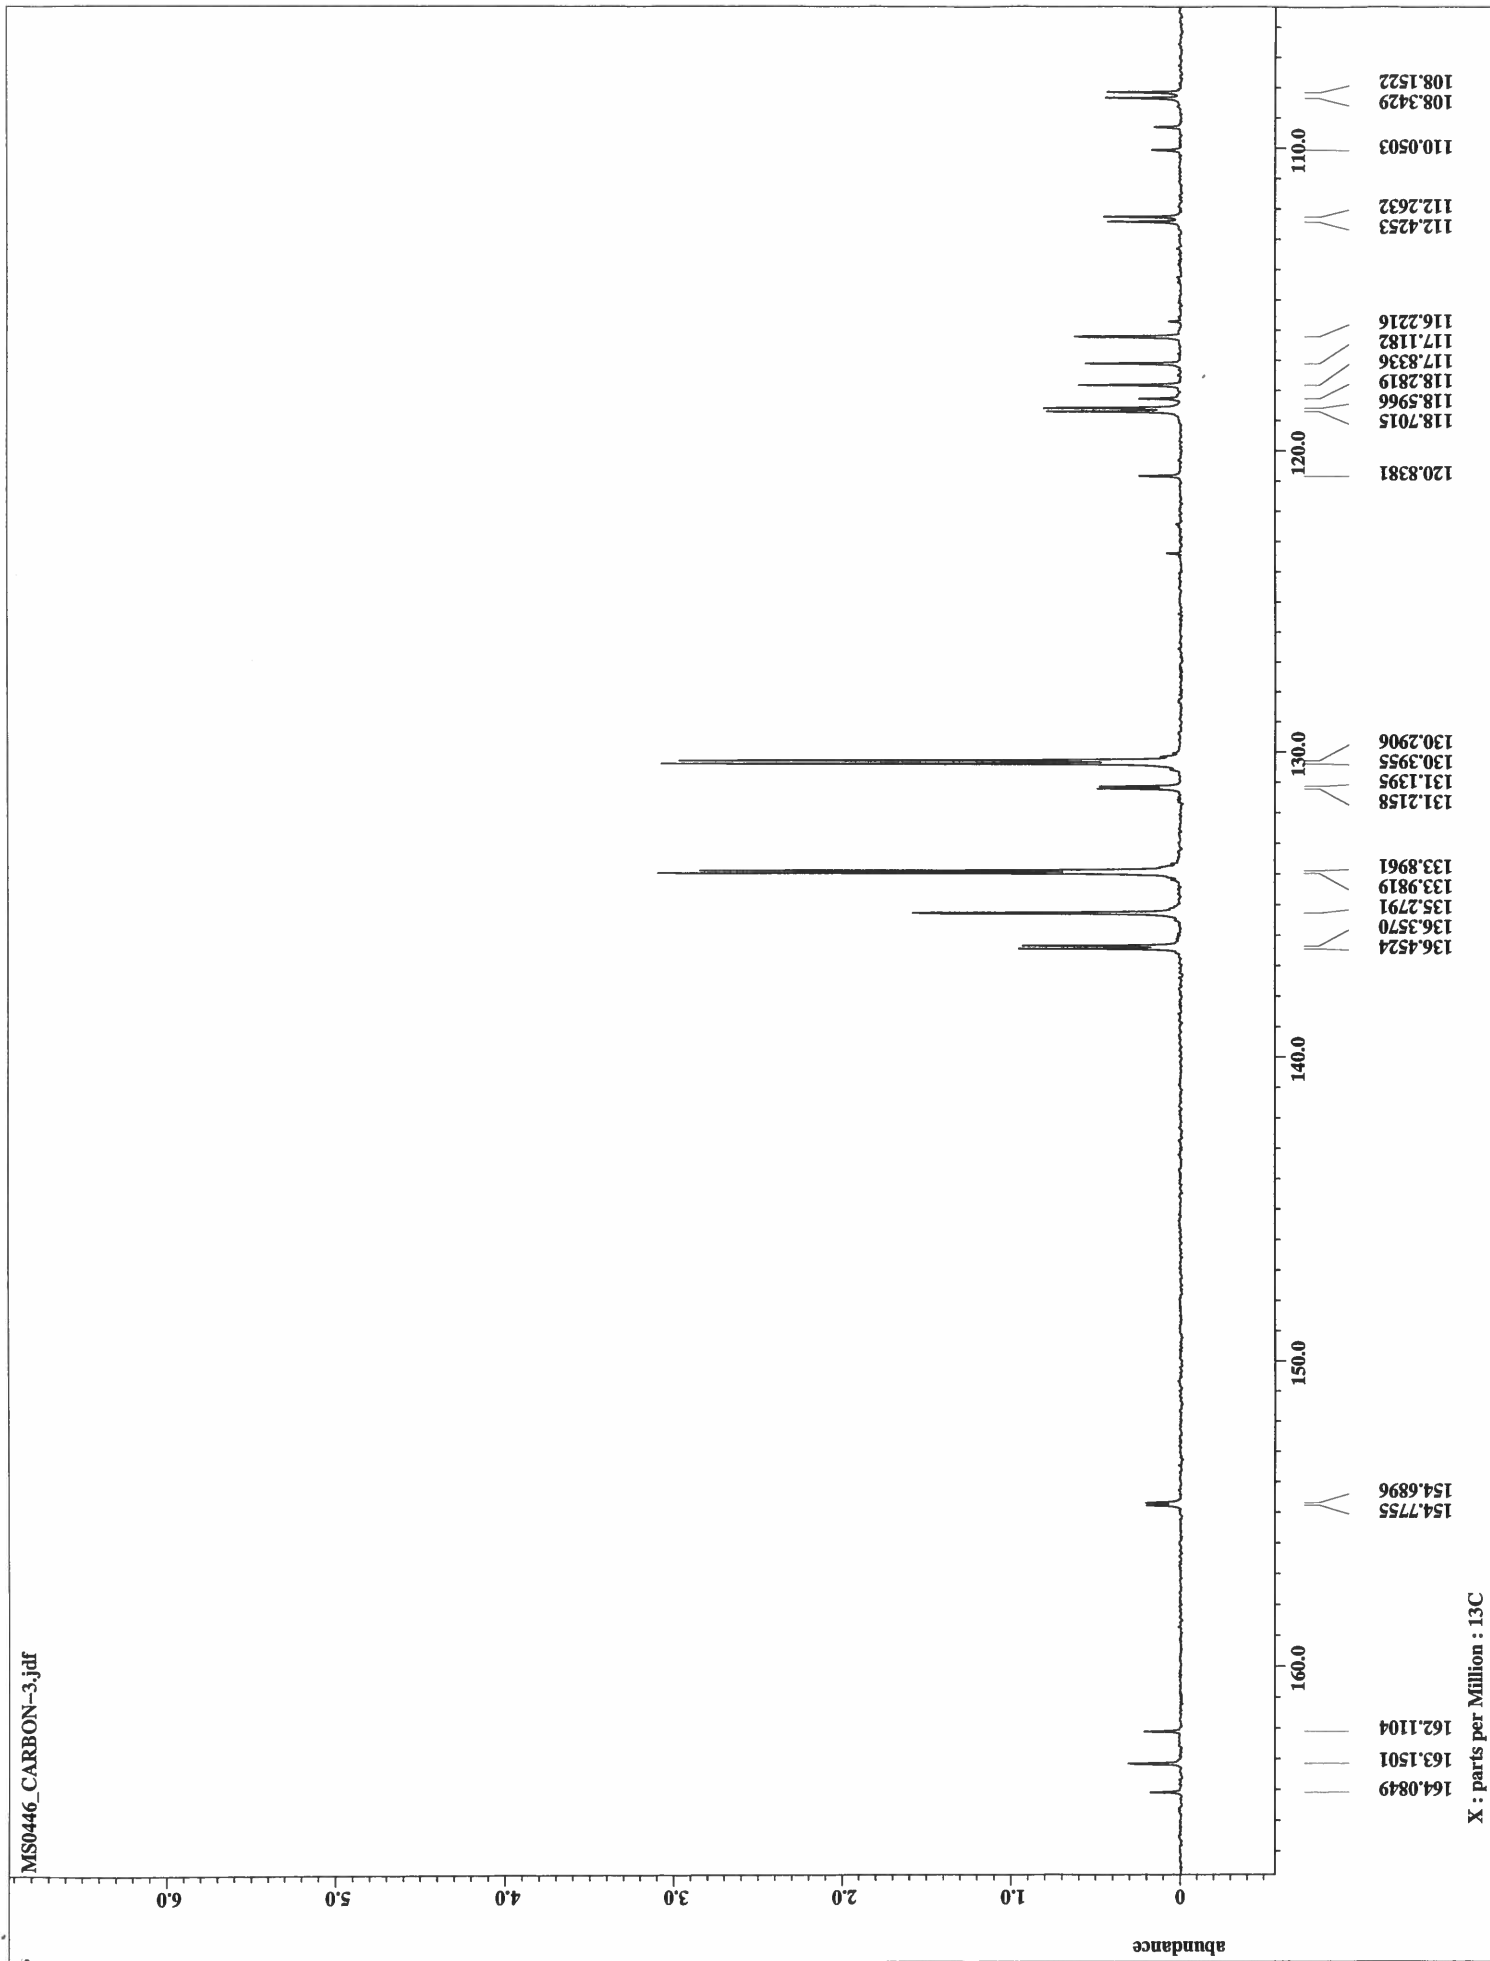

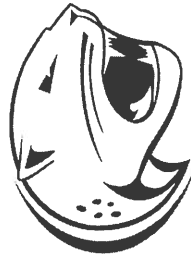

**SOUTH ALABAMA**  
**JAGUARS**

Filename = MS0446\_FLUORINE-2.jdf  
Author = Jim Davis  
Experiment = single\_pulse.ex2  
Sample\_id = MS0446  
Solvent = CHLOROFORM-D  
Changer\_sample = 1  
Creation\_time = 14-MAY-2018 12:25:44  
Revision\_time = 14-MAY-2018 12:01:32  
Current\_time = 14-MAY-2018 12:01:32  
Data\_format = 1D COMPLEX  
Dim\_size = 52428  
Dim\_title = 19F  
Dim\_units = [ppm]  
Dimensions = X  
Site = ECA 500  
Spectrometer = JNM-ECA500  
Field\_strength = 11.7473579[T] (500[MH  
X\_acq\_duration = 0.55574528[s]  
X\_domain = 19F  
X\_freq = 470.62046084[MHz]  
X\_offset = -70[ppm]  
X\_points = 65536  
X\_prescans = 1  
X\_resolution = 1.7993855[Hz]  
X\_sweep = 117.9245283[kHz]  
Irr\_domain = 19F  
Irr\_freq = 470.62046084[MHz]  
Irr\_offset = 5[ppm]  
Tri\_domain = 19F  
Tri\_freq = 470.62046084[MHz]  
Tri\_offset = 5[ppm]  
Clipped = FALSE  
Mod\_return = 1  
Scans = 16  
Total\_scans = 16  
X\_90\_width = 13.1[us]  
X\_acq\_time = 0.55574528[s]  
X\_angle = 45[deg]  
X\_atn = 2.5[dB]  
X\_pulse = 6.55[us]  
Irr\_mode = Off  
Tri\_mode = Off  
Dante\_preset = FALSE  
Initial\_wait = 1[s]  
Recvr\_gain = 30  
Relaxation\_delay = 4[s]  
Repetition\_time = 4.55574528[s]  
Temp\_get = 22.7[dc]

abundance

30.0

20.0

10.0

0

30.0 20.0 10.0 0 -10.0 -20.0 -30.0 -40.0 -50.0 -60.0 -70.0 -80.0 -90.0 -100.0 -110.0 -120.0 -130.0 -140.0 -150.0 -160-070.0

-78.6218

-109.5572  
-109.5419

X : parts per Million : 19F

3.0

2.0

1.0

0

abundance

-107.0

-108.0

-109.0

-109.5419  
-109.5572

-110.0

-111.0

X : parts per Million : 19F

0 1.0 2.0 3.0 4.0 5.0 6.0 7.0 8.0 9.0 10.0 11.0 12.0 13.0 14.0 15.0 16.0 17.0 18.0 19.0 20.0 21.0 22.0 23.0 24.0 25.0 26.0 27.0

abundance

100.0 90.0 80.0 70.0 60.0 50.0 40.0 30.0 20.0 10.0 0 -10.0 -20.0 -30.0 -40.0 -50.0 -60.0 -70.0 -80.0 -90.0 100.0

23.2219

X : parts per Million : 31P

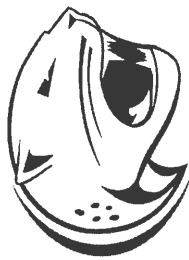**SOUTH ALABAMA**  
**JAGUARS**™

Filename = MS0446\_PHOSPHORUS-2.j  
Author = Jim Davis  
Experiment = single\_pulse\_dec  
Sample\_id = MS0446  
Solvent = CHLOROFORM-D  
Changer\_sample = 1  
Creation\_time = 14-MAY-2018 12:29:19  
Revision\_time = 14-MAY-2018 12:05:05  
Current\_time = 14-MAY-2018 12:05:05  
Data\_format = 1D COMPLEX  
Dim\_size = 26214  
Dim\_title = 31P  
Dim\_units = [ppm]  
Dimensions = X  
Site = ECA 500  
Spectrometer = JNM-ECA500  
Field\_strength = 11.7473579[T] (500[MH  
X\_acq\_duration = 0.64487424[s]  
X\_domain = 31P  
X\_freq = 202.46831075[MHz]  
X\_offset = 0[ppm]  
X\_points = 32768  
X\_prescans = 4  
X\_resolution = 1.55068995[Hz]  
X\_sweep = 50.81300813[KHz]  
Irr\_domain = 1H  
Irr\_freq = 500.15991521[MHz]  
Irr\_offset = 5.0[ppm]  
Clipped = FALSE  
Mod\_return = 1  
Scans = 25  
Total\_scans = 25  
X\_90\_width = 14.687[us]  
X\_acq\_time = 0.64487424[s]  
X\_angle = 30[deg]  
X\_atn = 5[db]  
X\_pulse = 4.89566667[us]  
Irr\_atn\_dec = 20.7[db]  
Irr\_atn\_noe = 20.7[db]  
Irr\_noise = WALTZ  
Decoupling = TRUZ  
Initial\_wait = 1[s]  
Noe = TRUE  
Noe\_time = 2[s]  
Recvr\_gain = 54  
Relaxation\_delay = 2[s]  
Repetition\_time = 2.64487424[s]  
Temp\_get = 23[degC]

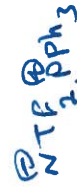

215.53

73.71

7.7130  
7.7061  
7.5984  
7.5824  
7.5721  
7.5561

X : parts per Million : 1H

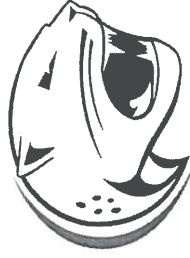

**SOUTH ALABAMA**  
**JAGUARS**

```

Filename      = MS0402_PROTON-5.jdf
Author       = Jim Davis
Experiment    = single_pulse.ex2
Sample_id    = MS0402
Solvent       = CHLOROFORM-D
Changer_sample      = 6
Creation_time   = 18-MAY-2018 16:54:40
Revision_time    = 18-MAY-2018 16:30:05
Current_time     = 18-MAY-2018 16:30:05

Data_format    = 1D COMPLEX
Dim_size       = 13107
Dim_title      = 1H
Dim_units      = [ppm]
Dimensions     = X
Site           = ECA 500
Spectrometer   = JNM-ECA500

Field_strength = 11.7473579[T] (500[MH
X_acq_duration = 1.74587904[s]
X_domain       = 1H
X_freq         = 500.15991521[MHz]
X_offset       = 5.0[ppm]
X_points       = 16384
X_prescans     = 1
X_resolution   = 0.57277737[Hz]
X_sweep        = 9.38438438[kHz]
Irr_domain     = 1H
Irr_freq       = 500.15991521[MHz]
Irr_offset     = 5.0[ppm]
Tri_domain     = 1H
Tri_freq       = 500.15991521[MHz]
Tri_offset     = 5.0[ppm]
Clipped        = FALSE
Mod_return     = 1
Scans          = 16
Total_scans    = 16

X_90_width     = 12.4[us]
X_acq_time     = 1.74587904[s]
X_angle        = 45[deg]
X_atn          = 4[db]
X_pulse        = 6.2[us]
Irr_pulse      = Off
Irr_mode       = Off
Dante_preset   = FALSE
Initial_wait   = 1[s]
Recvr_gain     = 24
Relaxation_delay = 4[s]
Repetition_time = 5.74587904[s]
Temp_get       = 22.8[dc]
  
```



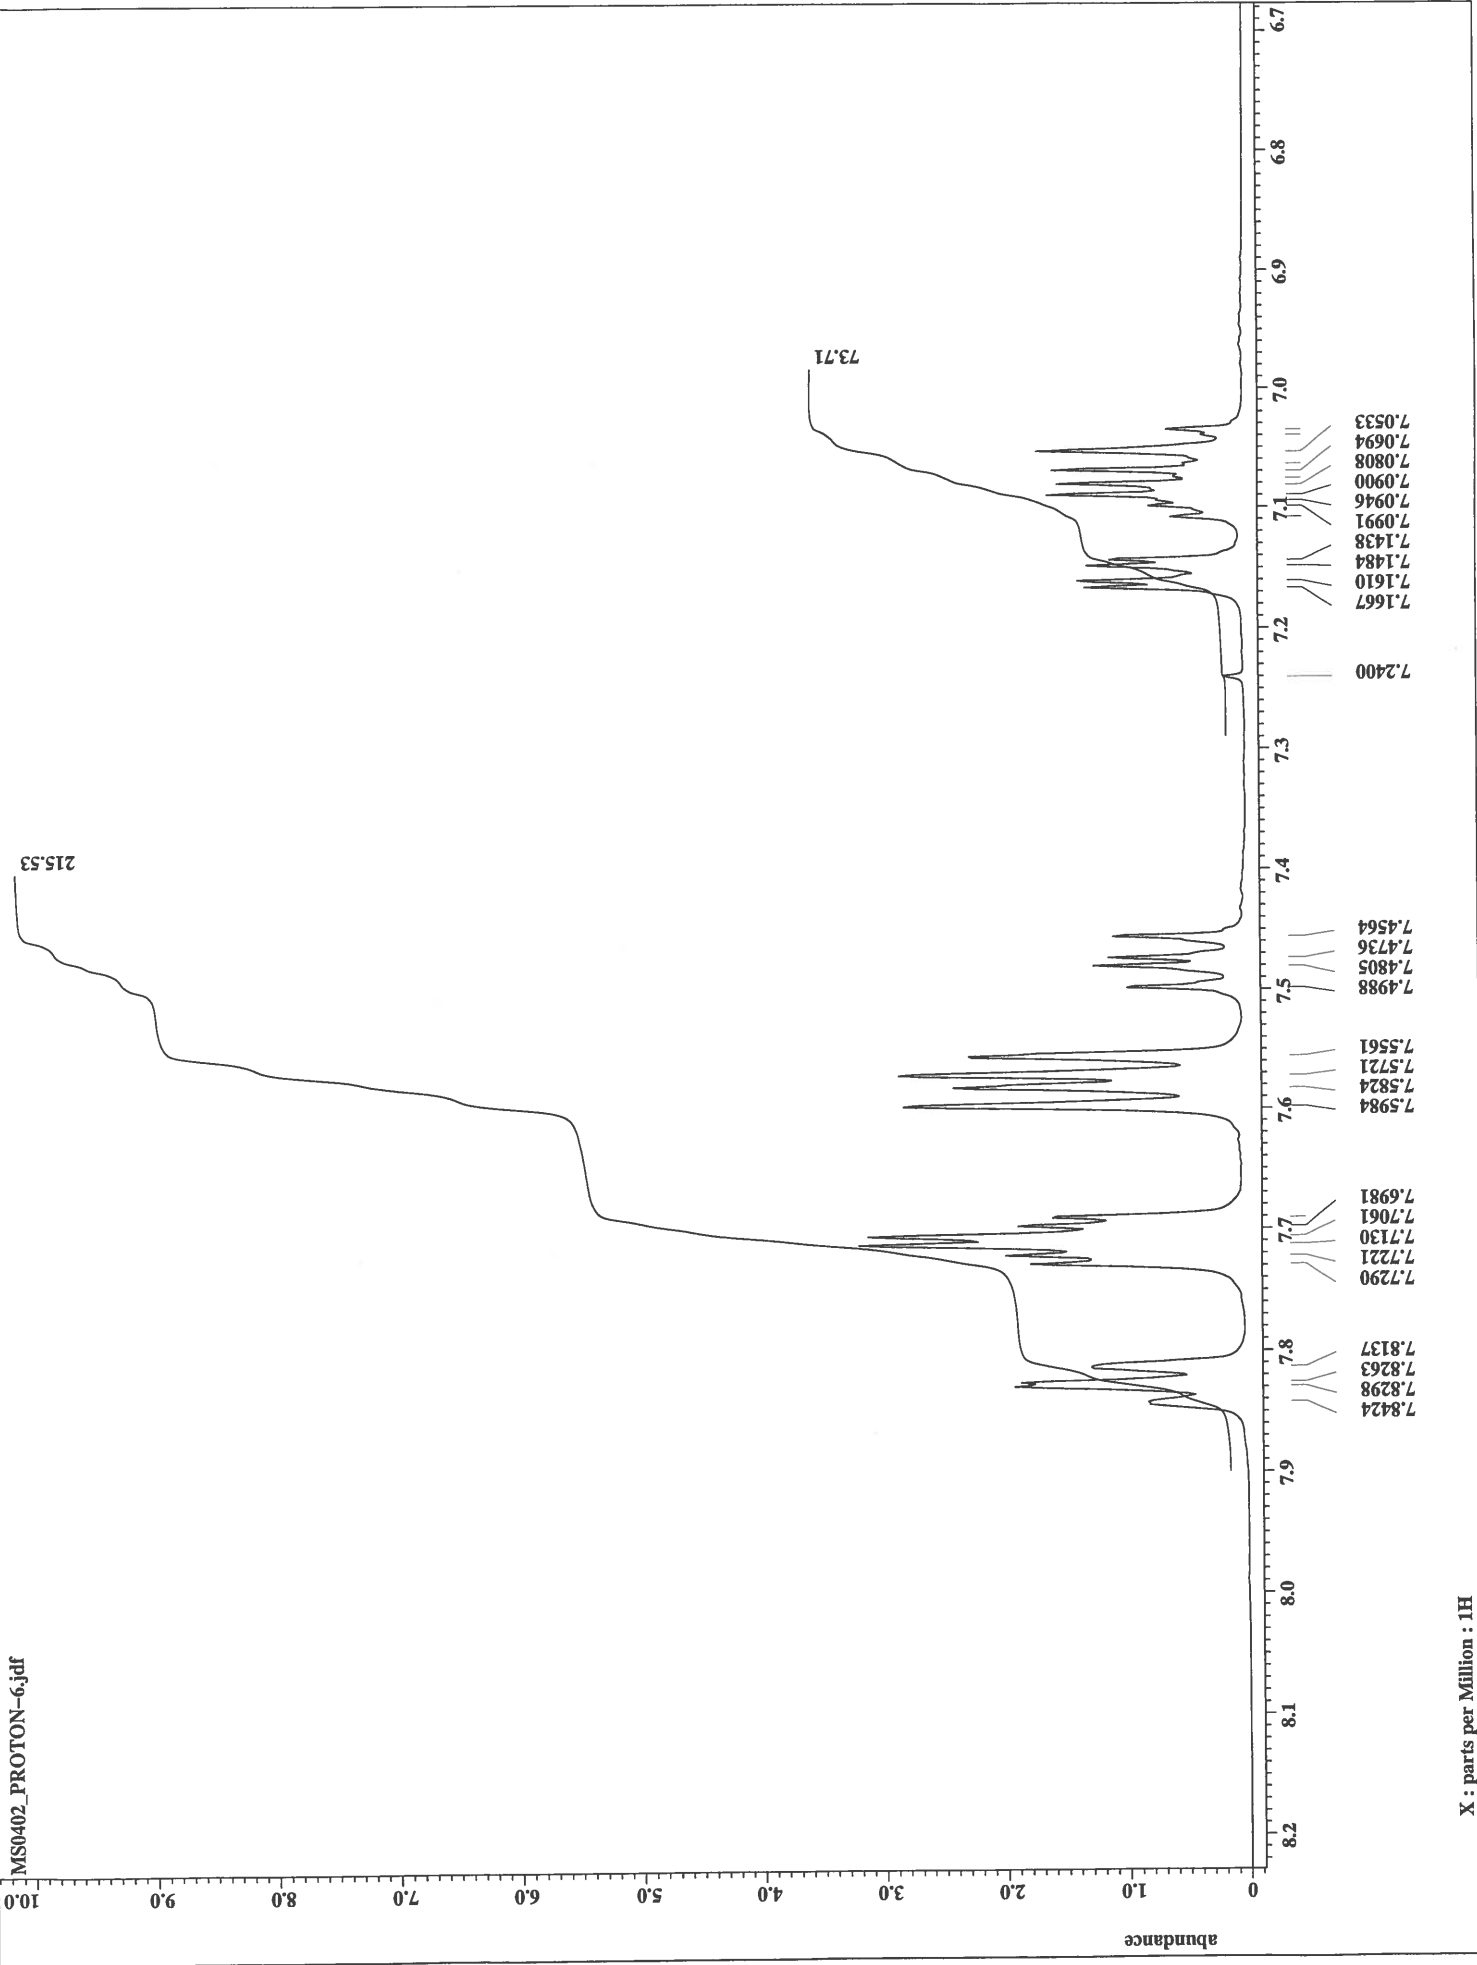

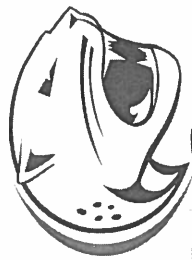

**SOUTH ALABAMA**  
**JAGUARS**

```

Filename      = MS0402_CARBON-5.jdf
Author       = Jim Davis
Experiment    = single_pulse_dec
Sample_id    = MS0402
Solvent      = CHLOROFORM-D
Changer_sample
Creation_time = 18-MAY-2018 17:08:56
Revision_time = 18-MAY-2018 16:44:20
Current_time  = 18-MAY-2018 16:44:20

Data_format  = 1D COMPLEX
Dim_size     = 26214
Dim_title    = 13C
Dim_units    = [ppm]
Dimensions   = x
Site         = ECA 500
Spectrometer = JNM-ECA500

Field_strength = 11.7473579[T] (500[MH
X_acq_duration = 0.83361792[s]
X_domain       = 13C
X_freq         = 125.76529768[MHz]
X_offset       = 100[ppm]
X_points       = 32768
X_prescans     = 4
X_resolution   = 1.19959034[Hz]
X_sweep        = 39.3081761[kHz]
X_domain       = 1H
Irr_freq       = 500.15991521[MHz]
Irr_offset     = 5.0[ppm]
Clipped        = FALSE
Mod_return     = 1
Scans          = 256
Total_scans    = 256

X_90_width     = 13.2[us]
X_acq_time     = 0.83361792[s]
X_angle        = 30[deg]
X_atn          = 6[db]
X_pulse        = 4.4[us]
Irr_atn_dec    = 20.7[db]
Irr_atn_noe    = 20.7[db]
Irr_noise      = WAITZ
Decoupling     = TRUE
Initial_wait   = 1[s]
Noe            = TRUE
Noe_time       = 2[s]
Recvr_gain     = 60
Relaxation_delay = 2[s]
Repetition_time = 2.83361792[s]
Temp_get       = 22.9[dc]
  
```

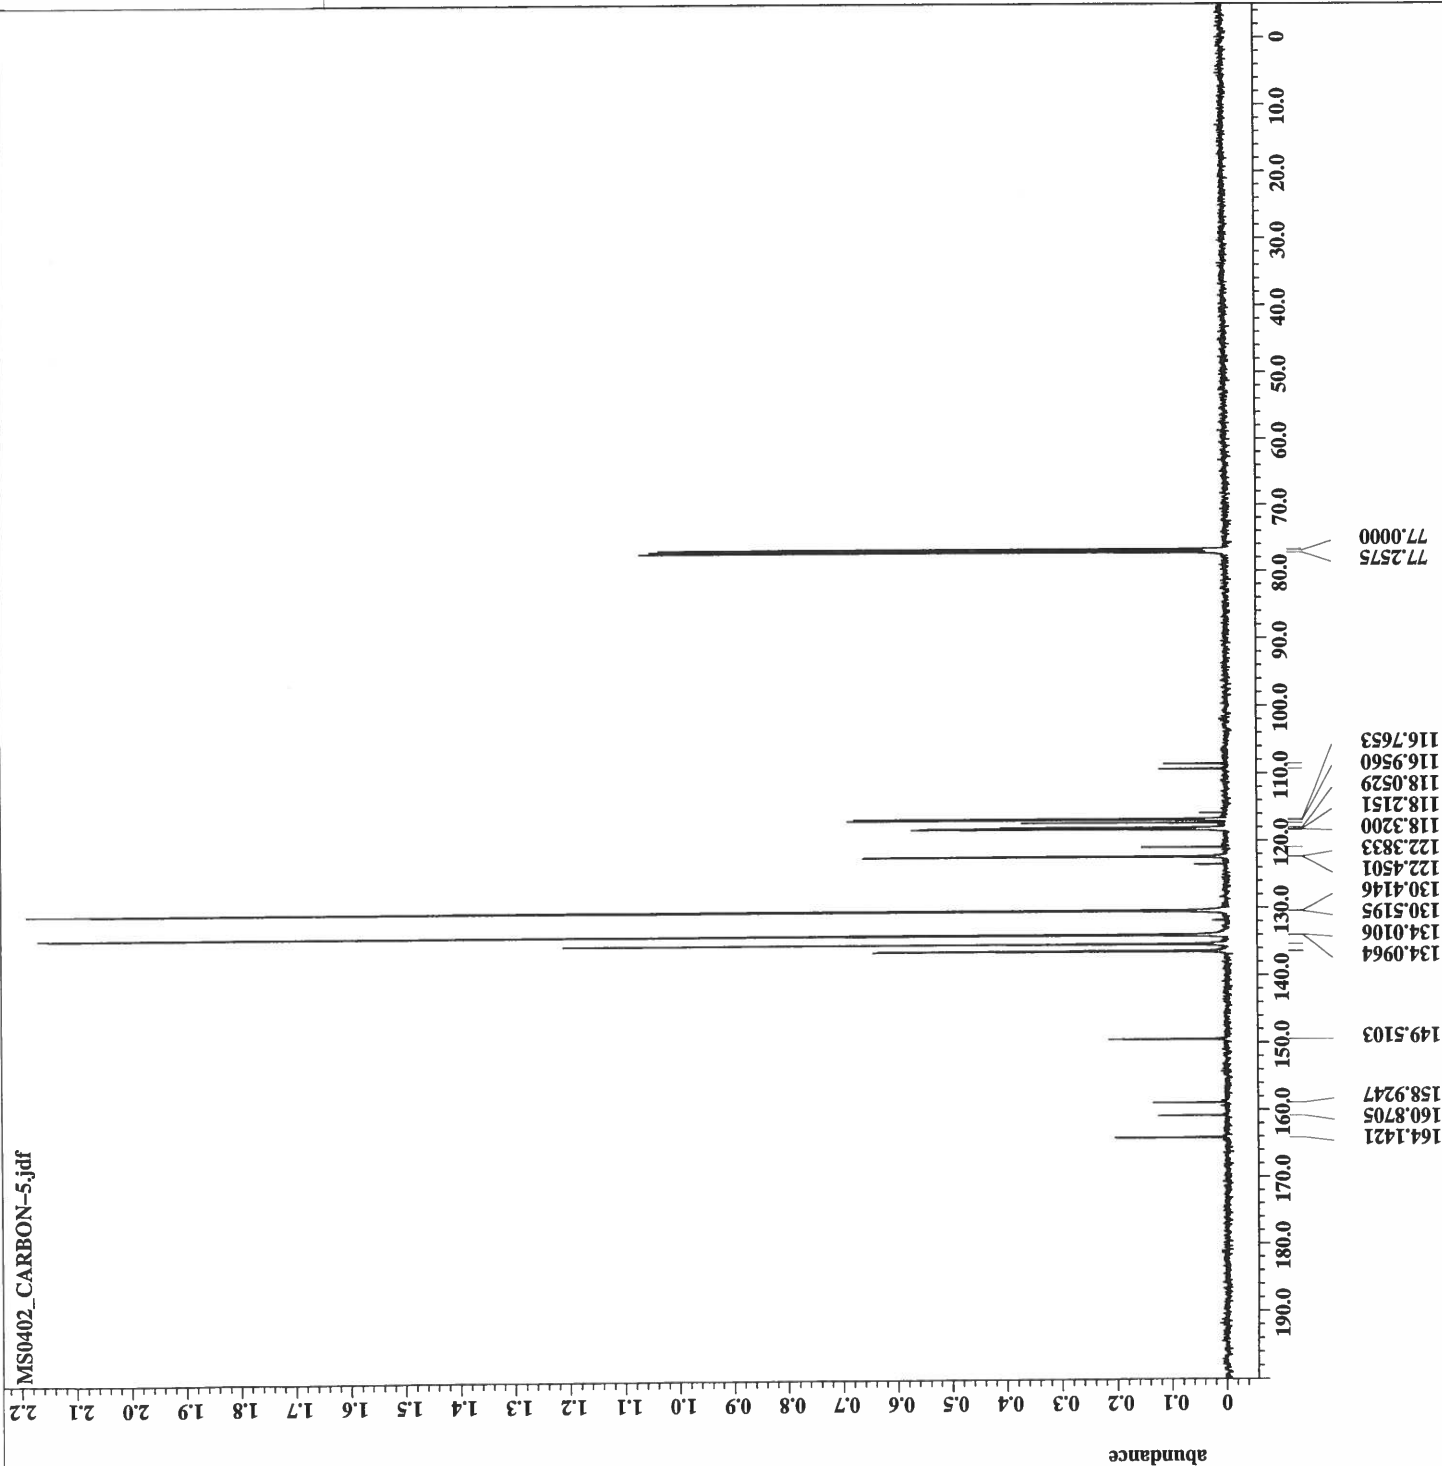

X : parts per Million : 13C

3.0

2.0

1.0

abundance

164.1421

160.8705

158.9247

149.5103

160.0

150.0

140.0

136.4905

136.4047

135.4127

134.0964

134.0106

130.5195

130.4146

130.0

123.5375

122.4501

122.3833

120.9812

120.0

118.3200

118.2151

118.0529

117.3376

116.9560

116.7653

109.3349

108.5718

110.0

X : parts per Million : 13C

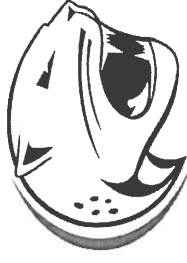

**SOUTH ALABAMA**  
**JAGUARS**

Filename = MS0402\_FLUORINE-5.jdf  
Author = Jim Davis  
Experiment = single\_pulse.ex2  
Sample\_id = MS0402  
Solvent = CHLOROFORM-D  
Changer\_sample = 6  
Creation\_time = 18-MAY-2018 17:11:54  
Revision\_time = 18-MAY-2018 16:47:18  
Current\_time = 18-MAY-2018 16:47:18  
Data\_format = 1D COMPLEX  
Dim\_size = 52428  
Dim\_title = 19F  
Dim\_units = [ppm]  
Dimensions = X  
Site = ECA 500  
Spectrometer = JNM-ECA500  
Field\_strength = 11.7473579[T] (500[MH  
X\_acq\_duration = 0.55574528[s]  
X\_domain = 19F  
X\_freq = 470.62046084[MHz]  
X\_offset = -70[ppm]  
X\_points = 65536  
X\_prescans = 1  
X\_resolution = 1.7993855[Hz]  
X\_sweep = 117.9245283[KHz]  
Irr\_domain = 19F  
Irr\_freq = 470.62046084[MHz]  
Irr\_offset = 5[ppm]  
Tri\_domain = 19F  
Tri\_freq = 470.62046084[MHz]  
Tri\_offset = 5[ppm]  
Clipped = FALSE  
Mod\_return = 1  
Scans = 16  
Total\_scans = 16  
X\_90\_width = 13.1[us]  
X\_acq\_time = 0.55574528[s]  
X\_angle = 45[deg]  
X\_atn = 2.5[dB]  
X\_pulse = 6.55[us]  
Irr\_pulse = Off  
Irr\_mode = Off  
Dante\_presat = FALSE  
Initial\_wait = 1[s]  
Recvr\_gain = 36  
Relaxation\_delay = 4[s]  
Repetition\_time = 4.55574528[s]  
Temp\_get = 22.6[degC]

30.0

20.0

10.0

0

abundance

30.0 20.0 10.0 0 -10.0 -20.0 -30.0 -40.0 -50.0 -60.0 -70.0 -80.0 -90.0 -100.0 -110.0 -120.0 -130.0 -140.0 -150.0 -160.0 -170.0

-78.6142

-116.4623

X : parts per Million : 19F

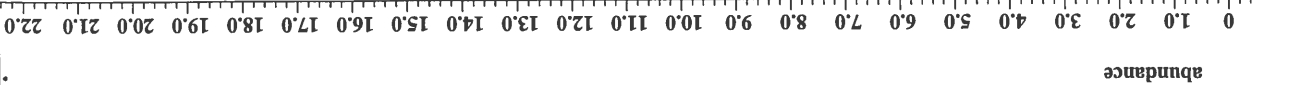

23.2295

X : parts per Million : 31P

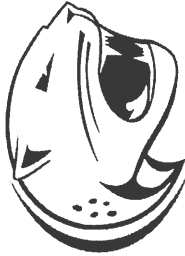

**SOUTH ALABAMA**  
**JAGUARS**

Filename = MS0402\_PHOSPHORUS-5.j  
Author = Jim Davis  
Experiment = single\_pulse\_dec  
Sample\_id = MS0402  
Solvent = CHLOROFORM-D  
Changer\_sample = 6  
Creation\_time = 18-MAY-2018 17:15:26  
Revision\_time = 18-MAY-2018 16:50:51  
Current\_time = 18-MAY-2018 16:50:51  
  
Data\_format = 1D COMPLEX  
Dim\_size = 26214  
Dim\_title = 31P  
Dim\_units = [ppm]  
Dimensions = X  
Site = ECA 500  
Spectrometer = JNM-ECA500  
  
Field\_strength = 11.7473579[T] (500[MH  
X\_acq\_duration = 0.64487424[s]  
X\_domain = 31P  
X\_freq = 202.46831075[MHz]  
X\_offset = 0[ppm]  
X\_points = 32768  
X\_prescans = 4  
X\_resolution = 1.5068995[Hz]  
X\_sweep = 50.81300813[kHz]  
Irr\_domain = 1H  
Irr\_freq = 500.15991521[MHz]  
Irr\_offset = 5.0[ppm]  
Clipped = FALSE  
Mod\_return = 1  
Scans = 25  
Total\_scans = 25  
  
X\_90\_width = 14.687[us]  
X\_acq\_time = 0.64487424[s]  
X\_angle = 30[deg]  
X\_atn = 5[db]  
X\_pulse = 4.89566667[us]  
Irr\_atn\_dec = 20.7[db]  
Irr\_atn\_noe = 20.7[db]  
Irr\_noise = WALTZ  
Decoupling = TRUE  
Initial\_wait = 1[s]  
Noe = TRUE  
Noe\_time = 2[s]  
Recvr\_gain = 56  
Relaxation\_delay = 2[s]  
Repetition\_time = 2.64487424[s]  
Temp\_get = 22.9[dc]

abundance

196.95

58.31

7.7083  
7.6521  
7.6499  
7.6350  
7.4460

10.0 9.0 8.0 7.0 6.0 5.0 4.0 3.0 2.0 1.0

2.1552

2.58

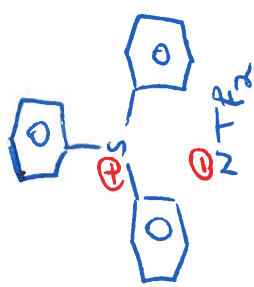

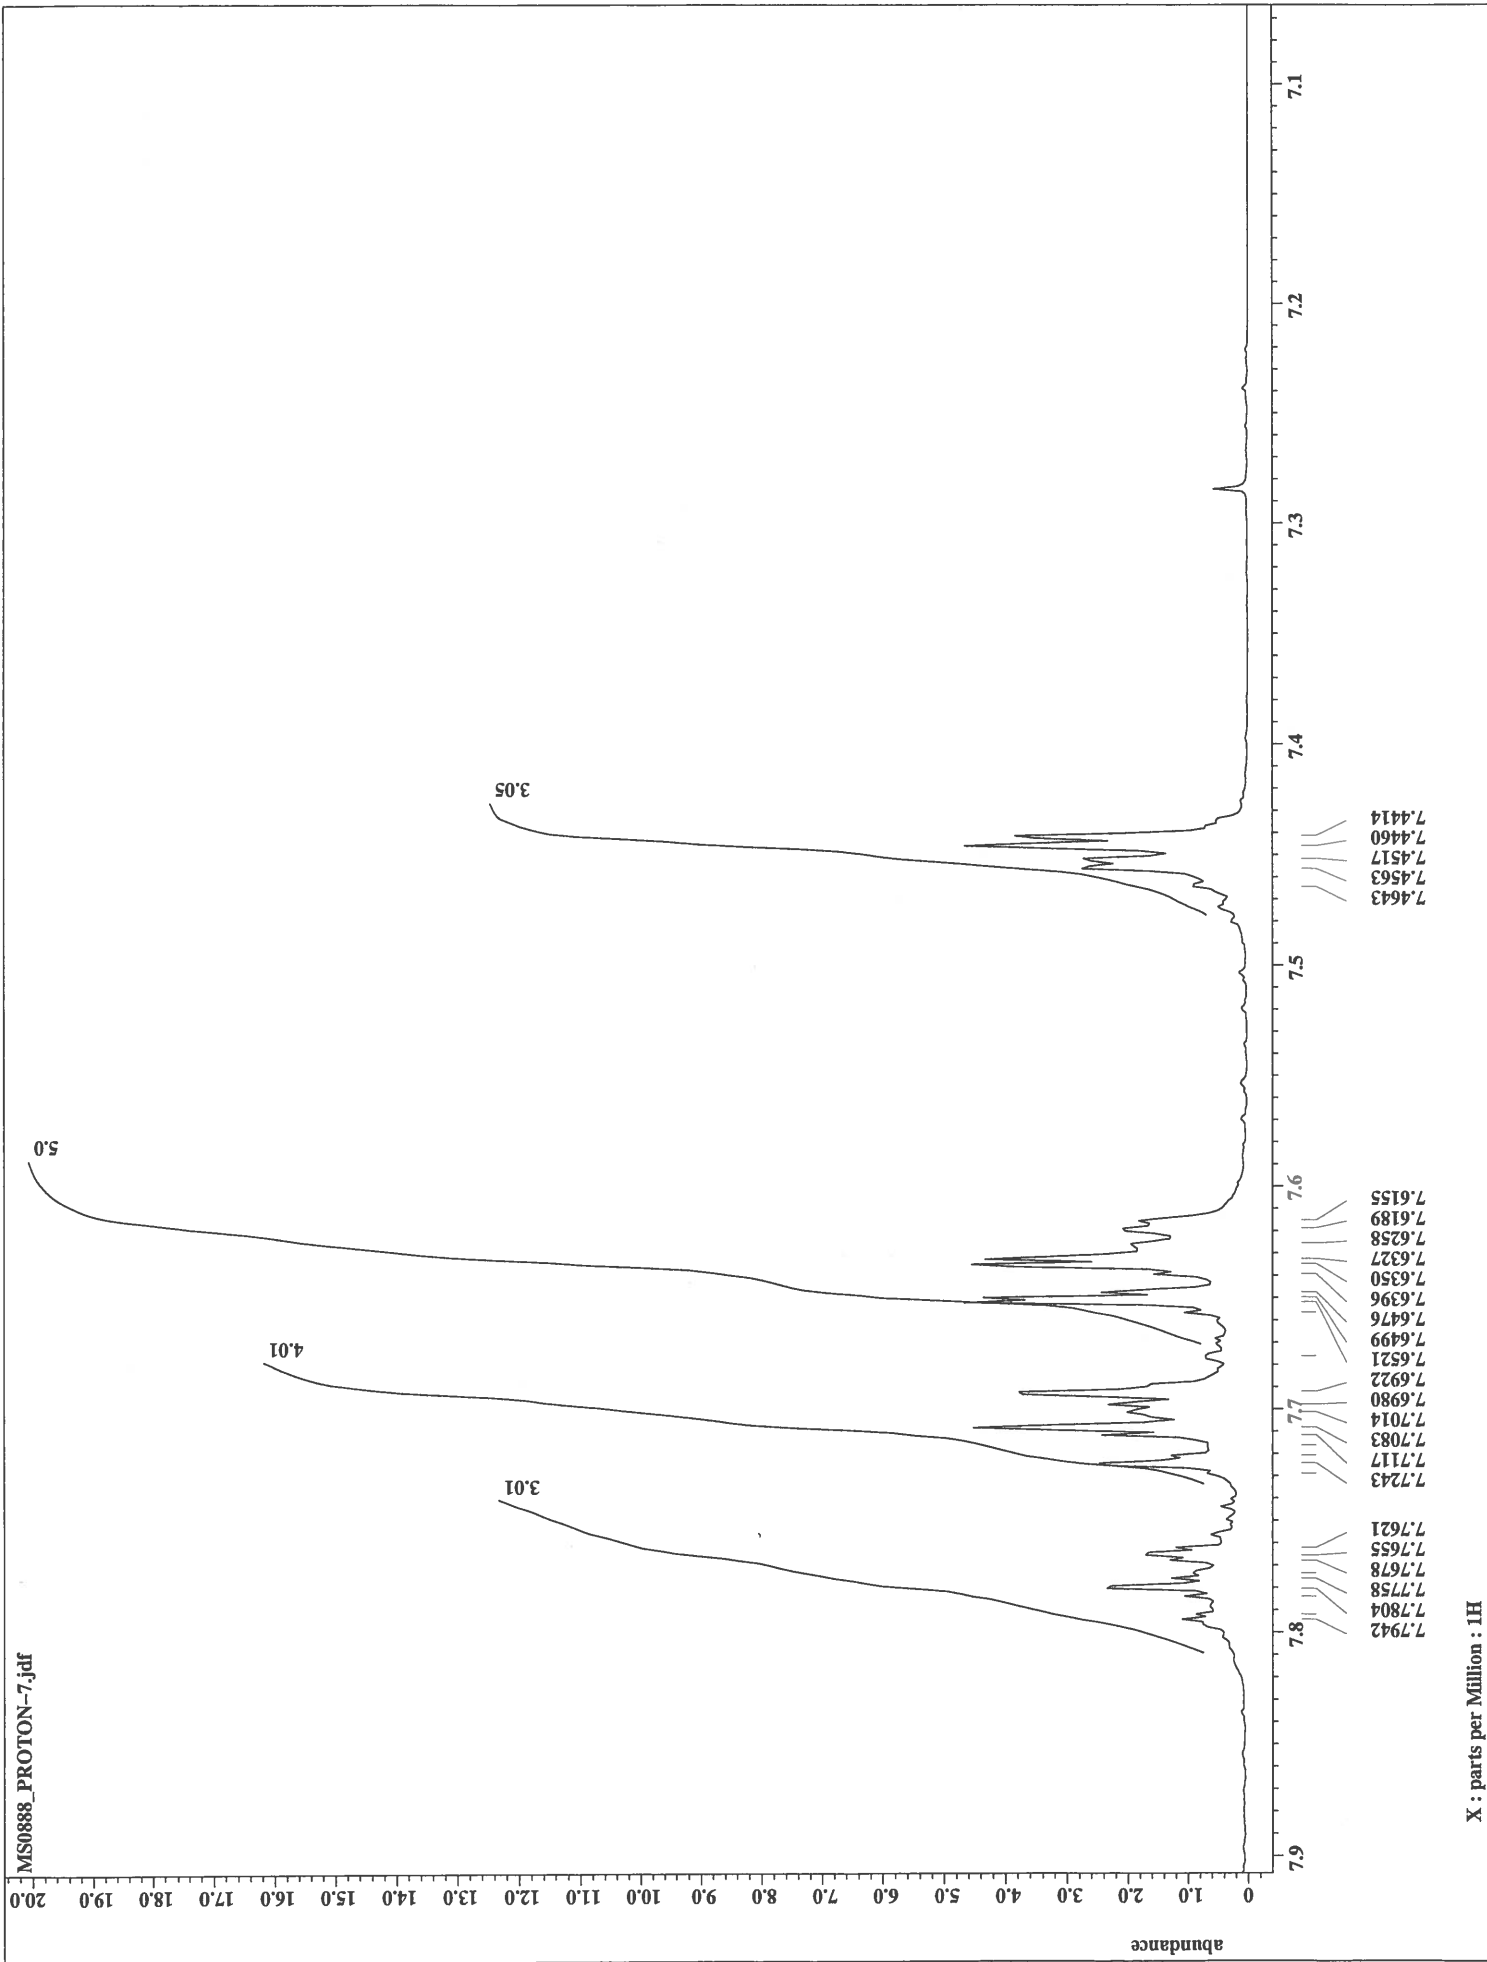

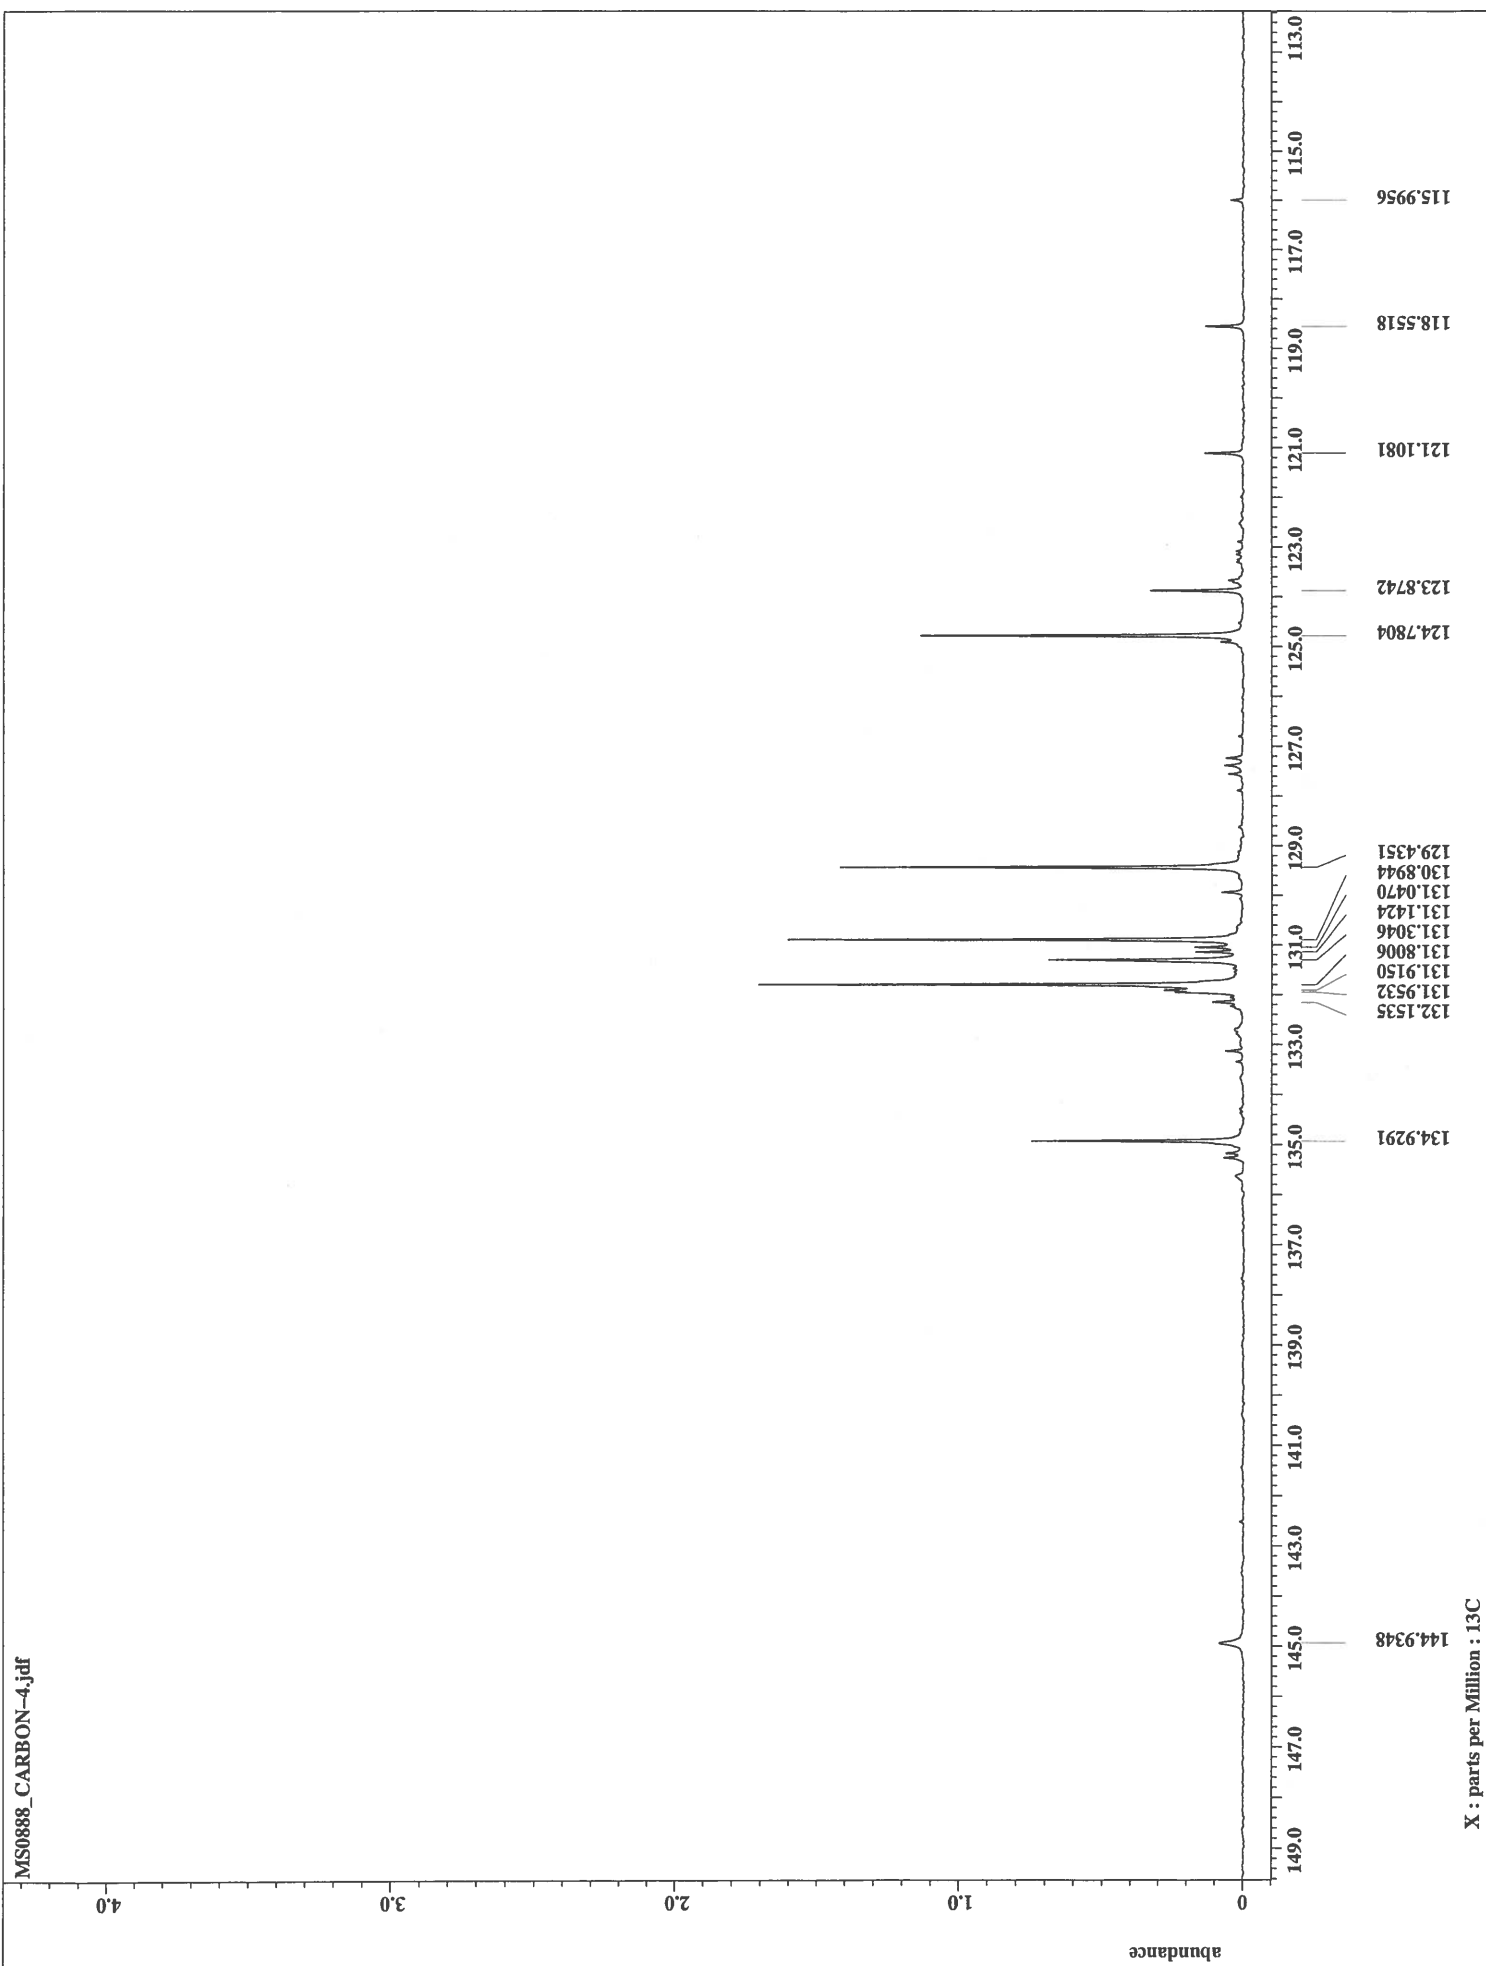



MS0888\_FLUORINE-4.jdf

40.0

30.0

20.0

10.0

0

abundance

50.0 40.0 30.0 20.0 10.0 0 -10.0 -20.0 -30.0 -40.0 -50.0 -60.0 -70.0 -80.0 -90.0 -100.0 -110.0 -120.0 -130.0 -140.0 -150.0 -160.0 -170.0 -180.0 -190.0 -200.0 -210.0 -220.0 -230.0 -240.0 250.0

-78.5981

X : parts per Million : 19F

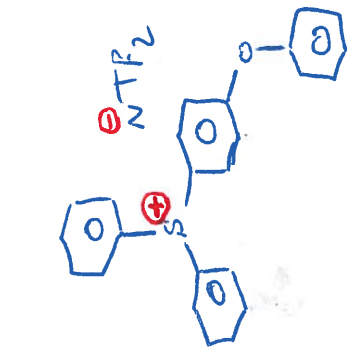

168.72

66.69

25.1

abundance

11.0 10.0 9.0 8.0 7.0 6.0 5.0 4.0 3.0 2.0 1.0 0

7.6901  
7.6351  
7.6294  
7.6191  
7.6156  
7.6110

X : parts per Million : 1H

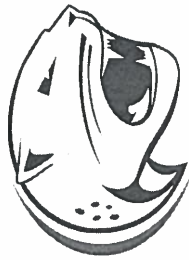SOUTH ALABAMA  
JAGUARS<sup>TM</sup>

```

Filename      = MS0886_PROTON-2.jdf
Author       = Jim Davis
Experiment    = single_pulse.ex2
Sample_id     = MS0886
Solvent       = CHLOROFORM-D
Creation_time = 29-NOV-2019 12:51:31
Revision_time = 29-NOV-2019 12:22:15
Current_time  = 29-NOV-2019 12:22:15

Data_format   = 1D COMPLEX
Dim_size      = 13107
Dim_title     = 1H
Dim_units     = [ppm]
Dimensions    = X
Site          = ECA 500
Spectrometer  = JNM-ECA500

Field_strength = 11.7473579[T] (500[MH
X_acq_duration = 1.74587904[s]
X_domain      = 1H
X_freq        = 500.15991521[MHz]
X_offset      = 5.0[ppm]
X_points      = 16384
X_prescans    = 1
X_resolution  = 0.57277737[Hz]
X_sweep       = 9.38438438[kHz]
Irr_domain    = 1H
Irr_freq      = 500.15991521[MHz]
Irr_offset    = 5.0[ppm]
Tri_domain    = 1H
Tri_freq      = 500.15991521[MHz]
Tri_offset    = 5.0[ppm]
Clipped       = FALSE
Mod_return    = 1
Scans         = 16
Total_scans   = 16

X_90_width    = 11.3[us]
X_acq_time    = 1.74587904[s]
X_angle       = 45[deg]
X_atn         = 4[dB]
X_pulse       = 5.65[us]
Irr_mode      = Off
Tri_mode      = Off
Dante_preset  = FALSE
Initial_wait  = 1[s]
Recvr_gain    = 22
Relaxation_delay = 4[s]
Repetition_time = 5.74587904[s]
Temp_get      = 19[dc]
  
```

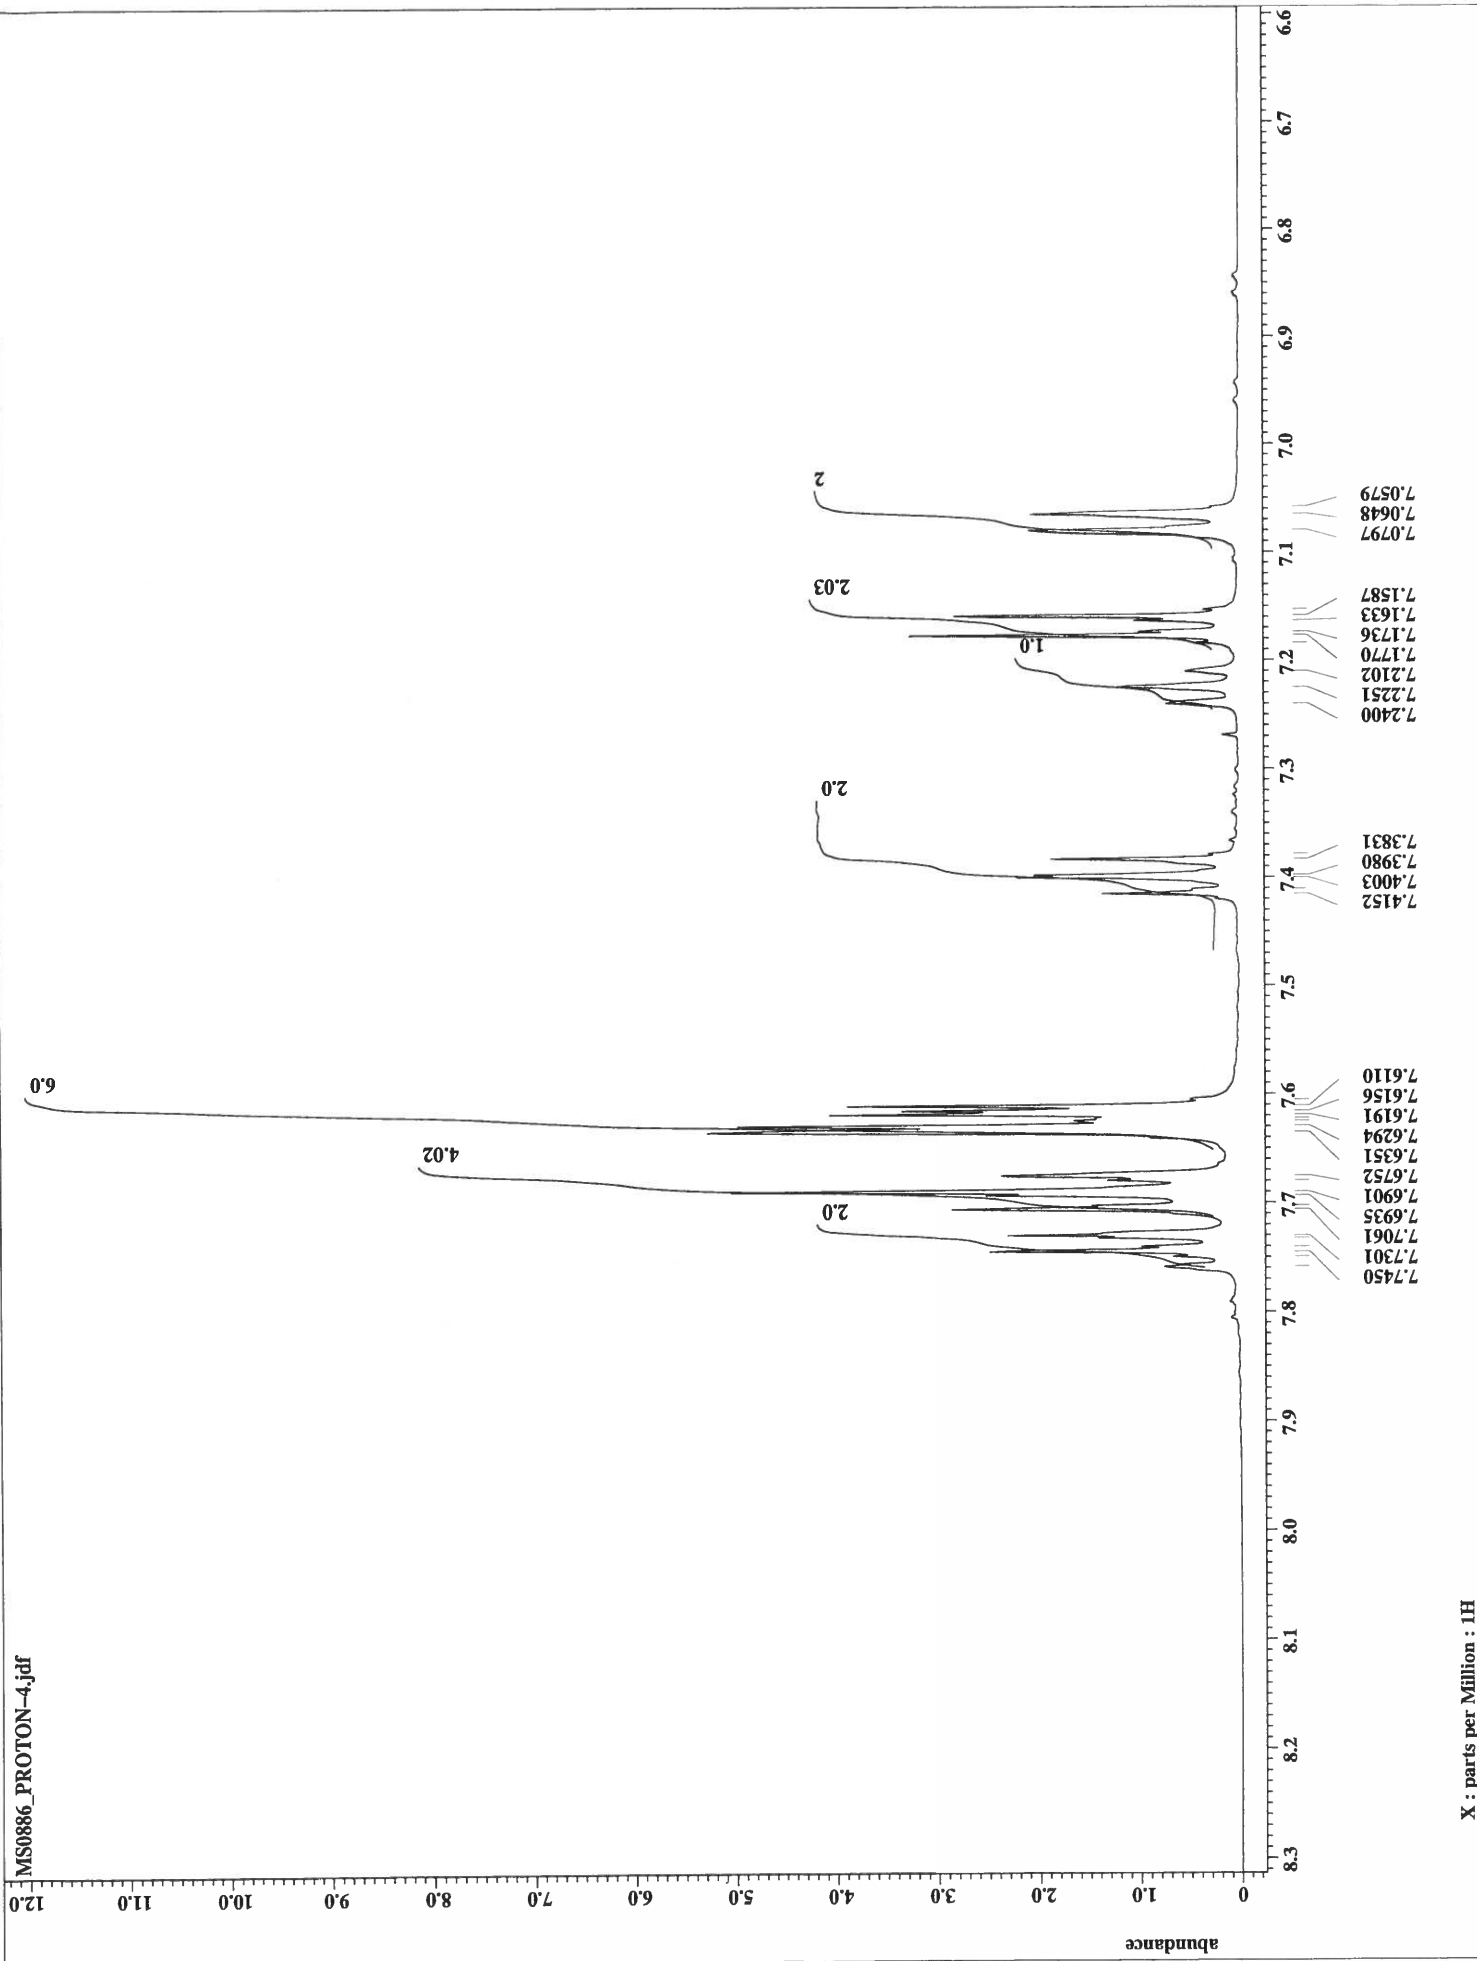

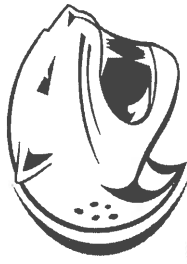

**SOUTH ALABAMA**  
**JAGUARS**™

```

= MS0886_CARBON-2.jdf
= Jim Davis
= single_pulse_dec
= MS0886
= CHLOROFORM-D
= 29-NOV-2019 13:40:22
= 29-NOV-2019 13:11:06
= 29-NOV-2019 13:11:06
= 1D COMPLEX
= 26214
= 13C
= [ppm]
= X
= ECA 500
= JNM-ECA500
= 11.7473579[T] (500[MH
= 0.83361792[s]
= 13C
= 125.76529768[MHz]
= 100[ppm]
= 32768
= 4
= 1.19959034[Hz]
= 39.3081761[KHz]
= 1H
= 500.15991521[MHz]
= 5.0[ppm]
= FALSE
= 1
= 1024
= 1024
= 13[us]
= 0.83361792[s]
= 30[deg]
= 6[db]
= 4.33333333[us]
= 21.2[db]
= 21.2[db]
= WAITZ
= TRUE
= 1[s]
= TRUE
= 2[s]
= 60
= 2[s]
= 2.83361792[s]
= 20[dc]
  
```

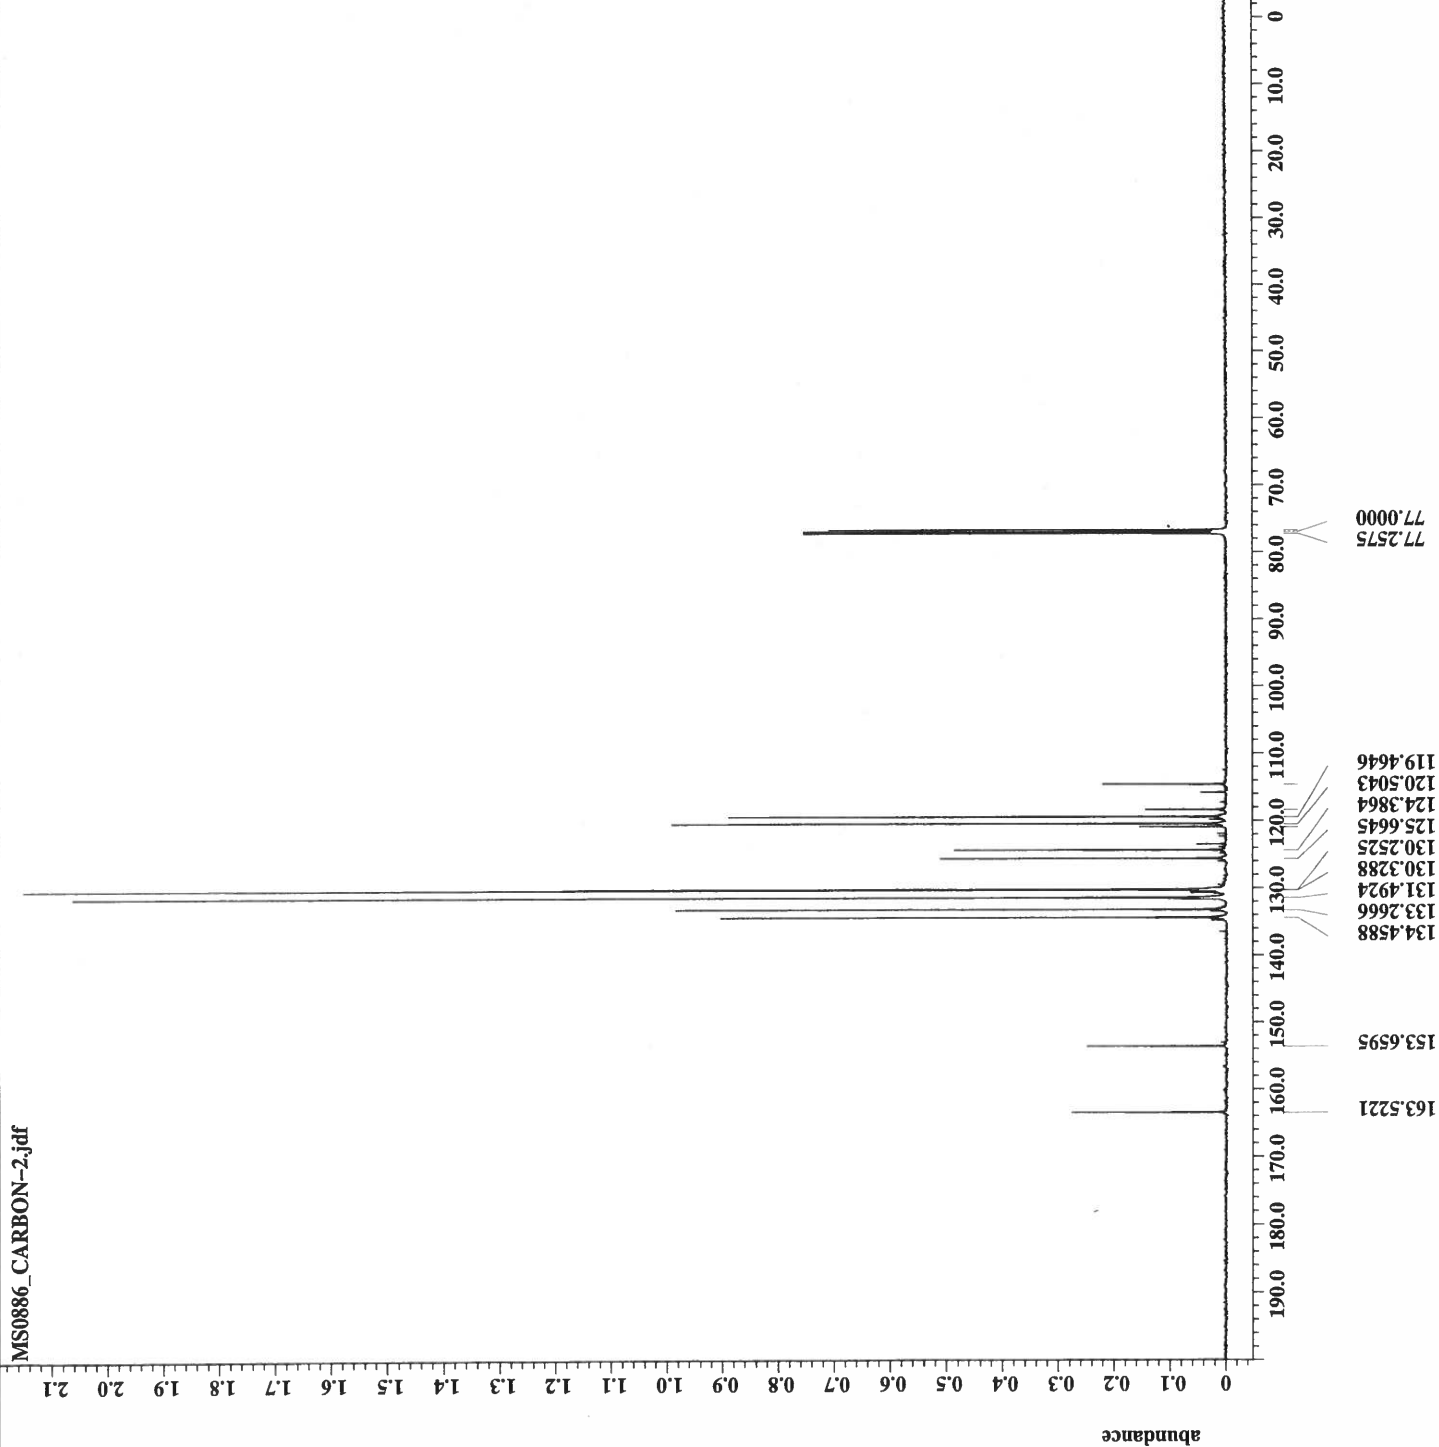

X : parts per Million : 13C

3.0

2.0

1.0

abundance

0

160.0

150.0

140.0

130.0

120.0

110.0

163,5221

153,6595

134,4588

133,2666

131,4924

130,3288

130,2525

125,6645

124,3864

123,5089

120,9526

120,5043

119,4646

118,3963

115,8400

114,6191

X : parts per Million : 13C

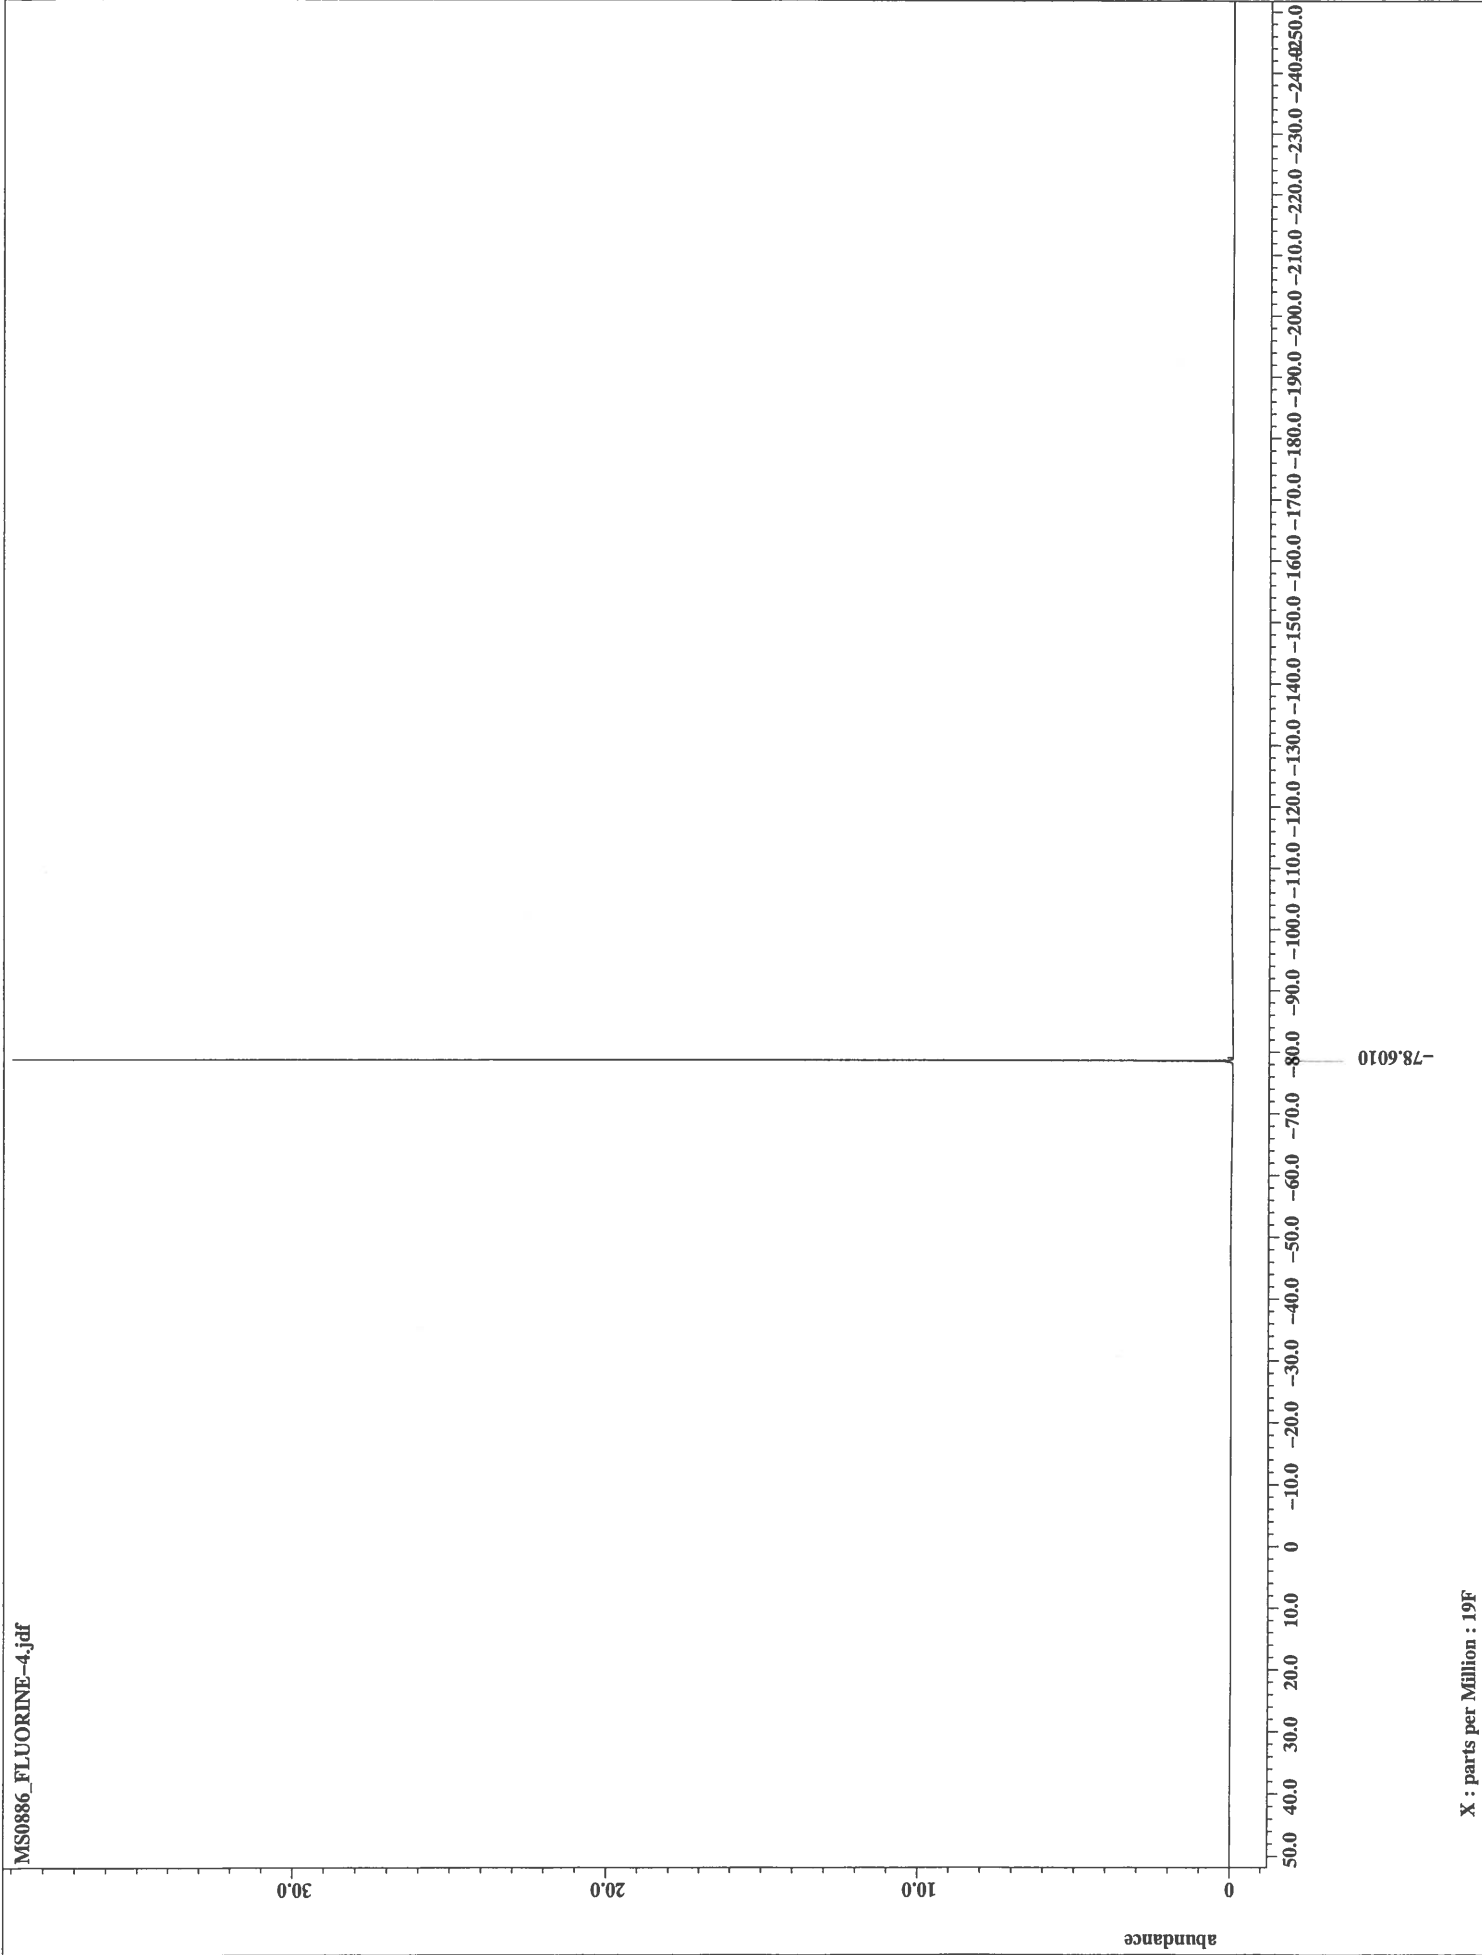

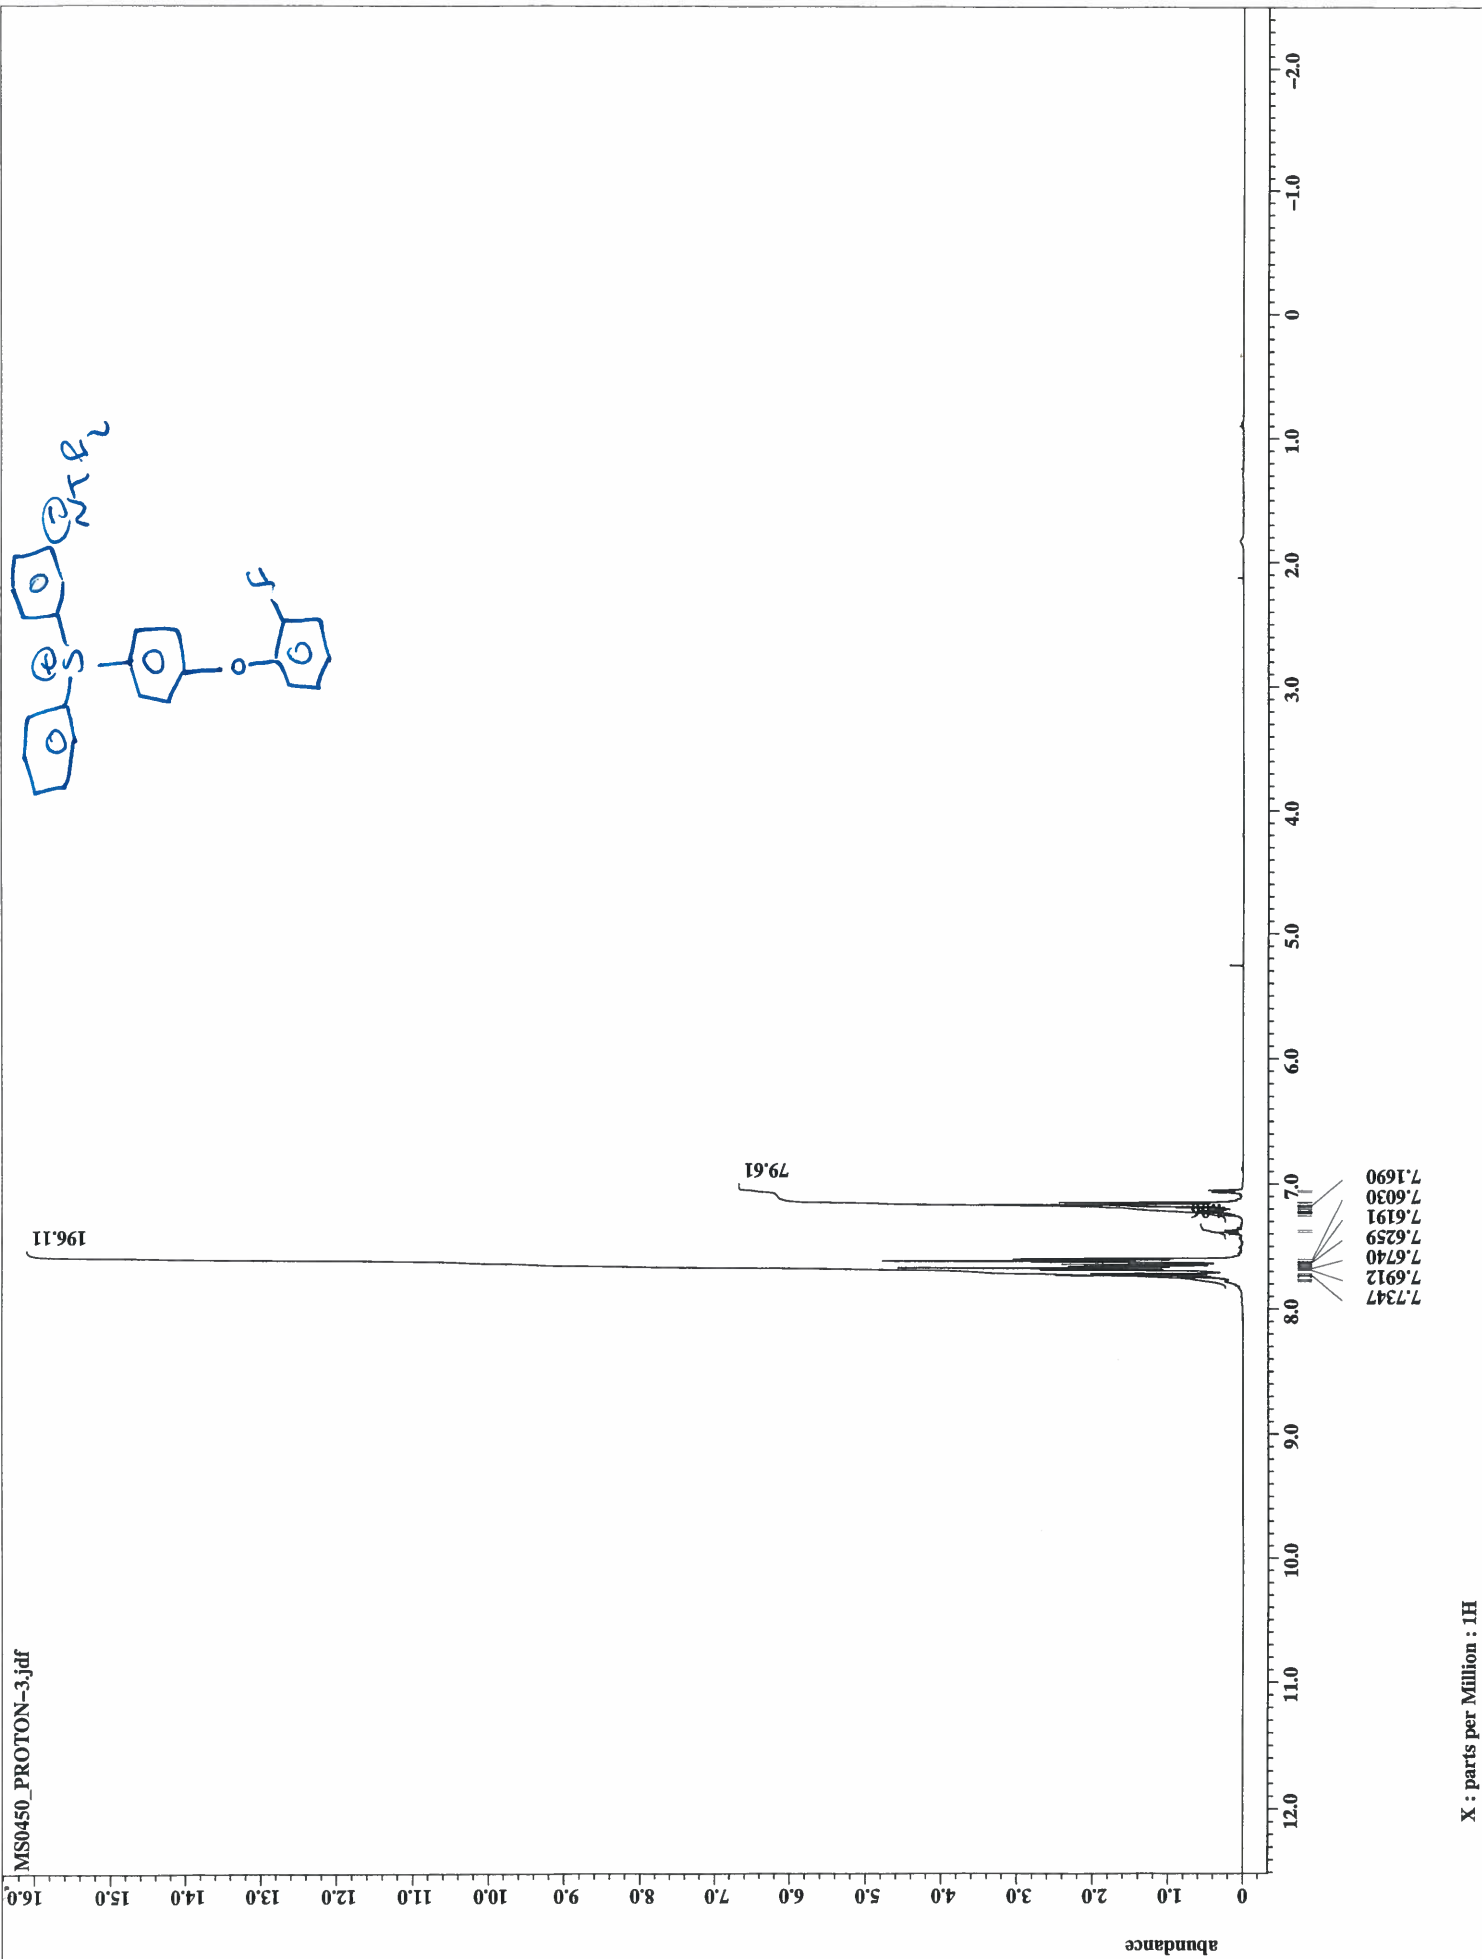

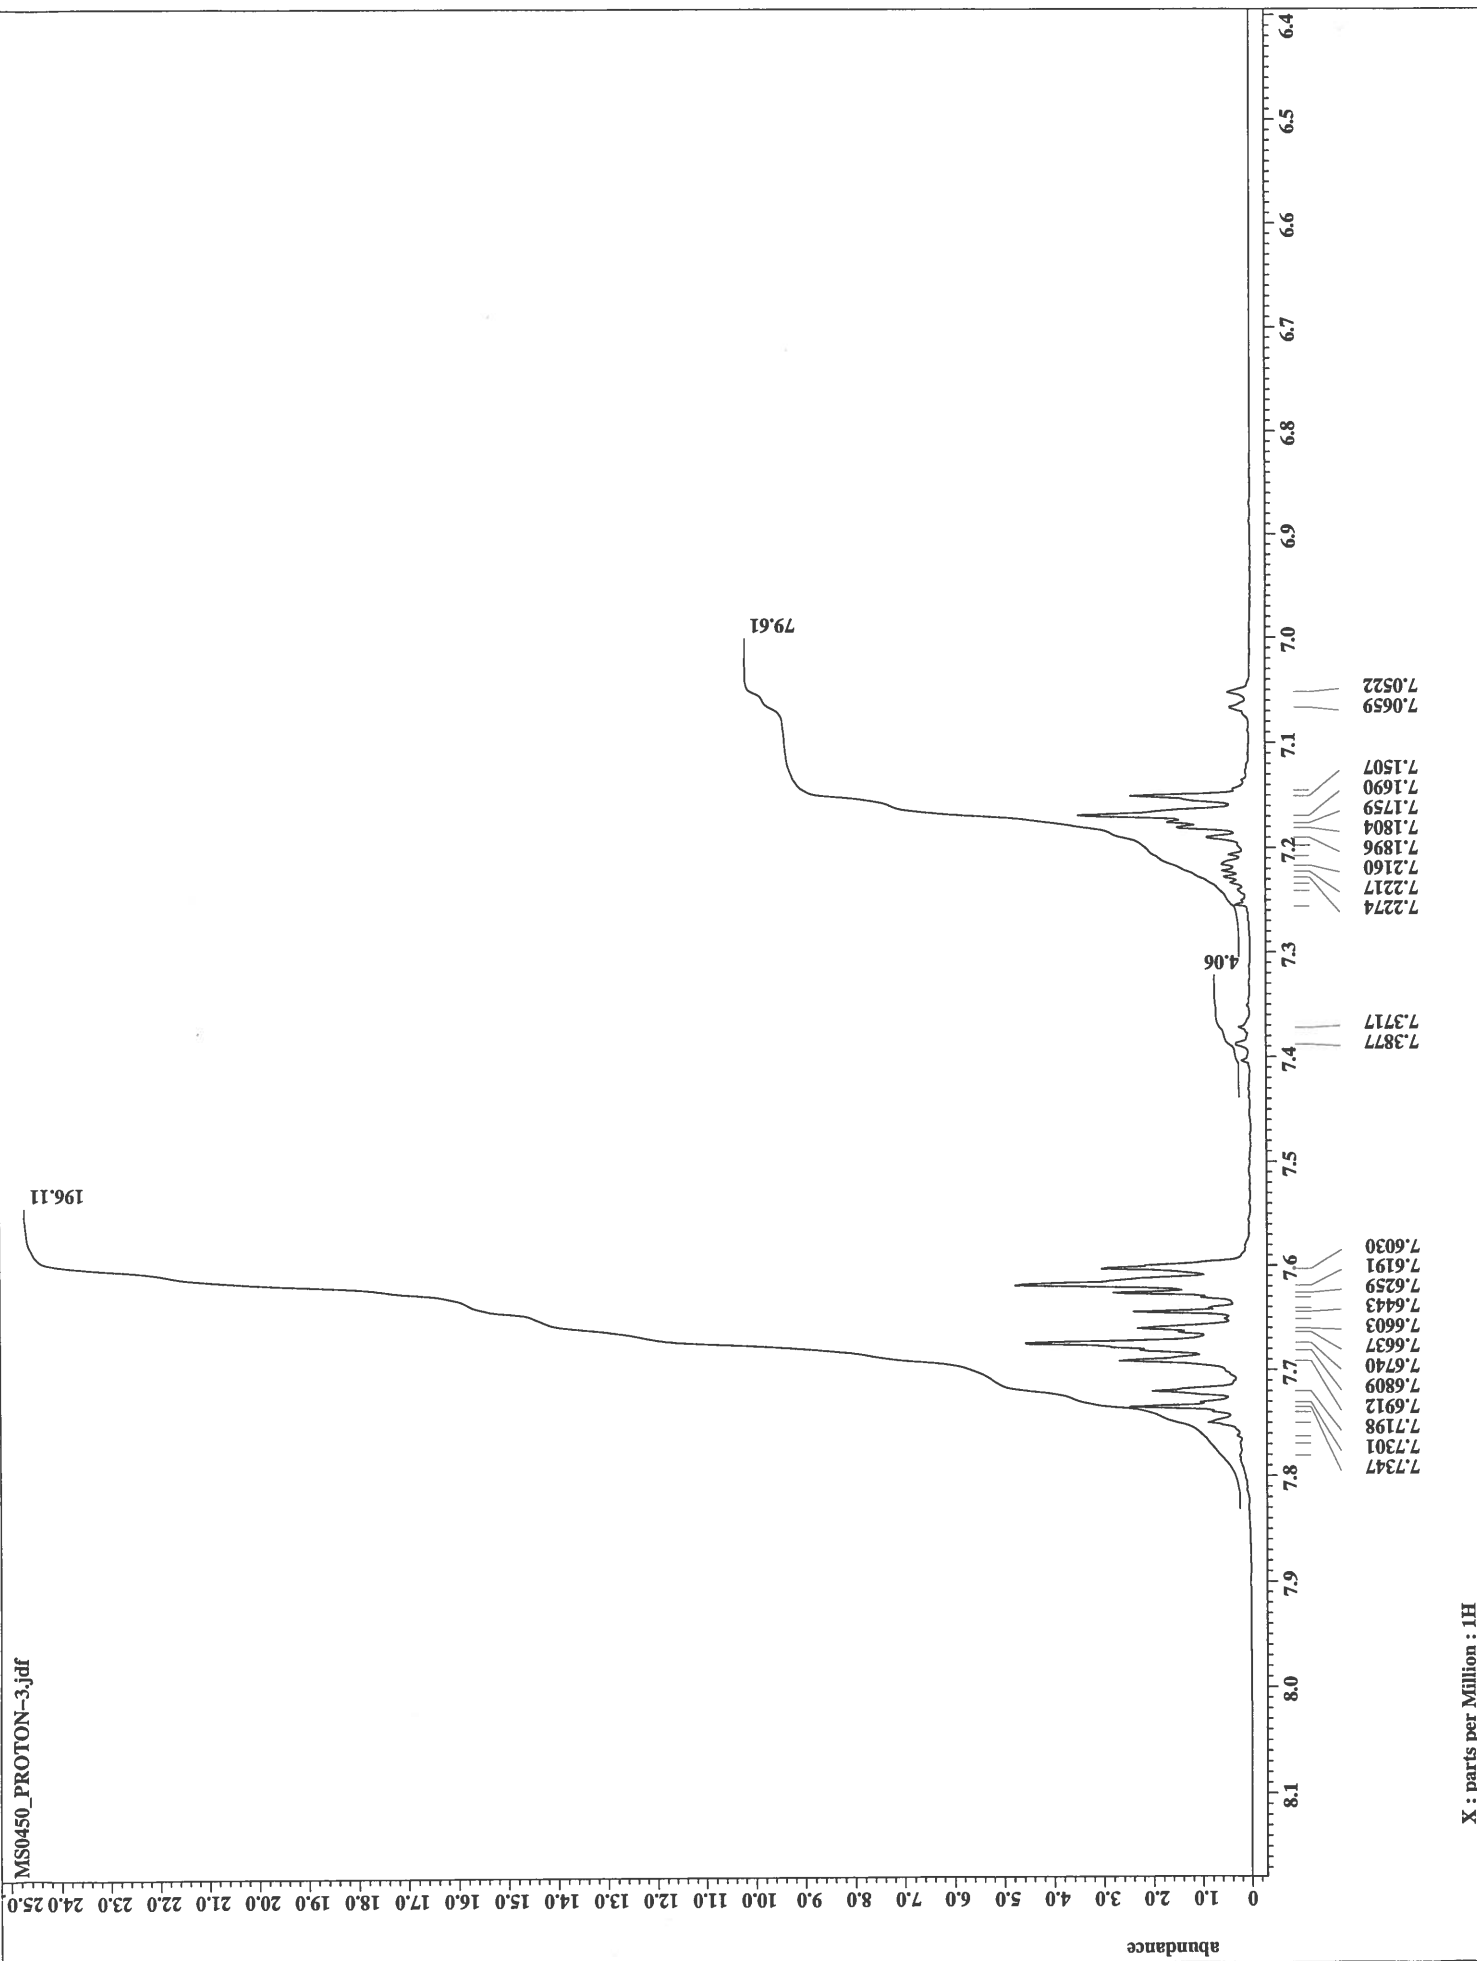



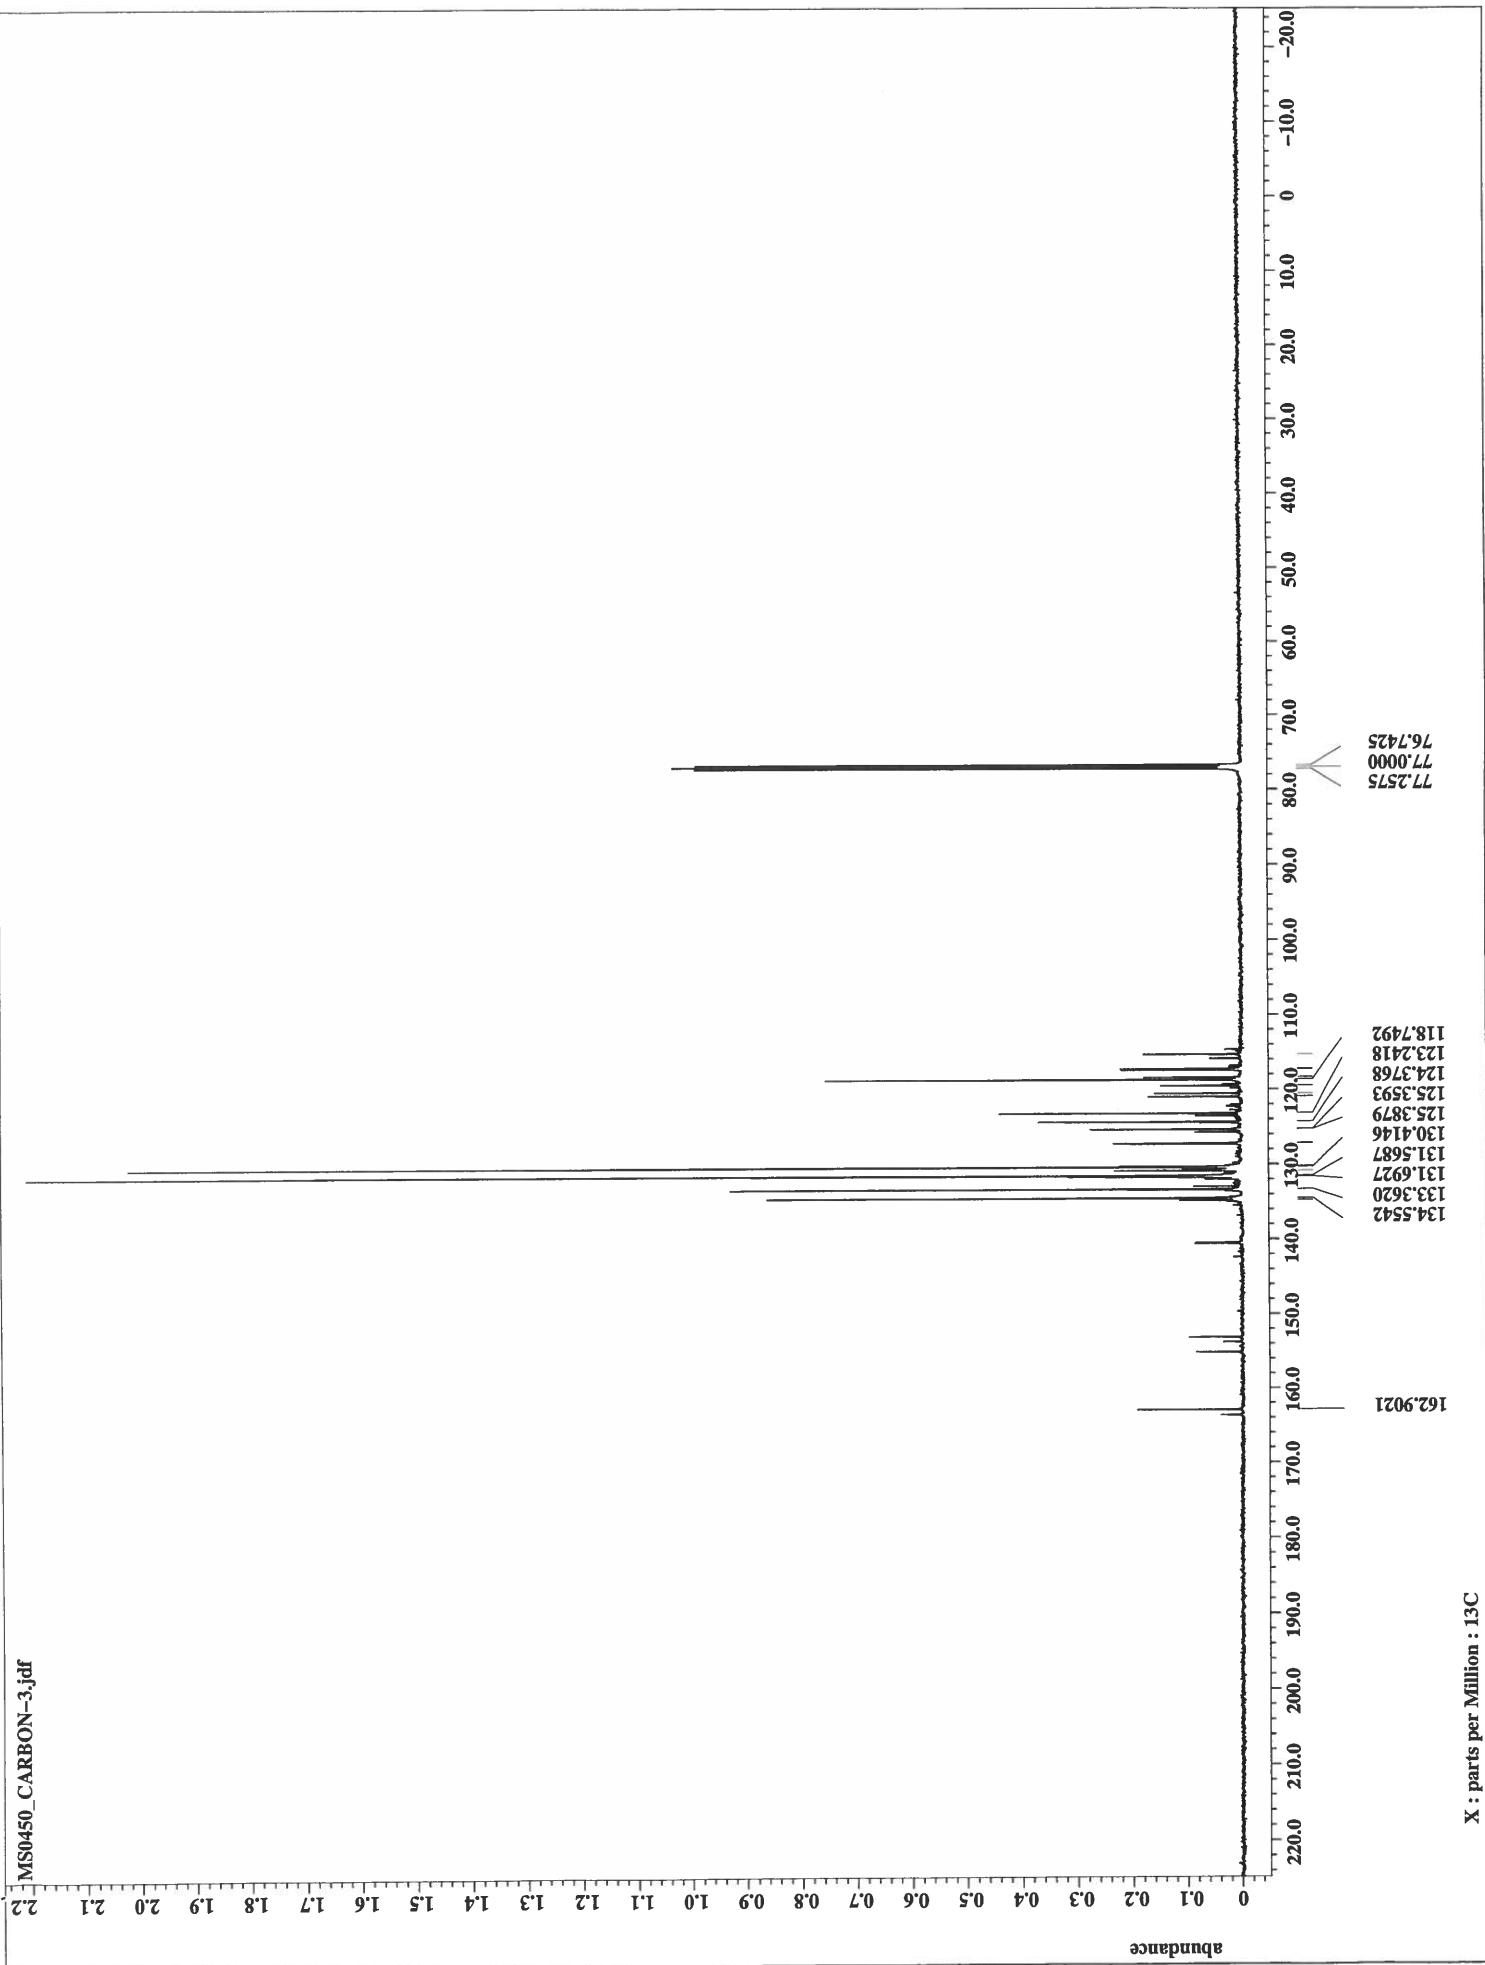

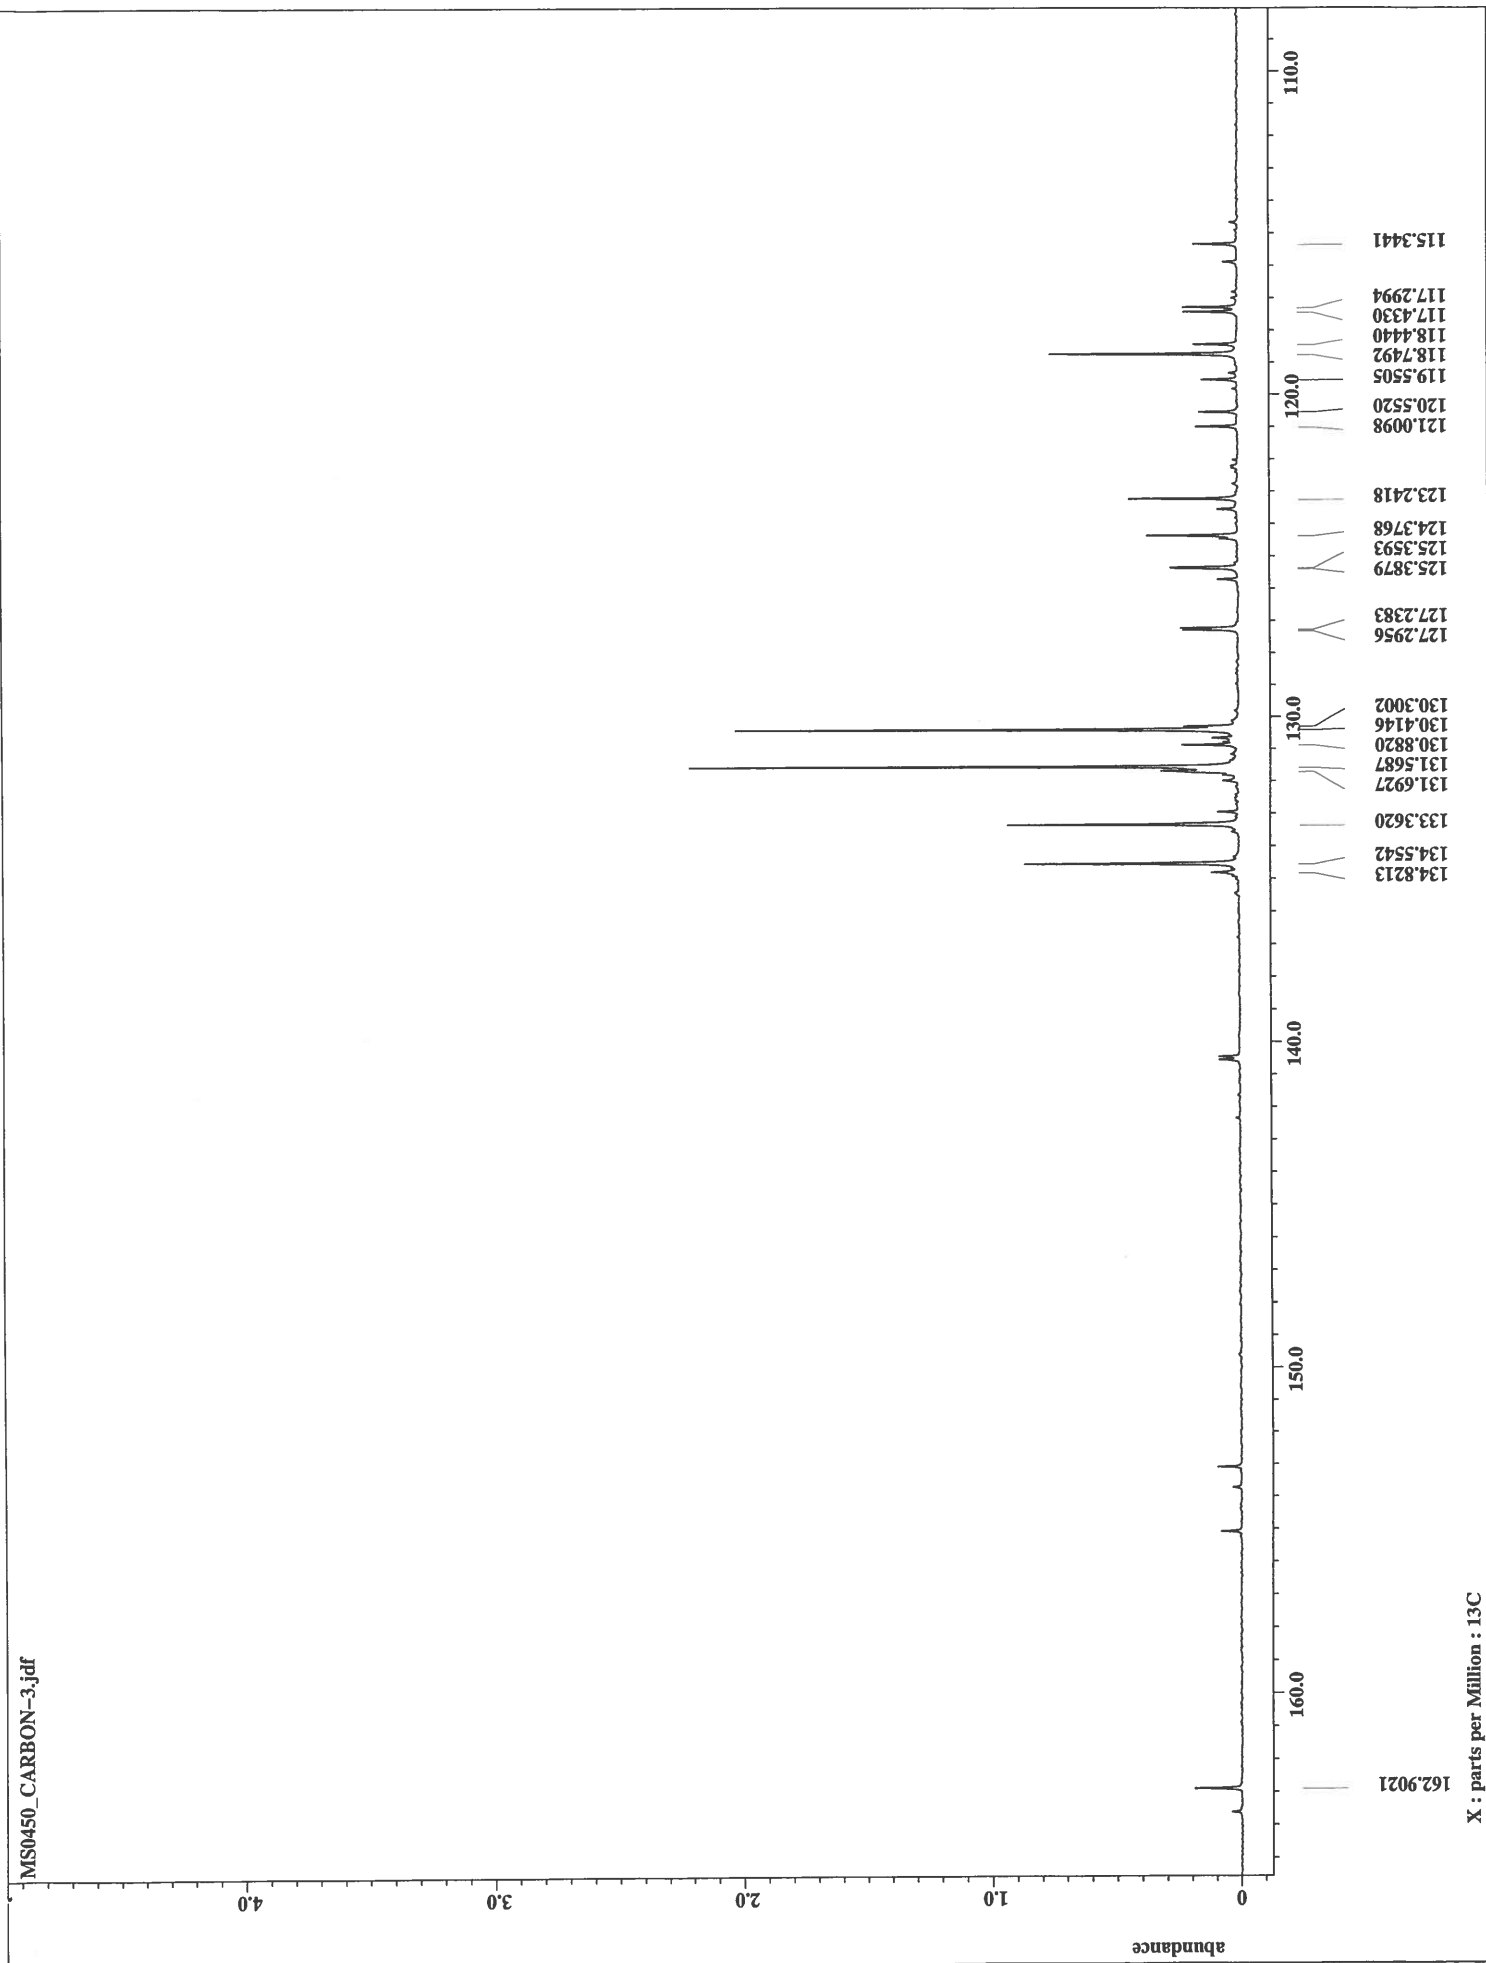

30.0

20.0

10.0

0

abundance

30.0 20.0 10.0 0 -10.0 -20.0 -30.0 -40.0 -50.0 -60.0 -70.0 -80.0 -90.0 -100.0 -110.0 -120.0 -130.0 -140.0 -150.0 -160.0 -170.0

-78.6142

187.76

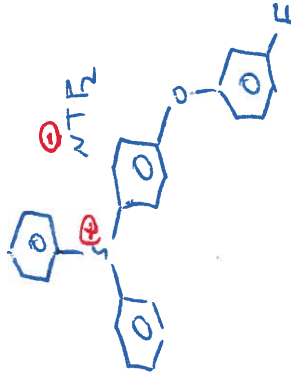

32.34

18.65

14.24

7.7187  
7.6889  
7.6706  
7.6546  
7.2400  
6.8254  
6.8071

X : parts per Million : 1H

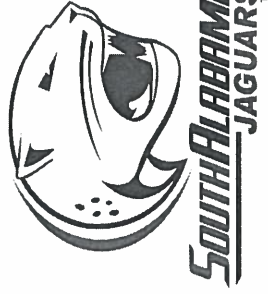

```

Filename      = MS0448_PROTON-2.jdf
Author       = Jim Davis
Experiment    = single_pulse.ex2
Sample_id    = MS0448
Solvent      = CHLOROFORM-D
Creation_time = 26-NOV-2019 12:41:31
Revision_time = 26-NOV-2019 12:12:27
Current_time  = 26-NOV-2019 12:12:27

Data_format  = 1D COMPLEX
Dim_size     = 13107
Dim_title    = 1H
Dim_units    = [ppm]
Dimensions   = X
Site         = ECA 500
Spectrometer = JNM-ECA500

Field_strength = 11.7473579[T] (500[MH
X_acq_duration = 1.74587904[s]
X_domain       = 1H
X_freq         = 500.15991521[MHz]
X_offset       = 5.0[ppm]
X_points       = 16384
X_prescans     = 1
X_resolution   = 0.57277737[Hz]
X_sweep        = 9.38438438[kHz]
Irr_domain     = 1H
Irr_freq       = 500.15991521[MHz]
Irr_offset     = 5.0[ppm]
Tri_domain     = 1H
Tri_freq       = 500.15991521[MHz]
Tri_offset     = 5.0[ppm]
Clipped        = FALSE
Mod_return     = 1
Scans          = 16
Total_scans    = 16

X_90_width     = 11.3[us]
X_acq_time     = 1.74587904[s]
X_angle        = 45[deg]
X_atn          = 4[db]
X_pulse        = 5.65[us]
Irr_mode       = Off
Tri_mode       = Off
Dante_preset   = FALSE
Initial_wait   = 1[s]
Recvr_gain     = 24
Relaxation_delay = 4[s]
Repetition_time = 5.74587904[s]
Temp_get       = 19.4[dc]
  
```

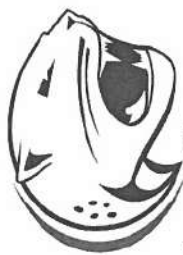

**SOUTH ALABAMA**  
**JAGUARS**

```

= MS0448_CARBON-2.jdf
= Jim Davis
= single_pulse_dec
= MS0448
= CHLOROFORM-D
= 26-NOV-2019 13:01:16
= 26-NOV-2019 12:32:12
= 26-NOV-2019 12:32:12
= 1D COMPLEX
= 26214
= 13C
= [ppm]
= X
= ECA 500
= JNM-ECA500
= 11.7473579[T] (500[MHz]
= 0.83361792[s]
= 13C
= 125.76529768[MHz]
= 100[ppm]
= 32768
= 4
= 1.19959034[Hz]
= 39.3081761[MHz]
= 1H
= 500.15991521[MHz]
= 5.0[ppm]
= FALSE
= 1
= 400
= 400
= 13[us]
= 0.83361792[s]
= 30[deg]
= 6[db]
= 4.33333333[us]
= 21.2[db]
= 21.2[db]
= WALTZ
= TRUE
= 1[s]
= TRUE
= 2[s]
= 60
= 2[s]
= 2.83361792[s]
= 19.6[dc]
  
```

```

Filename
Author
Experiment
Sample_id
Solvent
Creation_time
Revision_time
Current_time
  
```

```

Data_format
Dim_size
Dim_title
Dim_units
Dimensions
Site
Spectrometer
  
```

```

Field_strength
X_acq_duration
X_domain
X_freq
X_offset
X_points
X_prescans
X_resolution
X_sweep
Irr_domain
Irr_freq
Irr_offset
Clipped
Mod_return
Scans
Total_scans
  
```

```

X_90_width
X_acq_time
X_angle
X_atn
X_pulse
Irr_atn_dec
Irr_atn_noe
Irr_noise
Decoupling
Initial_wait
Noe
Noe_time
Recvr_gain
Relaxation_delay
Repetition_time
Temp_get
  
```

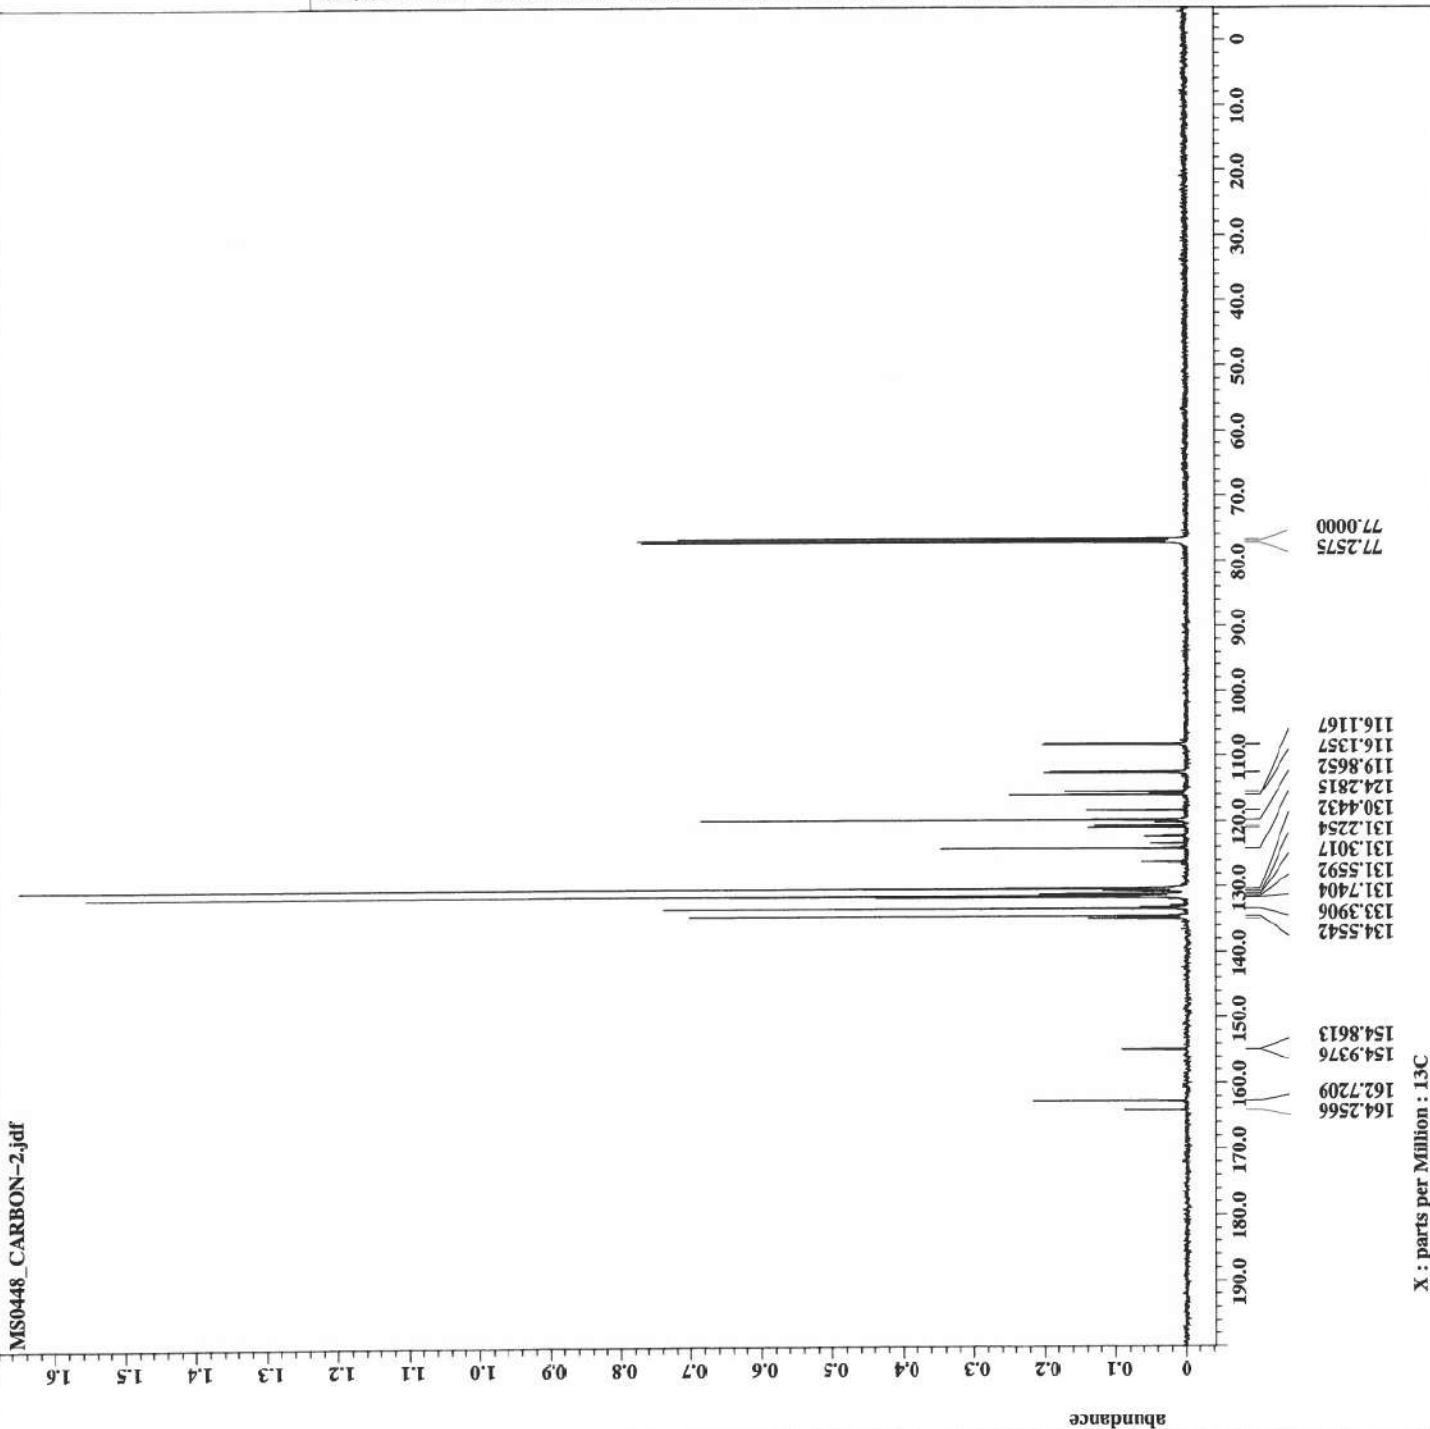

X : parts per Million : 13C

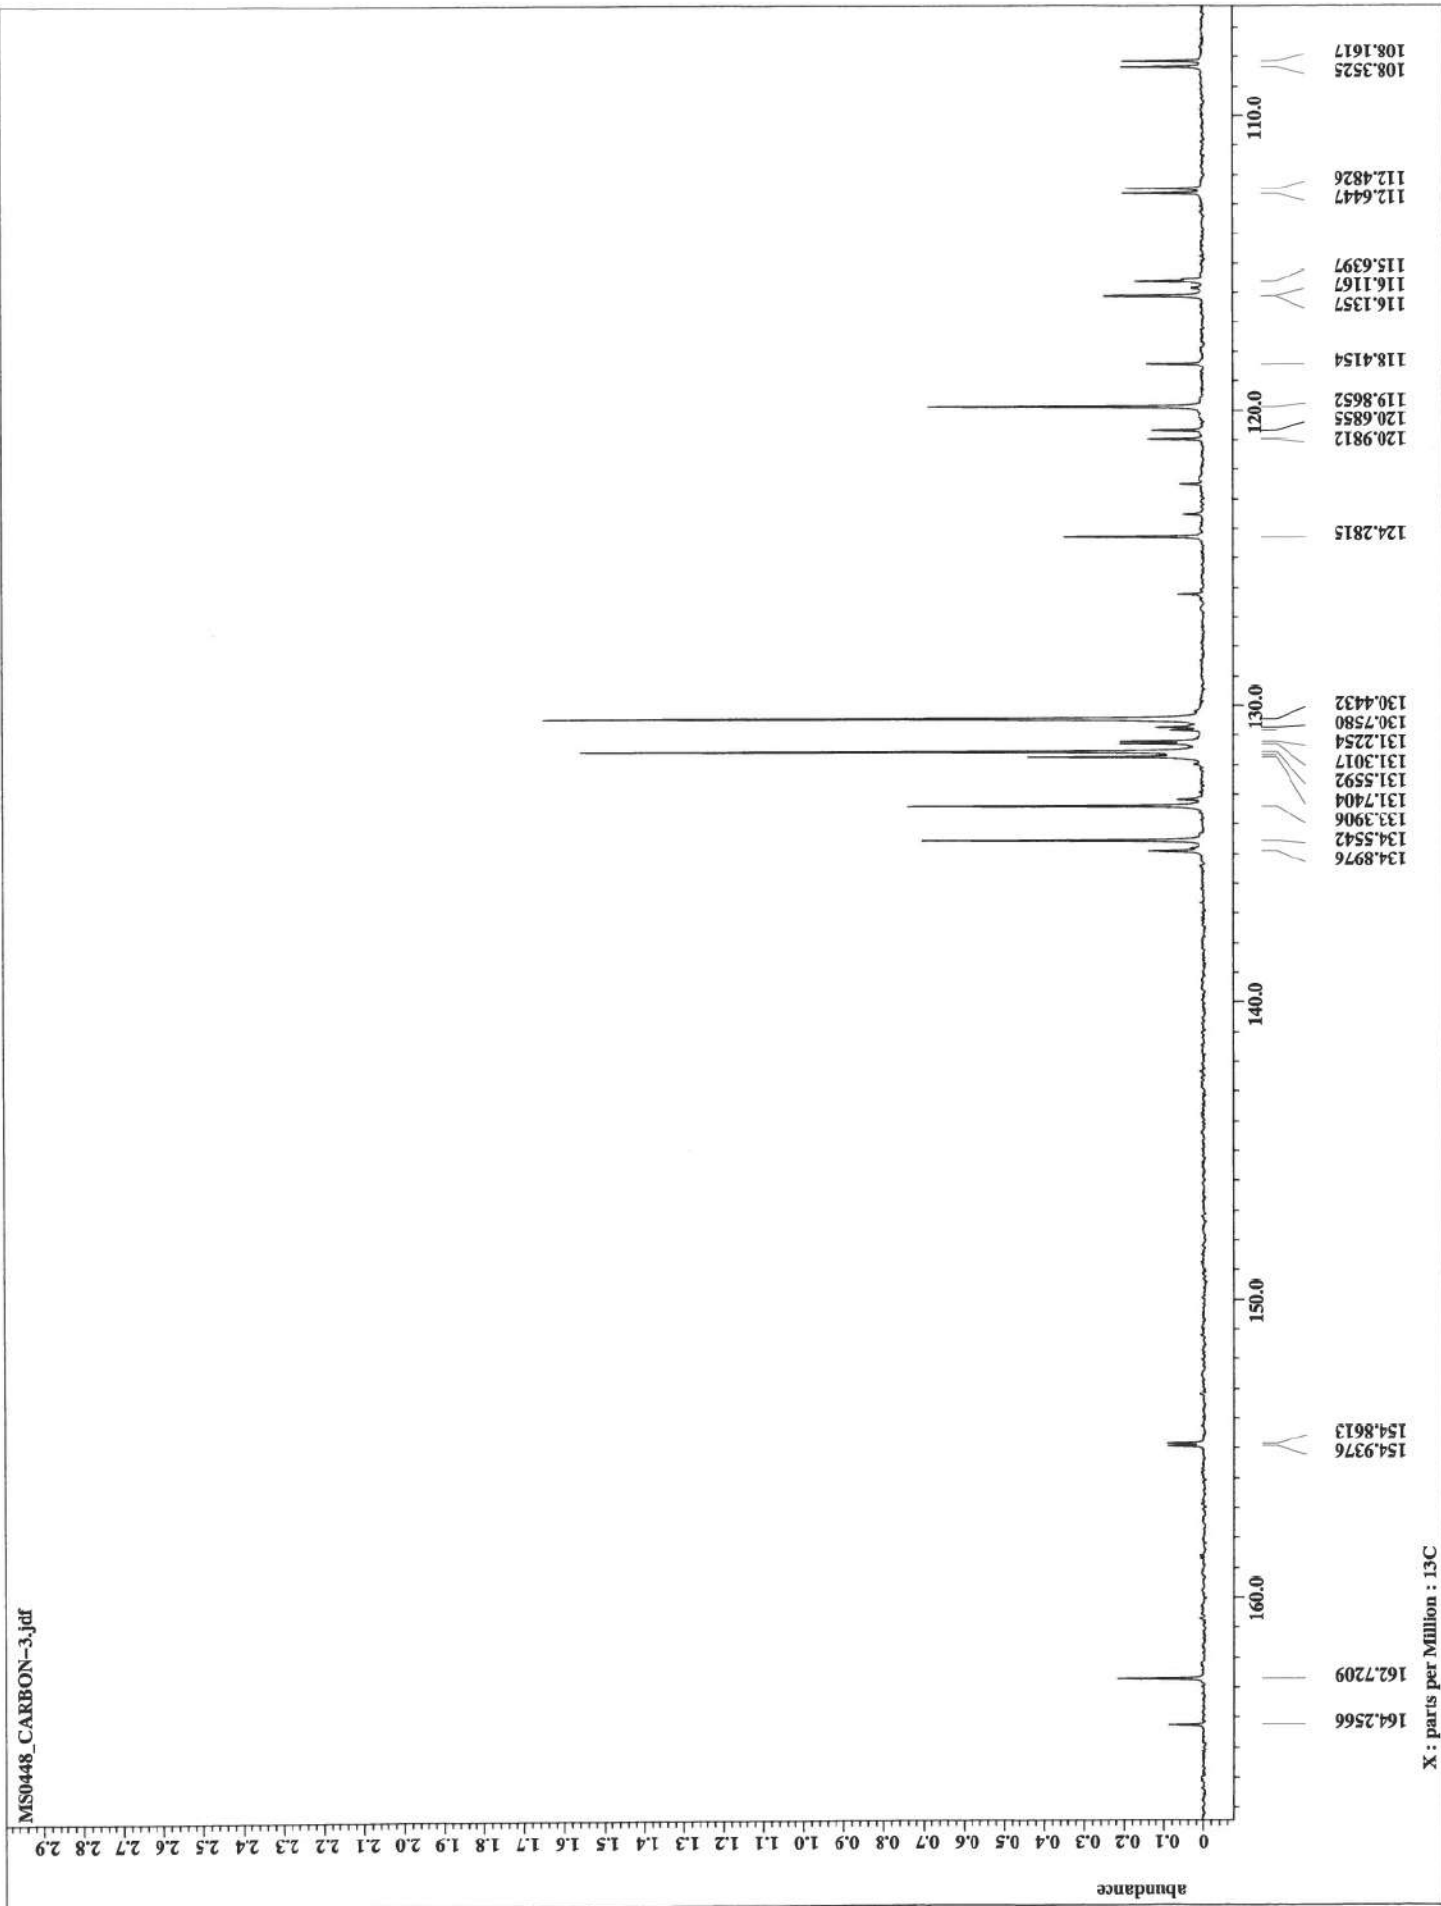

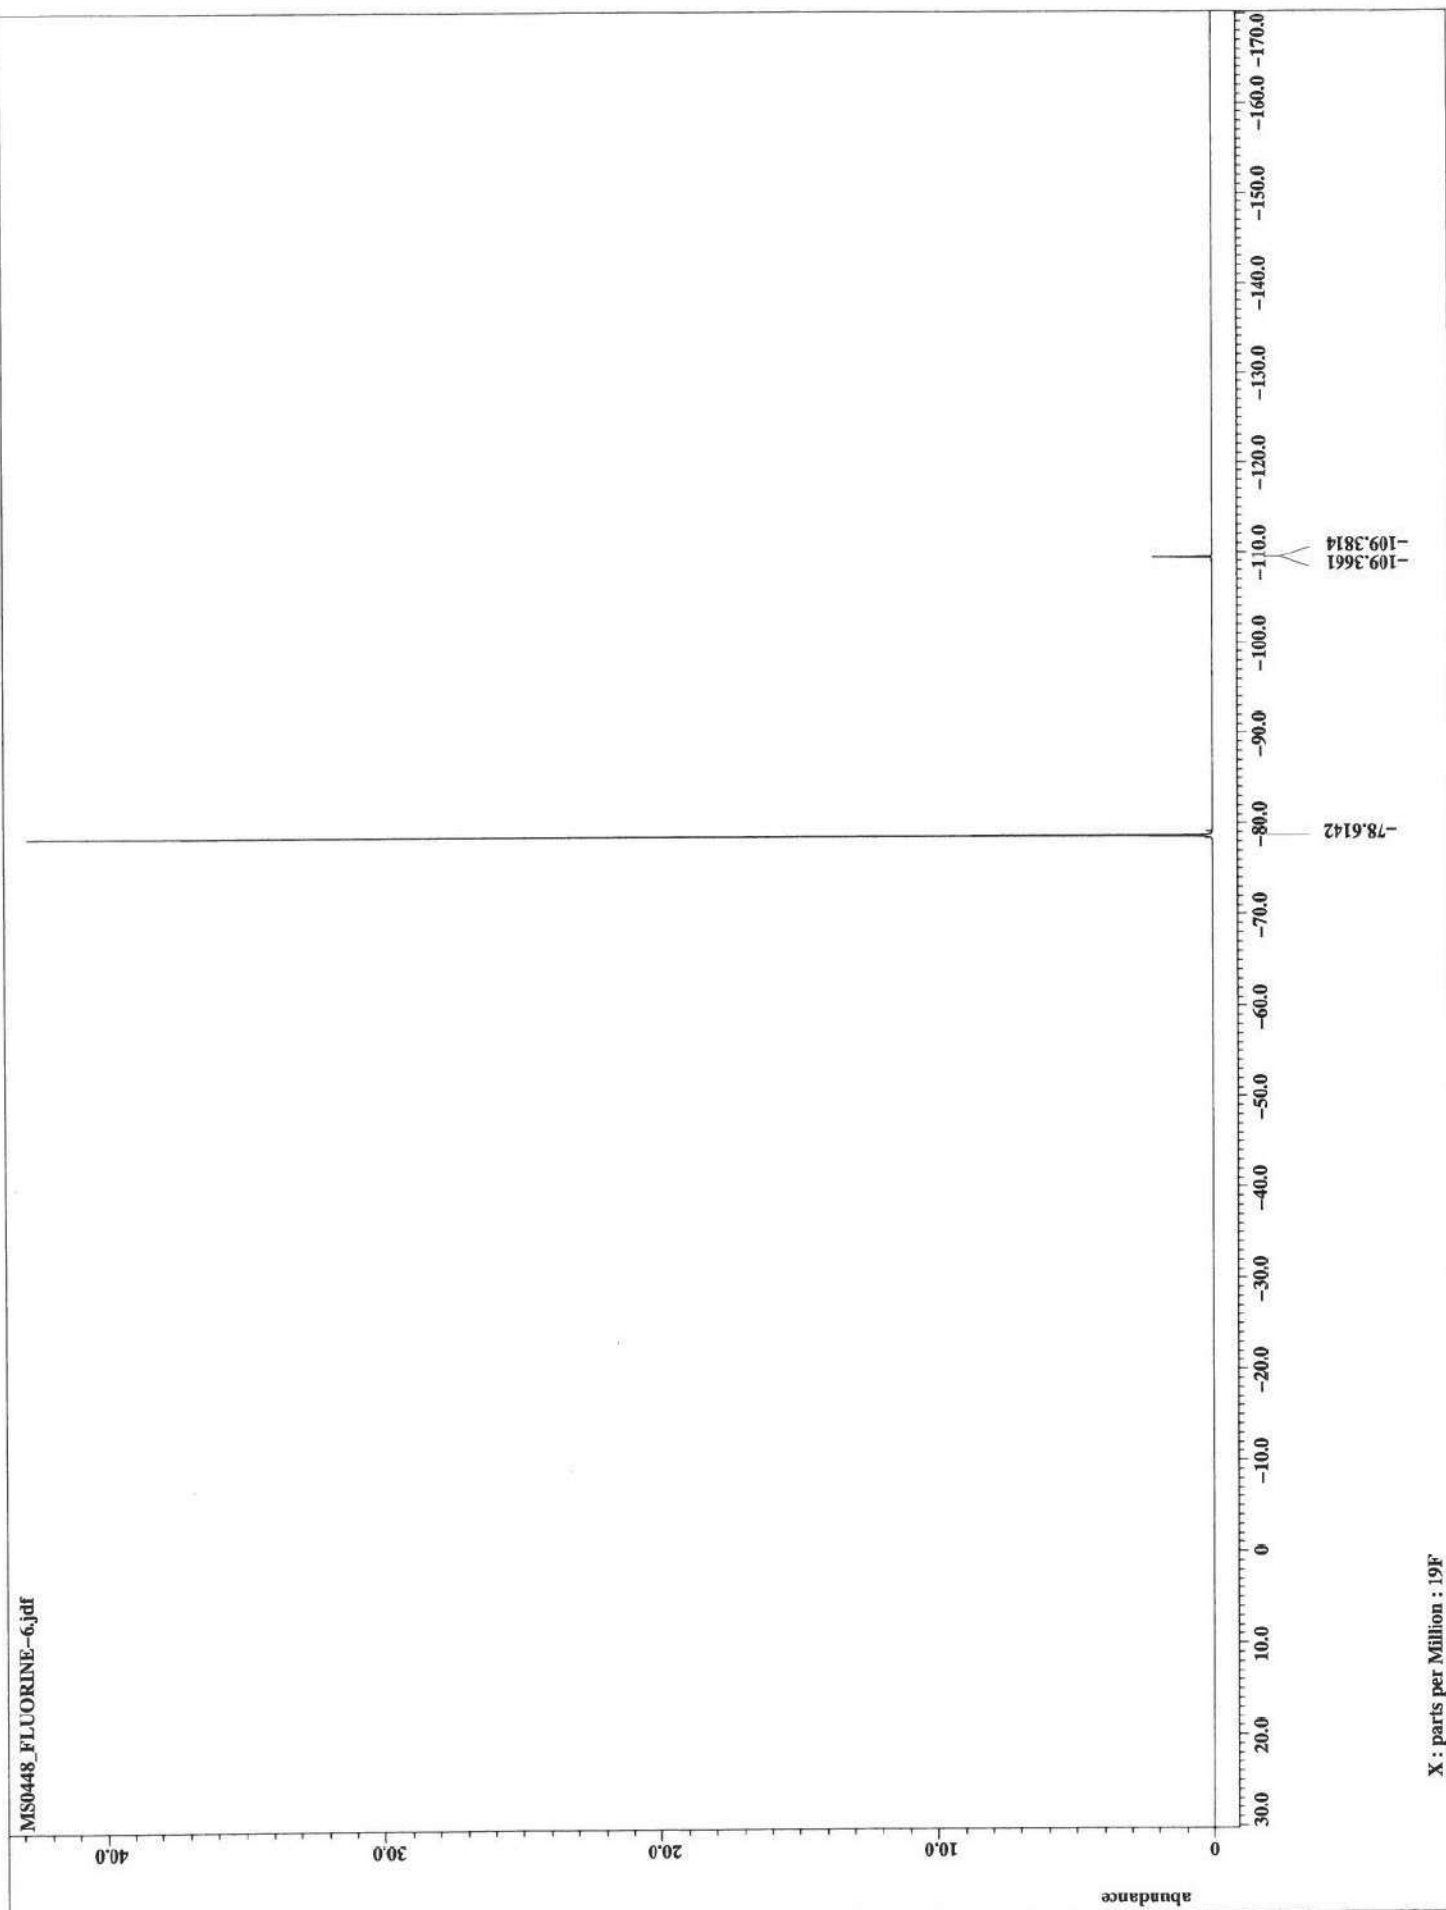

179.58

78.98

7.7634  
7.7095  
7.6923  
7.2400  
7.1472  
7.1346

X : parts per Million : 1H

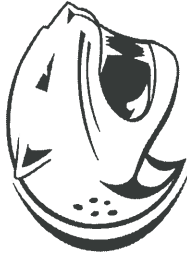

**SOUTH ALABAMA**  
**JAGUARS**

Filename = MS0421\_PROTON-2.jdf  
 Author = Jim Davis  
 Experiment = single\_pulse.ex2  
 Sample\_id = MS0421  
 Solvent = CHLOROFORM-D  
 Changer\_sample = 1  
 Creation\_time = 18-APR-2018 10:34:59  
 Revision\_time = 18-APR-2018 10:12:47  
 Current\_time = 18-APR-2018 10:12:47  
 Data\_format = 1D COMPLEX  
 Dim\_size = 13107  
 Dim\_title = 1H  
 Dim\_units = [ppm]  
 Dimensions = X  
 Site = ECA 500  
 Spectrometer = JNM-ECA500  
 Field\_strength = 11.7473579 [T] (500 [MH  
 X\_acq\_duration = 1.74587904 [s]  
 X\_domain = 1H  
 X\_freq = 500.15991521 [MHz]  
 X\_offset = 5.0 [ppm]  
 X\_points = 16384  
 X\_prescans = 1  
 X\_resolution = 0.57277737 [Hz]  
 X\_sweep = 9.38438438 [kHz]  
 Irr\_domain = 1H  
 Irr\_freq = 500.15991521 [MHz]  
 Irr\_offset = 5.0 [ppm]  
 Tri\_domain = 1H  
 Tri\_freq = 500.15991521 [MHz]  
 Tri\_offset = 5.0 [ppm]  
 Clipped = FALSE  
 Mod\_return = 1  
 Scans = 16  
 Total\_scans = 16  
 X\_90\_width = 12.4 [us]  
 X\_acq\_time = 1.74587904 [s]  
 X\_angle = 45 [deg]  
 X\_atn = 4 [db]  
 X\_pulse = 6.2 [us]  
 Irr\_mode = Off  
 Tri\_mode = Off  
 Dante\_presat = FALSE  
 Initial\_wait = 1 [s]  
 Recvr\_gain = 22  
 Relaxation\_delay = 4 [s]  
 Repetition\_time = 5.74587904 [s]  
 Temp\_get = 22.7 [dC]

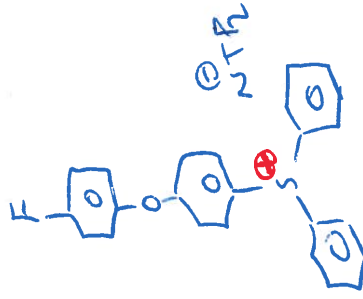



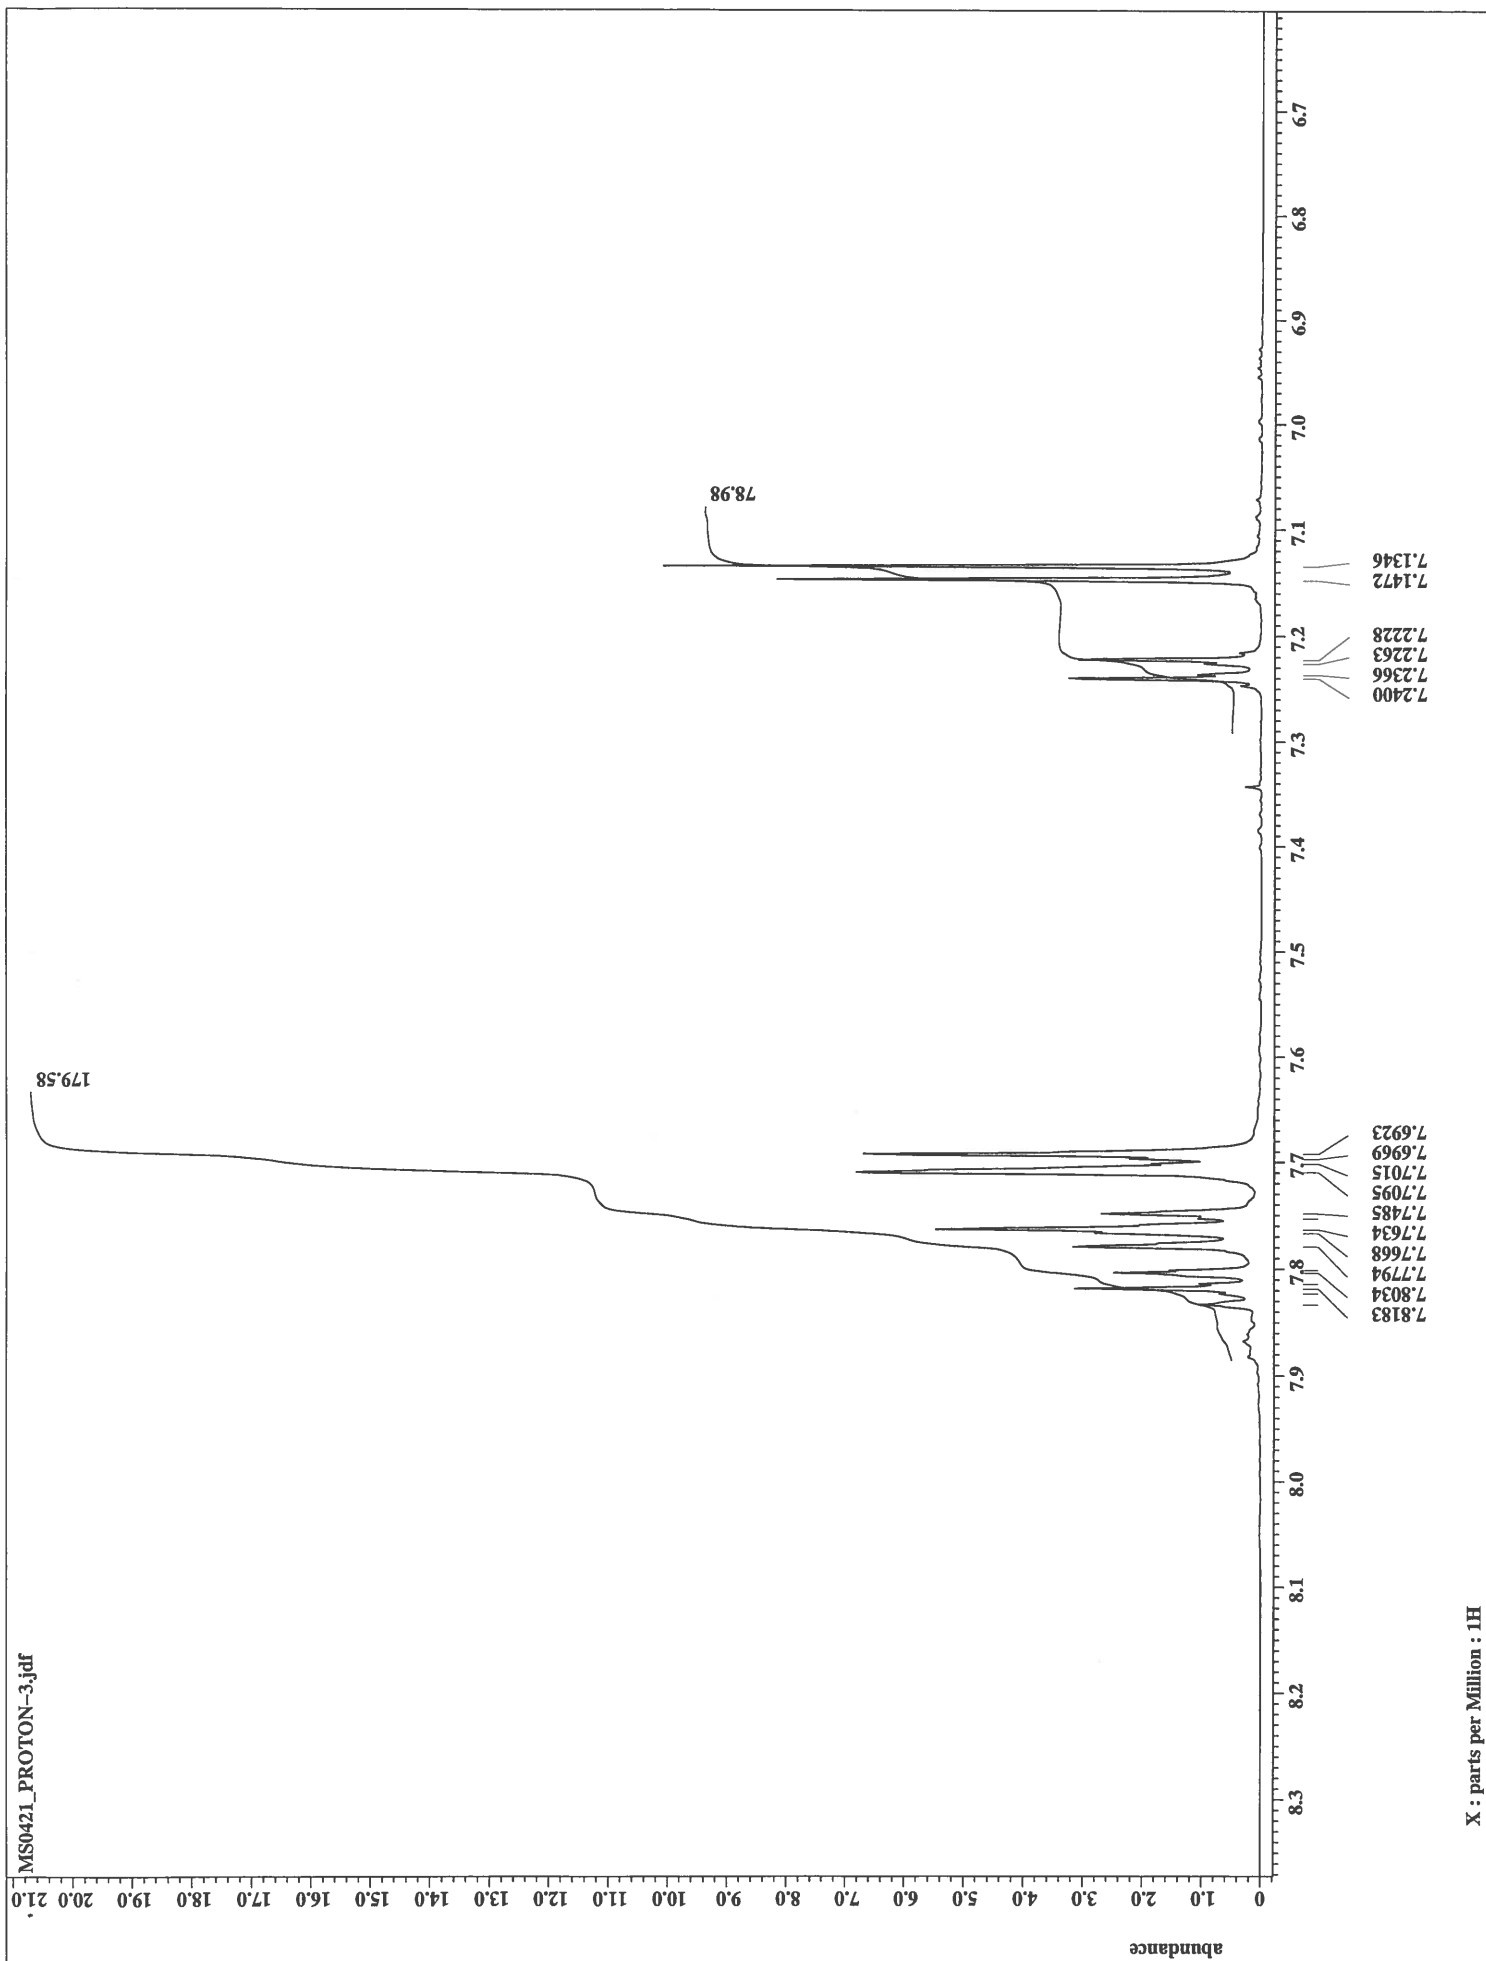

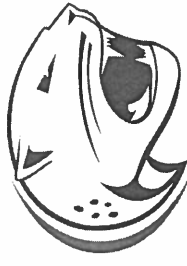

**SOUTH ALABAMA**  
**JAGUARS**

```

Filename      = MS0421_CARBON-2.jdf
Author       = Jim Davis
Experiment   = single_pulse_dec
Sample_id    = MS0421
Solvent      = CHLOROFORM-D
Charger_sample = 1
Creation_time   = 18-APR-2018 10:49:35
Revision_time  = 18-APR-2018 10:27:22
Current_time   = 18-APR-2018 10:27:22

Data_format  = 1D COMPLEX
Dim_size     = 26214
Dim_title    = 13C
Dim_units    = [ppm]
Dimensions   = X
Site         = ECA 500
Spectrometer = JNM-ECA500

Field_strength = 11.7473579 [T] (500 [MH
X_acq_duration = 0.83361792 [s]
X_domain       = 13C
X_freq         = 125.76529768 [MHz]
X_offset       = 100 [ppm]
X_points       = 32768
X_prescans     = 4
X_resolution   = 1.19959034 [Hz]
X_sweep        = 39.3081761 [kHz]
Irr_domain     = 1H
Irr_freq       = 500.15991521 [MHz]
Irr_offset     = 5.0 [ppm]
Clipped        = FALSE
Mod_return     = 1
Scans          = 256
Total_scans    = 256

X_90_width     = 13.2 [us]
X_acq_time     = 0.83361792 [s]
X_angle        = 30 [deg]
X_atn          = 6 [dB]
X_pulse        = 4.4 [us]
Irr_atn_dec    = 20.7 [dB]
Irr_atn_noe    = 20.7 [dB]
Irr_noise      = WALTZ
Decoupling     = TRUE
Initial_wait    = 1 [s]
Noe            = TRUE
Noe_time       = 2 [s]
Recvr_gain     = 60
Relaxation_delay = 2 [s]
Repetition_time = 2.83361792 [s]
Temp_get       = 23.4 [dC]
  
```

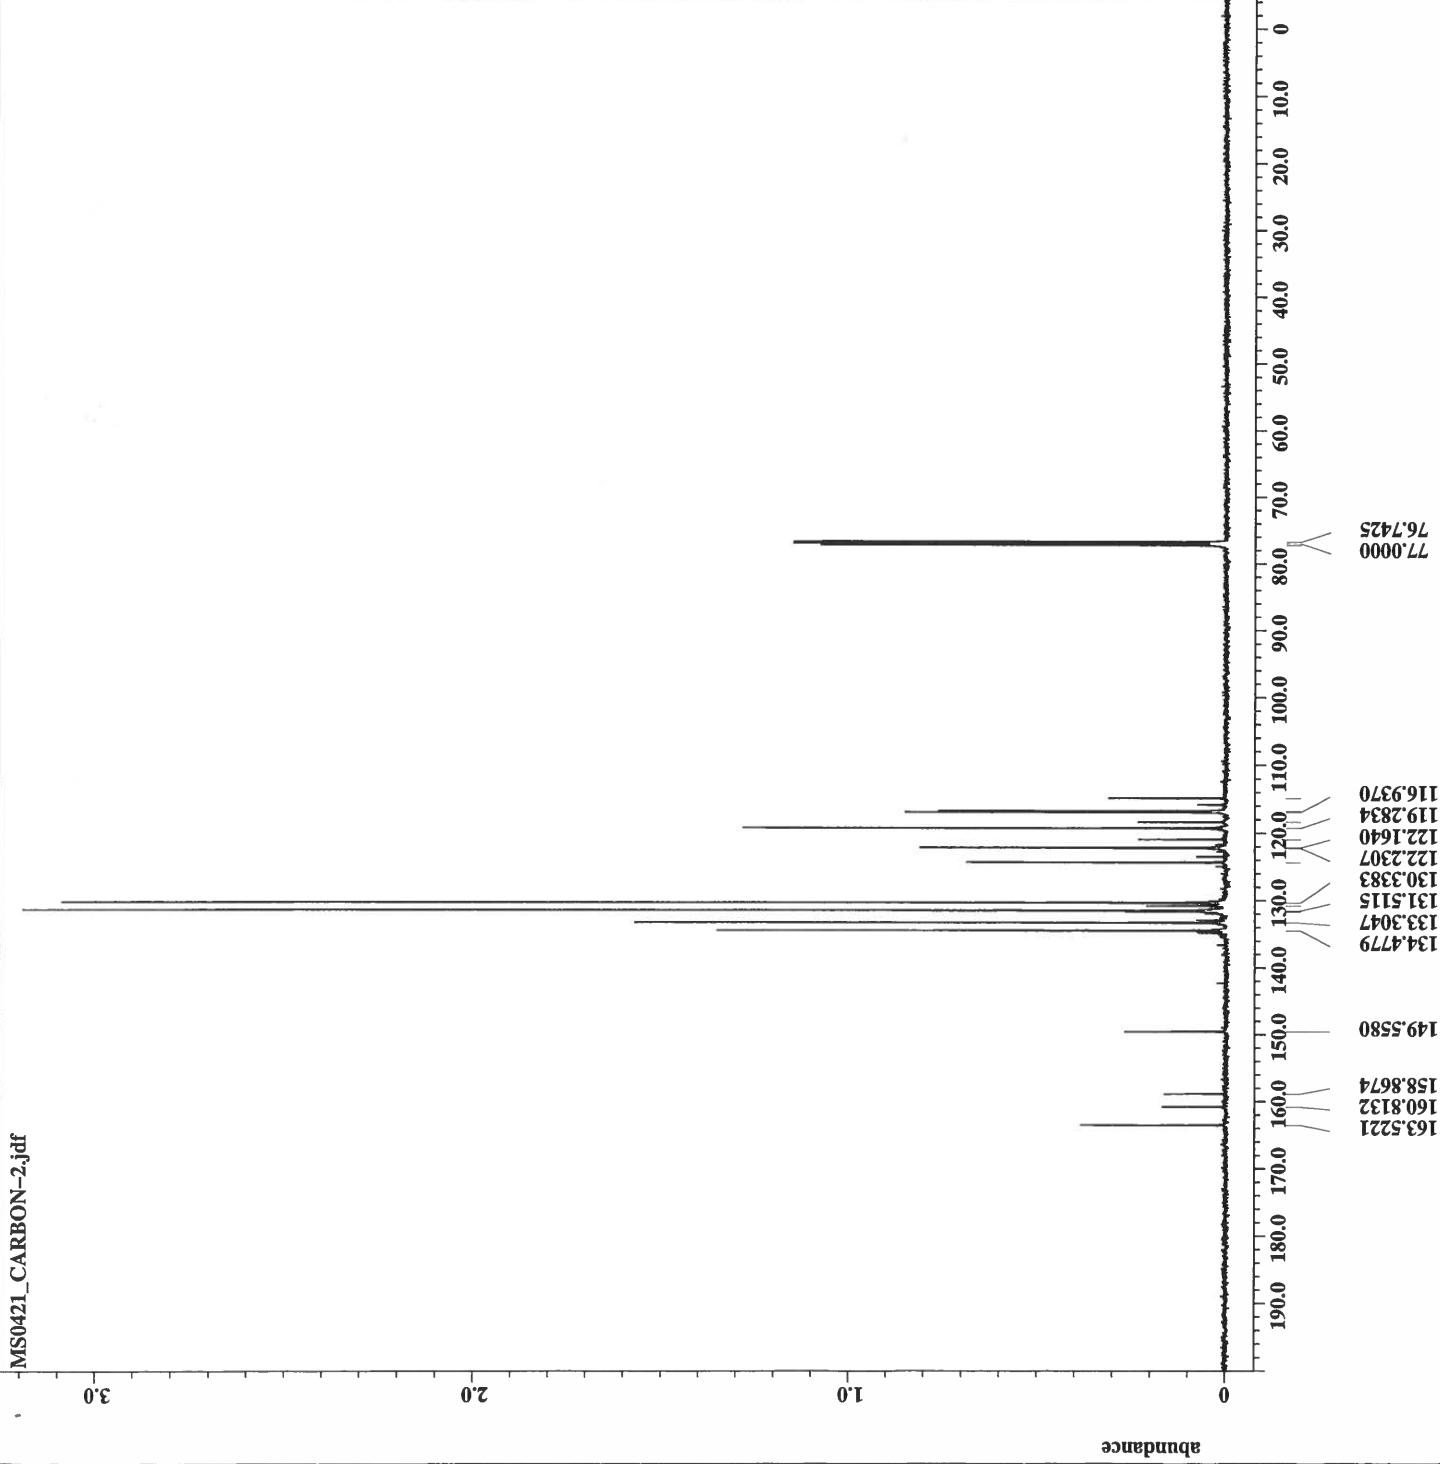

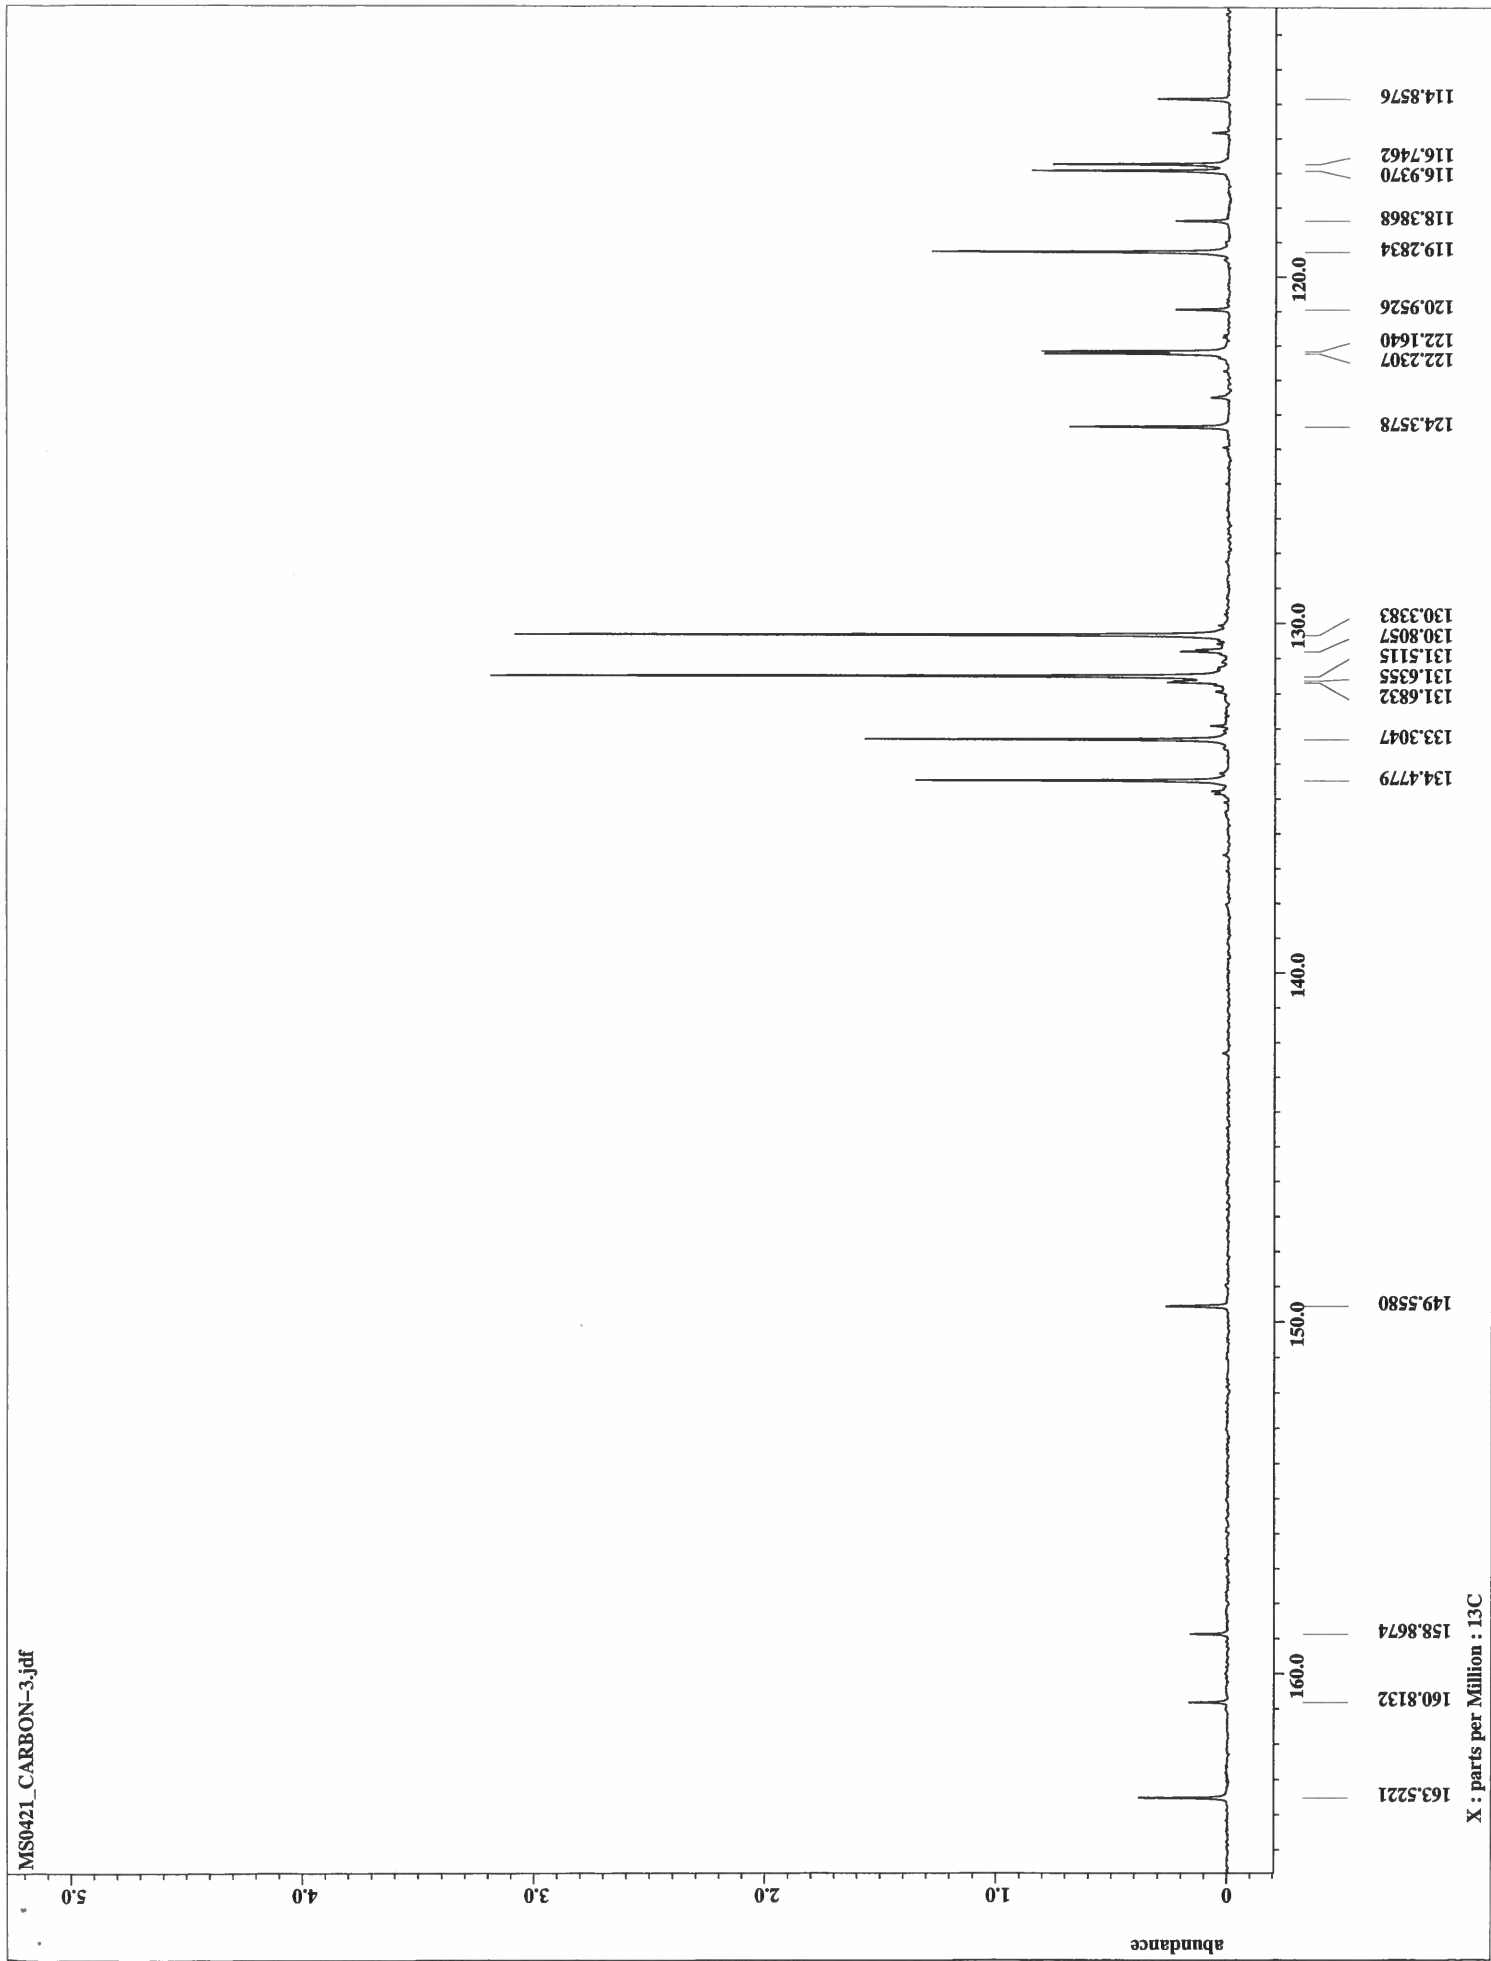

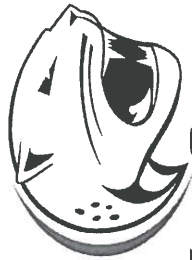SOUTH ALABAMA  
JAGUARS™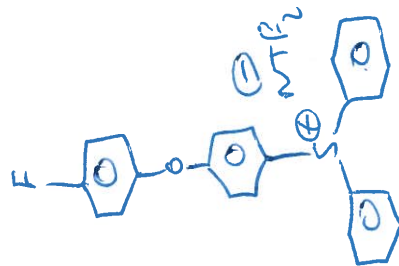

Filename = MS0421\_FLUORINE-2.jdf  
Author = Jim Davis  
Experiment = single\_pulse.ex2  
Sample\_id = MS0421  
Solvent = CHLOROFORM-D  
Charger\_sample = 1  
Creation\_time = 18-APR-2018 10:31:25  
Revision\_time = 18-APR-2018 10:09:13  
Current\_time = 18-APR-2018 10:09:13  
Data\_format = 1D COMPLEX  
Dim\_size = 52428  
Dim\_title = 19F  
Dim\_units = [ppm]  
Dimensions = X  
Site = ECA 500  
Spectrometer = JNM-ECA500  
Field\_strength = 11.7473579 [T] (500 [MH  
X\_acq\_duration = 0.55574528 [s]  
X\_domain = 19F  
X\_freq = 470.62046084 [MHz]  
X\_offset = -70 [ppm]  
X\_points = 65536  
X\_resolution = 1  
X\_prescans = 1  
X\_sweep = 117.9245283 [kHz]  
Irr\_domain = 19F  
Irr\_freq = 470.62046084 [MHz]  
Irr\_offset = 5 [ppm]  
Tri\_domain = 19F  
Tri\_freq = 470.62046084 [MHz]  
Tri\_offset = 5 [ppm]  
Clipped = FALSE  
Mod\_return = 1  
Scans = 16  
Total\_scans = 16  
X\_90\_width = 13.1 [us]  
X\_acq\_time = 0.55574528 [s]  
X\_angle = 45 [deg]  
X\_atn = 2.5 [dB]  
X\_pulse = 6.55 [us]  
Irr\_mode = Off  
Tri\_mode = Off  
Dante\_presat = FALSE  
Initial\_wait = 1 [s]  
Recvr\_gain = 32  
Relaxation\_delay = 4 [s]  
Repetition\_time = 4.55574528 [s]  
Temp\_get = 22.6 [dC]

abundance

30.0 20.0 10.0 0 -10.0 -20.0 -30.0 -40.0 -50.0 -60.0 -70.0 -80.0 -90.0 -100.0 -110.0 -120.0 -130.0 -140.0 -150.0 -160-170.0

-78.6142

-116.3821

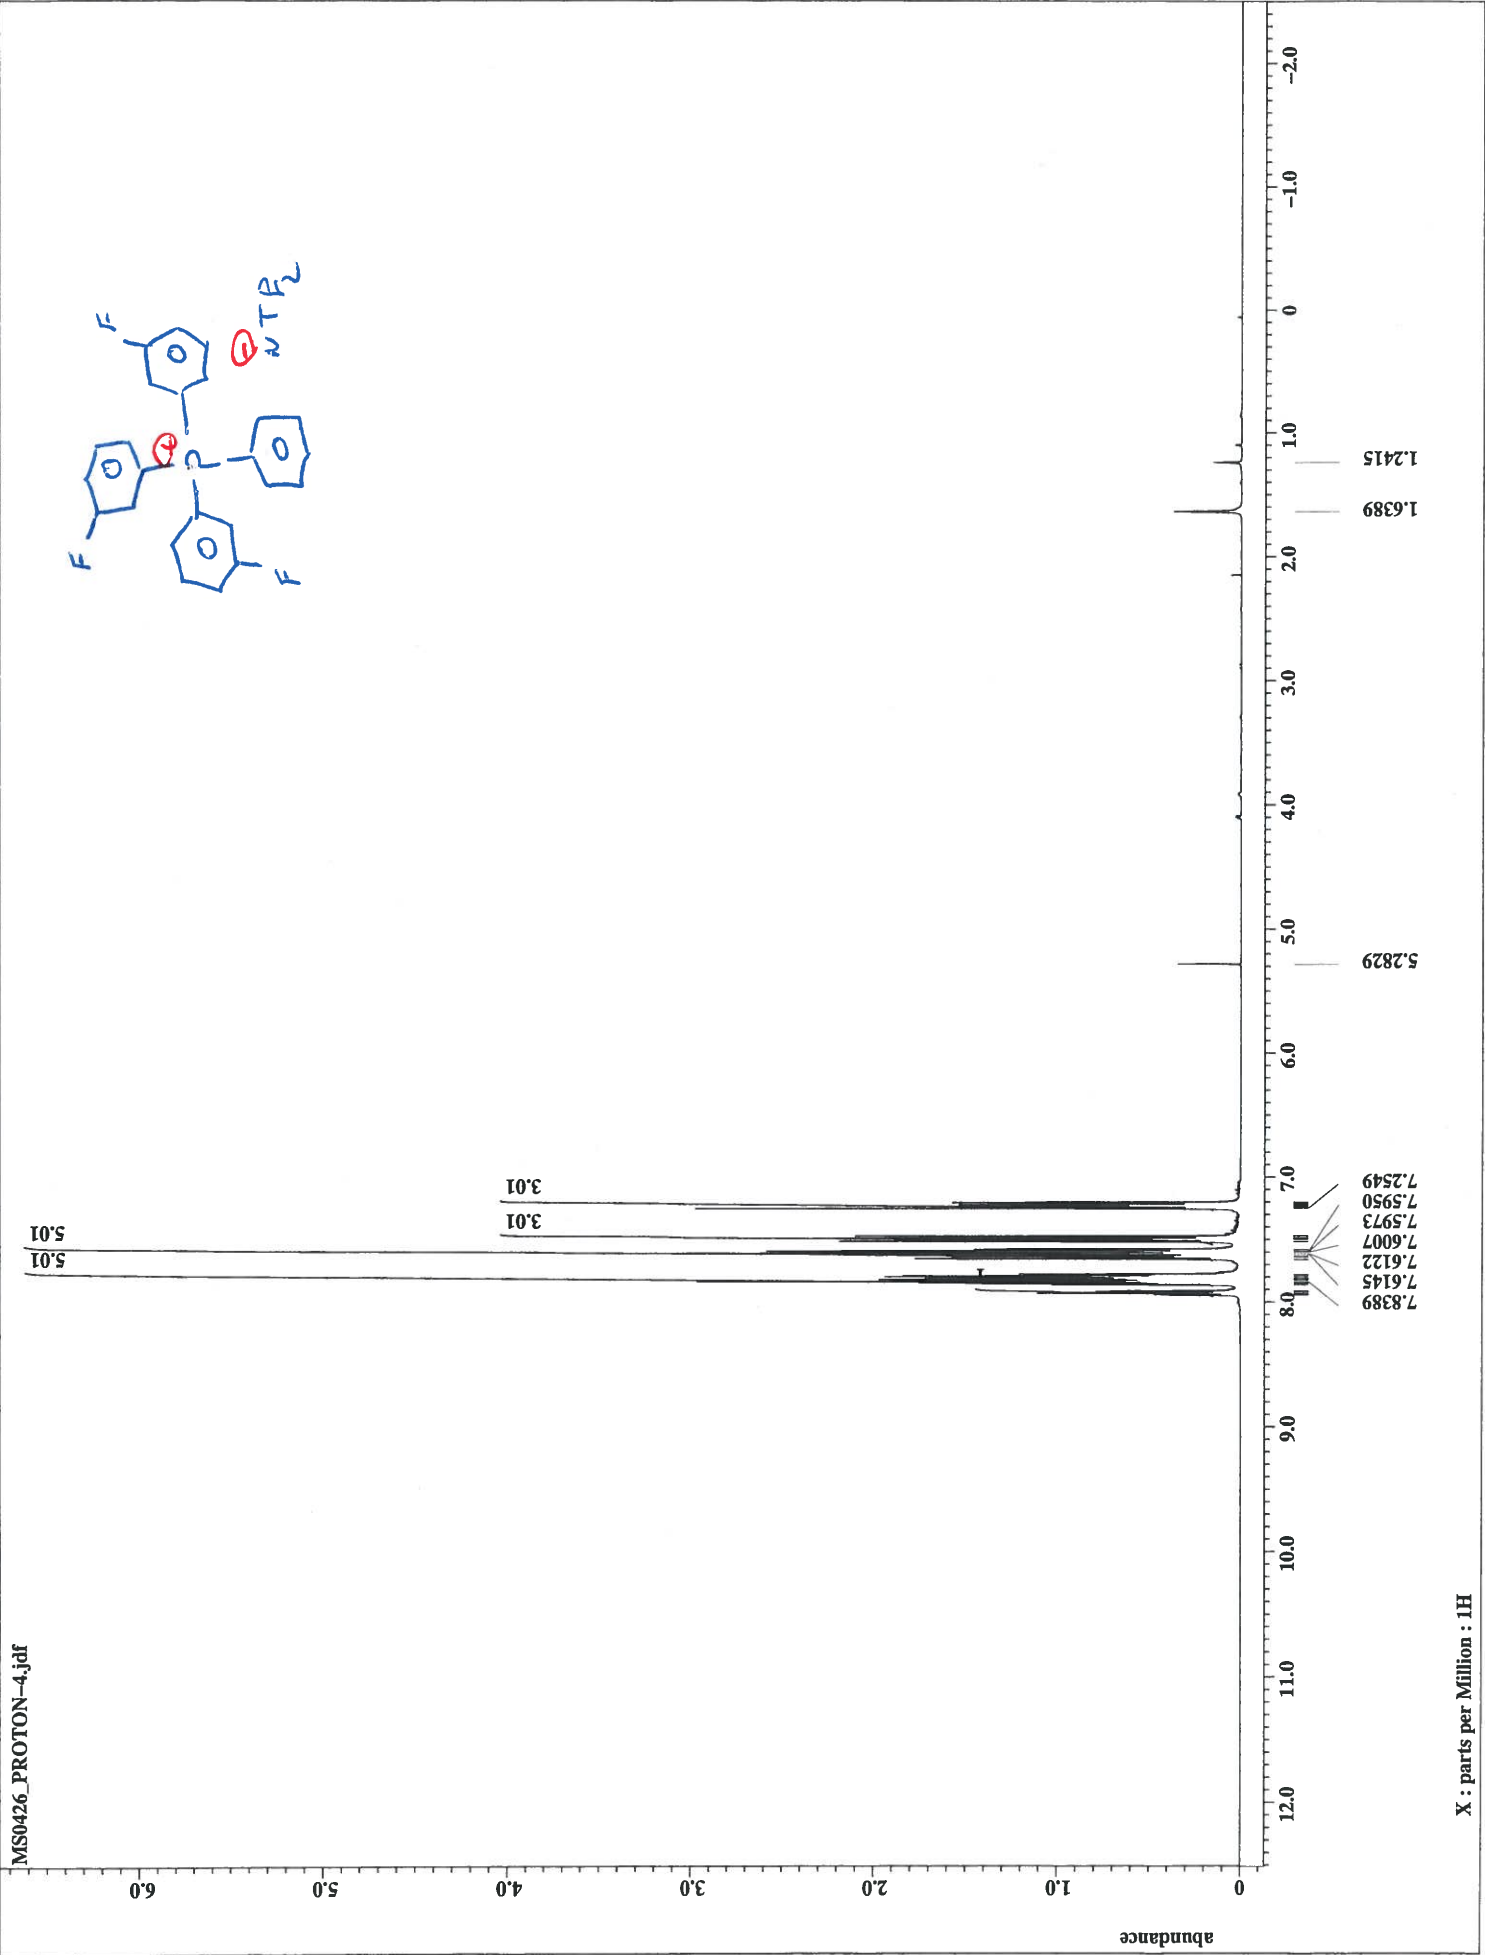

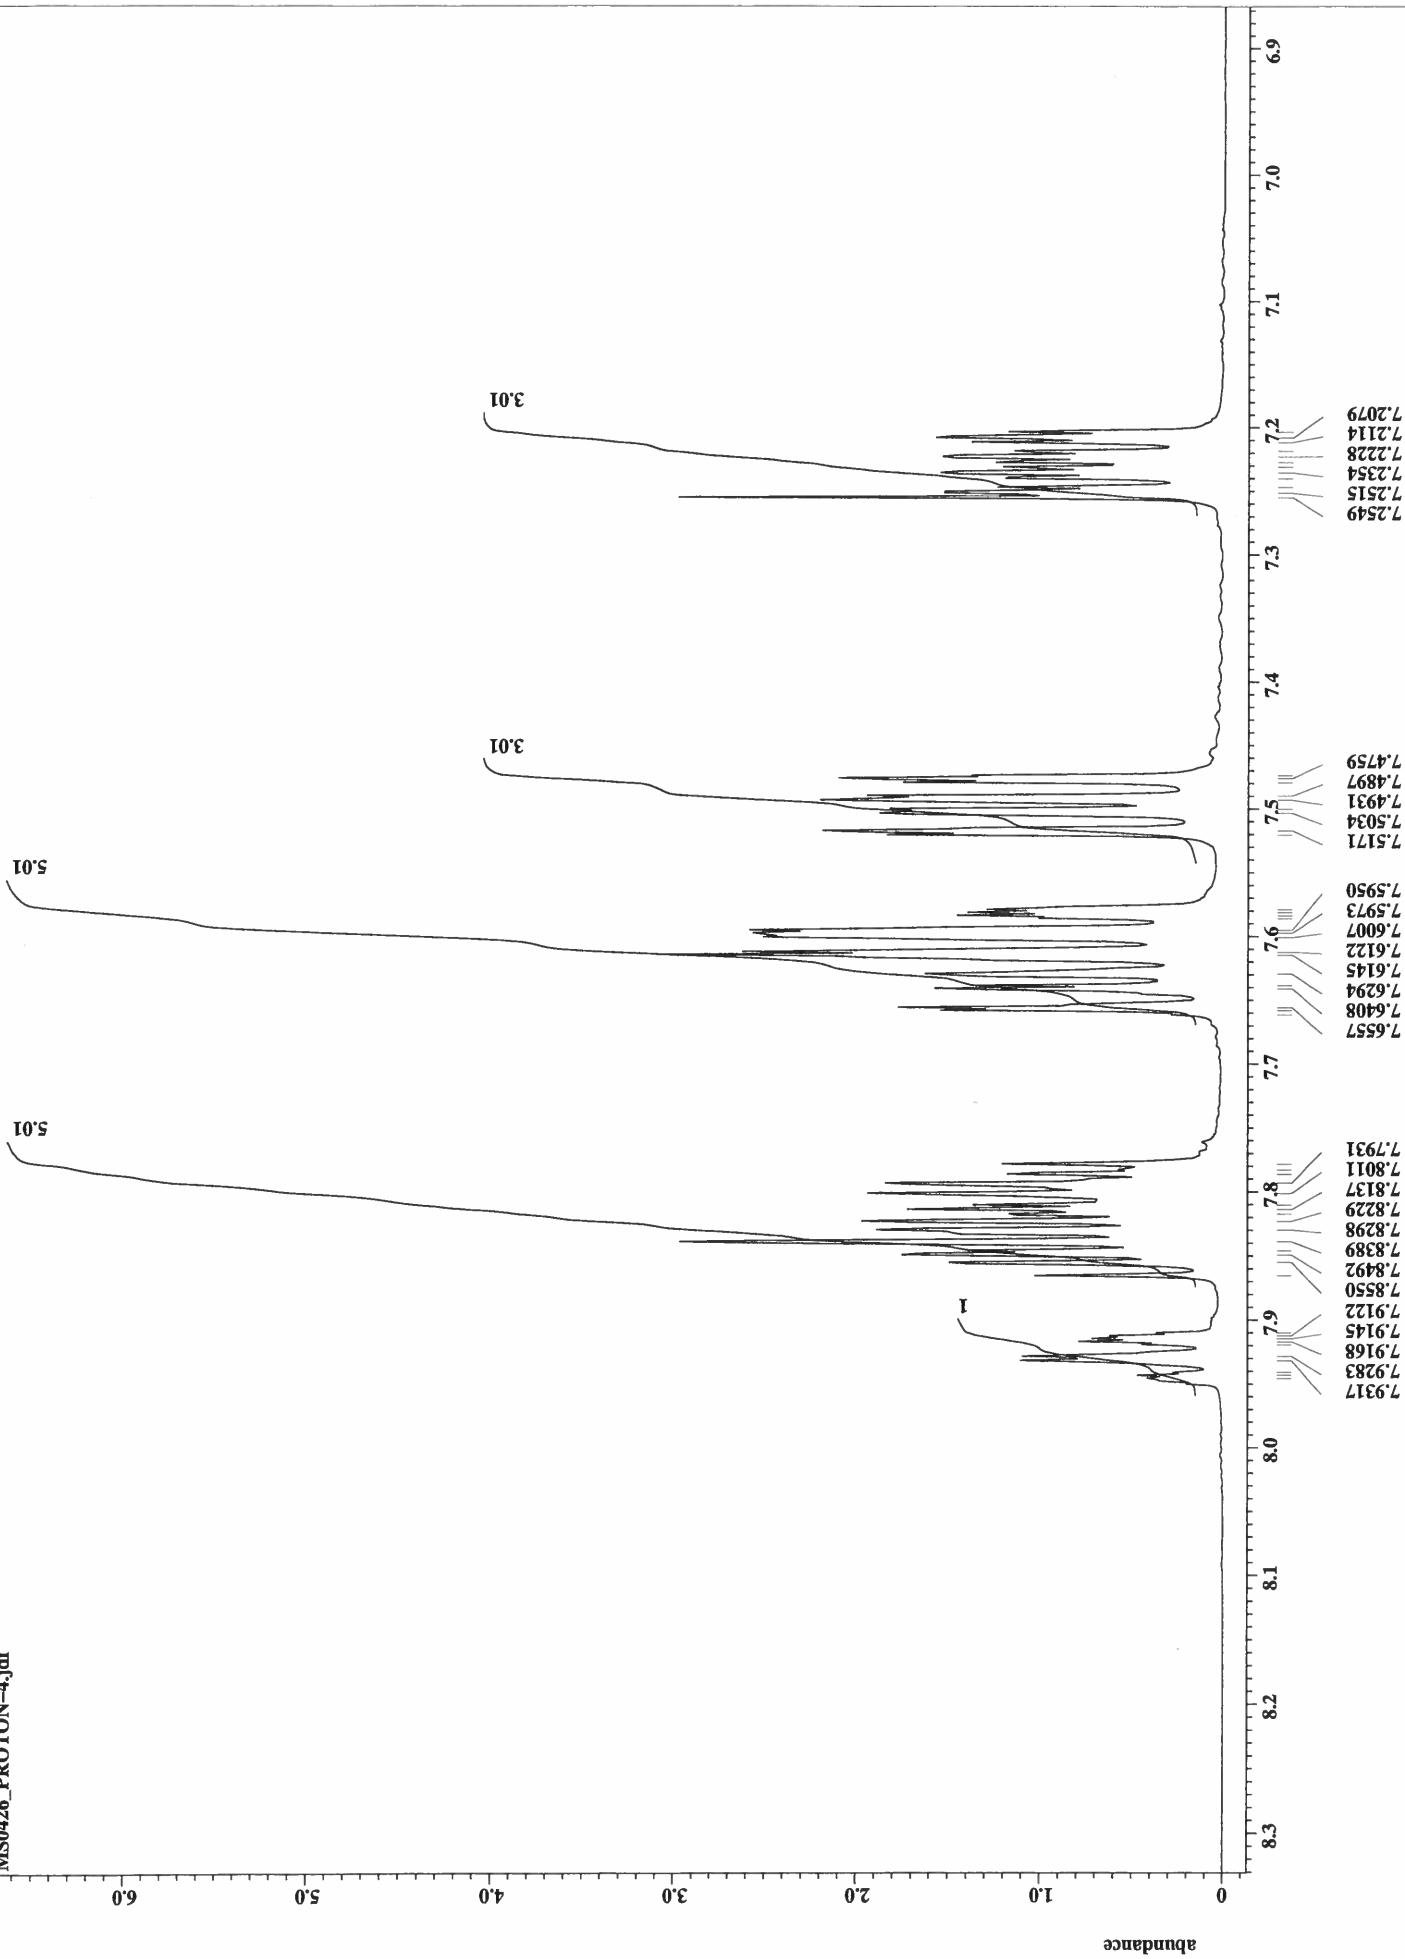

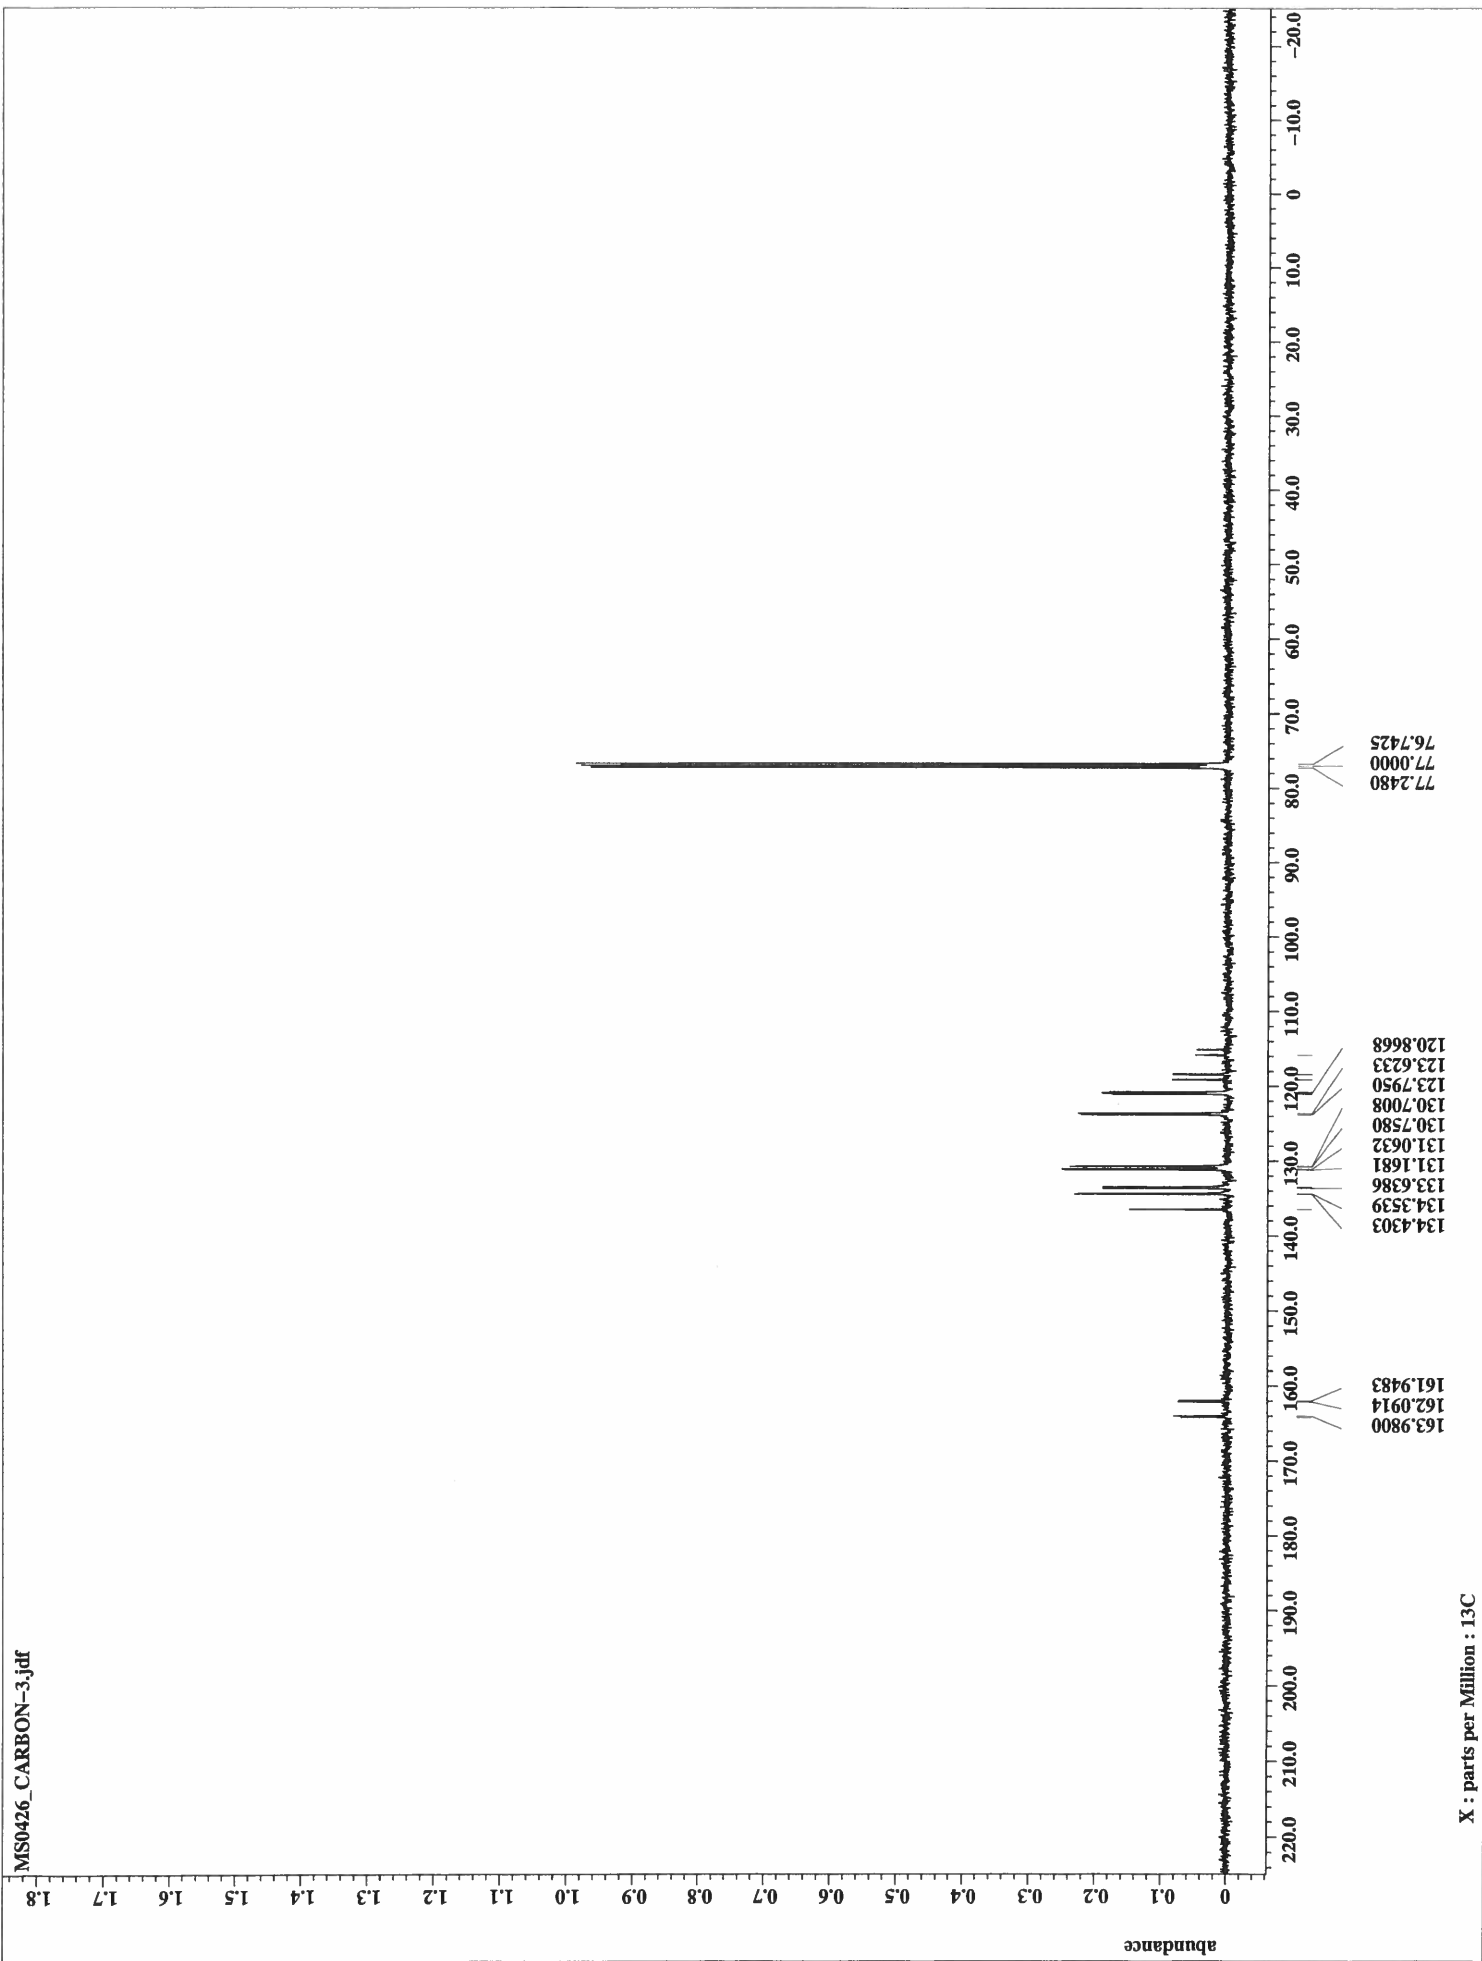

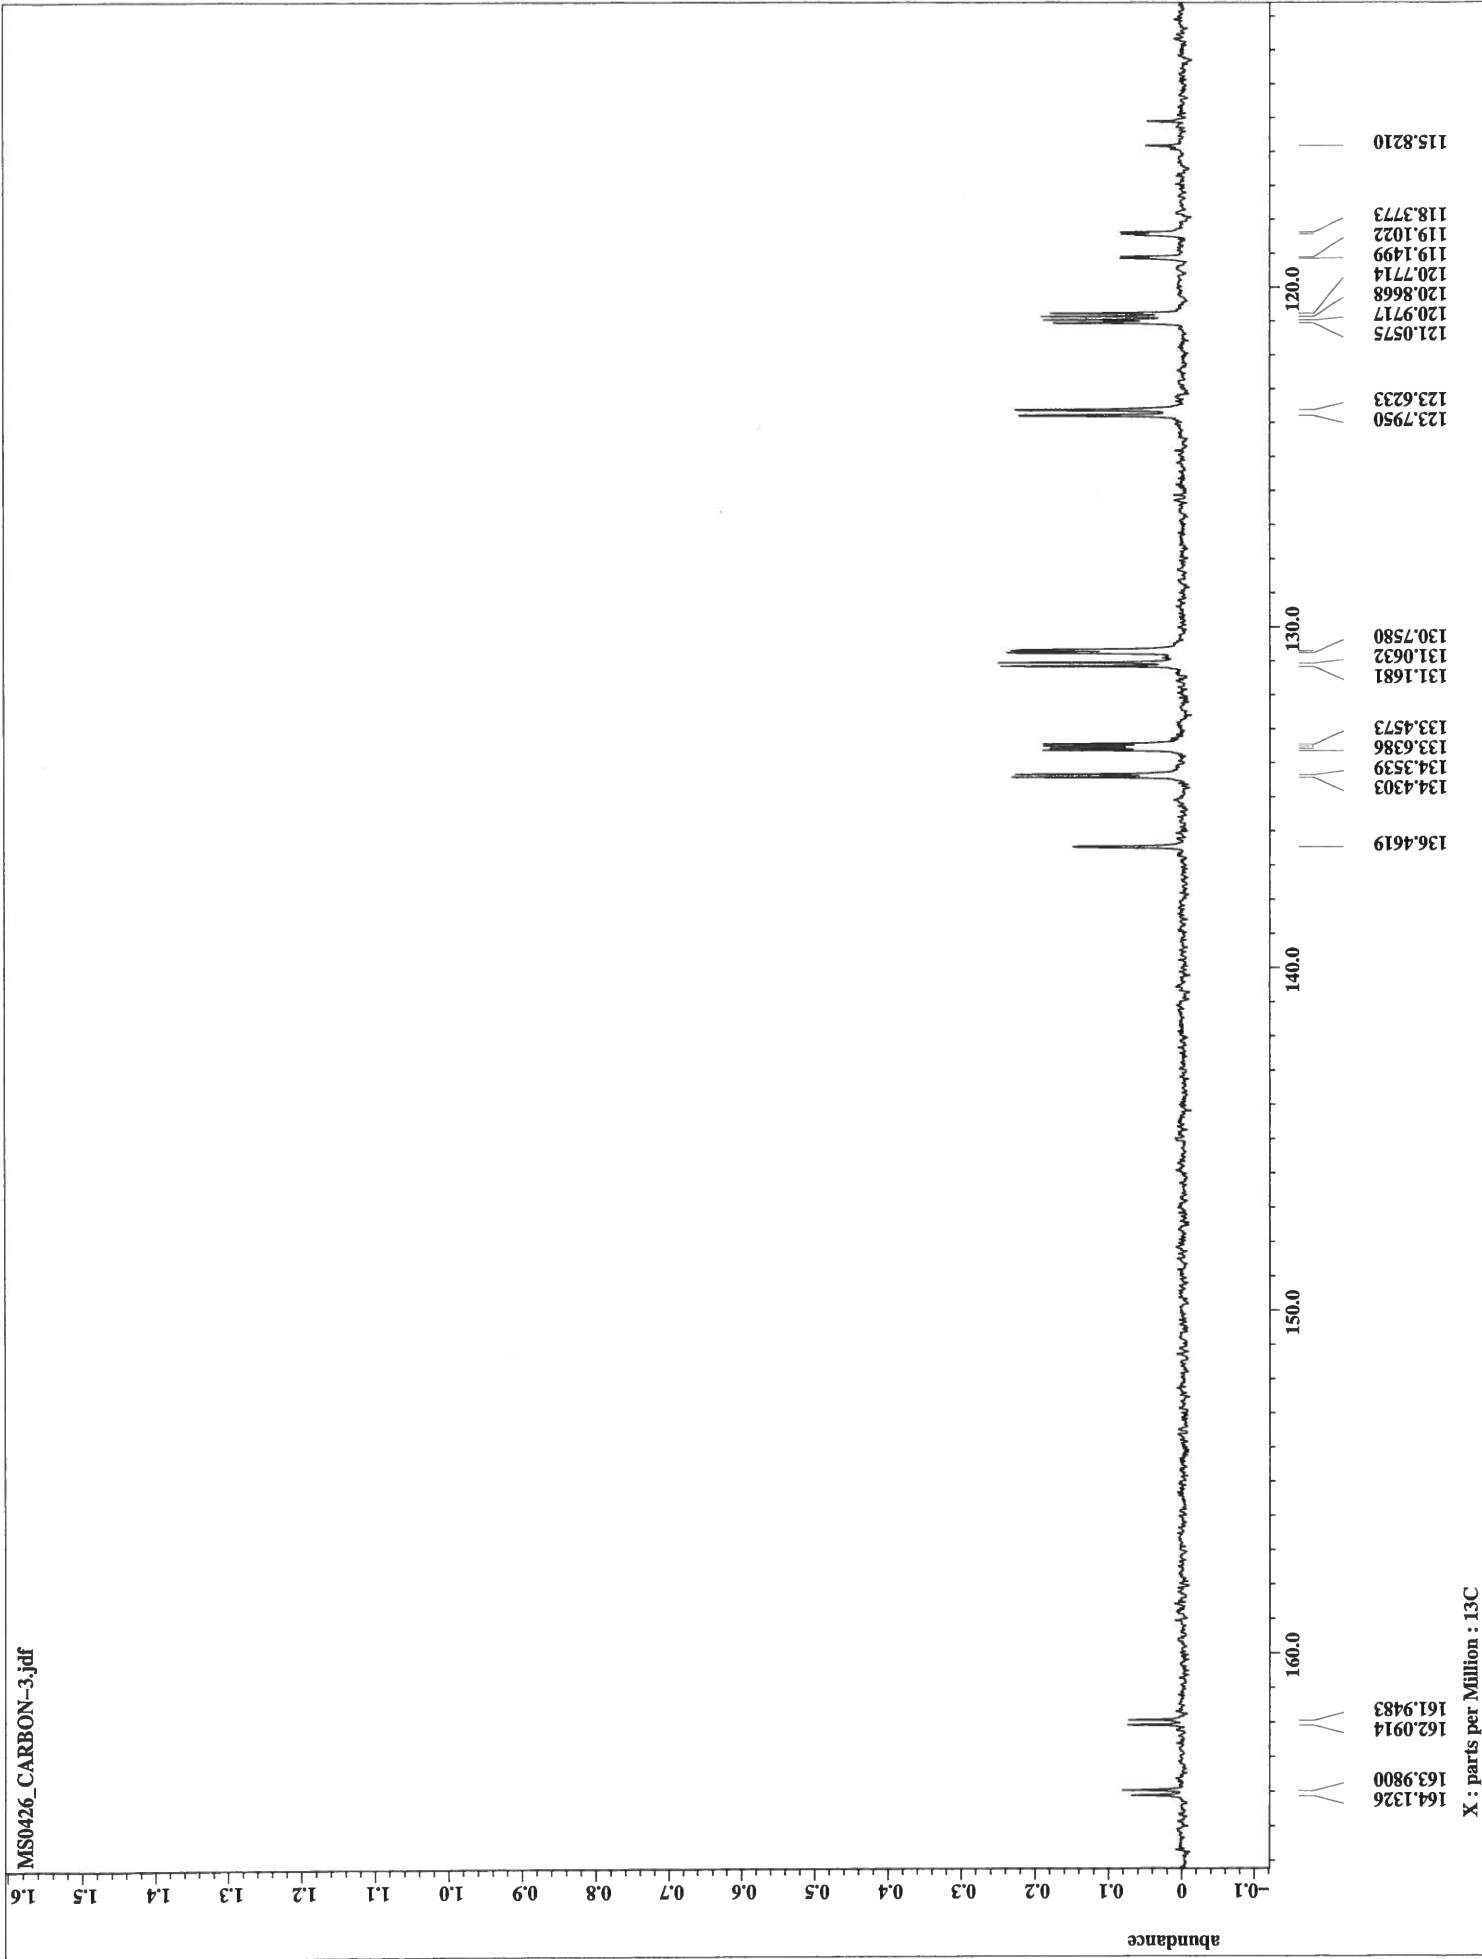



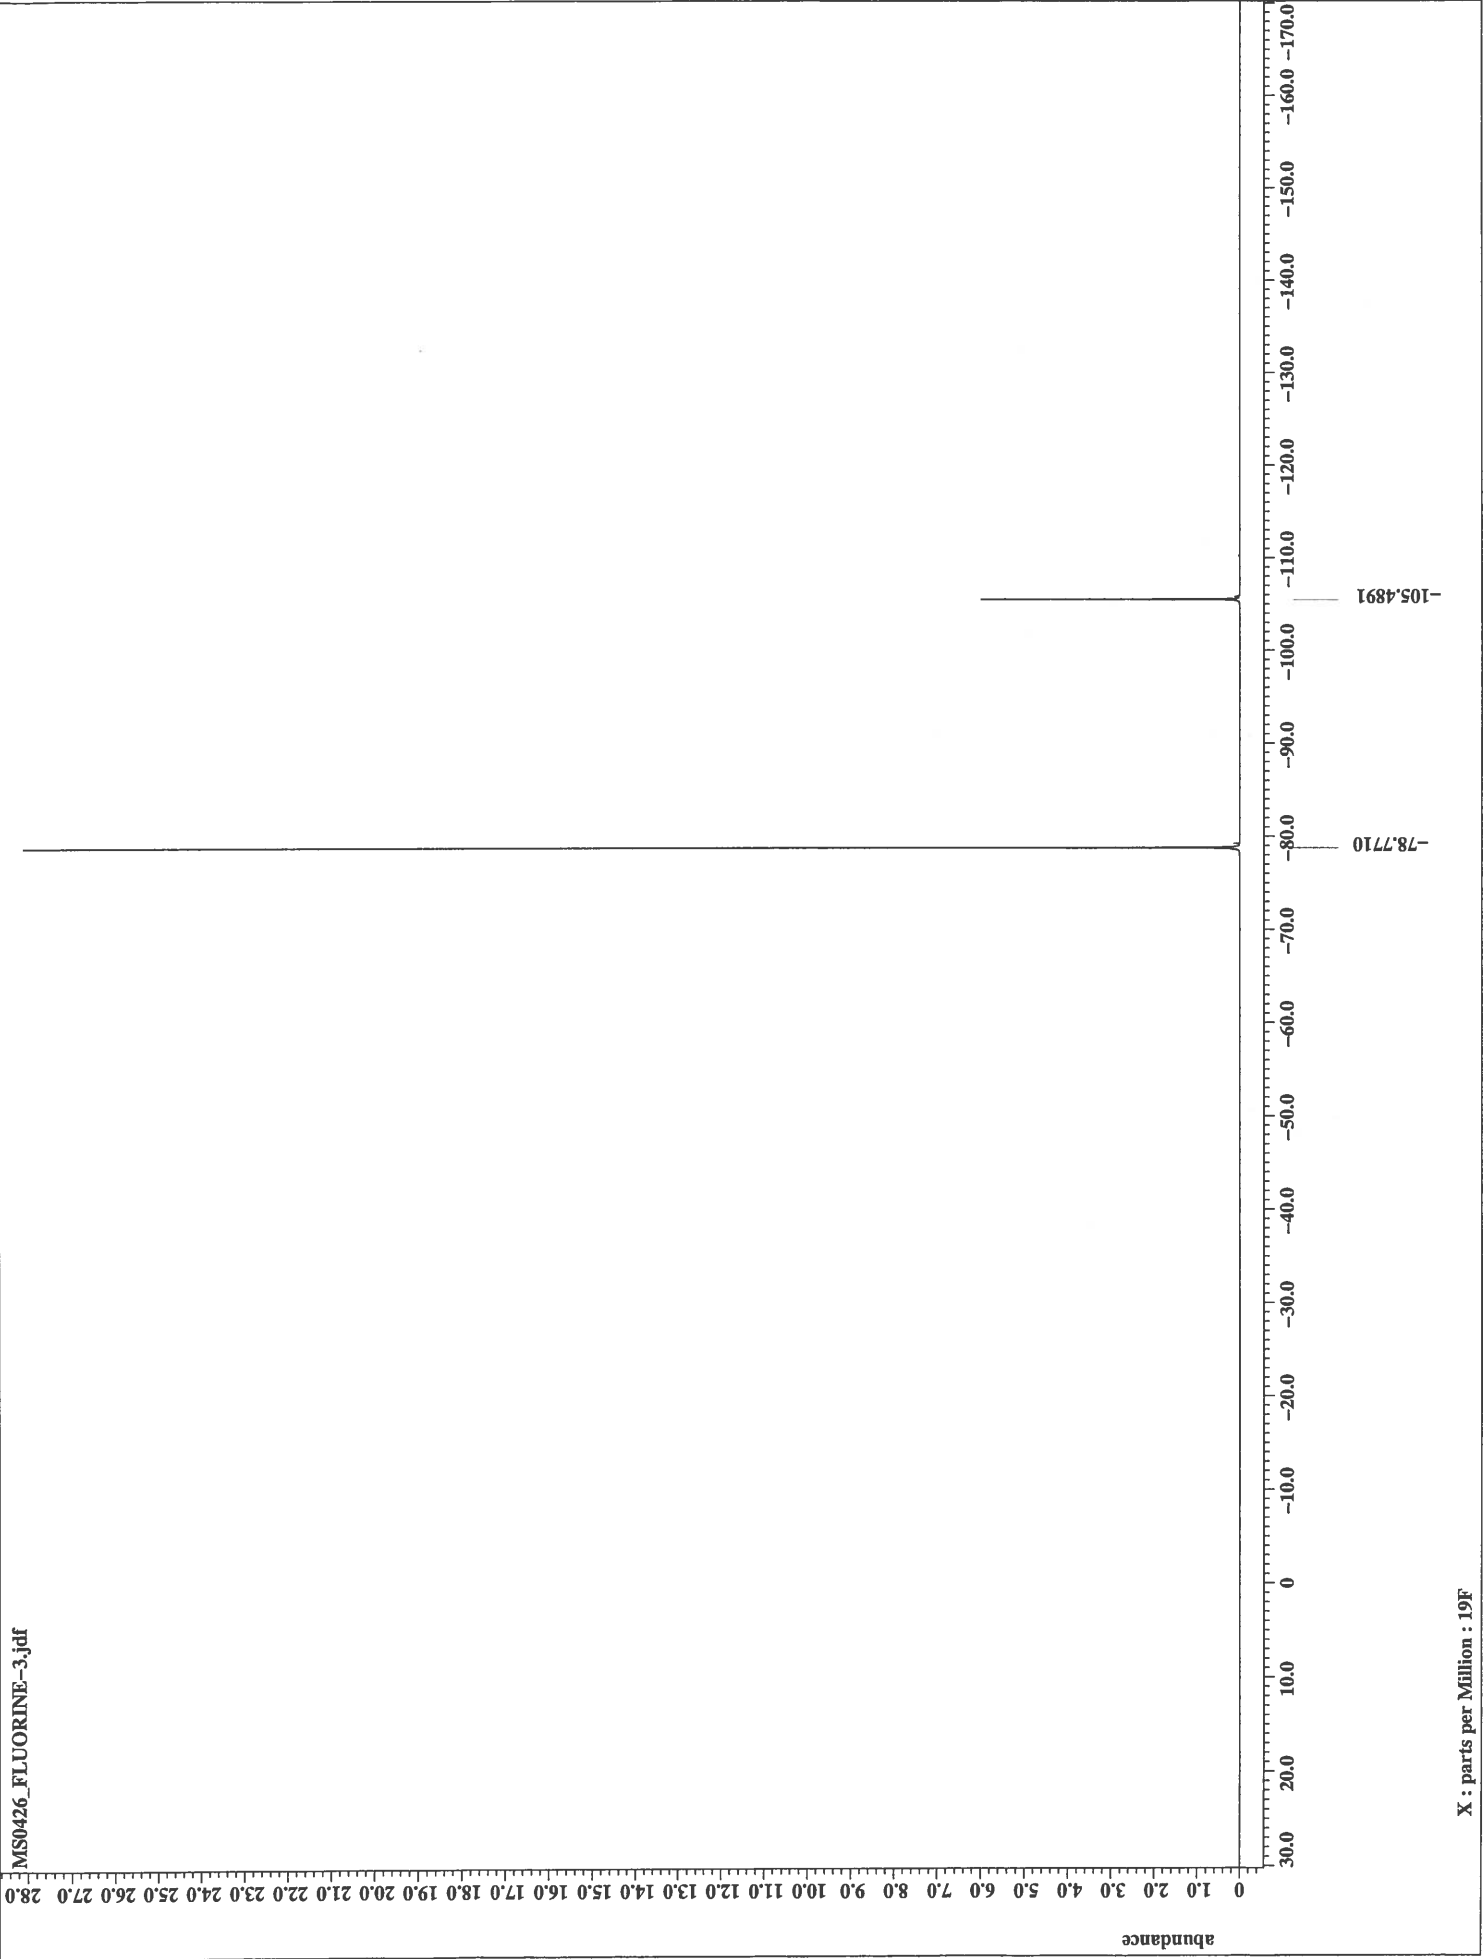

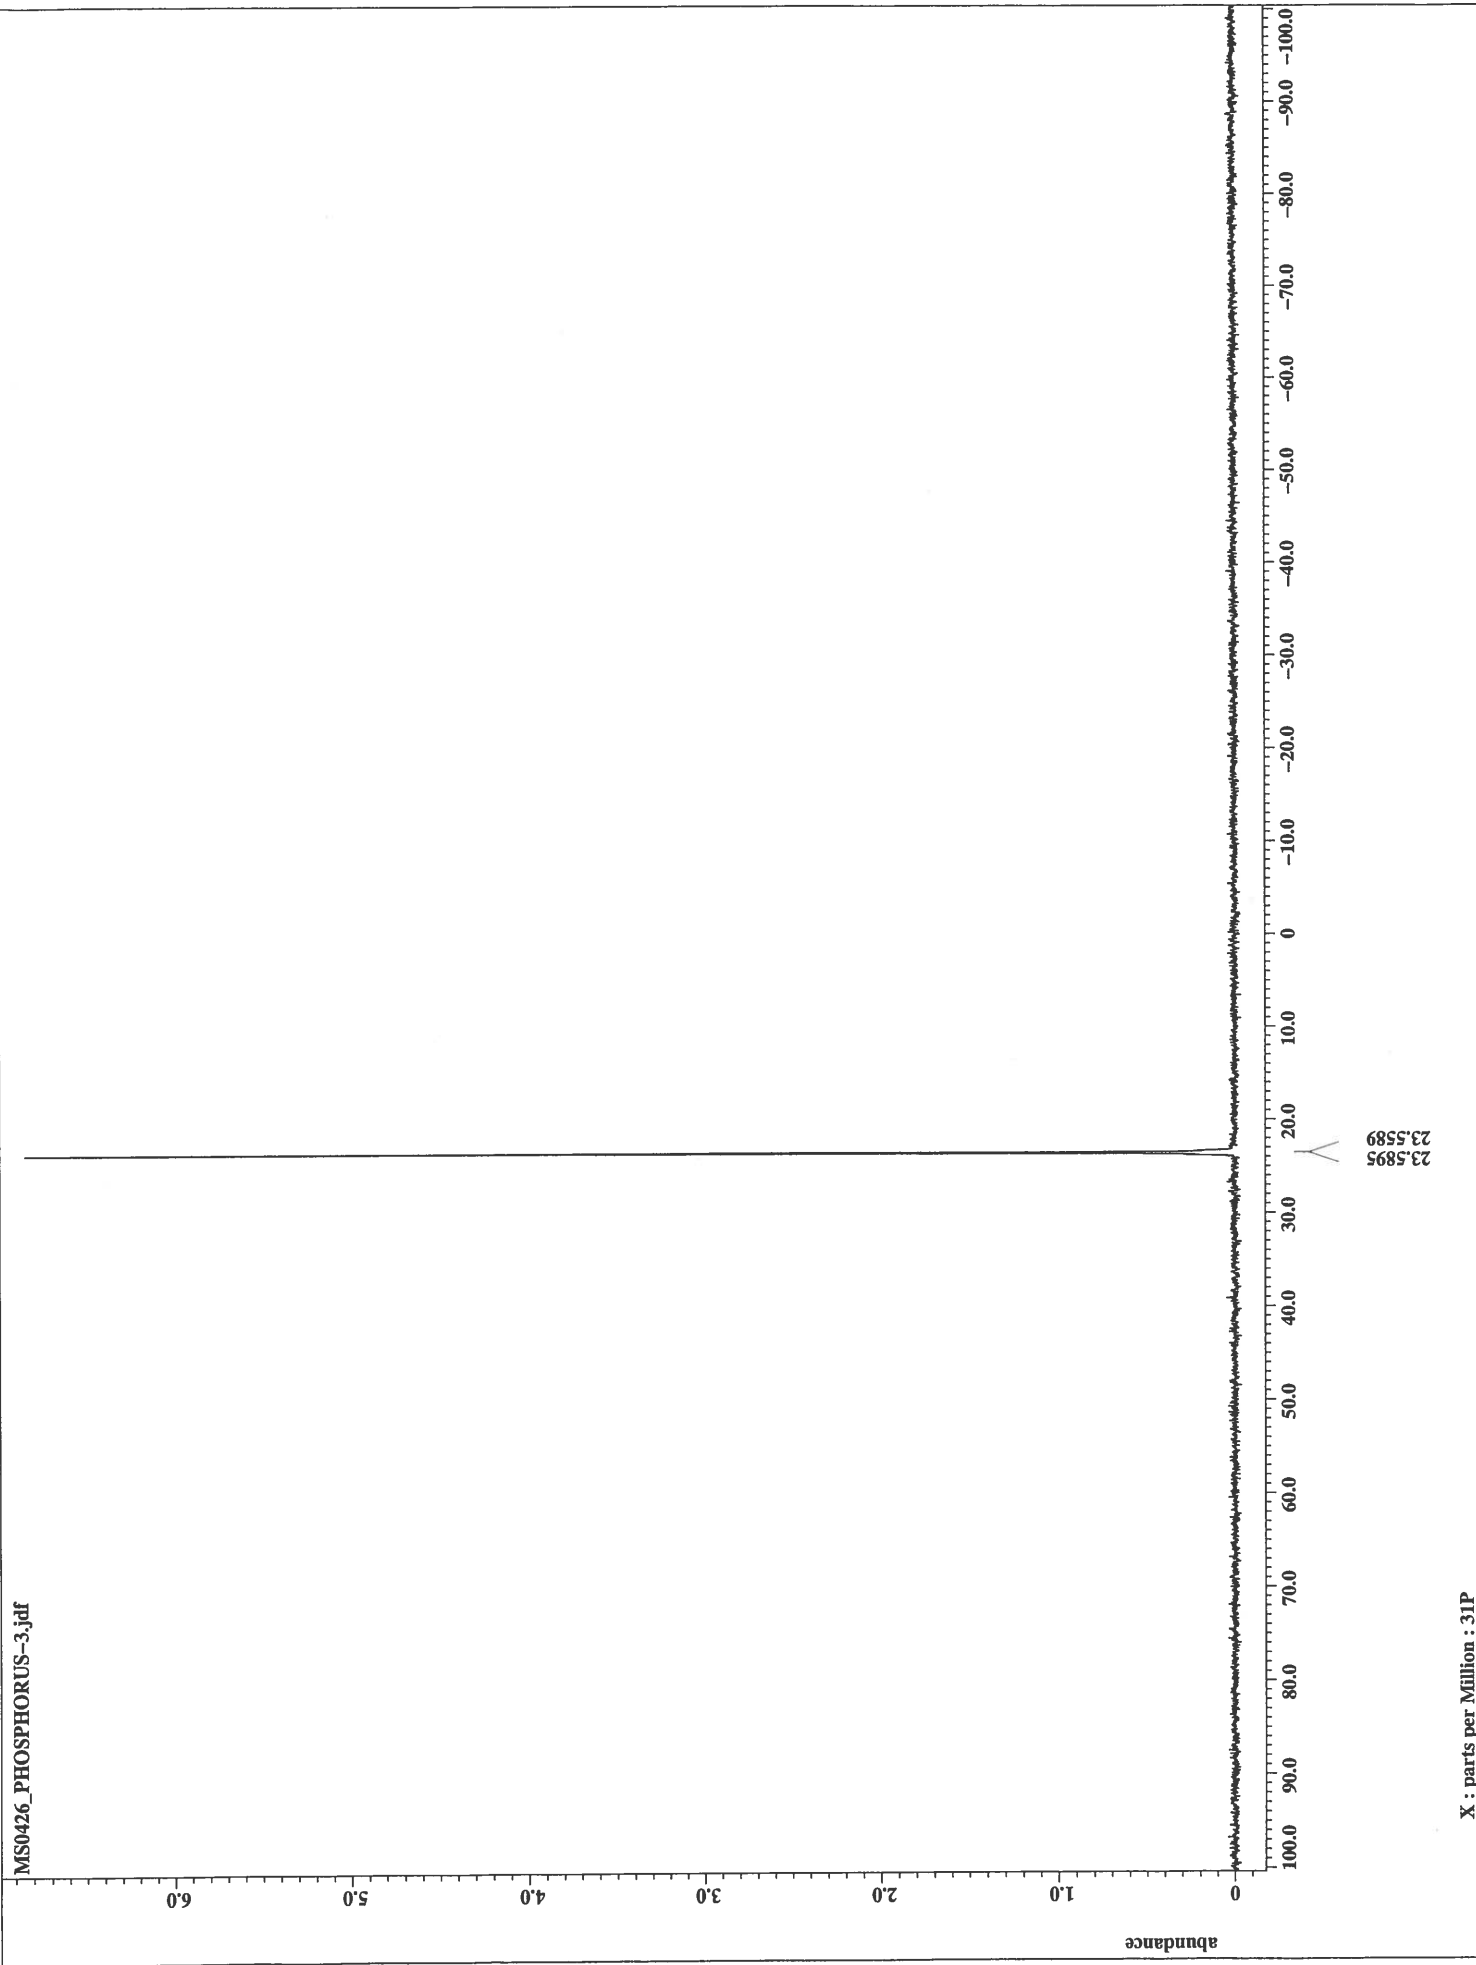

264.57

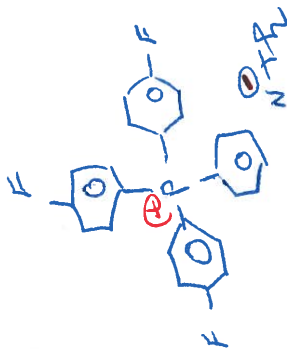

3.0

2.0

1.0

abundance

11.0 10.0 9.0 8.0 7.0 6.0 5.0 4.0 3.0 2.0 1.0 0

7.6339  
7.6317  
7.4198  
7.4072  
7.4026  
7.39004.1686  
4.1594  
3.9006  
3.8915

4.21

6.22

6.22

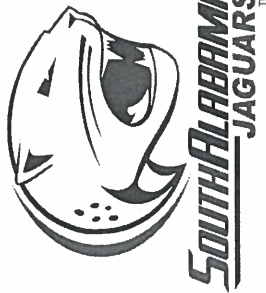

Filename = MS0430\_PROTON-2.jdf  
 Author = Jim Davis  
 Experiment = single\_pulse.ex2  
 Sample\_id = MS0430  
 Solvent = CHLOROFORM-D  
 Creation\_time = 26-NOV-2019 12:03:37  
 Revision\_time = 26-NOV-2019 11:34:33  
 Current\_time = 26-NOV-2019 11:34:33  
 Data\_format = 1D COMPLEX  
 Dim\_size = 13107  
 Dim\_title = 1H  
 Dim\_units = [ppm]  
 Dimensions = X  
 Site = ECA 500  
 Spectrometer = JNM-ECA500  
 Field\_strength = 11.7473579 [T] (500 [MH  
 X\_acq\_duration = 1.74587904 [s]  
 X\_domain = 1H  
 X\_freq = 500.15991521 [MHz]  
 X\_offset = 5.0 [ppm]  
 X\_points = 16384  
 X\_prescans = 1  
 X\_resolution = 0.57277737 [Hz]  
 X\_sweep = 9.38438438 [kHz]  
 Irr\_domain = 1H  
 Irr\_freq = 500.15991521 [MHz]  
 Irr\_offset = 5.0 [ppm]  
 Tri\_domain = 1H  
 Tri\_freq = 500.15991521 [MHz]  
 Tri\_offset = 5.0 [ppm]  
 Clipped = FALSE  
 Mod\_return = 1  
 Scans = 16  
 Total\_scans = 16  
 X\_90\_width = 11.3 [us]  
 X\_acq\_time = 1.74587904 [s]  
 X\_angle = 45 [deg]  
 X\_atn = 4 [dB]  
 X\_pulse = 5.65 [us]  
 Irr\_mode = Off  
 Tri\_mode = Off  
 Dante\_preset = FALSE  
 Initial\_wait = 1 [s]  
 Recvr\_gain = 26  
 Relaxation\_delay = 4 [s]  
 Repetition\_time = 5.74587904 [s]  
 Temp\_get = 19.1 [dC]

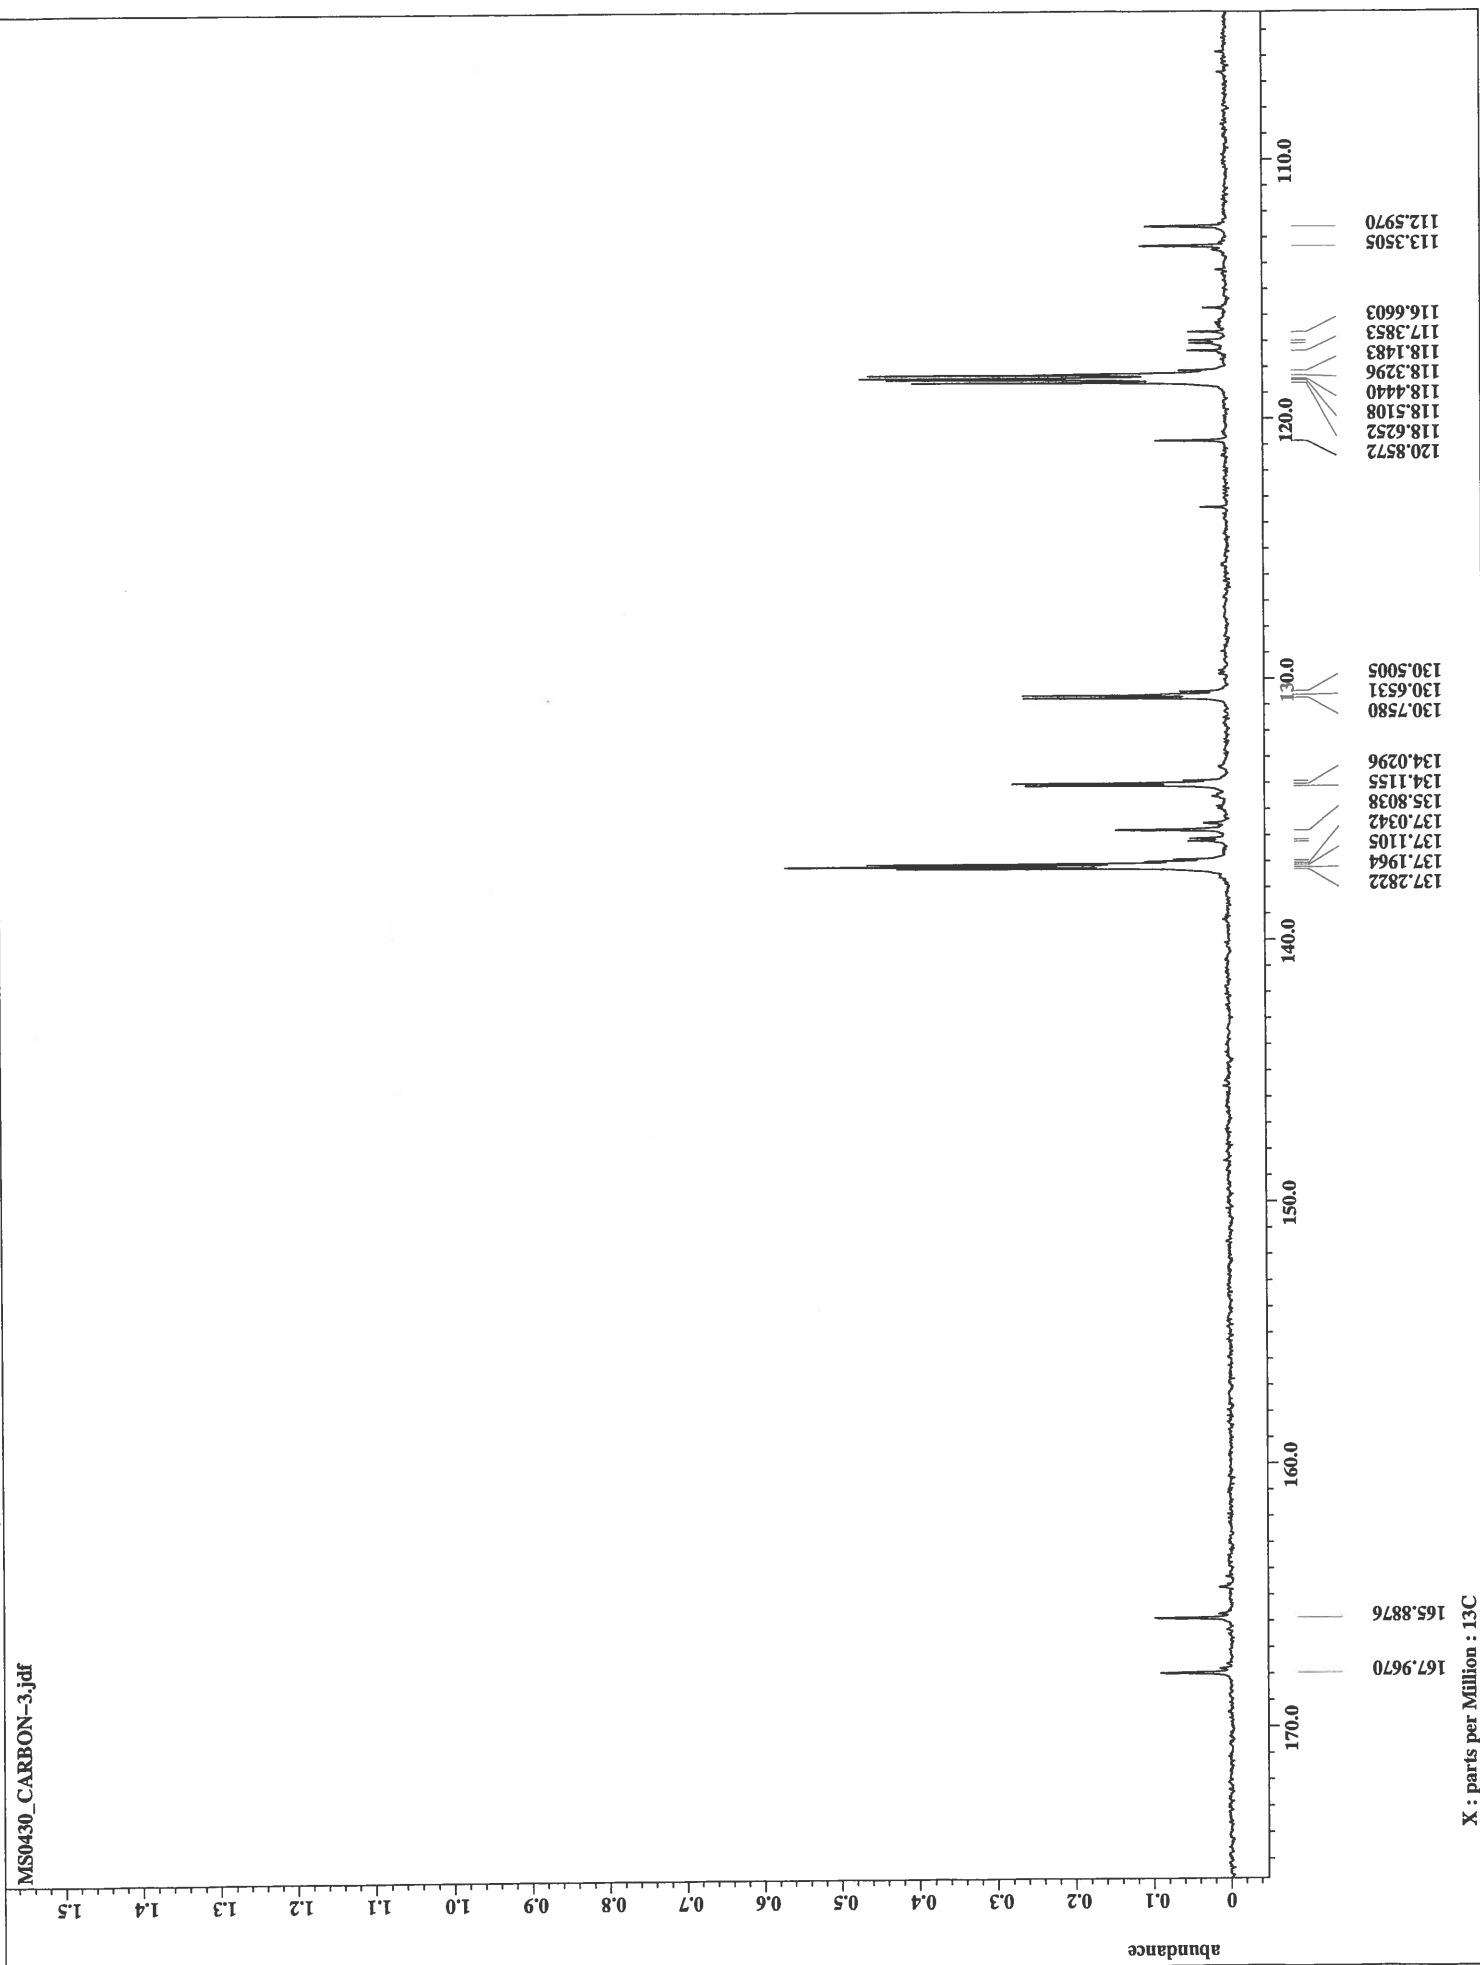

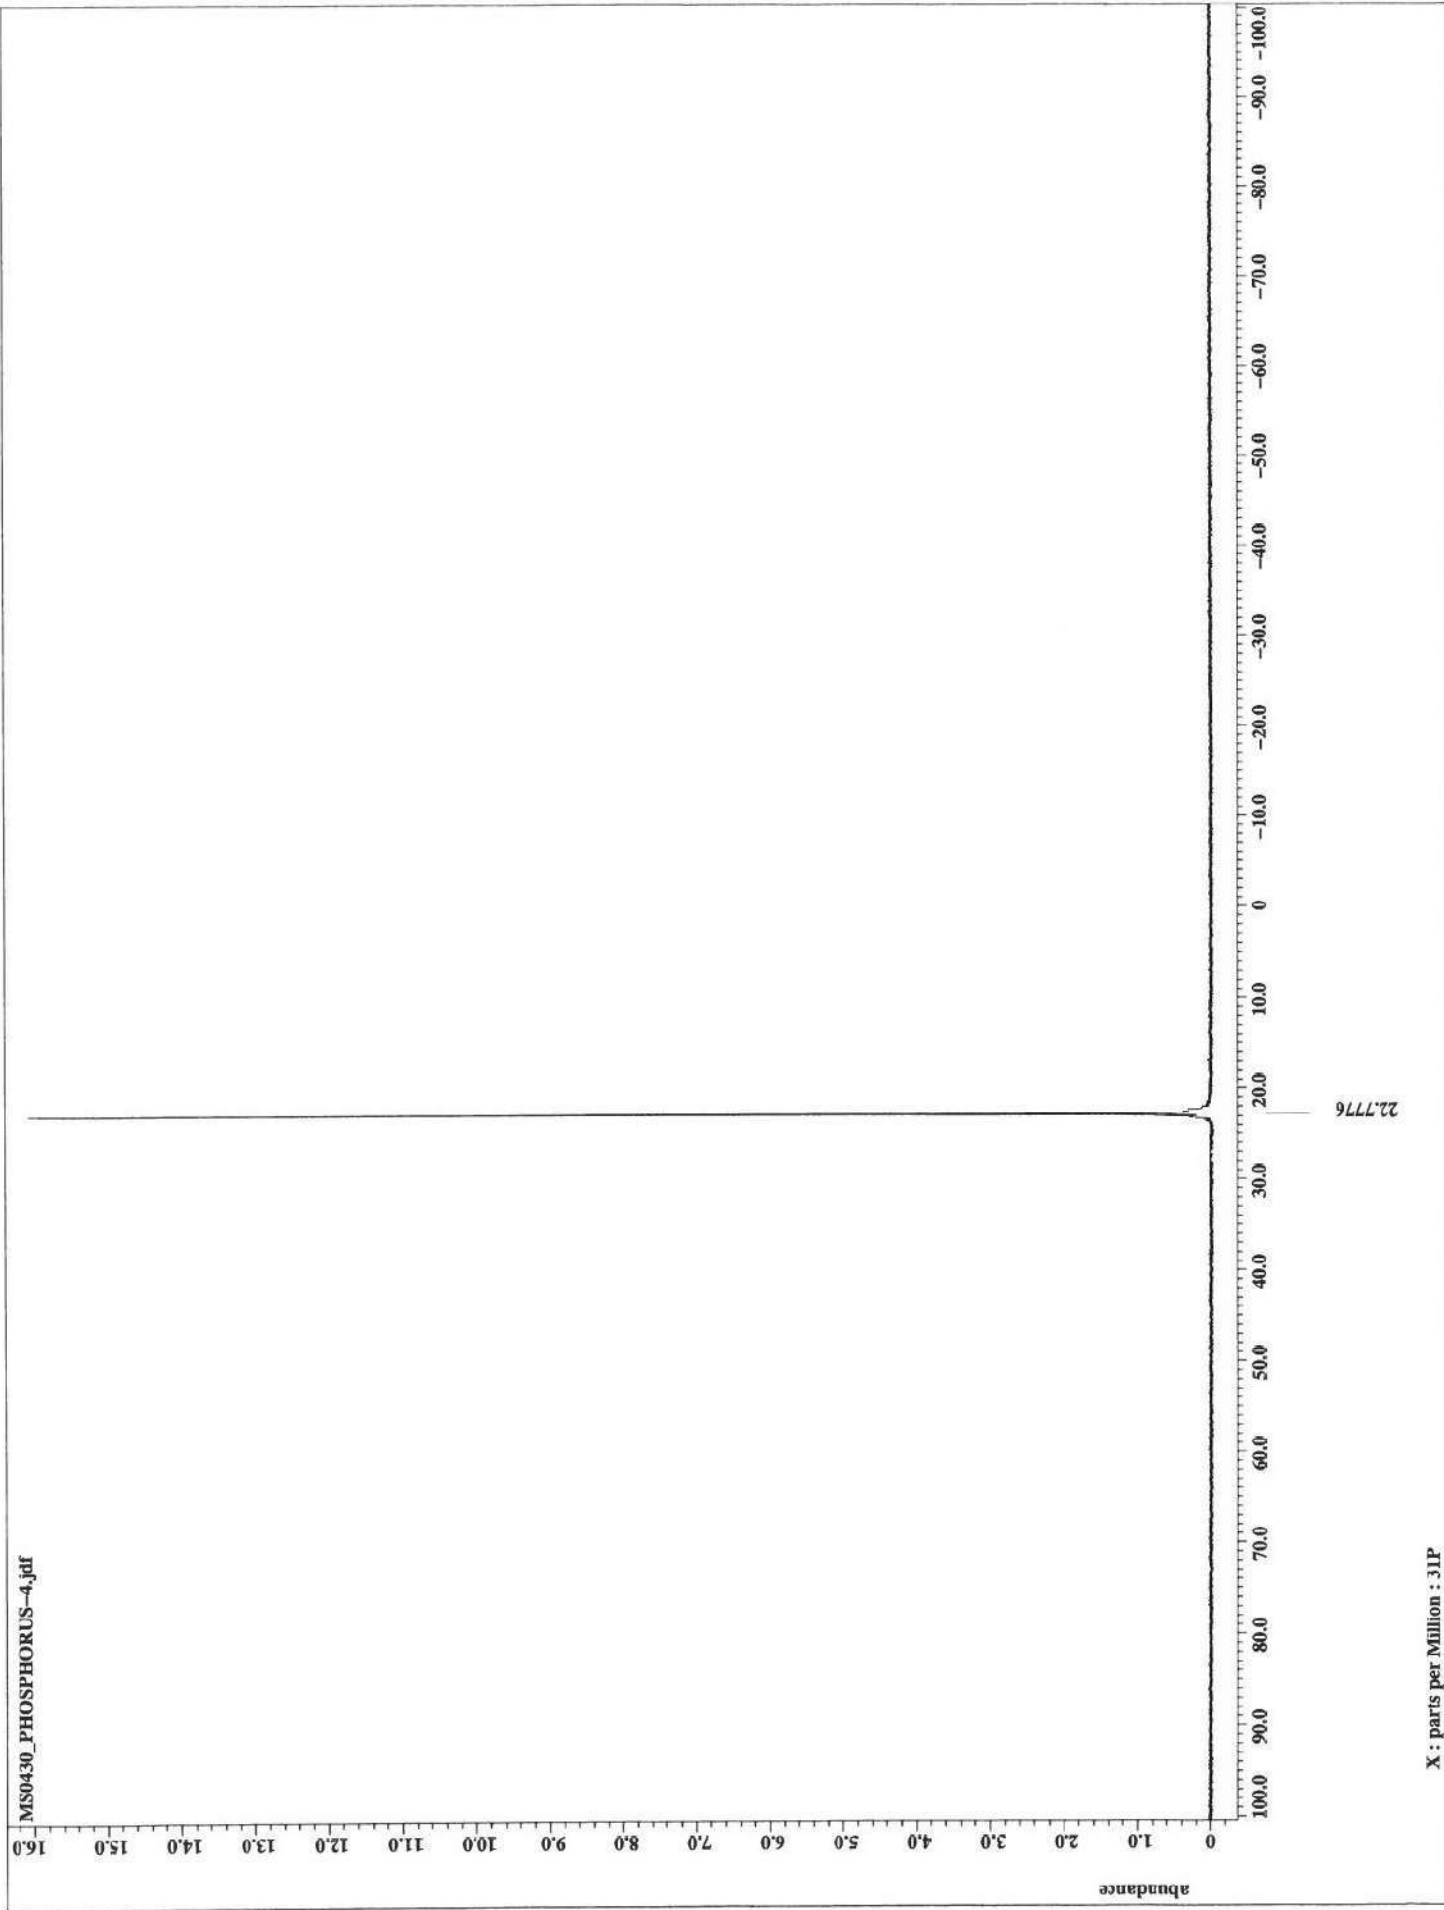

MS0430\_FLUORINE-3.jdf

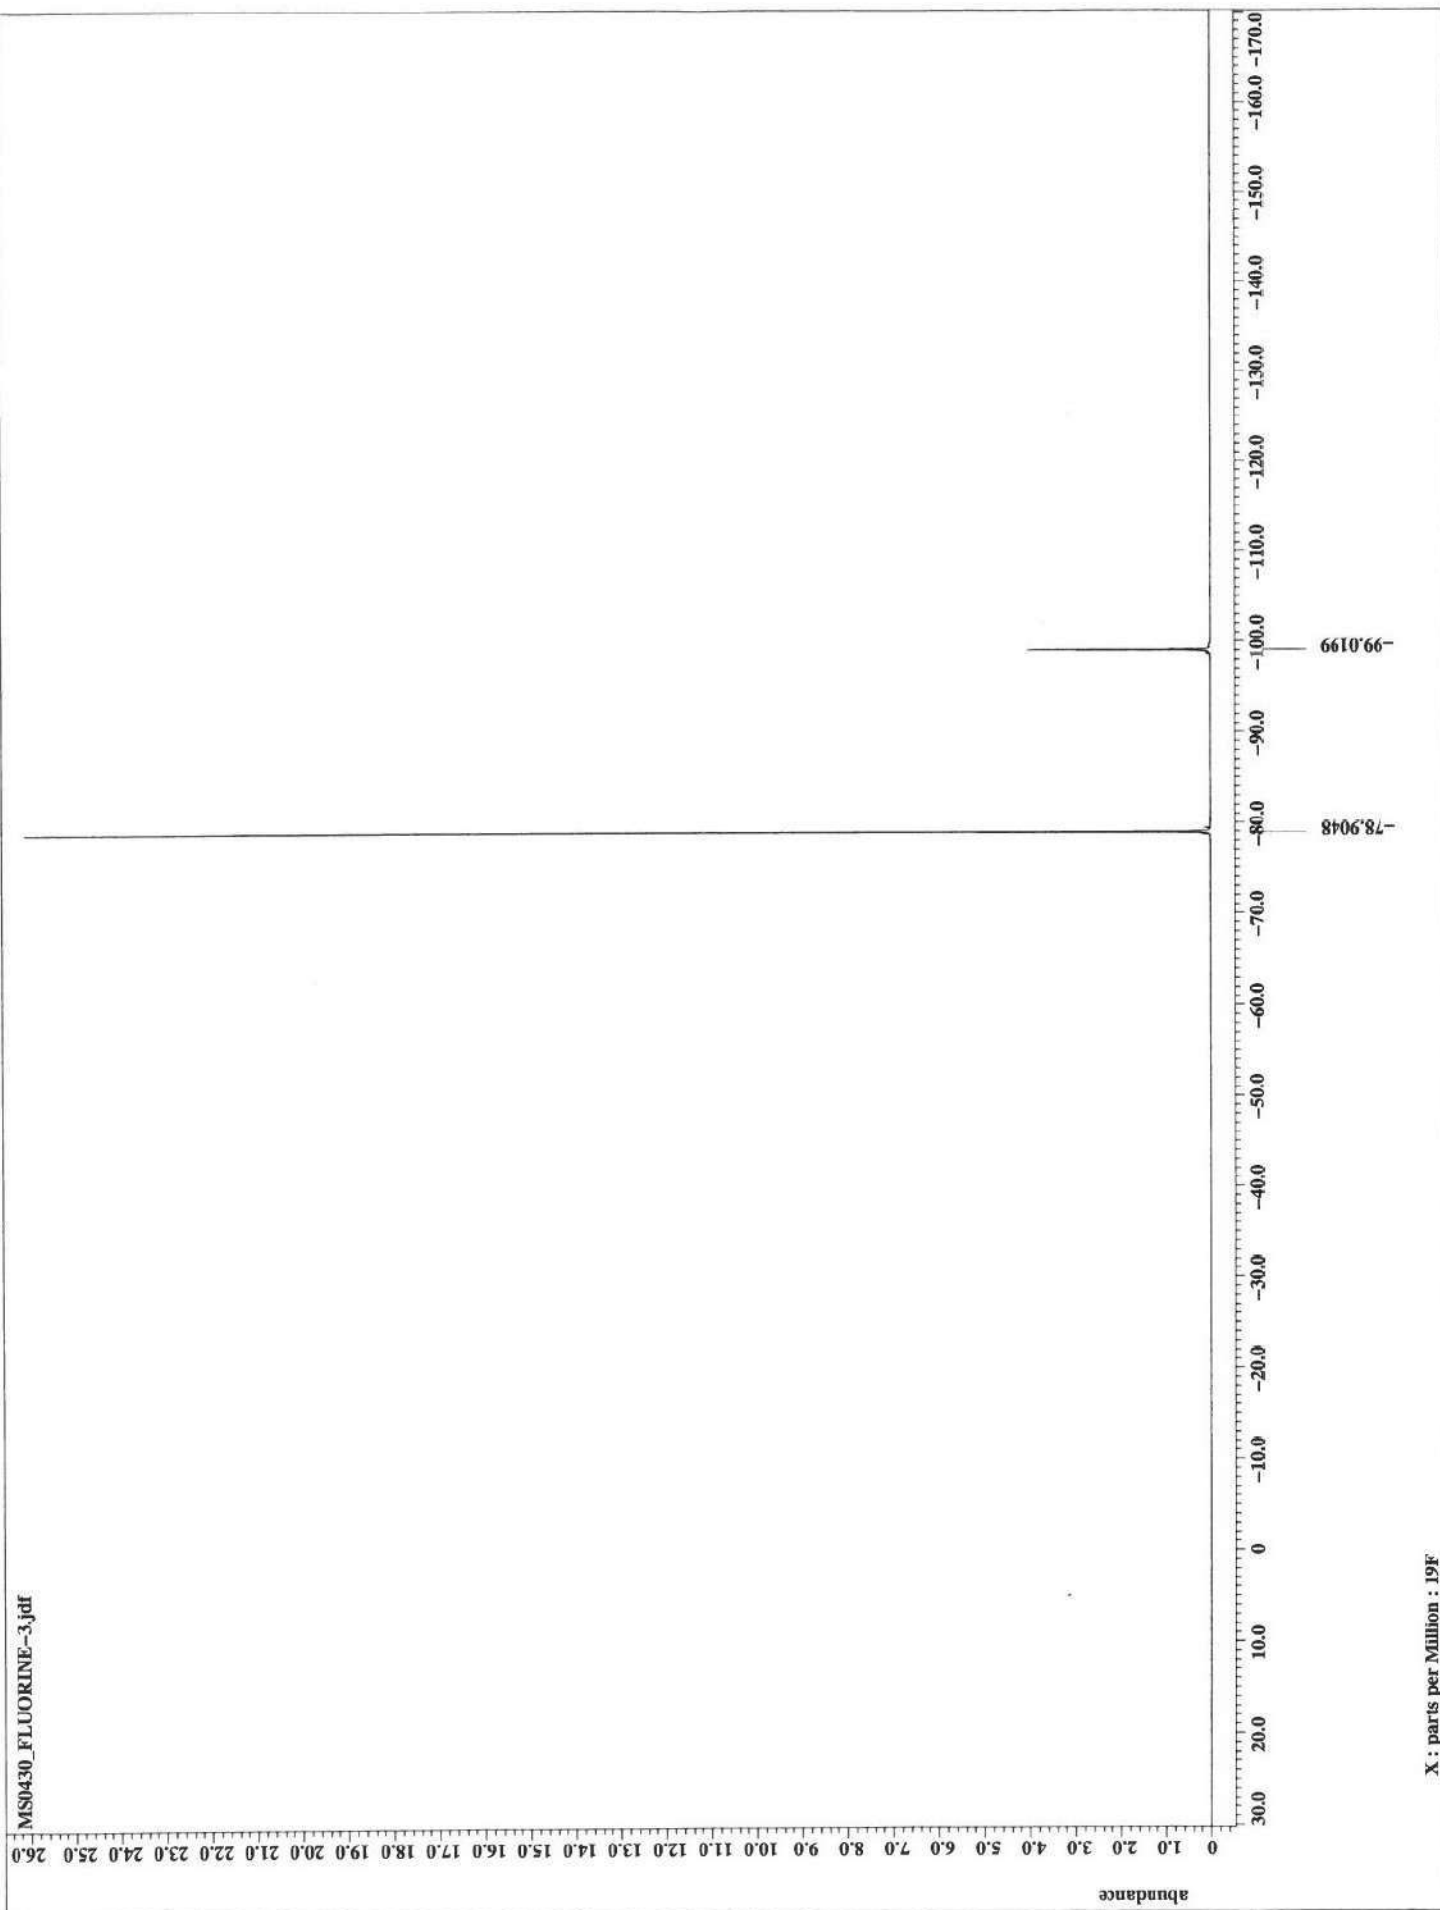

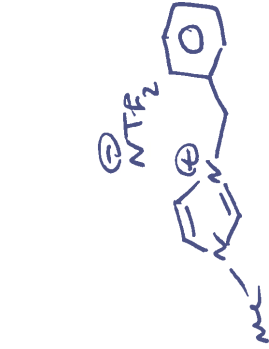

181.69

79.28

53.26

25.81

3.8147

5.2268

7.3362  
7.3305  
7.3247

8.6200

X : parts per Million : 1H

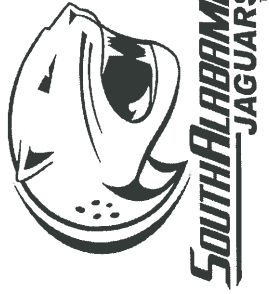

Filename = MS0499\_PROTON-2.jdf  
 Author = Jim Davis  
 Experiment = single\_pulse.ex2  
 Sample\_id = MS0499  
 Solvent = CHLOROFORM-D  
 Changer\_sample = 9  
 Creation\_time = 12-JUL-2018 18:21:04  
 Revision\_time = 12-JUL-2018 17:58:39  
 Current\_time = 12-JUL-2018 17:58:39  
 Data\_format = 1D COMPLEX  
 Dim\_size = 13107  
 Dim\_title = 1H  
 Dim\_units = [ppm]  
 Dimensions = X  
 Site = ECA 500  
 Spectrometer = JNM-ECA500  
 Field\_strength = 11.7473579[T] (500[MH  
 X\_acq\_duration = 1.74587904[s]  
 X\_domain = 1H  
 X\_freq = 500.15991521[MHz]  
 X\_offset = 5.0[ppm]  
 X\_points = 16384  
 X\_prescans = 1  
 X\_resolution = 0.57277737[Hz]  
 X\_sweep = 9.38438438[MHz]  
 Irr\_domain = 1H  
 Irr\_freq = 500.15991521[MHz]  
 Irr\_offset = 5.0[ppm]  
 Tri\_domain = 1H  
 Tri\_freq = 500.15991521[MHz]  
 Tri\_offset = 5.0[ppm]  
 Clipped = FALSE  
 Mod\_return = 1  
 Scans = 16  
 Total\_scans = 16  
 X\_90\_width = 12.4[us]  
 X\_acq\_time = 1.74587904[s]  
 X\_angle = 45[deg]  
 X\_atn = 4[db]  
 X\_pulse = 6.2[us]  
 Irr\_mode = Off  
 Tri\_mode = Off  
 Dante\_presat = FALSE  
 Initial\_wait = 1[s]  
 Recvr\_gain = 24  
 Relaxation\_delay = 4[s]  
 Repetition\_time = 5.74587904[s]  
 Temp\_get = 22.7[dc]

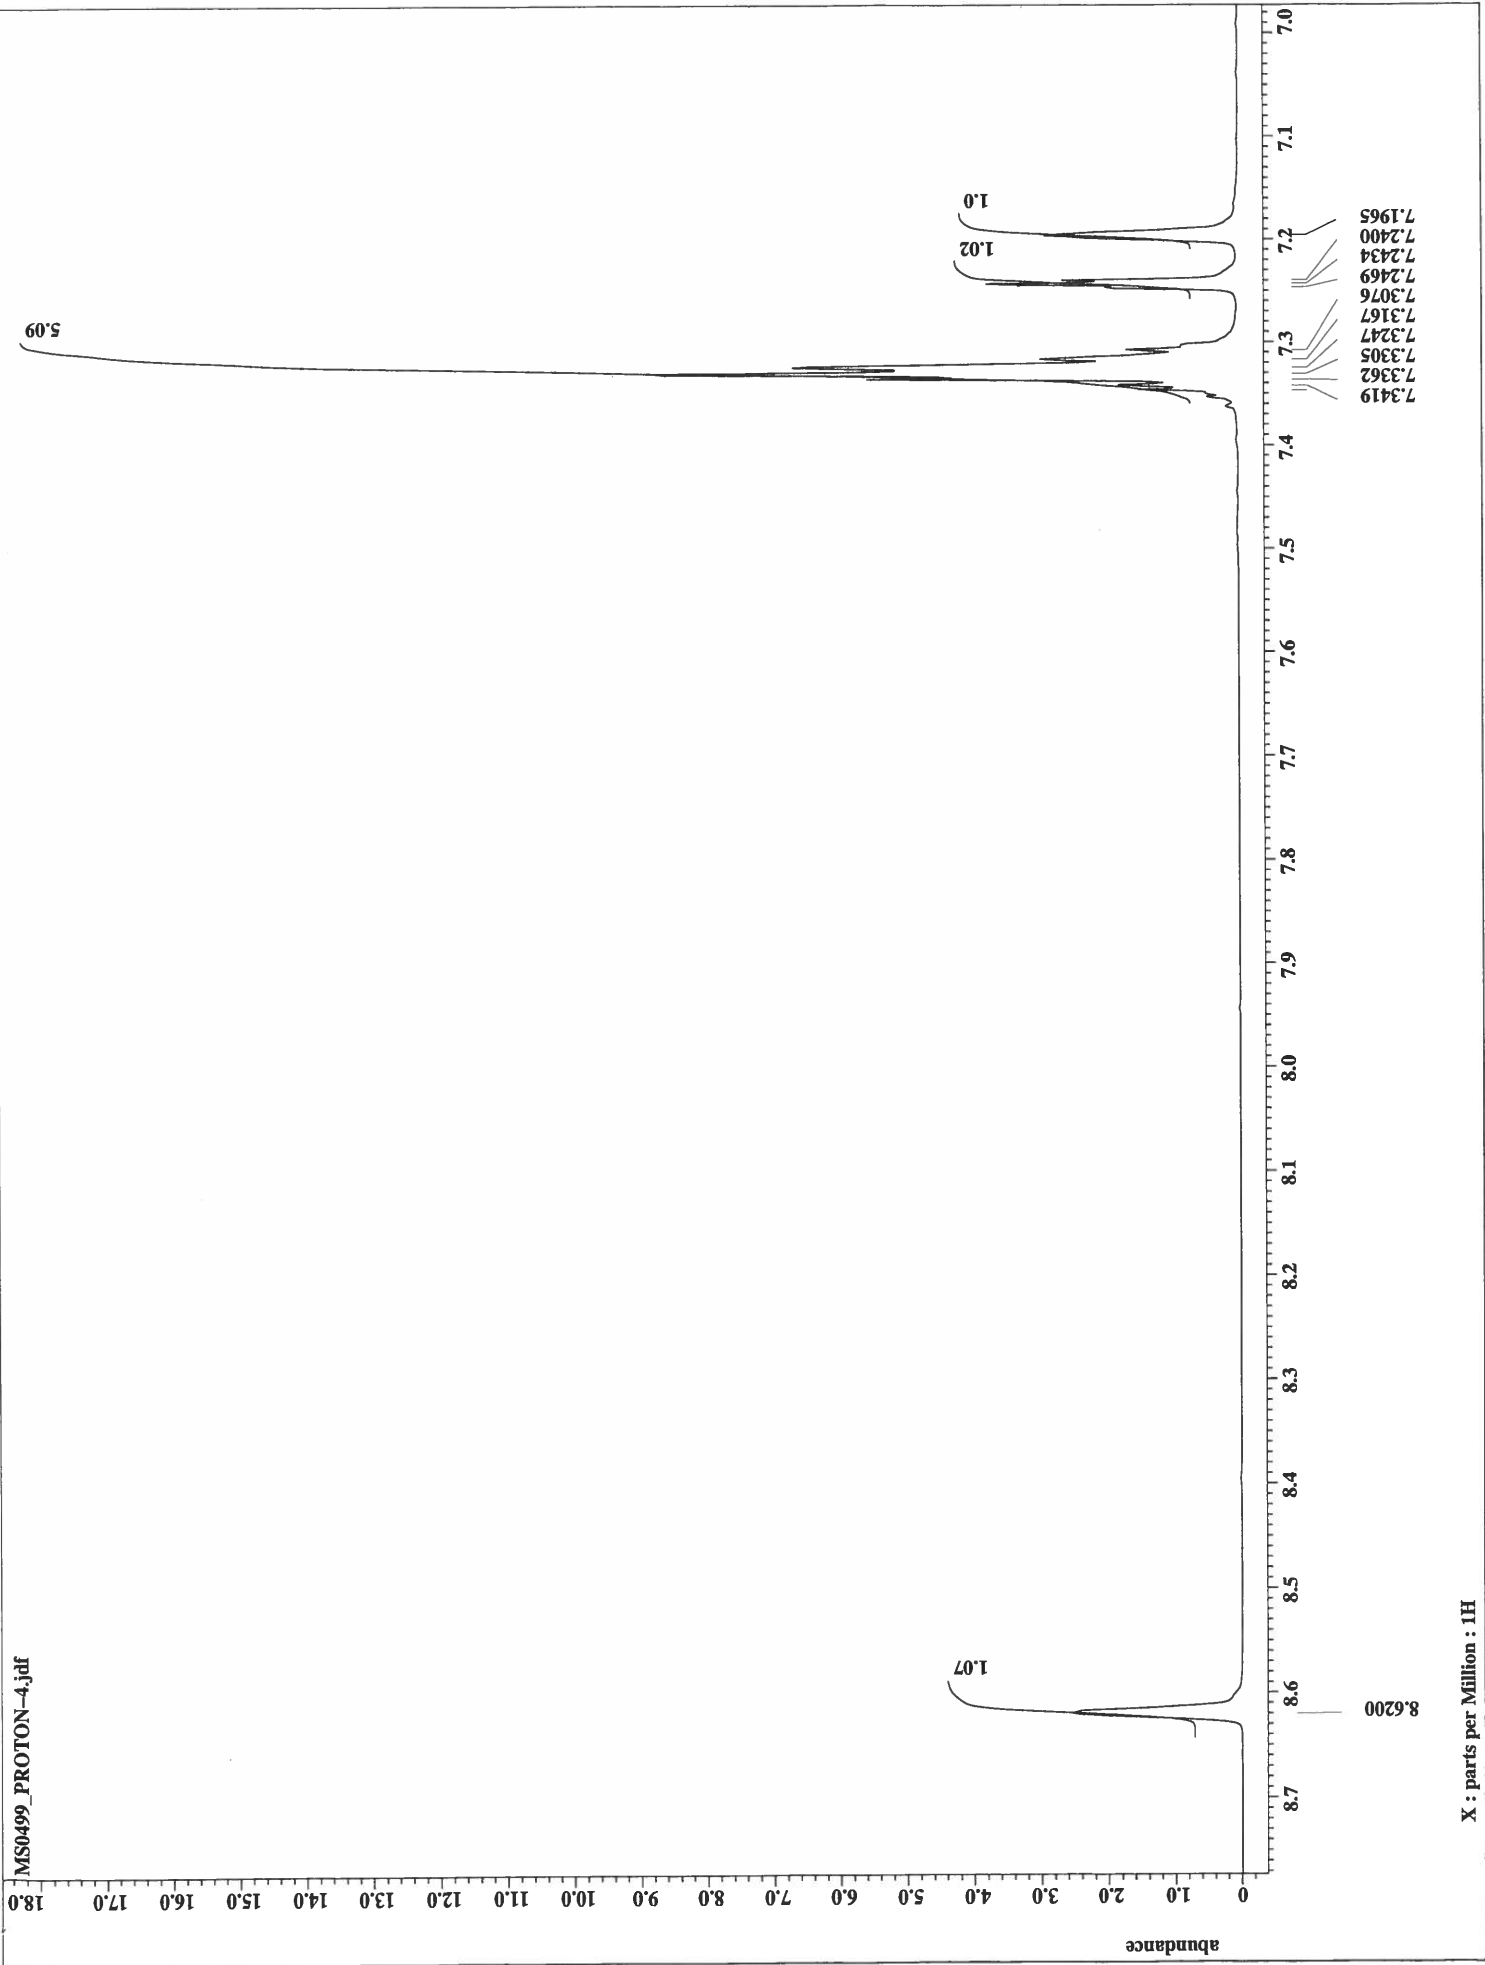



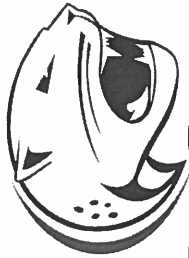
**SOUTH ALABAMA**  
**JAGUARS**

```

Filename      = MS0499_CARBON-2.jdf
Author       = Jim Davis
Experiment    = single_pulse_dec
Sample_id    = MS0499
Solvent      = CHLOROFORM-D
Charger_sample
Creation_time = 12-JUL-2018 18:33:38
Revision_time = 12-JUL-2018 18:11:15
Current_time  = 12-JUL-2018 18:11:15

Data_format  = 1D COMPLEX
Dim_size     = 26214
Dim_title    = 13C
Dim_units    = [ppm]
Dimensions   = X
Site         = ECA 500
Spectrometer = JNM-ECA500

Field_strength = 11.7473579[T] (500[MH
X_acq_duration = 0.83361792[s]
X_domain       = 13C
X_freq         = 125.76529768[MHz]
X_offset       = 100[ppm]
X_points       = 32768
X_prescans     = 4
X_resolution   = 1.19959034[Hz]
X_sweep        = 39.3081761[KHz]
Irr_domain     = 1H
Irr_freq       = 500.15991521[MHz]
Irr_offset     = 5.0[ppm]
Clipped        = FALSE
Mod_return     = 1
Scans          = 256
Total_scans    = 256

X_90_width     = 13.2[us]
X_acq_time     = 0.83361792[s]
X_angle        = 30[deg]
X_atn          = 6[db]
X_pulse        = 4.4[us]
Irr_atn_dec    = 20.7[db]
Irr_atn_noe    = 20.7[db]
Irr_noise      = WALTZ
Decoupling     = TRUE
Initial_wait   = 1[s]
Noe            = TRUE
Noe_time       = 2[s]
Recvr_gain     = 60
Relaxation_delay = 2[s]
Repetition_time = 2.83361792[s]
Temp_get       = 23.2[dc]
  
```

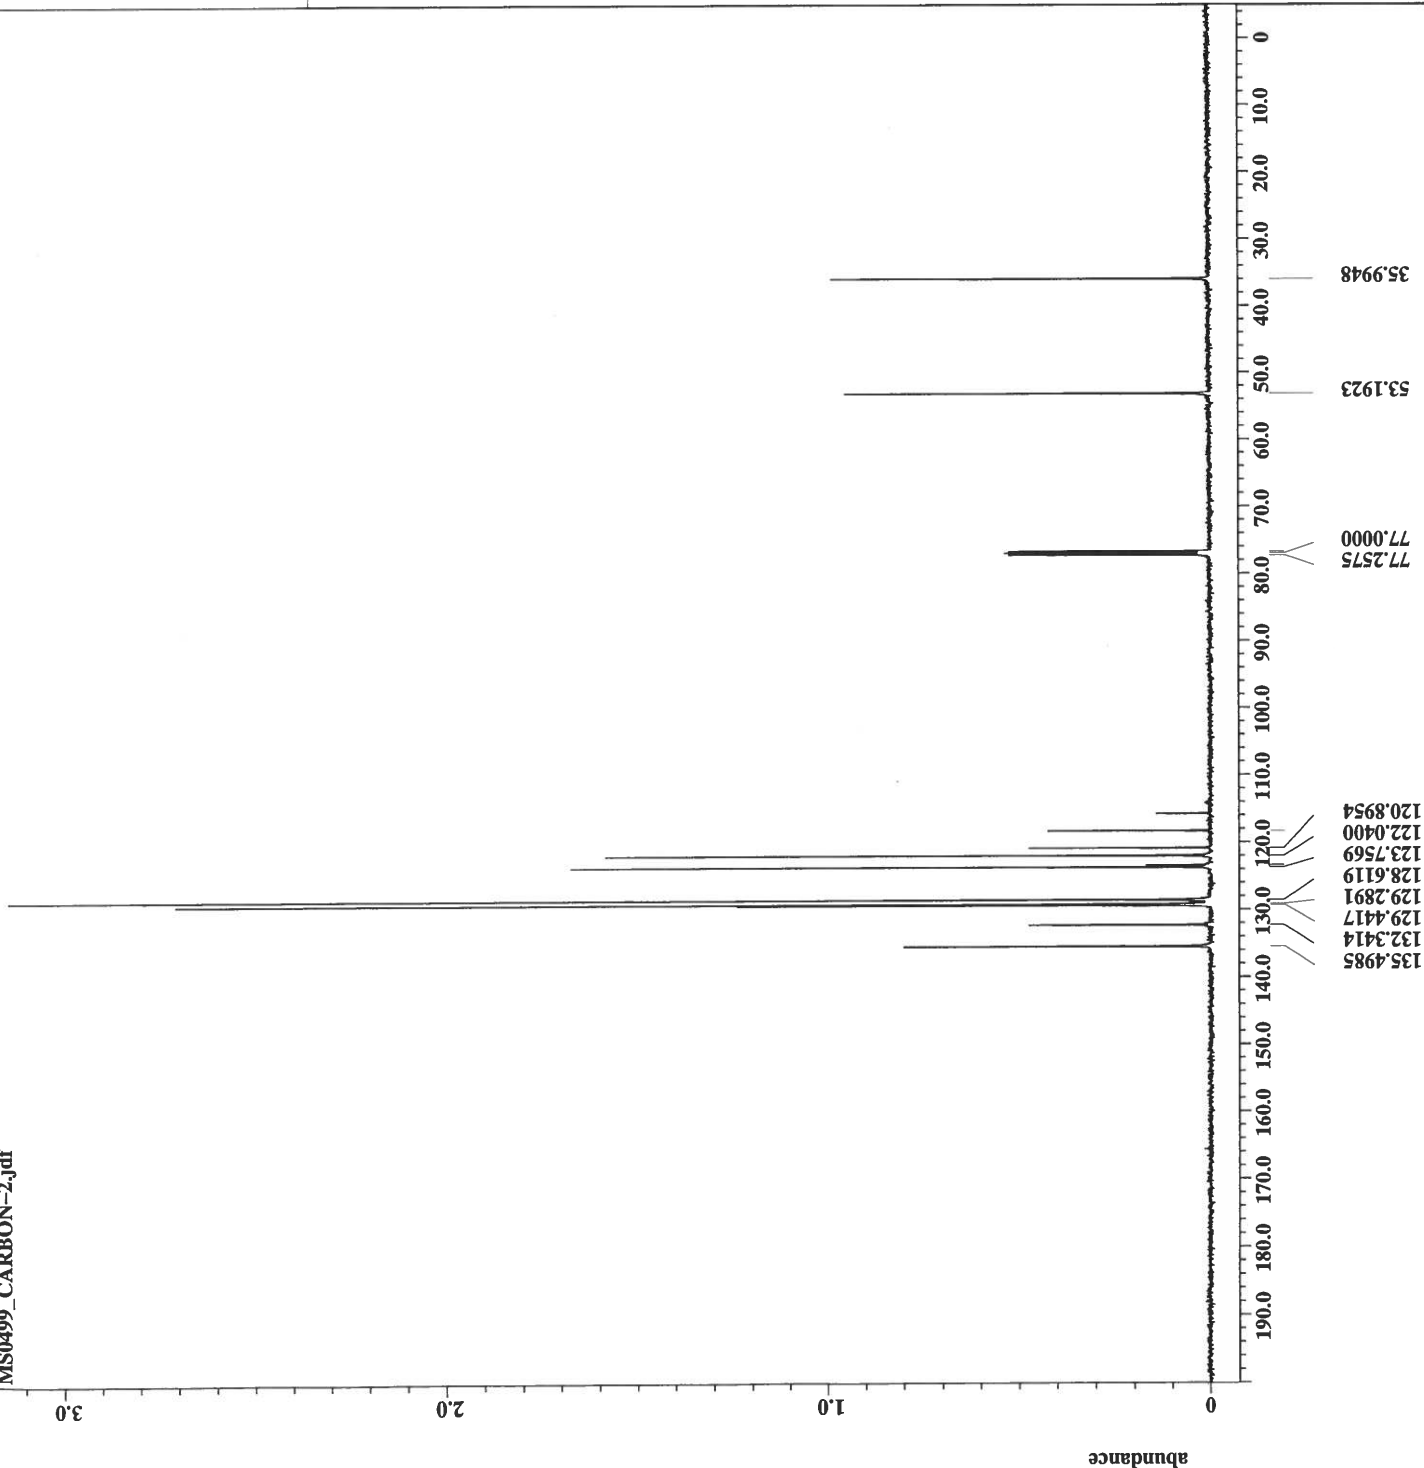

X : parts per Million : 13C

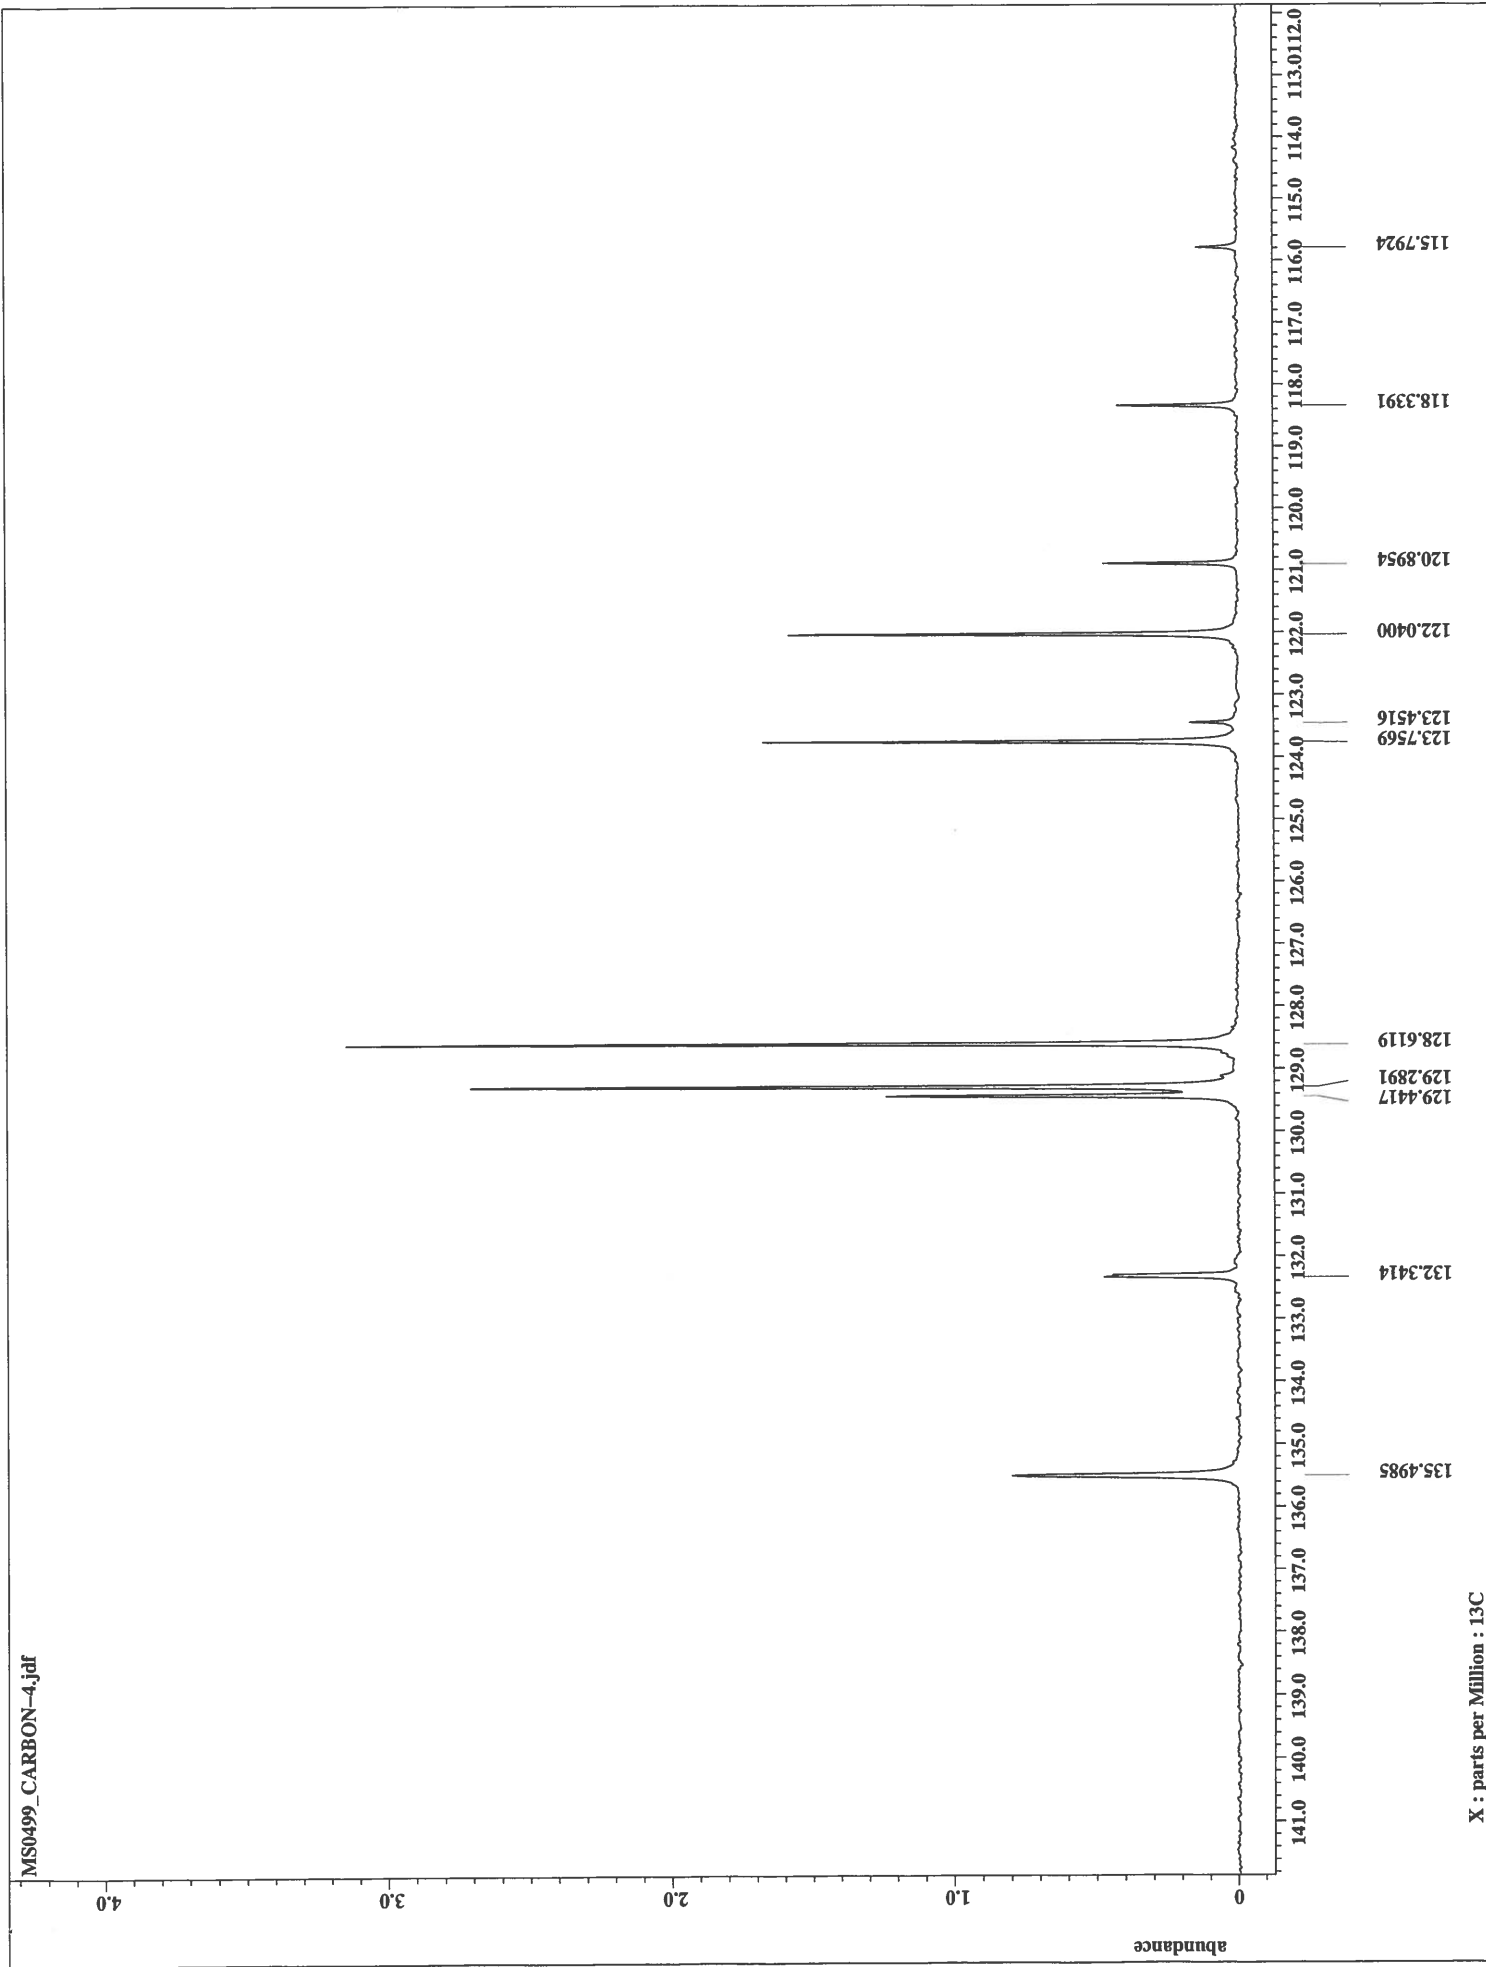

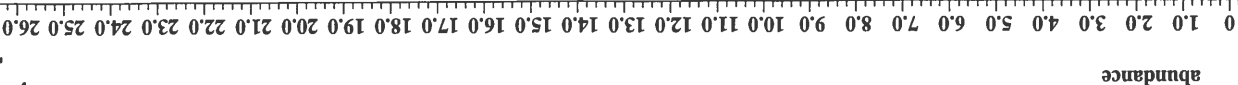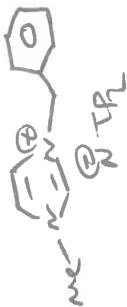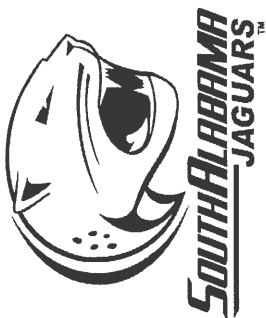

Filename = MS0499\_FLUORINE-2.jdf  
Author = Jim Davis  
Experiment = single\_pulse.ex2  
Sample\_id = MS0499  
Solvent = CHLOROFORM-D  
Changer\_sample = 9  
Creation\_time = 12-JUL-2018 16:38:27  
Revision\_time = 12-JUL-2018 16:16:04  
Current\_time = 12-JUL-2018 16:16:04  
Data\_format = 1D COMPLEX  
Dim\_size = 52428  
Dim\_title = 19F  
Dim\_units = [ppm]  
Dimensions = X  
Site = ECA 500  
Spectrometer = JNM-ECA500  
Field\_strength = 11.7473579 [T] (500 [MH  
X\_acq\_duration = 0.55574528 [s]  
X\_domain = 19F  
X\_freq = 470.62046084 [MHz]  
X\_offset = -70 [ppm]  
X\_points = 65536  
X\_prescans = 1  
X\_resolution = 1.7993855 [Hz]  
X\_sweep = 117.9245283 [kHz]  
Irr\_domain = 19F  
Irr\_freq = 470.62046084 [MHz]  
Irr\_offset = 5 [ppm]  
Tri\_domain = 19F  
Tri\_freq = 470.62046084 [MHz]  
Clipped = FALSE  
Mod\_return = 1  
Scans = 16  
Total\_scans = 16  
X\_90\_width = 13.1 [us]  
X\_acq\_time = 0.55574528 [s]  
X\_angle = 45 [deg]  
X\_atn = 2.5 [dB]  
X\_pulse = 6.55 [us]  
Irr\_mode = Off  
Tri\_mode = Off  
Dante\_presat = FALSE  
Initial\_wait = 1 [s]  
Recvr\_gain = 30  
Relaxation\_delay = 4 [s]  
Repetition\_time = 4.55574528 [s]  
Temp\_get = 22.5 [dC]

-79.0271

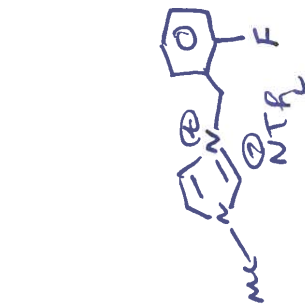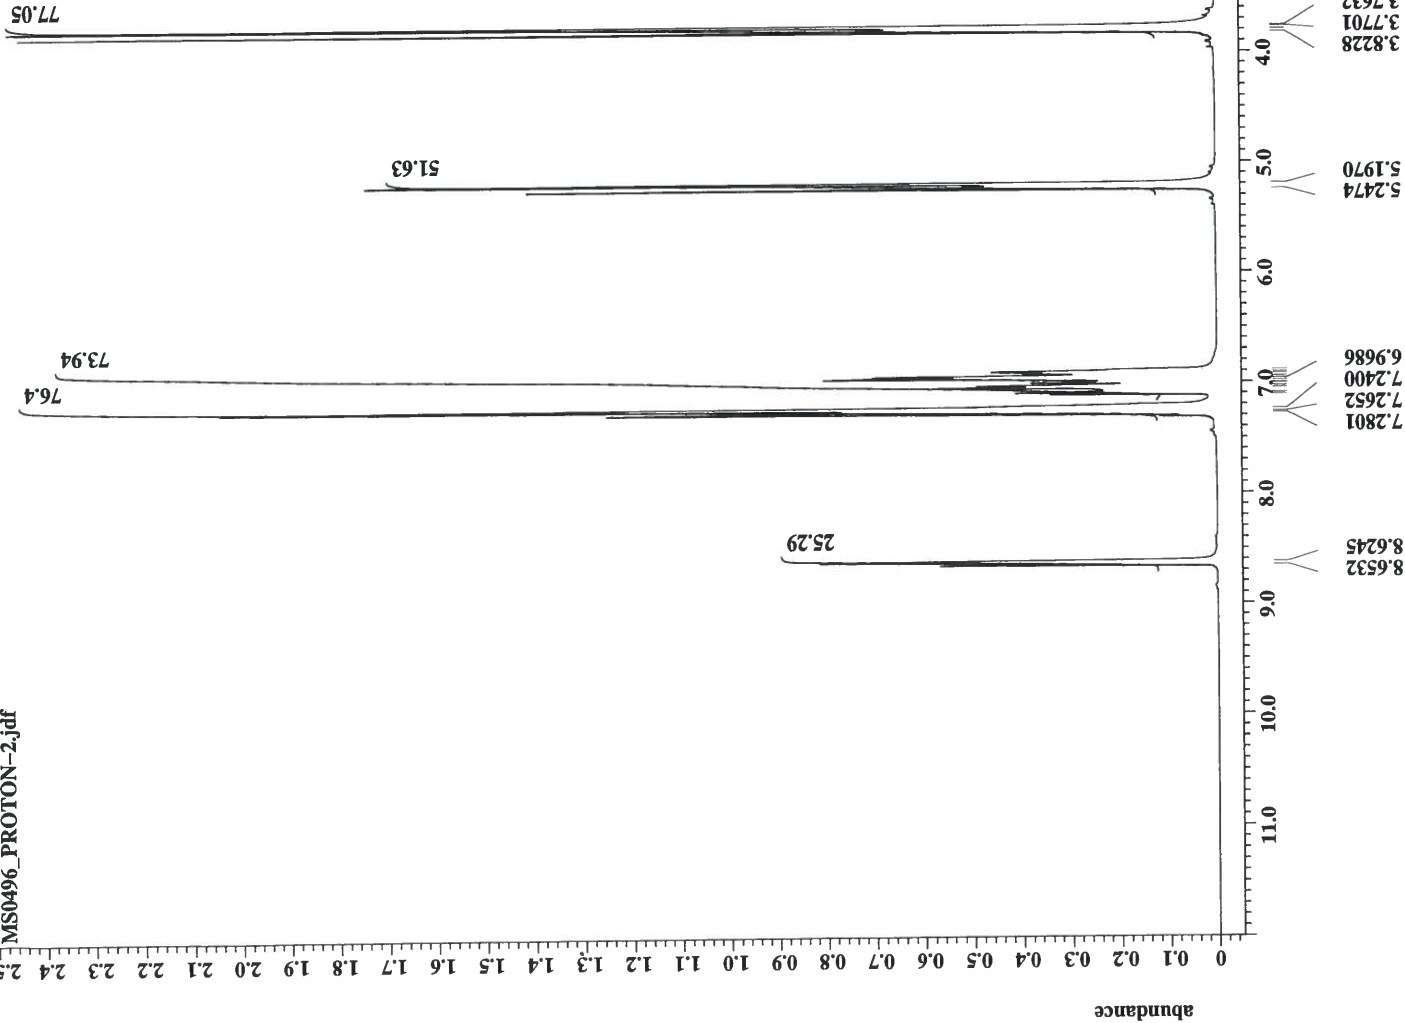

X : parts per Million : 1H

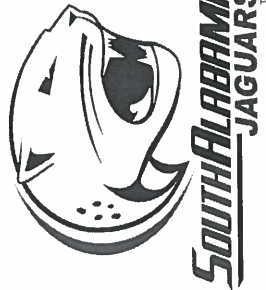

Filename = MS0496\_PROTON-2.jdf  
 Author = Jim Davis  
 Experiment = single\_pulse.ex2  
 Sample\_id = MS0496  
 Solvent = CHLOROFORM-D  
 Changer\_sample = 6  
 Creation\_time = 12-JUL-2018 17:39:41  
 Revision\_time = 12-JUL-2018 17:17:17  
 Current\_time = 12-JUL-2018 17:17:17  
 Data\_format = 1D COMPLEX  
 Dim\_size = 13107  
 Dim\_title = 1H  
 Dim\_units = [ppm]  
 Dimensions = X  
 Site = ECA 500  
 Spectrometer = JNM-ECA500  
 Field\_strength = 11.7473579[T] (500 [MH  
 X\_acq\_duration = 1.74587904[s]  
 X\_domain = 1H  
 X\_freq = 500.15991521 [MHz]  
 X\_offset = 5.0 [ppm]  
 X\_points = 16384  
 X\_prescans = 1  
 X\_resolution = 0.57277737 [Hz]  
 X\_sweep = 9.38438438 [kHz]  
 Irr\_domain = 1H  
 Irr\_freq = 500.15991521 [MHz]  
 Irr\_offset = 5.0 [ppm]  
 Tri\_domain = 1H  
 Tri\_freq = 500.15991521 [MHz]  
 Tri\_offset = 5.0 [ppm]  
 Clipped = FALSE  
 Mod\_return = 1  
 Scans = 16  
 Total\_scans = 16  
 X\_90\_width = 12.4 [us]  
 X\_acq\_time = 1.74587904 [s]  
 X\_angle = 45 [deg]  
 X\_atn = 4 [dB]  
 X\_pulse = 6.2 [us]  
 Irr\_mode = Off  
 Tri\_mode = Off  
 Pulse\_presat = FALSE  
 Initial\_wait = 1 [s]  
 Recvr\_gain = 22  
 Relaxation\_delay = 4 [s]  
 Repetition\_time = 5.74587904 [s]  
 Temp\_get = 22.5 [dC]

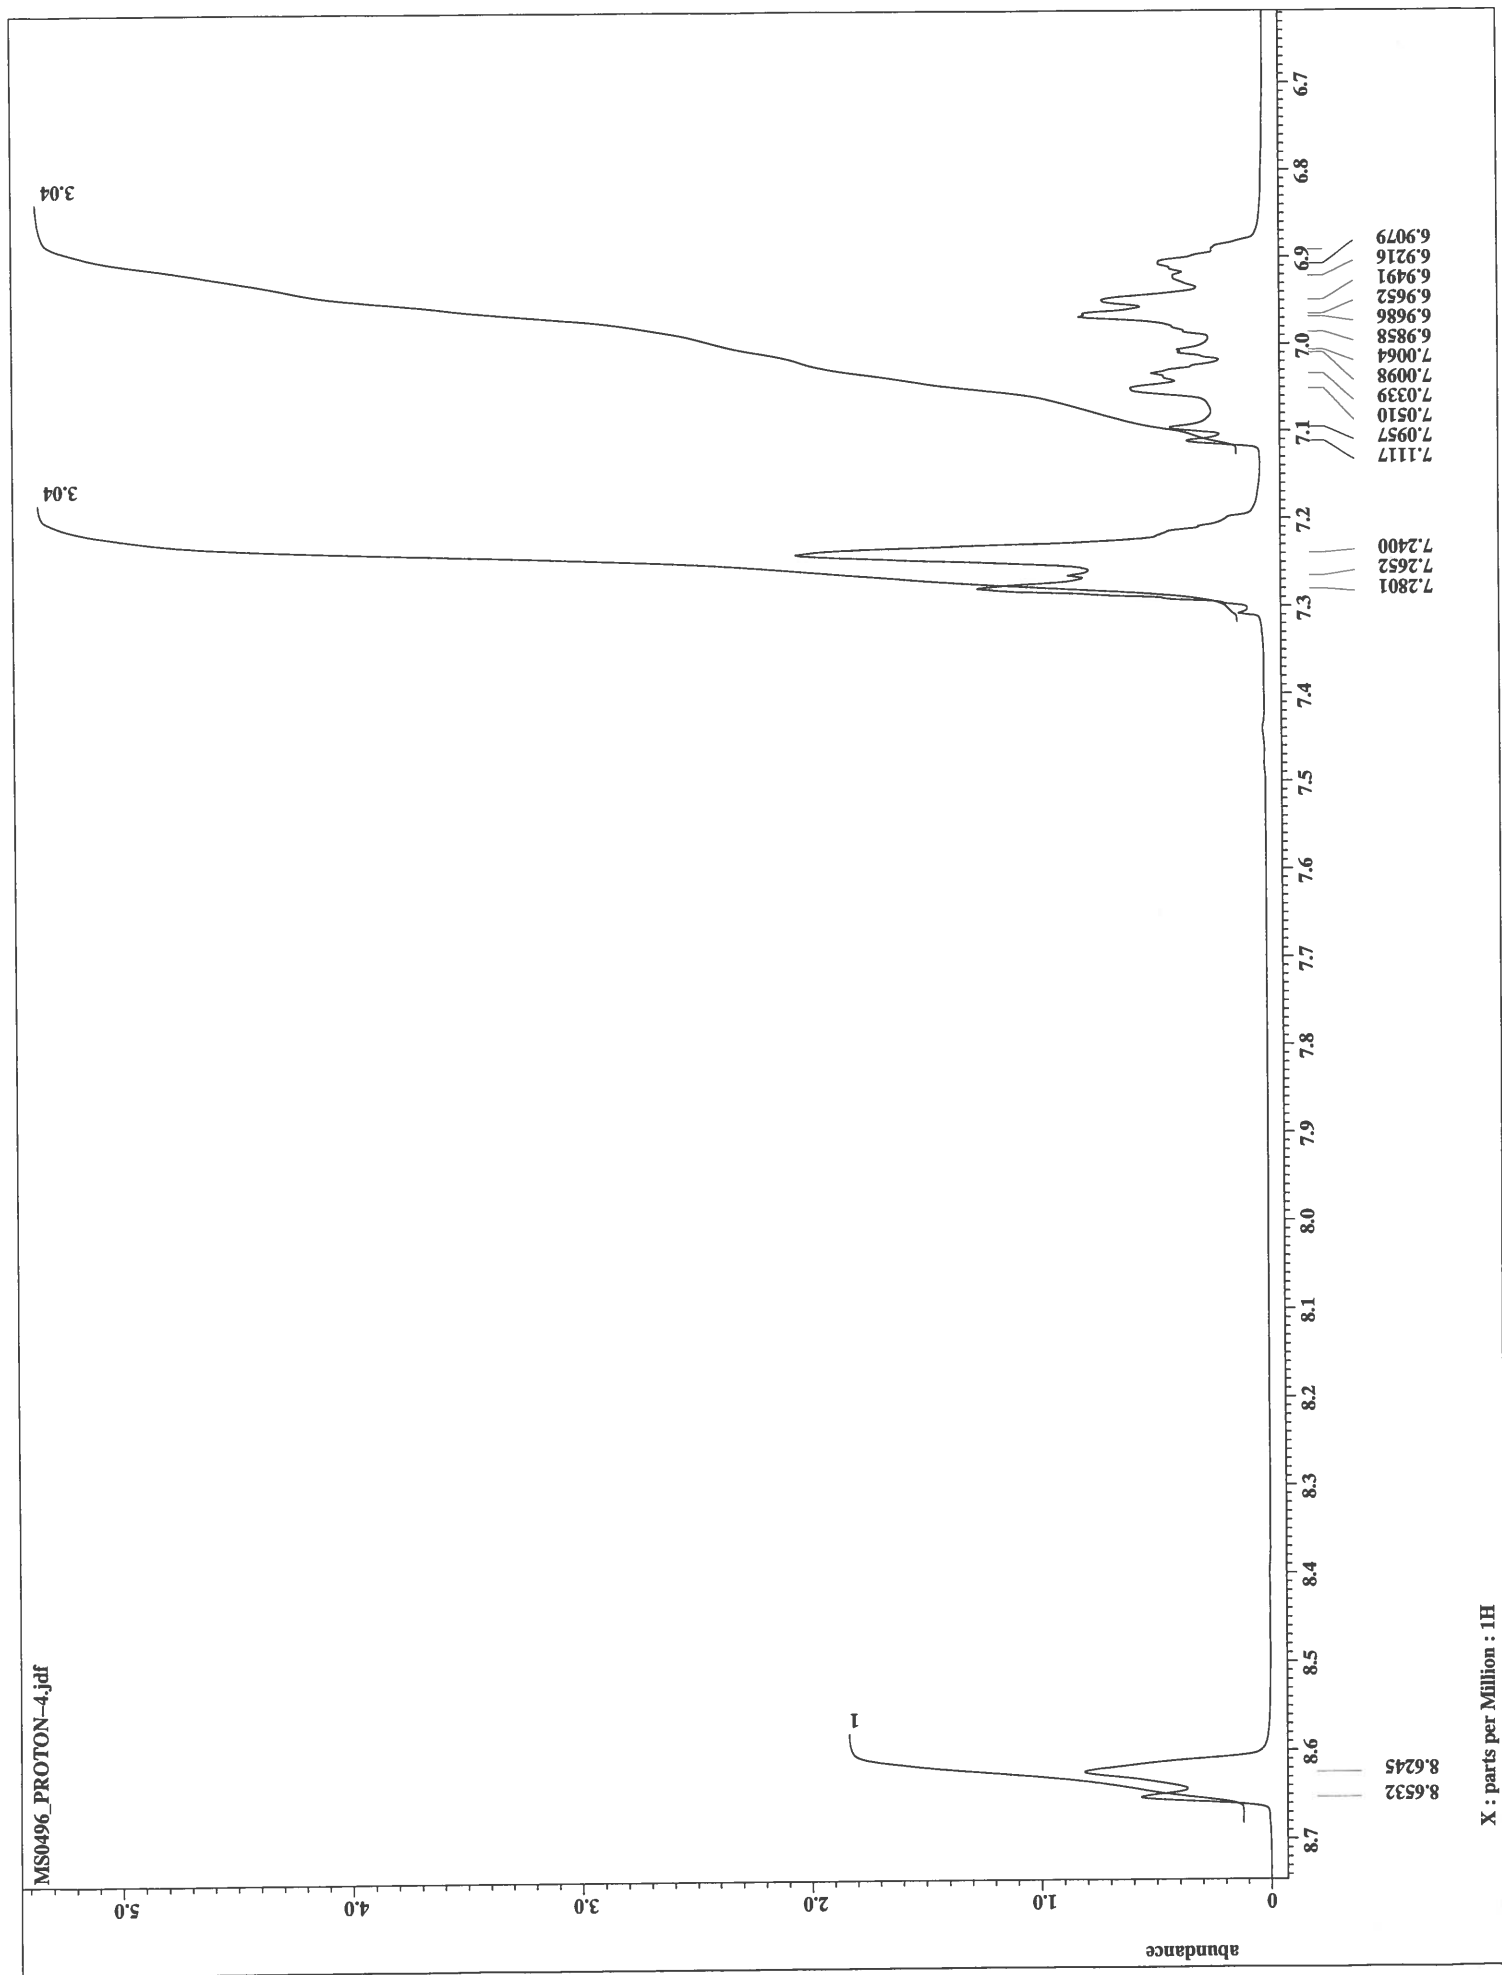

X : parts per Million : 1H

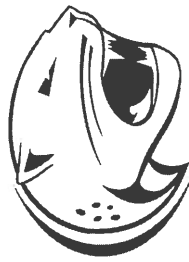

**SOUTH ALABAMA**  
**JAGUARS**

Filename = MS0496\_CARBON-2.jdf  
 Author = Jim Davis  
 Experiment = single\_pulse\_dec  
 Sample\_id = MS0496  
 Solvent = CHLOROFORM-D  
 Changer\_sample = 6  
 Creation\_time = 12-JUL-2018 17:54:02  
 Revision\_time = 12-JUL-2018 17:31:38  
 Current\_time = 12-JUL-2018 17:31:38  
 Data\_format = 1D COMPLEX  
 Dim\_size = 26214  
 Dim\_title = 13C  
 Dim\_units = [ppm]  
 Dimensions = X  
 Site = ECA 500  
 Spectrometer = JNM-ECA500  
 Field\_strength = 11.7473579[T] (500[MH  
 X\_acq\_duration = 0.83361792[s]  
 X\_domain = 13C  
 X\_freq = 125.76529768[MHz]  
 X\_offset = 100[ppm]  
 X\_points = 32768  
 X\_prescans = 4  
 X\_resolution = 1.19959034[Hz]  
 X\_sweep = 39.3081761[KHz]  
 Irr\_domain = 1H  
 Irr\_freq = 500.15991521[MHz]  
 Irr\_offset = 5.0[ppm]  
 Clipped = FALSE  
 Mod\_return = 1  
 Scans = 256  
 Total\_scans = 256  
 X\_90\_width = 13.2[us]  
 X\_acq\_time = 0.83361792[s]  
 X\_angle = 30[deg]  
 X\_atn = 6[db]  
 X\_pulse = 4.4[us]  
 Irr\_atn\_dec = 20.7[db]  
 Irr\_atn\_noe = 20.7[db]  
 Irr\_noise = WALTZ  
 Decoupling = TRUE  
 Initial\_wait = 1[s]  
 Noe\_time = TRUE  
 Recvr\_gain = 2[s]  
 Relaxation\_delay = 60  
 Repetition\_time = 2.83361792[s]  
 Temp\_get = 23[dc]

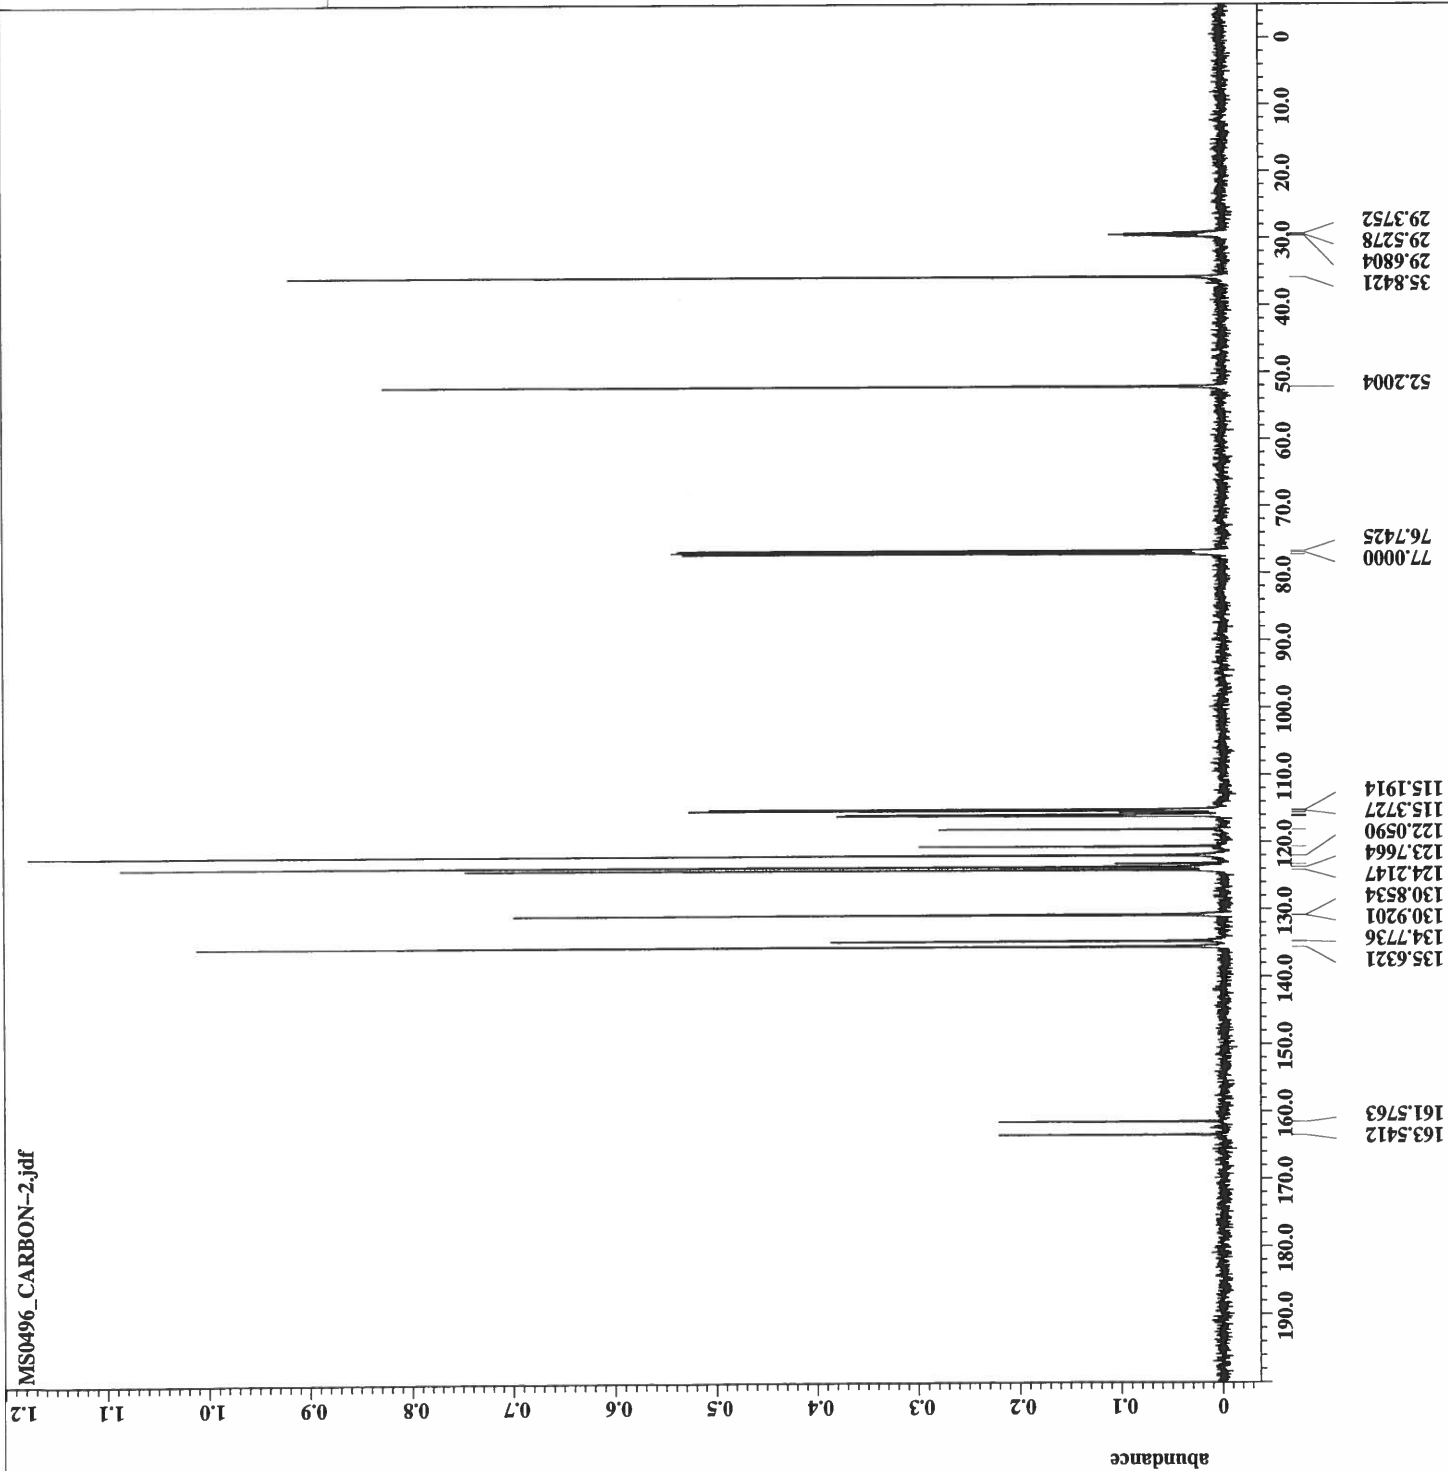

X : parts per Million : 13C

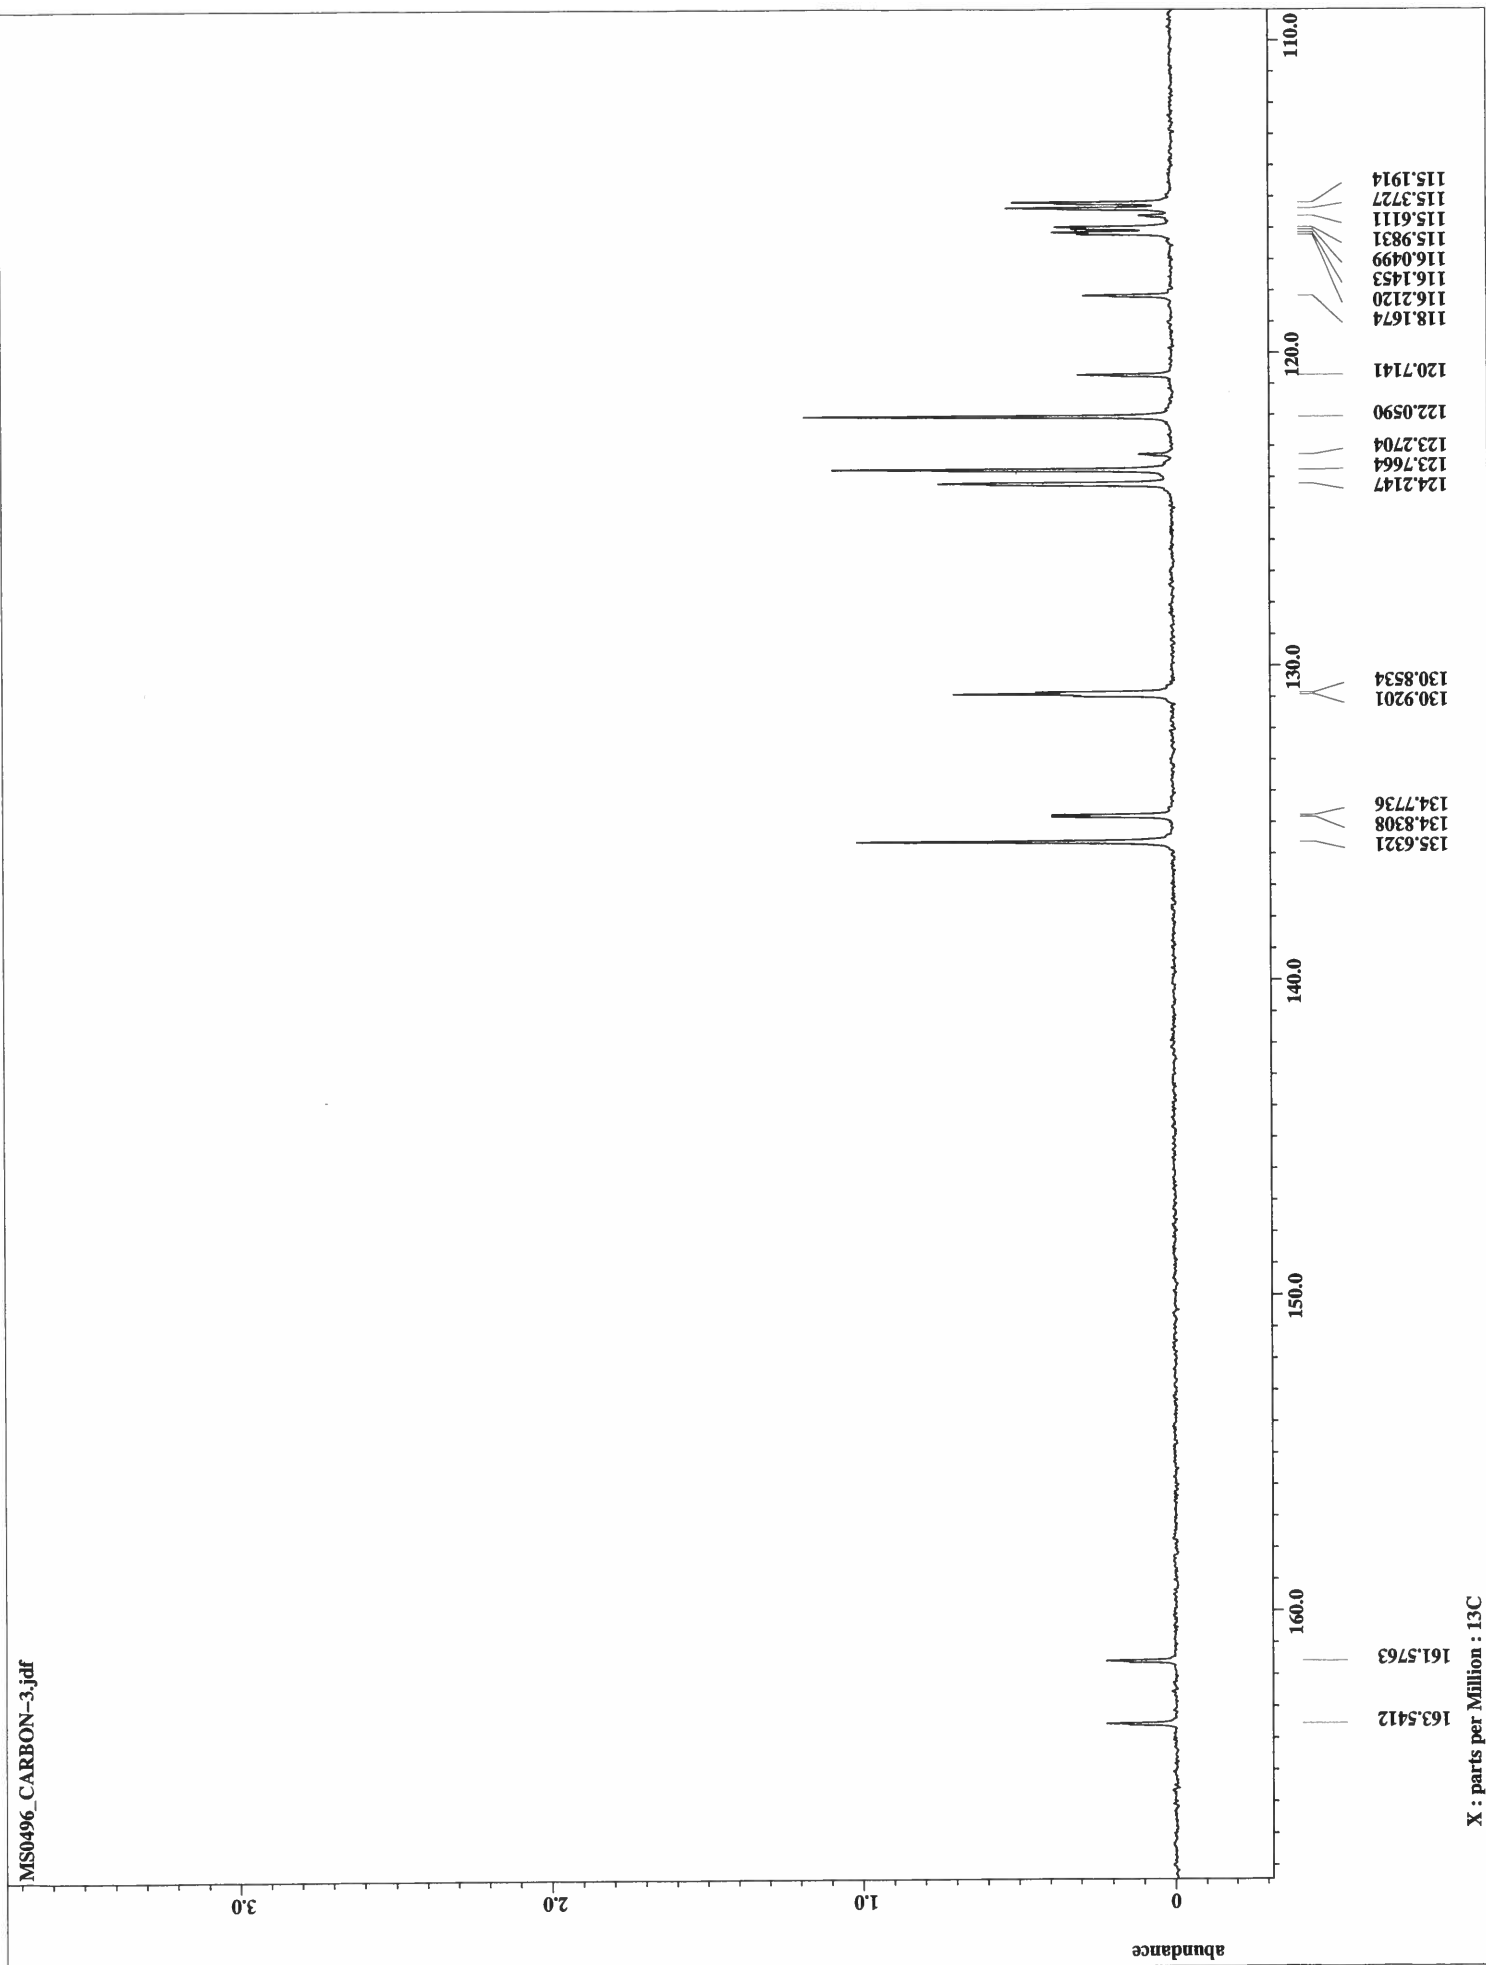

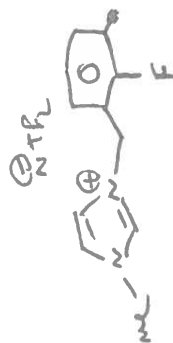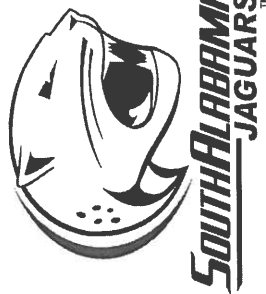

Filename = MS0496\_FLUORINE-2.jdf  
 Author = Jim Davis  
 Experiment = single\_pulse.ex2  
 Sample\_id = MS0496  
 Solvent = CHLOROFORM-D  
 Changer\_sample = 6  
 Creation\_time = 12-JUL-2018 16:18:09  
 Revision\_time = 12-JUL-2018 15:55:46  
 Current\_time = 12-JUL-2018 15:55:46  
 Data\_format = 1D COMPLEX  
 Dim\_size = 52428  
 Dim\_title = 19F  
 Dim\_units = [ppm]  
 Dimensions = X  
 Site = ECA 500  
 Spectrometer = JNM-ECA500  
 Field\_strength = 11.7473579 [T] (500 [MH  
 X\_acq\_duration = 0.55574528 [s]  
 X\_domain = 19F  
 X\_freq = 470.62046084 [MHz]  
 X\_offset = -70 [ppm]  
 X\_points = 65536  
 X\_prescans = 1  
 X\_resolution = 1.7993855 [Hz]  
 X\_sweep = 117.9245283 [kHz]  
 Irr\_domain = 19F  
 Irr\_freq = 470.62046084 [MHz]  
 Irr\_offset = 5 [ppm]  
 Tri\_domain = 19F  
 Tri\_freq = 470.62046084 [MHz]  
 Tri\_offset = 5 [ppm]  
 Clipped = FALSE  
 Mod\_return = 1  
 Scans = 16  
 Total\_scans = 16  
 X\_90\_width = 13.1 [us]  
 X\_acq\_time = 0.55574528 [s]  
 X\_angle = 45 [deg]  
 X\_atn = 2.5 [dB]  
 X\_pulse = 6.55 [us]  
 Irr\_mode = Off  
 Tri\_mode = Off  
 Dante\_presat = FALSE  
 Initial\_wait = 1 [s]  
 Recvr\_gain = 26  
 Relaxation\_delay = 4 [s]  
 Repetition\_time = 4.55574528 [s]  
 Temp\_get = 22.5 [dC]

-111.7825

-79.2642  
-79.2833



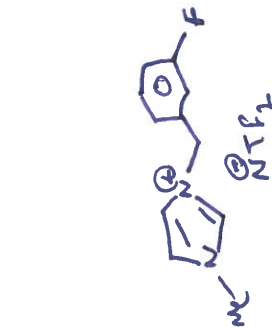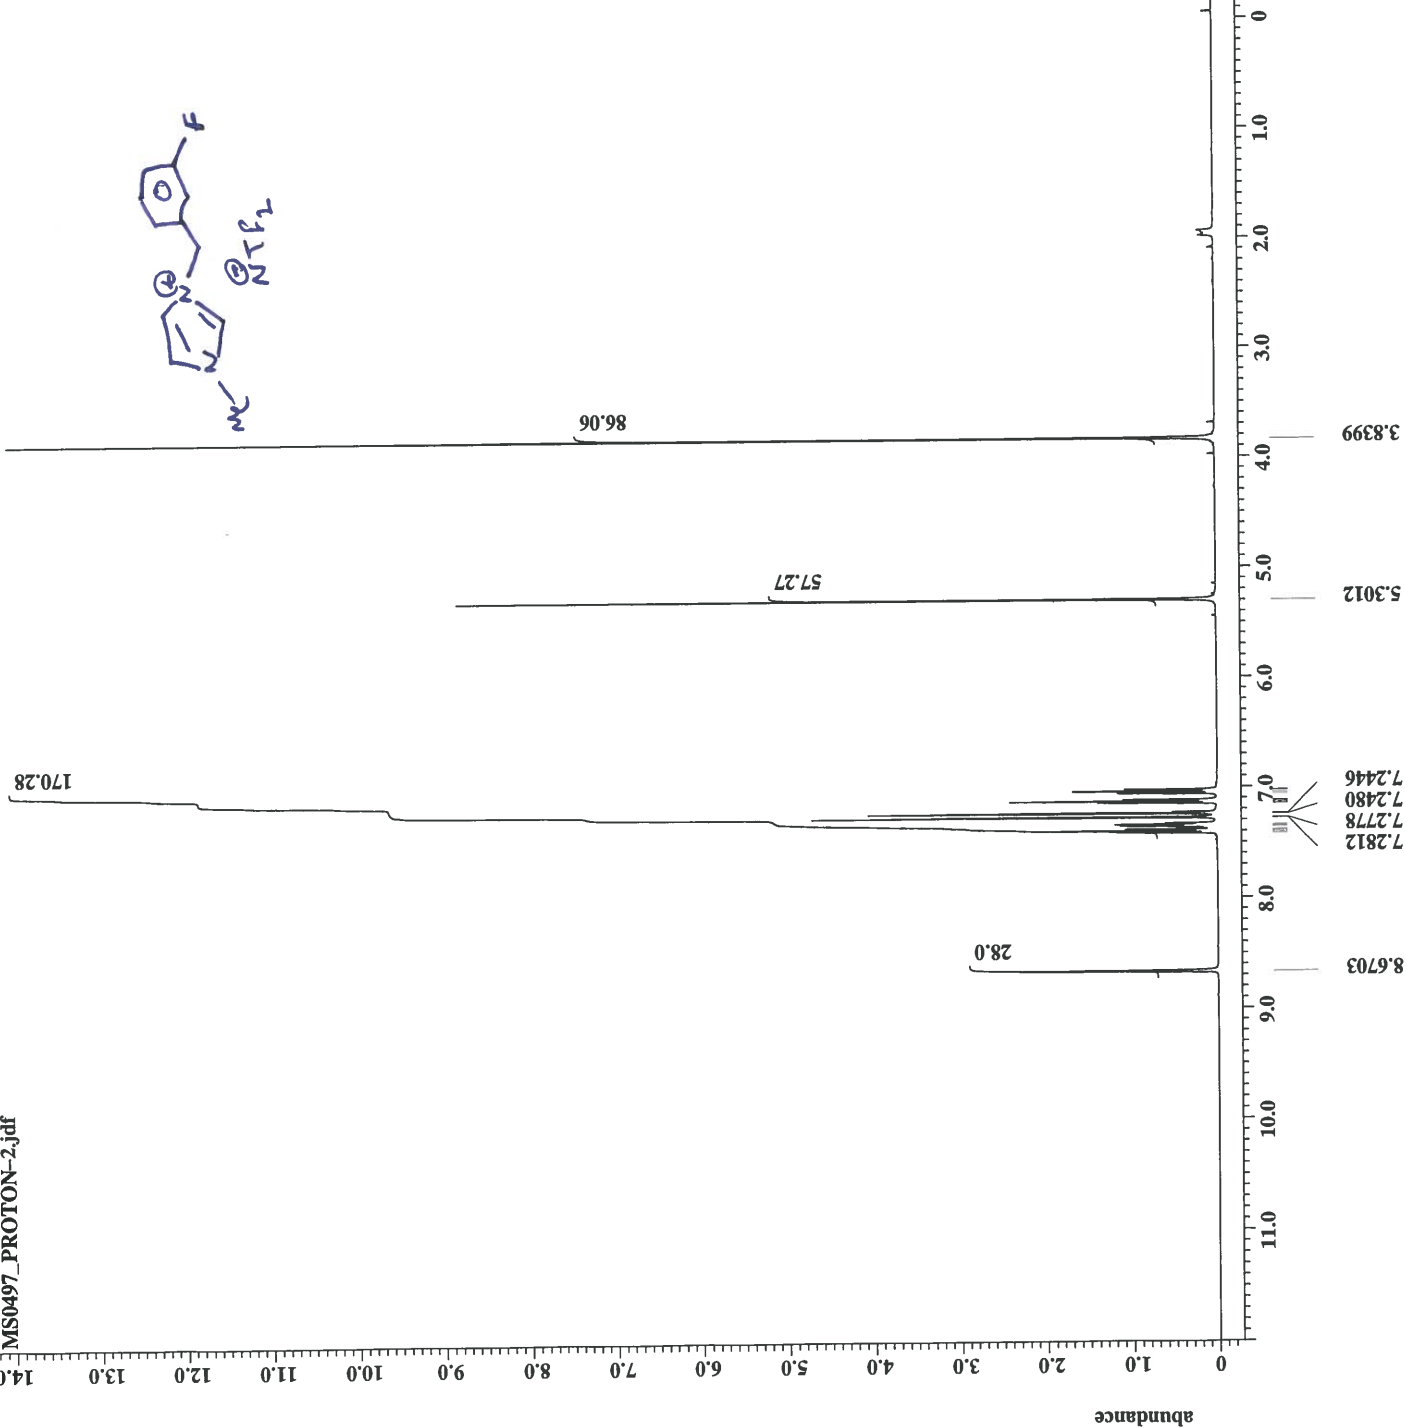

X : parts per Million : 1H

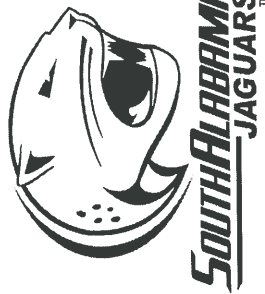

Filename = MS0497\_PROTON-2.jdf  
 Author = Jim Davis  
 Experiment = single\_pulse.ex2  
 Sample\_id = MS0497  
 Solvent = CHLOROFORM-D  
 Changer\_sample = 7  
 Creation\_time = 12-JUL-2018 18:01:19  
 Revision\_time = 12-JUL-2018 17:38:55  
 Current\_time = 12-JUL-2018 17:38:55  
 Data\_format = 1D COMPLEX  
 Dim\_size = 13107  
 Dim\_title = 1H  
 Dim\_units = [ppm]  
 Dimensions = X  
 Site = ECA 500  
 Spectrometer = JNM-ECA500  
 Field\_strength = 11.7473579[T] (500[MH  
 X\_acq\_duration = 1.74587904[s]  
 X\_domain = 1H  
 X\_freq = 500.15991521[MHz]  
 X\_offset = 5.0[ppm]  
 X\_points = 16384  
 X\_prescans = 1  
 X\_resolution = 0.57277737[Hz]  
 X\_sweep = 9.38438438[MHz]  
 Irr\_domain = 1H  
 Irr\_freq = 500.15991521[MHz]  
 Irr\_offset = 5.0[ppm]  
 Tri\_domain = 1H  
 Tri\_freq = 500.15991521[MHz]  
 Tri\_offset = 5.0[ppm]  
 Clipped = FALSE  
 Mod\_return = 1  
 Scans = 16  
 Total\_scans = 16  
 X\_90\_width = 12.4[us]  
 X\_acq\_time = 1.74587904[s]  
 X\_angle = 45[deg]  
 X\_atn = 4[db]  
 X\_pulse = 6.2[us]  
 Irr\_mode = Off  
 Tri\_mode = Off  
 Dante\_preset = FALSE  
 Initial\_wait = 1[s]  
 Recvr\_gain = 28  
 Relaxation\_delay = 4[s]  
 Repetition\_time = 5.74587904[s]  
 Temp\_get = 22.7[dc]

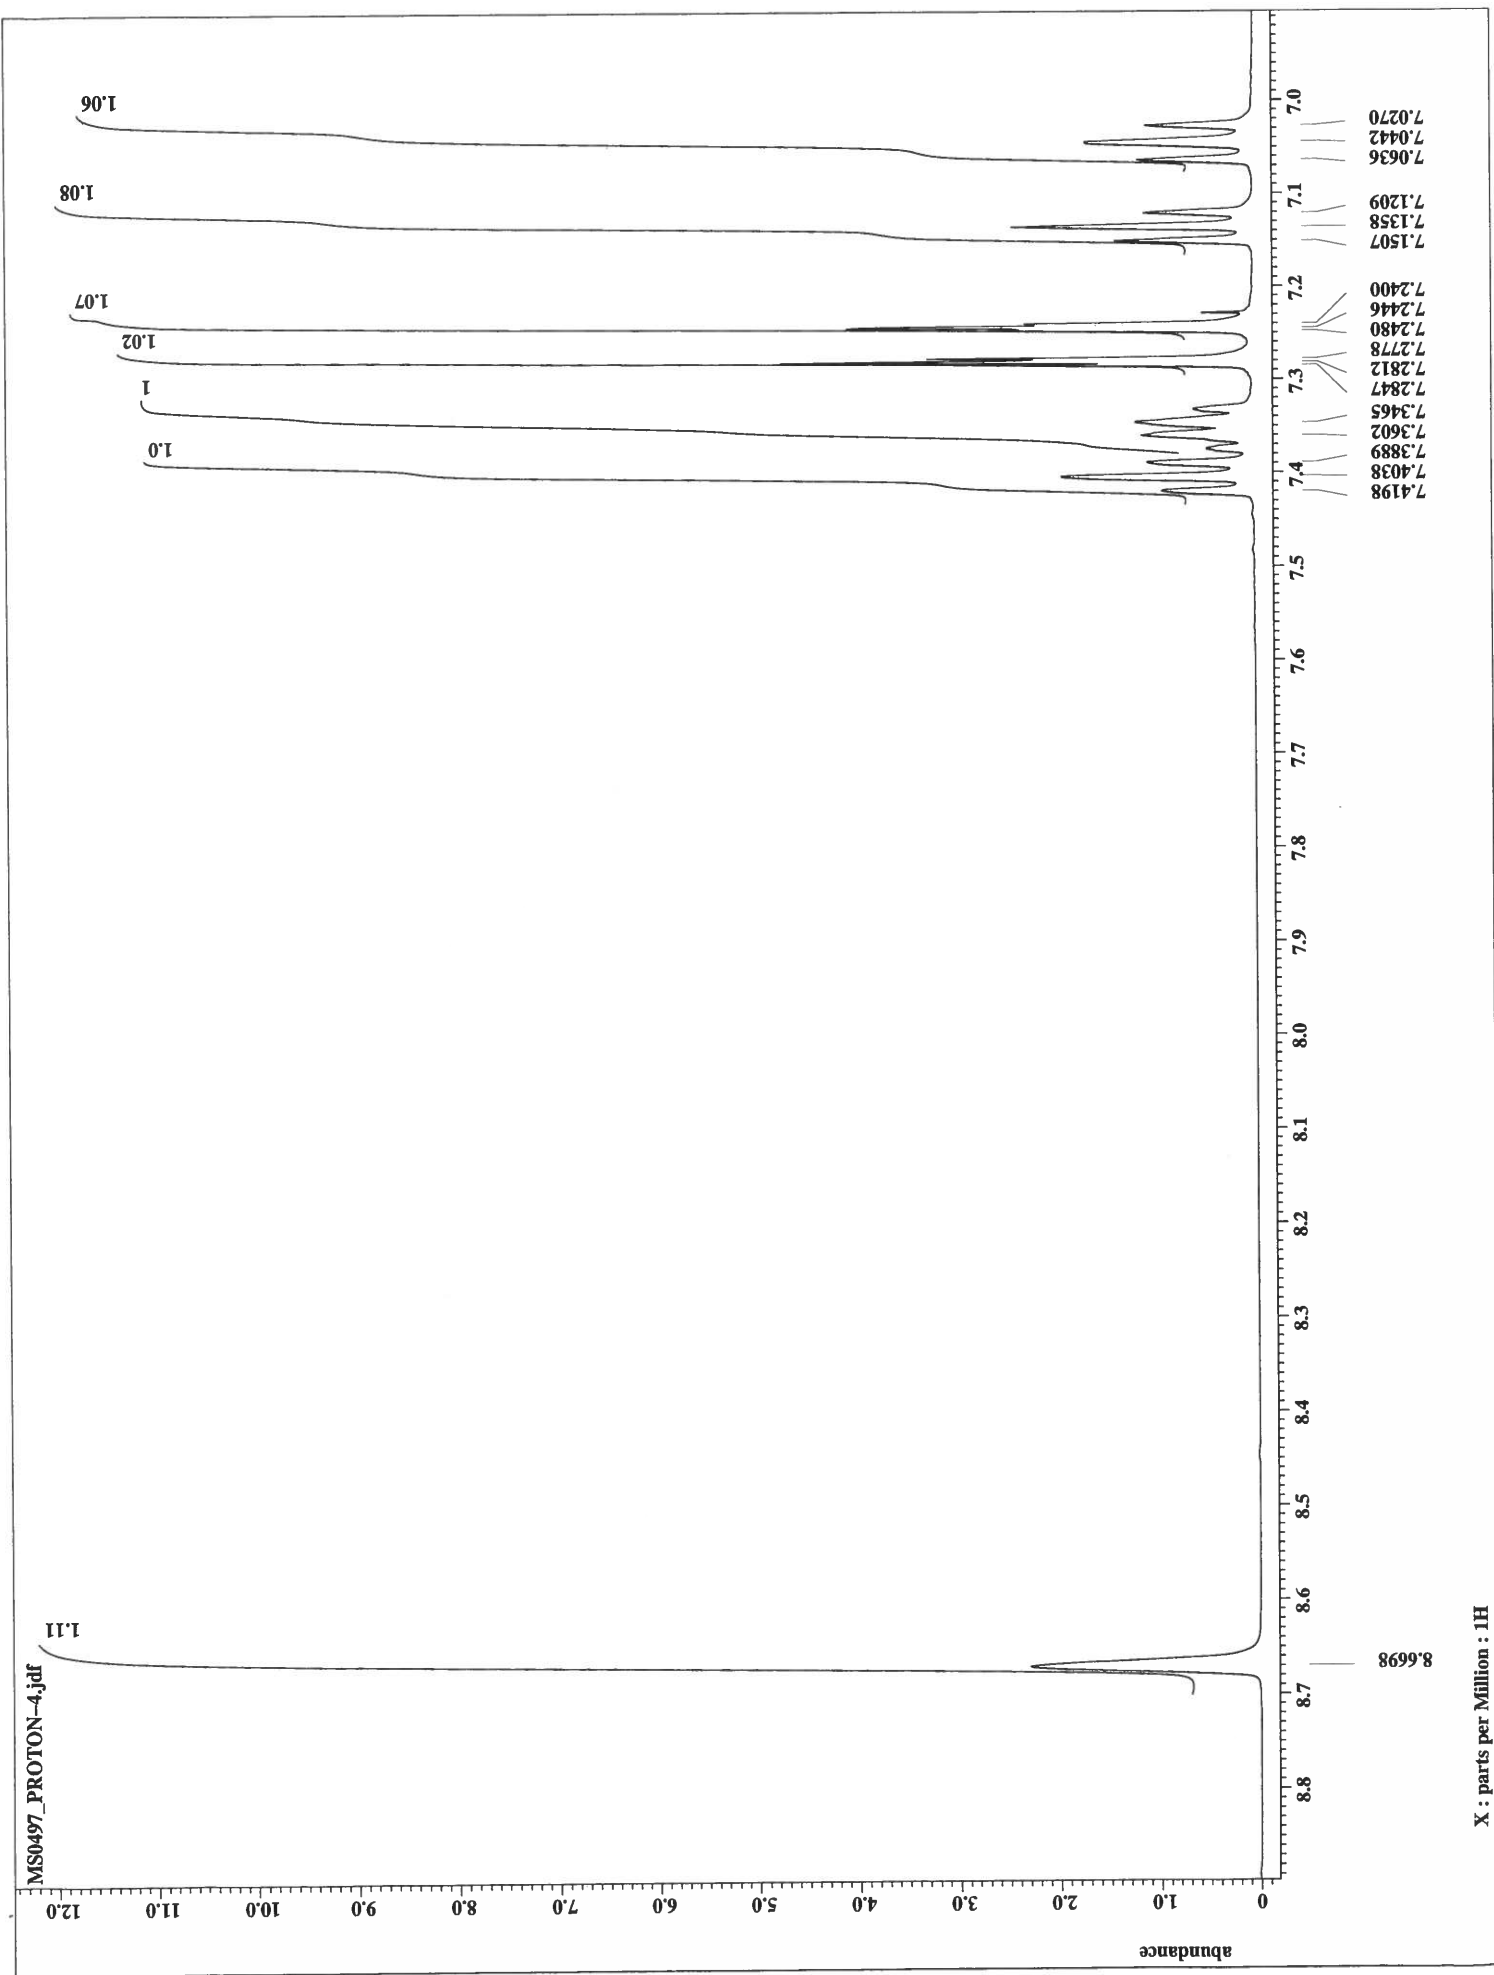

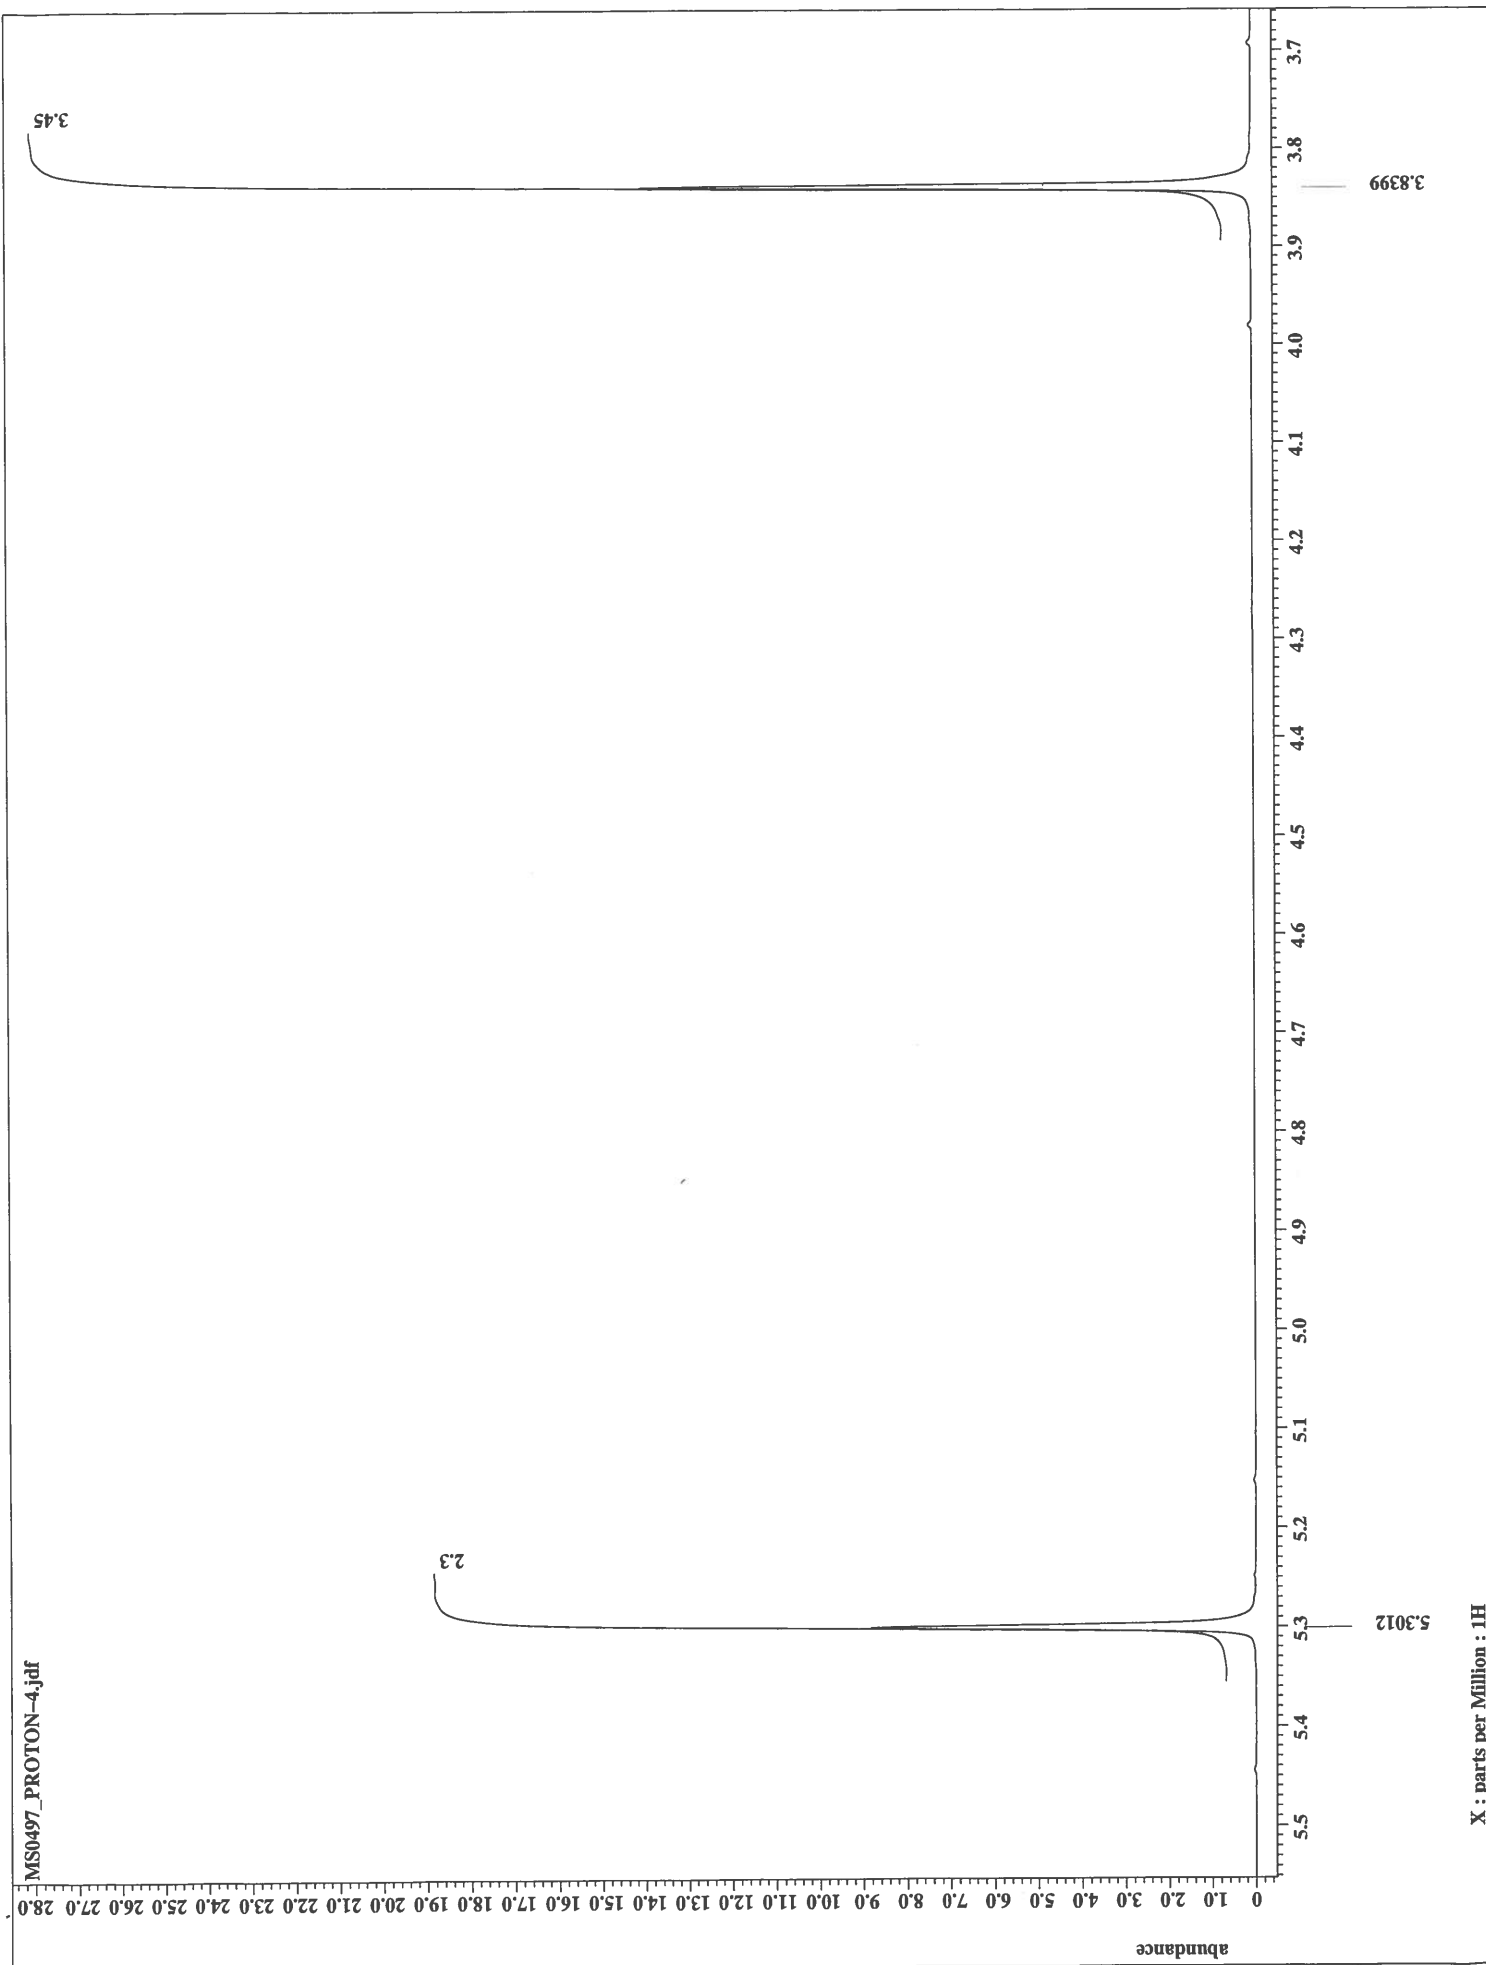

X : parts per Million : 1H

3.8399

5.3012

2.3

3.45

MS0497\_PROTON-4.jdf

abundance

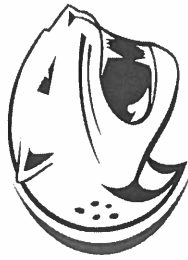

**SOUTH ALABAMA**  
**JAGUARS**

Filename = MS0497\_CARBON-2.jdf  
 Author = Jim Davis  
 Experiment = single\_pulse\_dec  
 Sample\_id = MS0497  
 Solvent = CHLOROFORM-D  
 Changer\_sample = 7  
 Creation\_time = 12-JUL-2018 18:13:54  
 Revision\_time = 12-JUL-2018 17:51:29  
 Current\_time = 12-JUL-2018 17:51:29  
 Data\_format = 1D COMPLEX  
 Dim\_size = 26214  
 Dim\_title = 13C  
 Dim\_units = [ppm]  
 Dimensions = X  
 Site = ECA 500  
 Spectrometer = UNM-ECA500  
 Field\_strength = 11.7473579[T] (500[MH  
 X\_acq\_duration = 0.83361792[s]  
 X\_domain = 13C  
 X\_freq = 125.76529768[MHz]  
 X\_offset = 100[ppm]  
 X\_points = 32768  
 X\_prescans = 4  
 X\_resolution = 1.19959034[Hz]  
 X\_sweep = 39.3081761[KHz]  
 Irr\_domain = 1H  
 Irr\_freq = 500.15991521[MHz]  
 Irr\_offset = 5.0[ppm]  
 Clipped = FALSE  
 Mod\_return = 1  
 Scans = 256  
 Total\_scans = 256  
 X\_90\_width = 13.2[us]  
 X\_acq\_time = 0.83361792[s]  
 X\_angle = 30[deg]  
 X\_atn = 6[db]  
 X\_pulse = 4.4[us]  
 Irr\_atn\_dec = 20.7[db]  
 Irr\_atn\_noe = 20.7[db]  
 Irr\_noise = WALTZ  
 Decoupling = TRUE  
 Initial\_wait = 1[s]  
 Noe\_time = TRUE  
 Noe = 2[s]  
 Recvr\_gain = 60  
 Relaxation\_delay = 2[s]  
 Repetition\_time = 2.83361792[s]  
 Temp\_get = 23.1[dc]

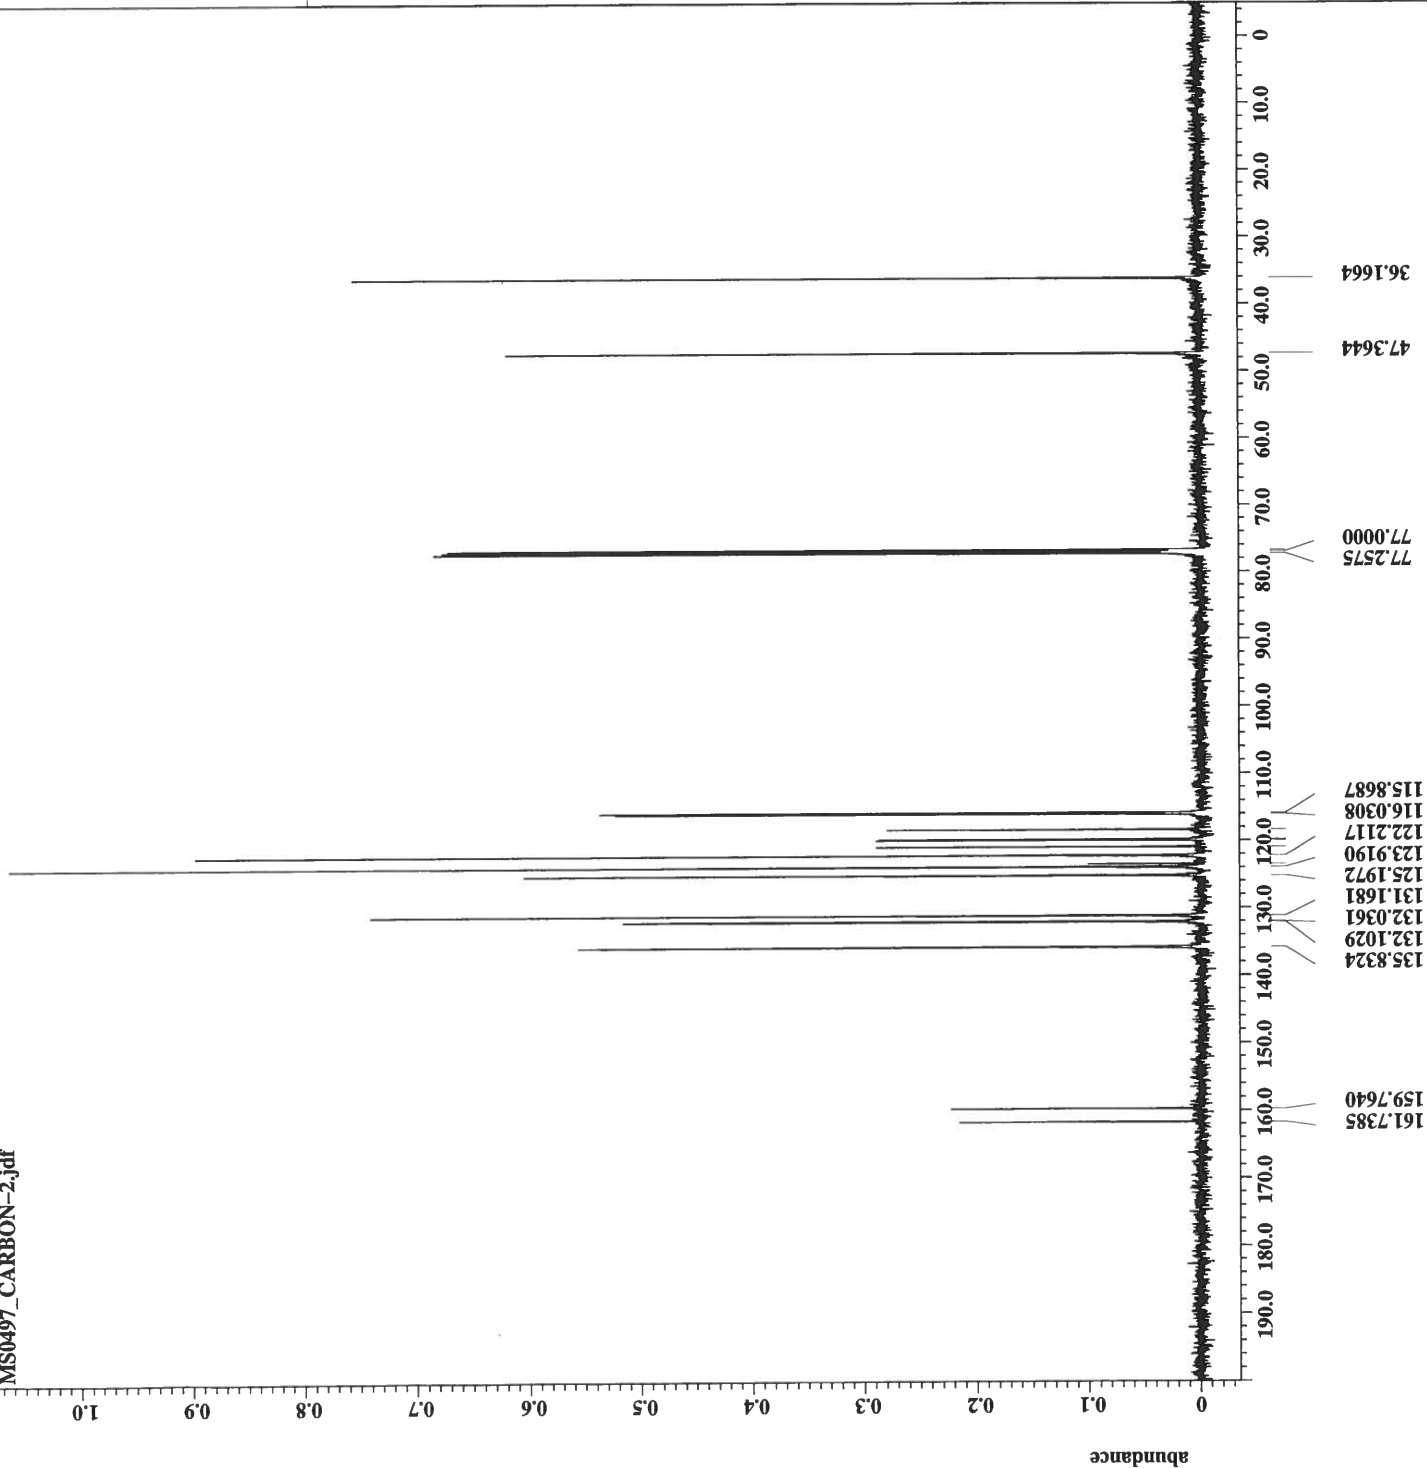

X : parts per Million : 13C

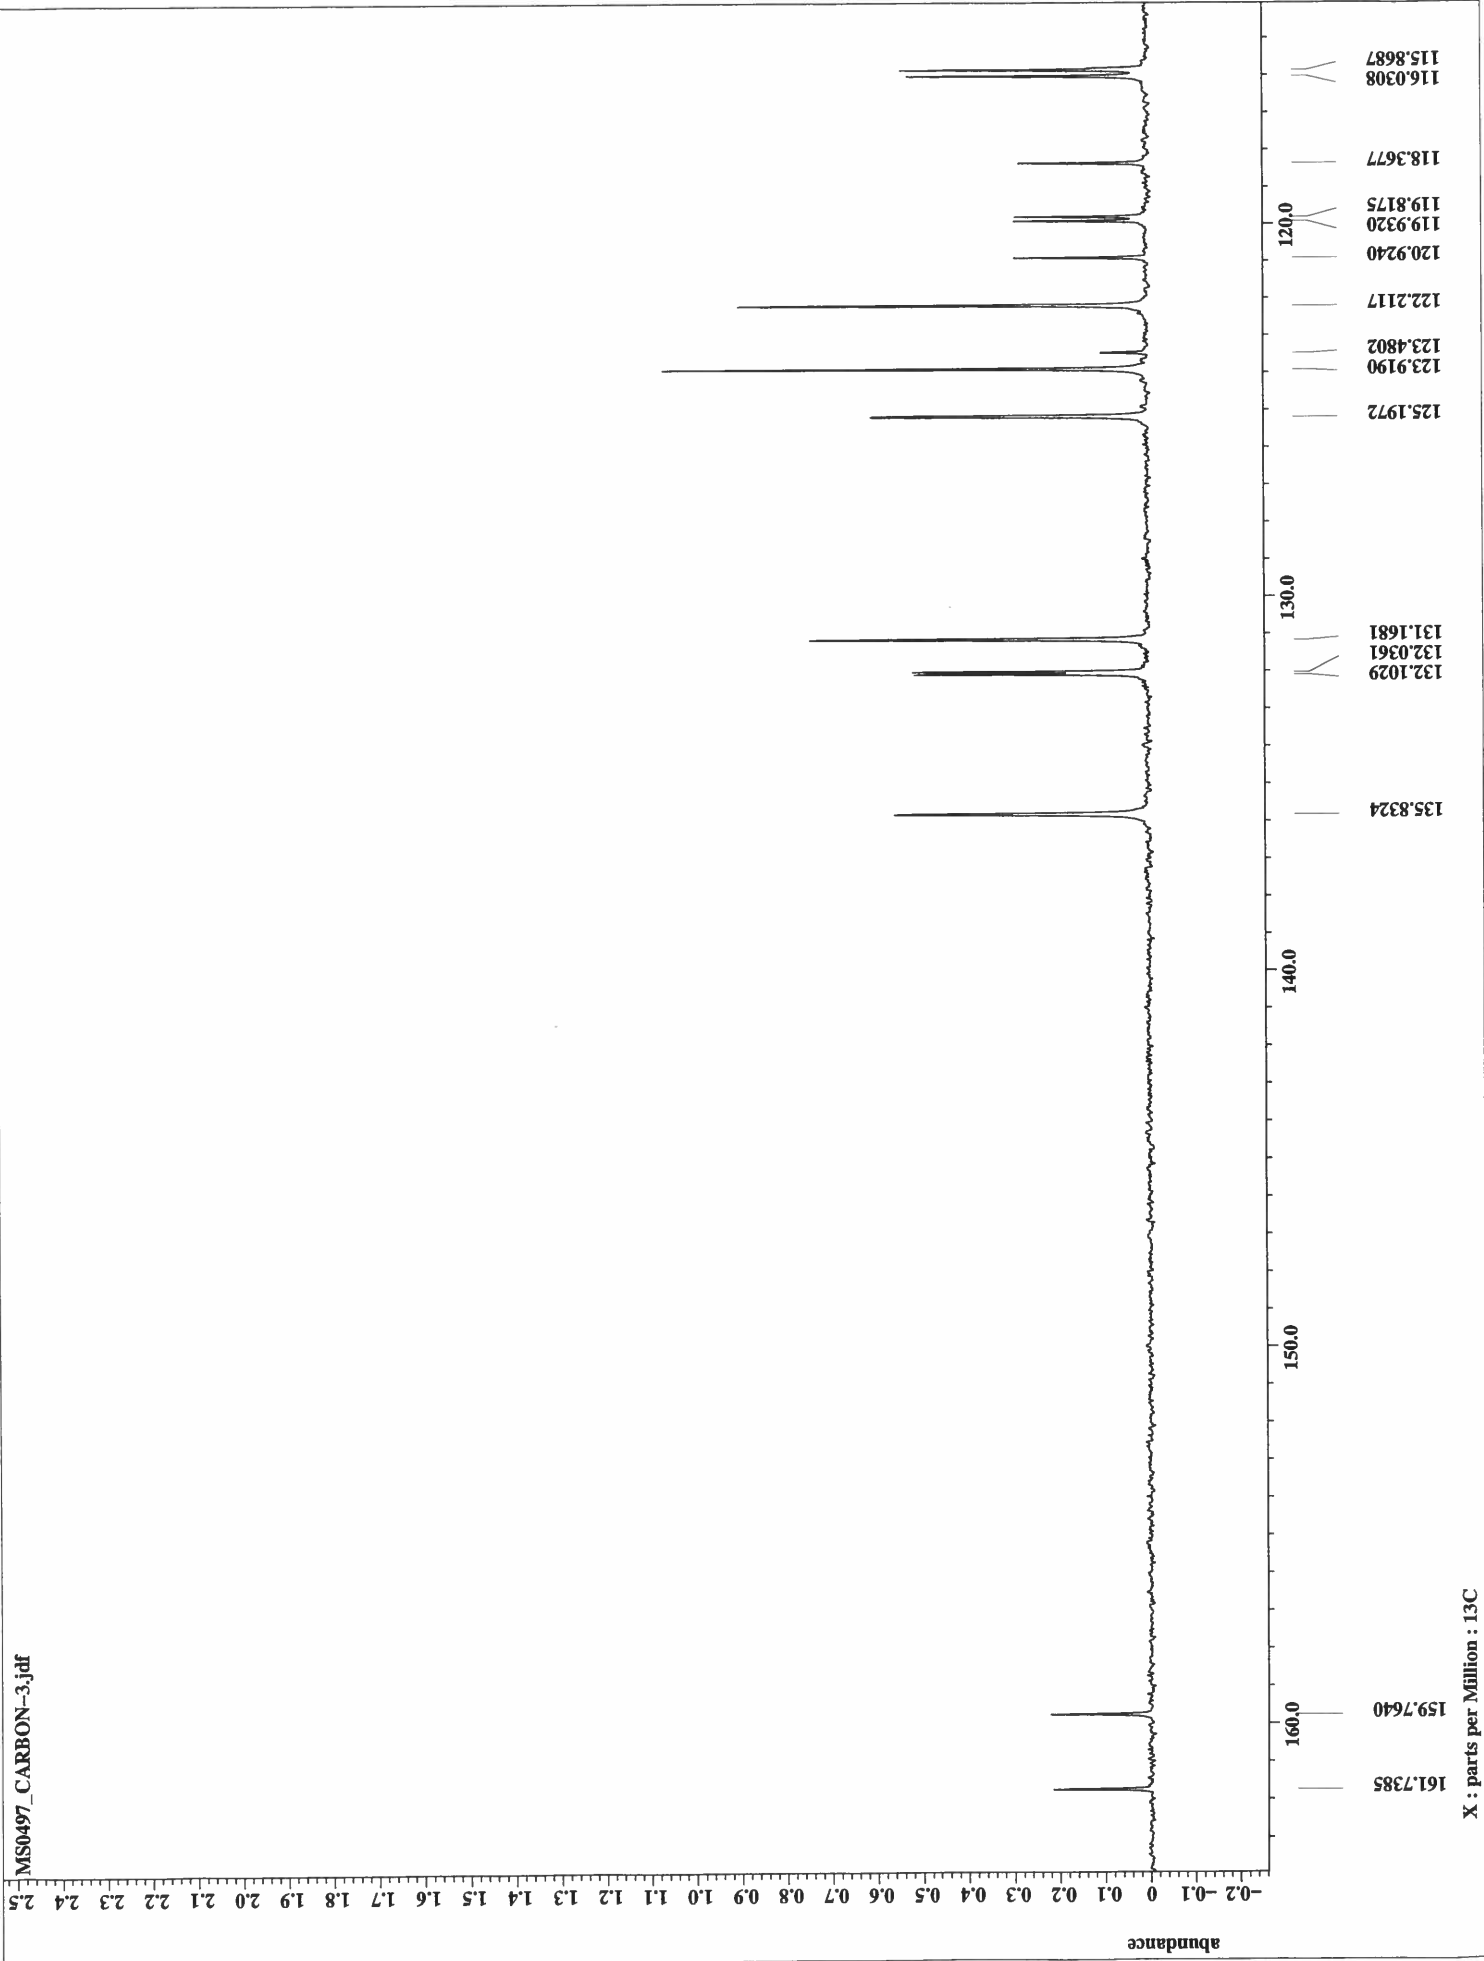

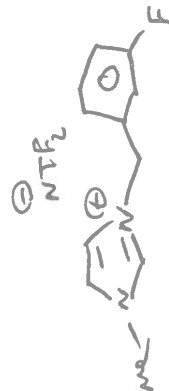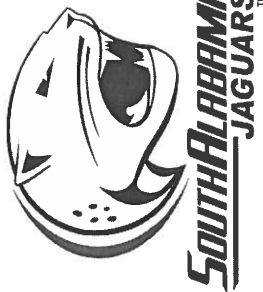

Filename = MS0497\_FLUORINE-2.jdf  
 Author = Jim Davis  
 Experiment = single\_pulse.ex2  
 Sample\_id = MS0497  
 Solvent = CHLOROFORM-D  
 Changer\_sample = 7  
 Creation\_time = 12-JUL-2018 16:25:02  
 Revision\_time = 12-JUL-2018 16:02:38  
 Current\_time = 12-JUL-2018 16:02:38  
 Data\_format = 1D COMPLEX  
 Dim\_size = 52428  
 Dim\_title = 19F  
 Dim\_units = [ppm]  
 Dimensions = X  
 Site = ECA 500  
 Spectrometer = JNM-ECA500  
 Field\_strength = 11.7473579 [T] (500 [MH  
 X\_acq\_duration = 0.55574528 [s]  
 X\_domain = 19F  
 X\_freq = 470.62046084 [MHz]  
 X\_offset = -70 [ppm]  
 X\_points = 65536  
 X\_prescans = 1  
 X\_resolution = 1.7993855 [Hz]  
 X\_sweep = 117.9245283 [kHz]  
 Irr\_domain = 19F  
 Irr\_freq = 470.62046084 [MHz]  
 Irr\_offset = 5 [ppm]  
 Tri\_domain = 19F  
 Tri\_freq = 470.62046084 [MHz]  
 Tri\_offset = 5 [ppm]  
 Clipped = FALSE  
 Mod\_return = 1  
 Scans = 16  
 Total\_scans = 16  
 X\_90\_width = 13.1 [us]  
 X\_acq\_time = 0.55574528 [s]  
 X\_angle = 45 [deg]  
 X\_atn = 2.5 [dB]  
 X\_pulse = 6.55 [us]  
 Irr\_mode = Off  
 Tri\_mode = Off  
 Dante\_presat = FALSE  
 Initial\_wait = 1 [s]  
 Recvr\_gain = 30  
 Relaxation\_delay = 4 [s]  
 Repetition\_time = 4.55574528 [s]  
 Temp\_get = 22.4 [dC]

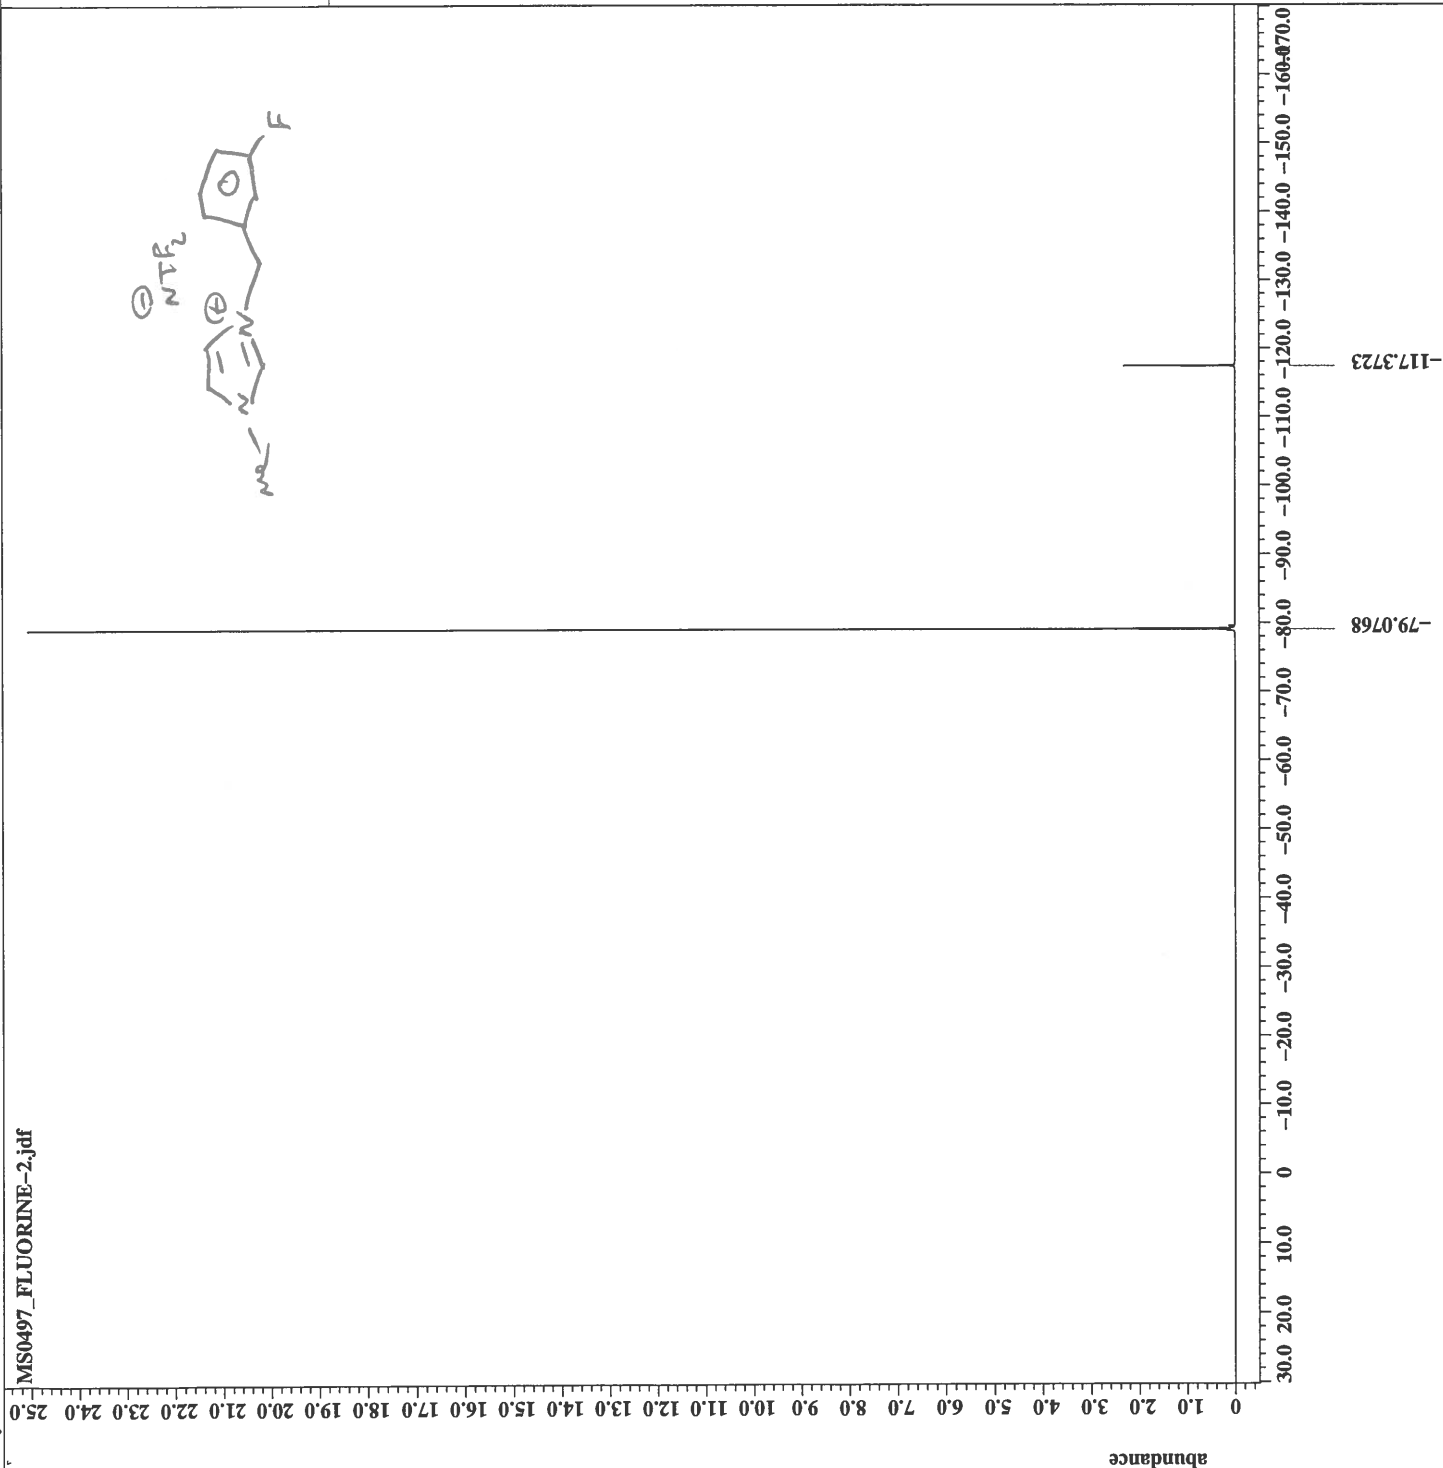

90.77

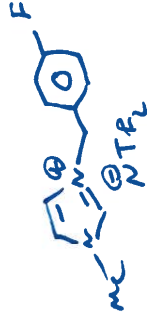

Filename = MS0498\_PROTON-5.jdf  
 Author = Jim Davis  
 Experiment = single\_pulse.ex2  
 Sample\_id = MS0498  
 Solvent = ACETONE-D6  
 Changer\_sample = 8  
 Creation\_time = 13-JUL-2018 09:18:13  
 Revision\_time = 13-JUL-2018 08:55:45  
 Current\_time = 13-JUL-2018 08:55:45  
 Data\_format = 1D COMPLEX  
 Dim\_size = 13107  
 Dim\_title = 1H  
 Dim\_units = [ppm]  
 Dimensions = X  
 Site = ECA 500  
 Spectrometer = JNM-ECA500  
 Field\_strength = 11.7473579 [T] (500 [MH  
 X\_acq\_duration = 1.74587904 [s]  
 X\_domain = 1H  
 X\_freq = 500.15991521 [MHz]  
 X\_offset = 5.0 [ppm]  
 X\_points = 16384  
 X\_prescans = 1  
 X\_resolution = 0.57277737 [Hz]  
 X\_sweep = 9.38438438 [kHz]  
 Irr\_domain = 1H  
 Irr\_freq = 500.15991521 [MHz]  
 Irr\_offset = 5.0 [ppm]  
 Tri\_domain = 1H  
 Tri\_freq = 500.15991521 [MHz]  
 Tri\_offset = 5.0 [ppm]  
 Clipped = FALSE  
 Mod\_return = 1  
 Scans = 16  
 Total\_scans = 16  
 X\_90\_width = 12.4 [us]  
 X\_acq\_time = 1.74587904 [s]  
 X\_angle = 45 [deg]  
 X\_atn = 4 [dB]  
 X\_pulse = 6.2 [us]  
 Irr\_mode = Off  
 Tri\_mode = Off  
 Dante\_preset = FALSE  
 Initial\_wait = 1 [s]  
 Recvr\_gain = 34  
 Relaxation\_delay = 4 [s]  
 Repetition\_time = 5.74587904 [s]  
 Temp\_get = 22.5 [dC]

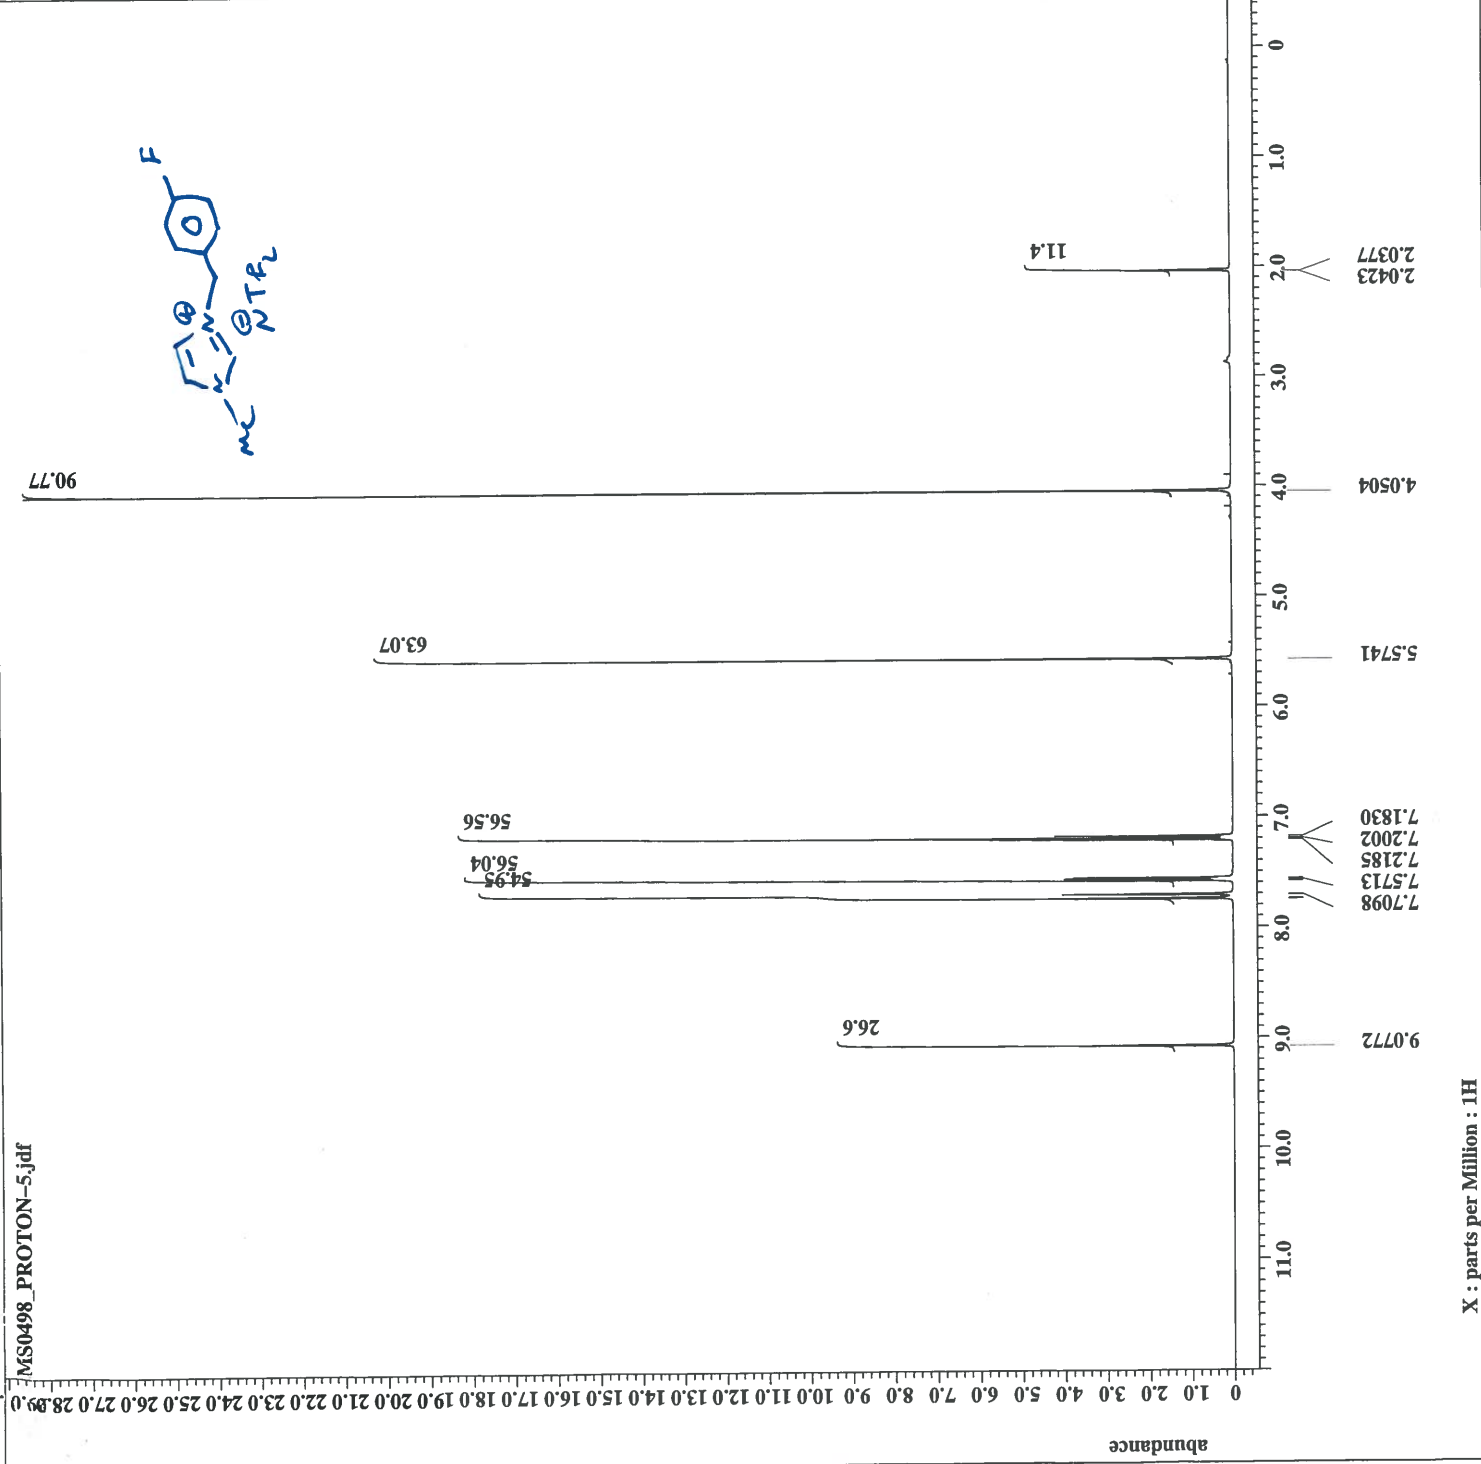

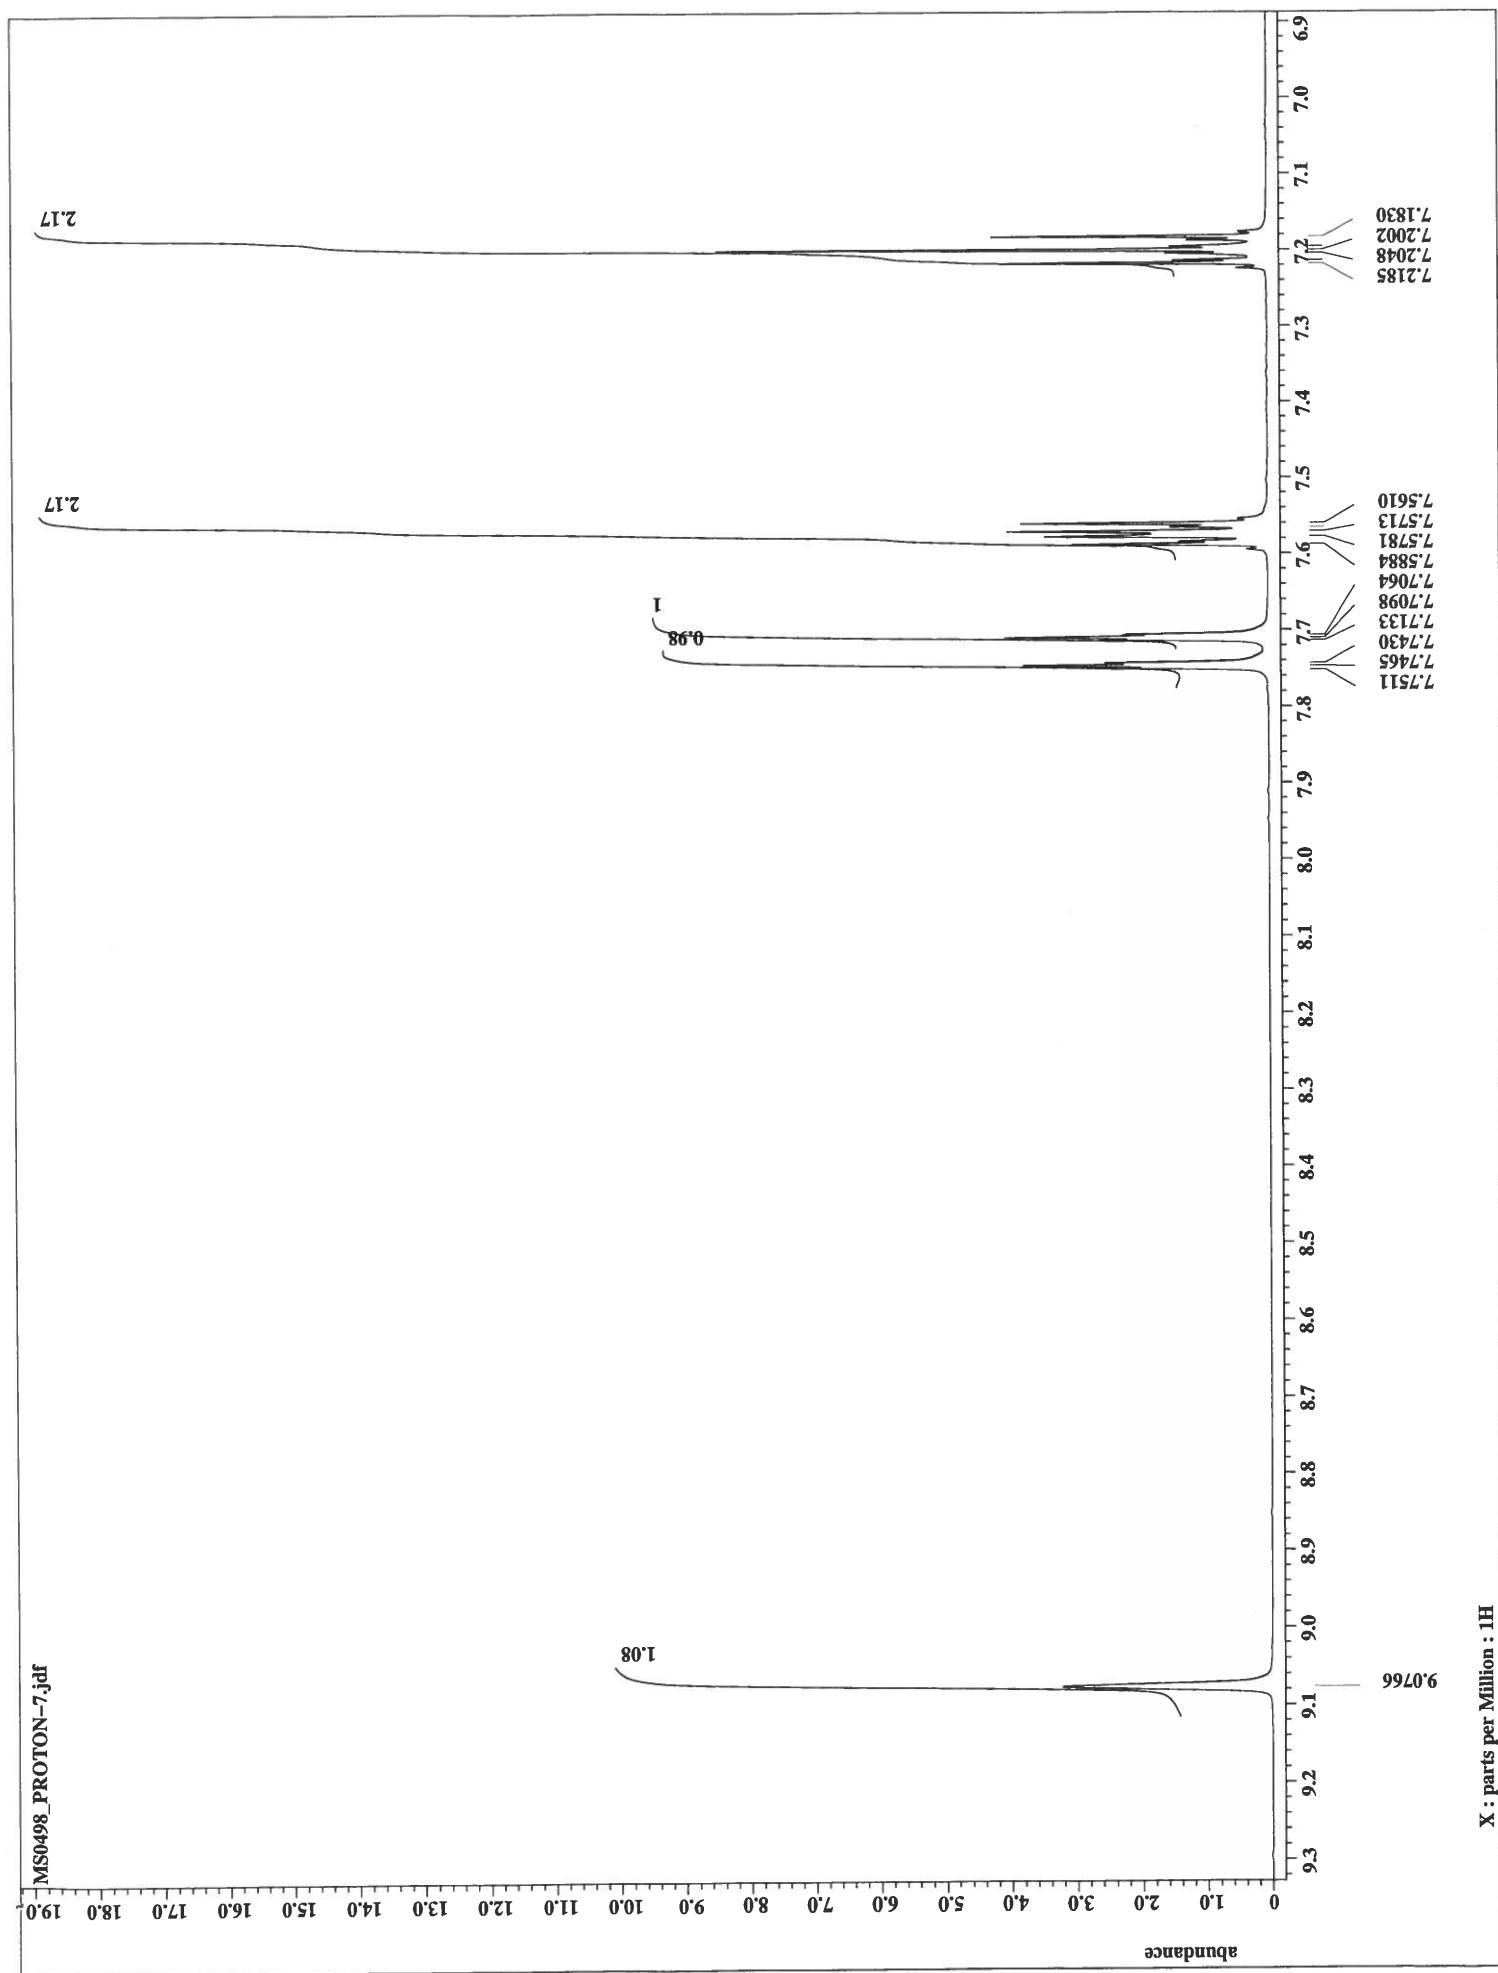



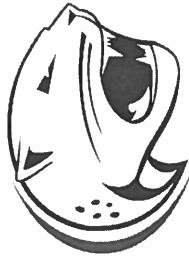**SOUTH ALABAMA**  
**JAGUARS**

Filename = MS0498\_CARBON-2.jdf  
Author = Jim Davis  
Experiment = single\_pulse\_dec  
Sample\_id = MS0498  
Solvent = CHLOROFORM-D  
Charger\_sample = 8  
Creation\_time = 12-JUL-2018 17:31:59  
Revision\_time = 12-JUL-2018 17:09:35  
Current\_time = 12-JUL-2018 17:09:35  
Data\_format = 1D COMPLEX  
Dim\_size = 26214  
Dim\_title = 13C  
Dim\_units = [ppm]  
Dimensions = X  
Site = ECA 500  
Spectrometer = JNM-ECA500  
Field\_strength = 11.7473579[T] (500[MH  
X\_acq\_duration = 0.83361792[s]  
X\_domain = 13C  
X\_freq = 125.76529768[MHz]  
X\_offset = 100[ppm]  
X\_points = 32768  
X\_prescans = 4  
X\_resolution = 1.19959034[Hz]  
X\_sweep = 39.3081761[kHz]  
Irr\_domain = 1H  
Irr\_freq = 500.15991521[MHz]  
Irr\_offset = 5.0[ppm]  
Clipped = FALSE  
Mod\_return = 1  
Scans = 128  
Total\_scans = 128  
X\_90\_width = 13.2[us]  
X\_acq\_time = 0.83361792[s]  
X\_angle = 30[deg]  
X\_atn = 6[db]  
X\_pulse = 4.4[us]  
Irr\_atn\_dec = 20.7[db]  
Irr\_atn\_noe = 20.7[db]  
Irr\_noise = WALTZ  
Decoupling = TRUE  
Initial\_wait = 1[s]  
Noe = TRUE  
Noe\_time = 2[s]  
Recvr\_gain = 60  
Relaxation\_delay = 2[s]  
Repetition\_time = 2.83361792[s]  
Temp\_get = 23[dc]

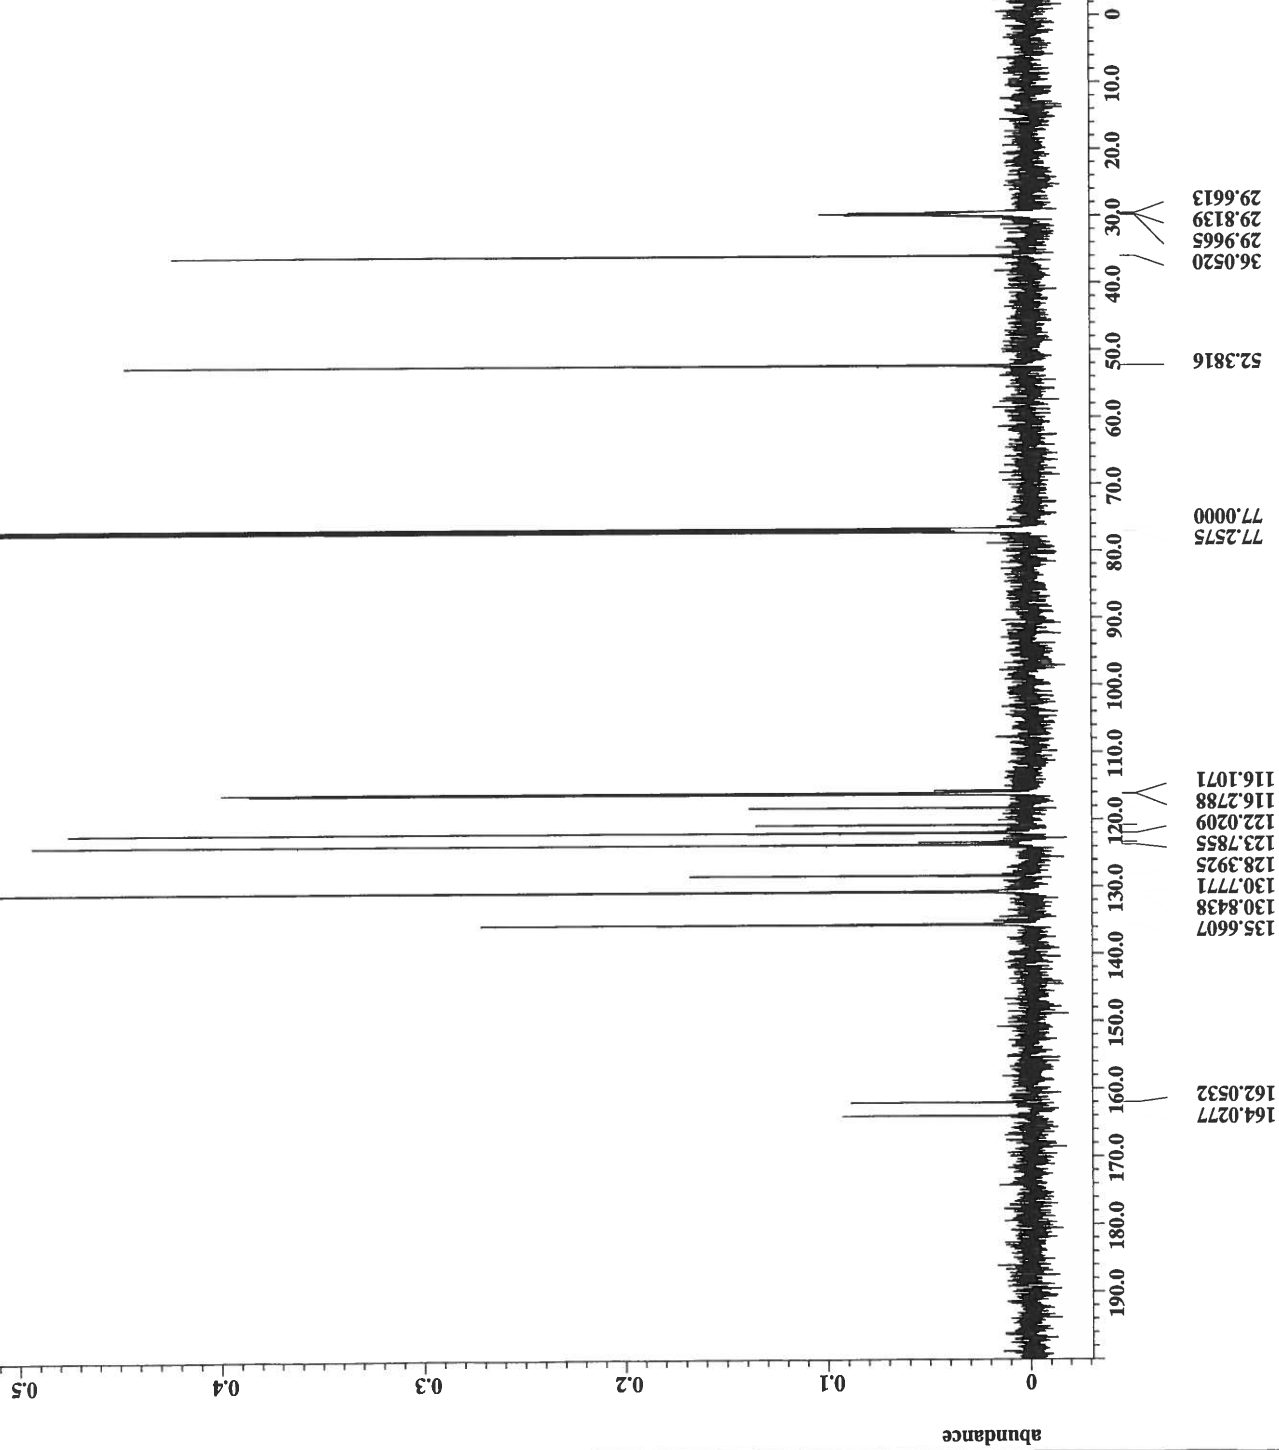

X : parts per Million : 13C

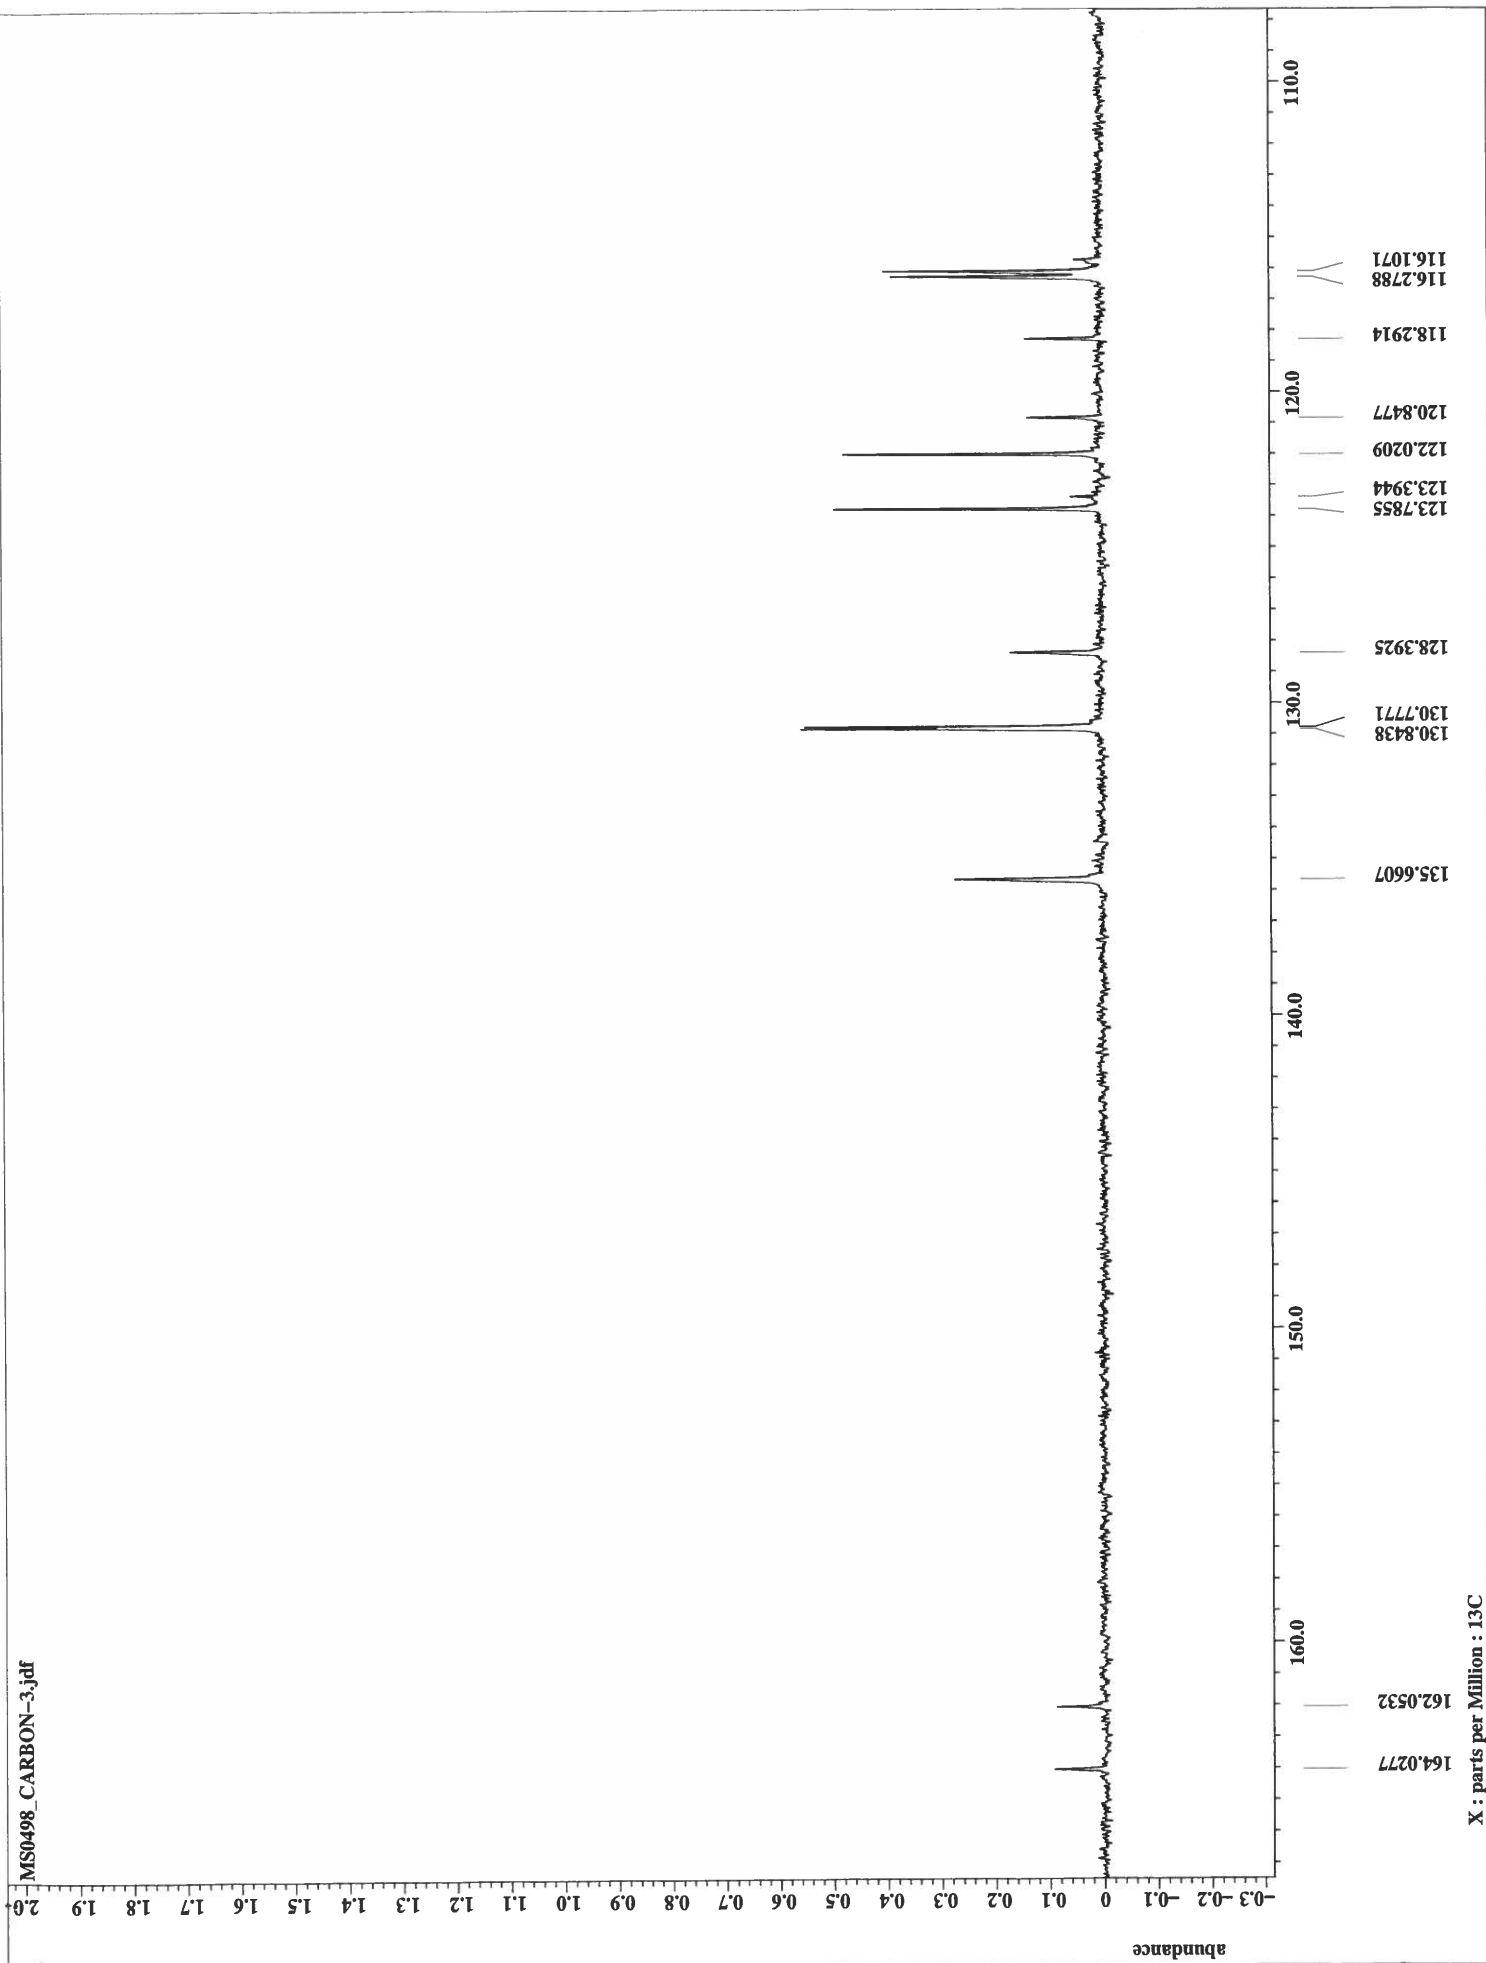

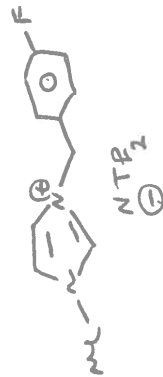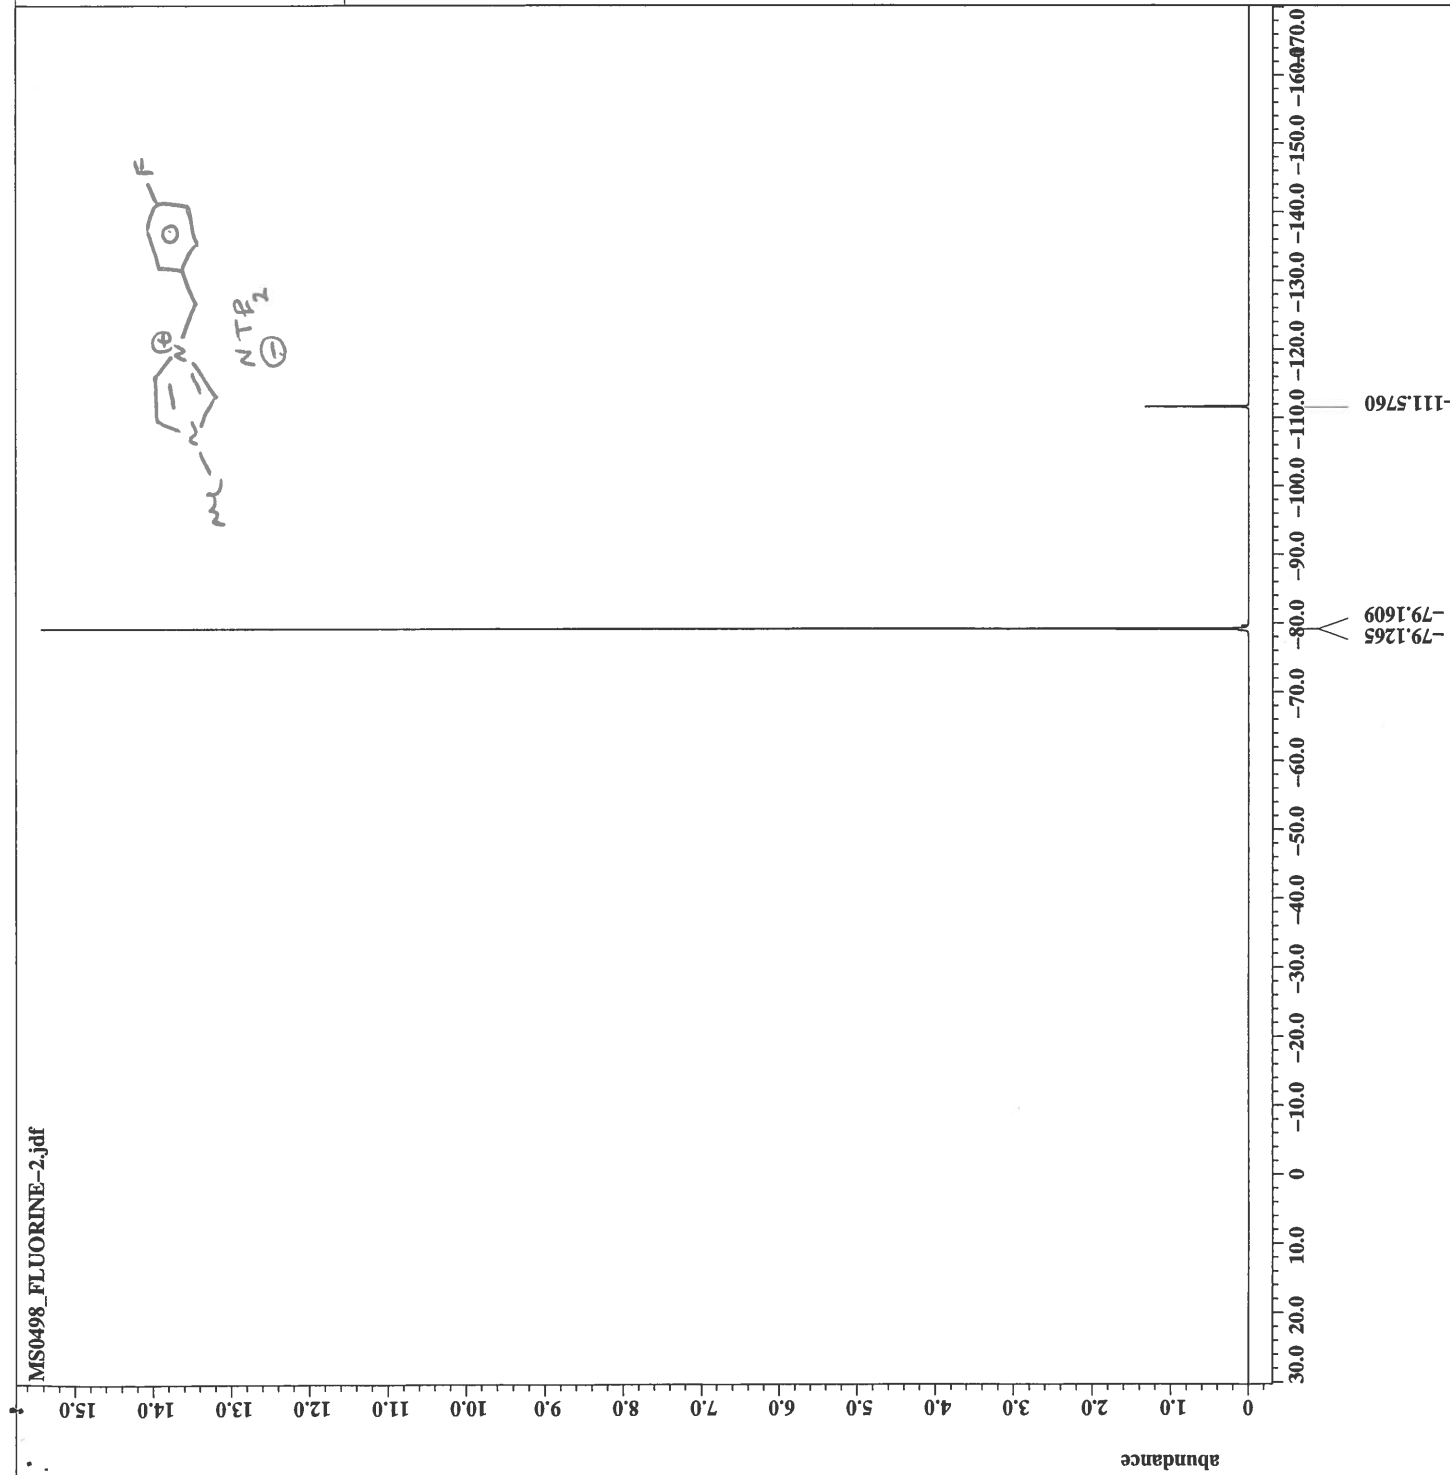

X : parts per Million : 19F

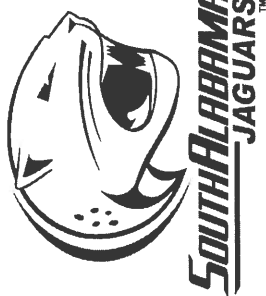

```

Filename = MS0498_FLUORINE-2.jdf
Author = Jim Davis
Experiment = single_pulse.ex2
Sample_id = MS0498
Solvent = CHLOROFORM-D
Changer_sample = 8
Creation_time = 12-JUL-2018 16:31:45
Revision_time = 12-JUL-2018 16:09:22
Current_time = 12-JUL-2018 16:09:23

Data_format = 1D COMPLEX
Dim_size = 52428
Dim_title = 19F
Dim_units = [ppm]
Dimensions = X
Site = ECA 500
Spectrometer = JNM-ECA500

Field_strength = 11.7473579[T] (500[MH
X_acq_duration = 0.55574528[s]
X_domain = 19F
X_freq = 470.62046084[MHz]
X_offset = -70[ppm]
X_points = 65536
X_prescans = 1
X_resolution = 1.7993855[Hz]
X_sweep = 117.9245283[kHz]
Irr_domain = 19F
Irr_freq = 470.62046084[MHz]
Irr_offset = 5[ppm]
Tri_domain = 19F
Tri_freq = 470.62046084[MHz]
Tri_offset = 5[ppm]
Clipped = FALSE
Mod_return = 1
Scans = 16
Total_scans = 16

X_90_width = 13.1[us]
X_acq_time = 0.55574528[s]
X_angle = 45[deg]
X_atn = 2.5[dB]
X_pulse = 6.55[us]
Irr_mode = Off
Tri_mode = Off
Dante_preset = FALSE
Initial_wait = 1[s]
Recvr_gain = 36
Relaxation_delay = 4[s]
Repetition_time = 4.55574528[s]
Temp_get = 22.4[dc]

```

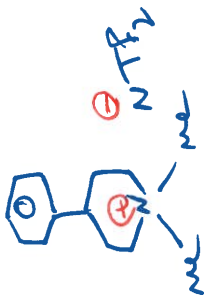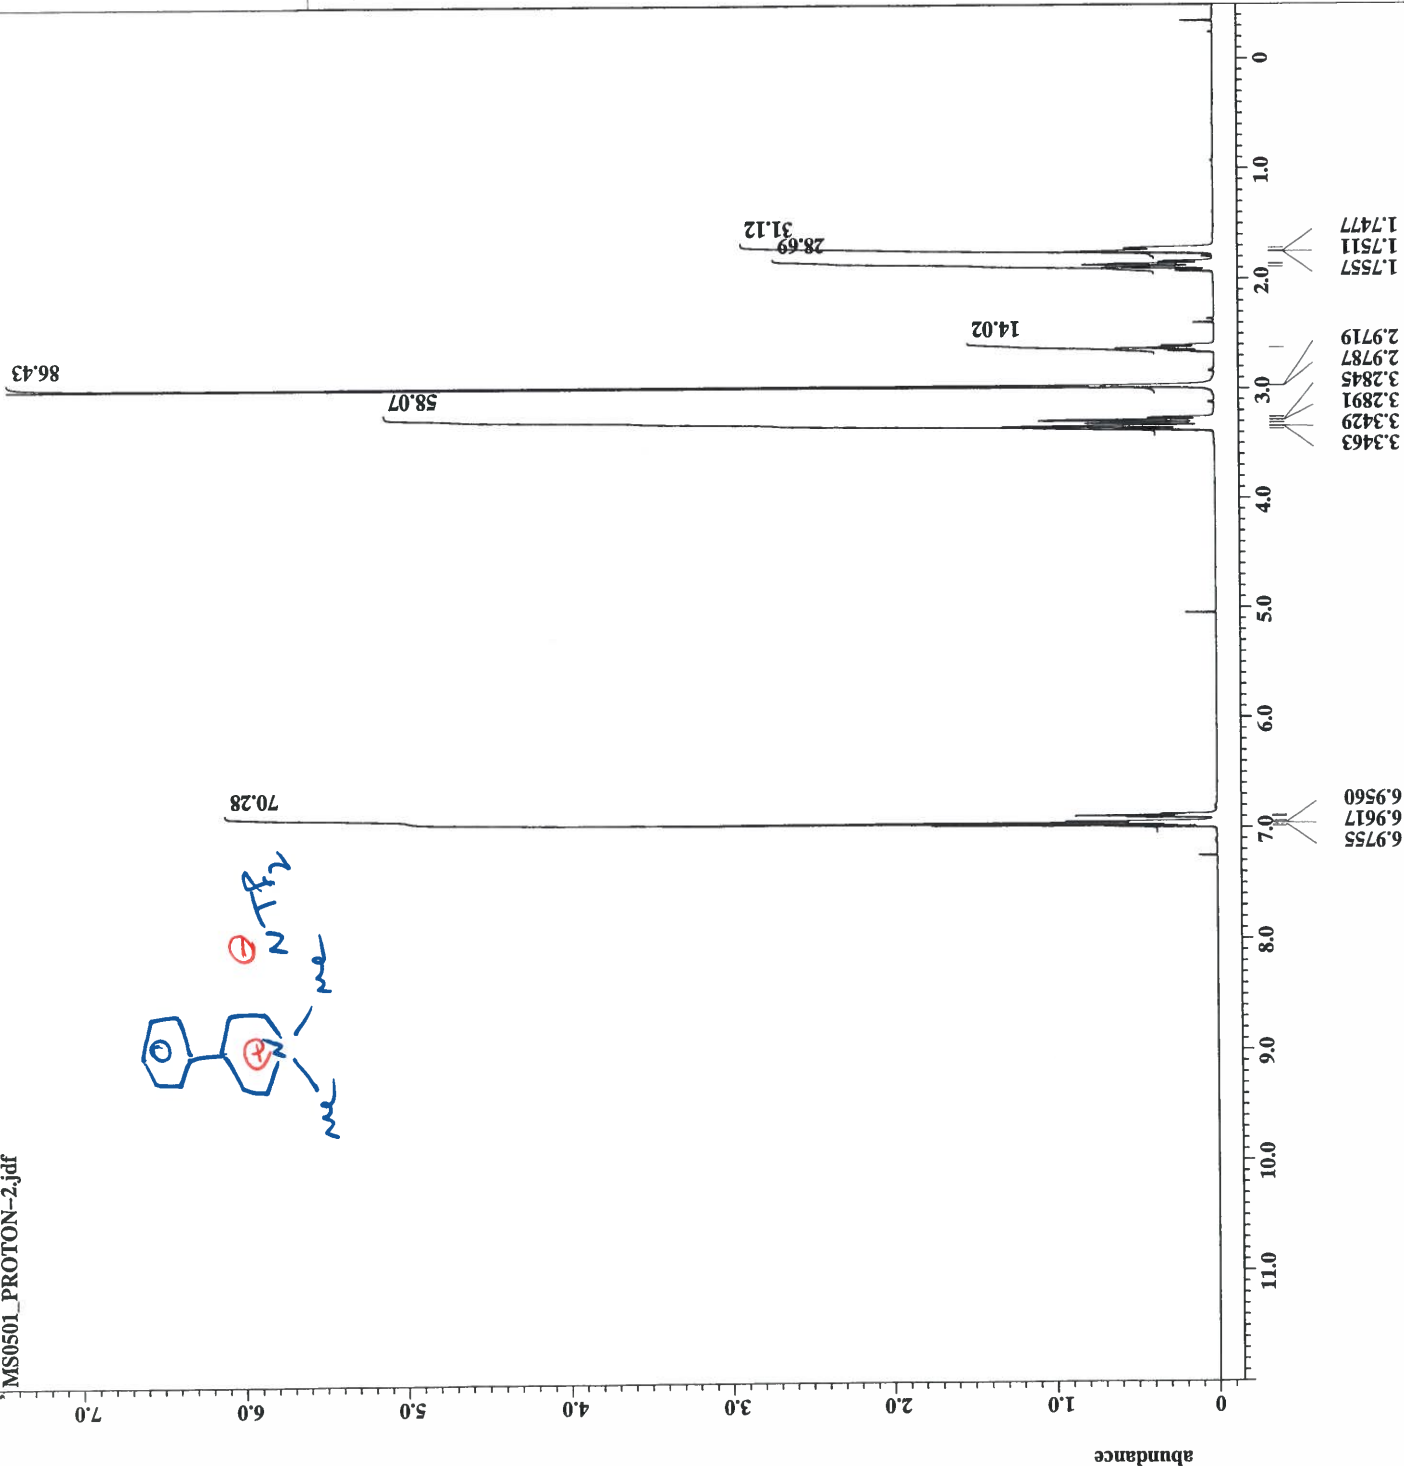

**X : parts per Million : 1H**

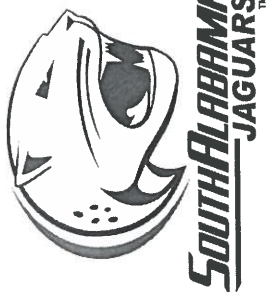

|                  |   |                       |
|------------------|---|-----------------------|
| Filename         | = | MS0501_PROTON-2.jdf   |
| Author           | = | Jim Davis             |
| Experiment       | = | single_pulse.ex2      |
| Sample_id        | = | MS0501                |
| Solvent          | = | CHLOROFORM-D          |
| Changer_sample   | = | 11                    |
| Creation_time    | = | 5-JUL-2018 16:43:37   |
| Revision_time    | = | 5-JUL-2018 16:20:08   |
| Current_time     | = | 5-JUL-2018 16:20:08   |
| Data_format      | = | 1D COMPLEX            |
| Dim_size         | = | 13107                 |
| Dim_title        | = | 1H                    |
| Dim_units        | = | [ppm]                 |
| Dimensions       | = | x                     |
| Site             | = | ECA 500               |
| Spectrometer     | = | JNM-ECA500            |
| Field_strength   | = | 11.7473579[M] (500[MH |
| X_acq_duration   | = | 1.74587904[s]         |
| X_domain         | = | 1H                    |
| X_freq           | = | 500.15991521[MHz]     |
| X_offset         | = | 5.0[ppm]              |
| X_points         | = | 16384                 |
| X_prescans       | = | 1                     |
| X_resolution     | = | 0.57277737[kHz]       |
| X_sweep          | = | 9.38438438[kHz]       |
| Irr_domain       | = | 1H                    |
| Irr_freq         | = | 500.15991521[MHz]     |
| Irr_offset       | = | 5.0[ppm]              |
| Tri_domain       | = | 1H                    |
| Tri_freq         | = | 500.15991521[MHz]     |
| Tri_offset       | = | 5.0[ppm]              |
| Clipped          | = | FALSE                 |
| Mod_return       | = | 1                     |
| Scans            | = | 16                    |
| Total_scans      | = | 16                    |
| X_90_width       | = | 12.4[us]              |
| X_acq_time       | = | 1.74587904[s]         |
| X_angle          | = | 45[deg]               |
| X_atn            | = | 4[dB]                 |
| X_pulse          | = | 6.2[us]               |
| Irr_mode         | = | Off                   |
| Tri_mode         | = | Off                   |
| Dante_preset     | = | FALSE                 |
| Initial_wait     | = | 1[s]                  |
| Recvr_gain       | = | 30                    |
| Relaxation_delay | = | 4[s]                  |
| Repetition_time  | = | 5.74587904[s]         |
| Temp_set         | = | 22.7[deg]             |

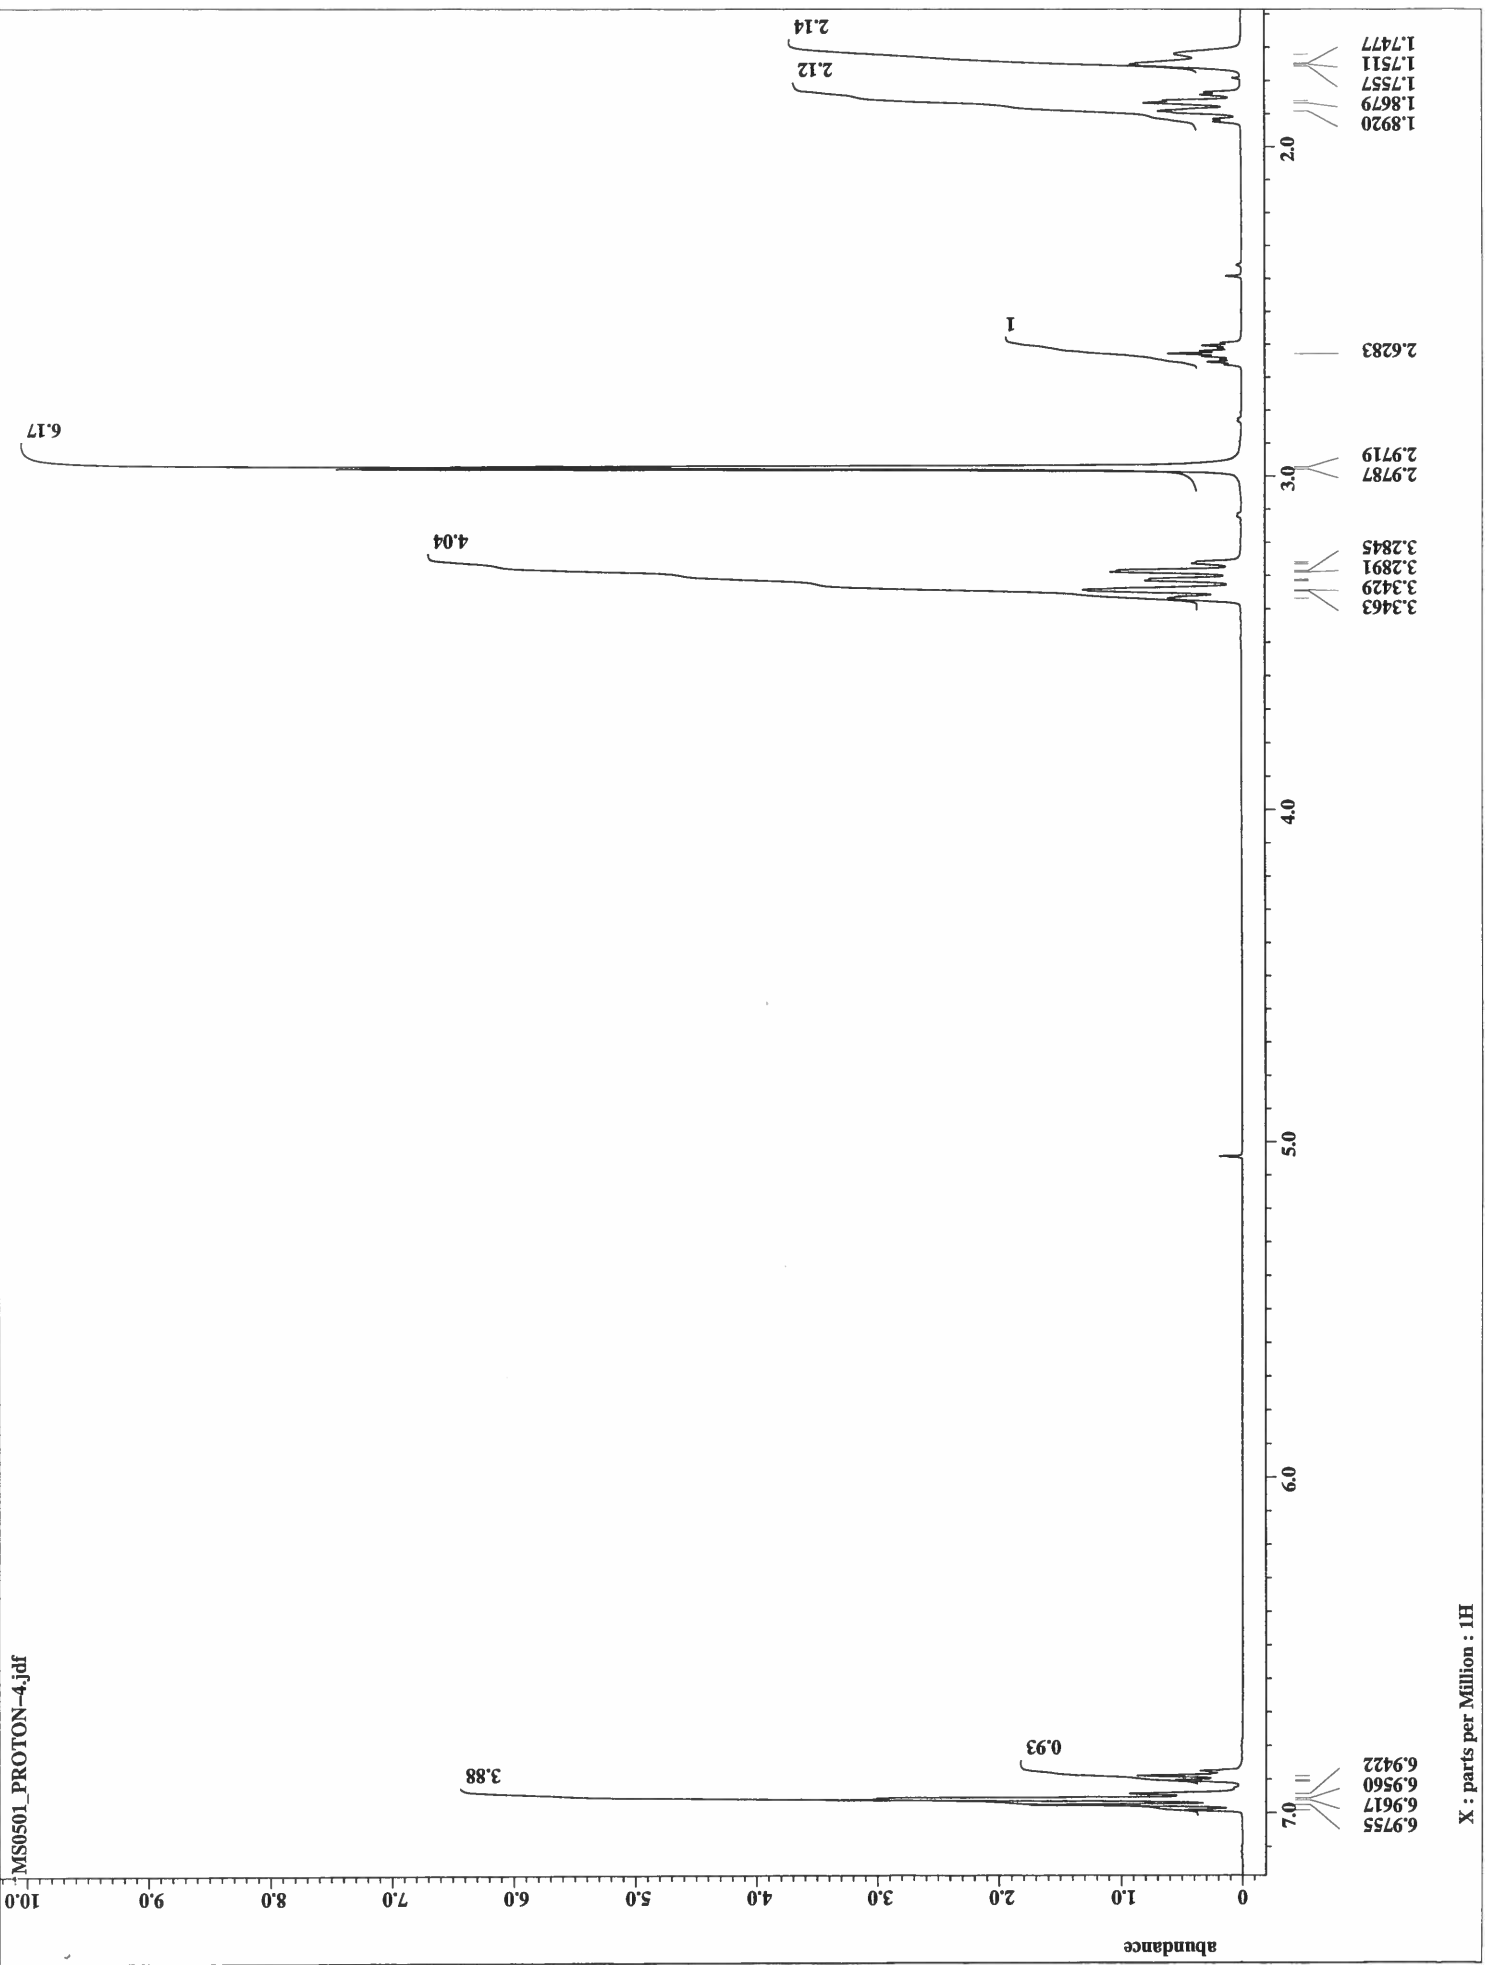

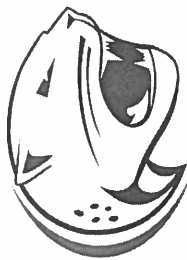

**SOUTH ALABAMA**  
**JAGUARS**

```

Filename      = MS0501_CARBON-2.jdf
Author       = Jim Davis
Experiment   = single_pulse_dec
Sample_id    = MS0501
Solvent      = CHLOROFORM-D
Changer_sample  = 11
Creation_time  = 5-JUL-2018 16:57:55
Revision_time  = 5-JUL-2018 16:34:26
Current_time   = 5-JUL-2018 16:34:26

Data_format   = 1D COMPLEX
Dim_size      = 26214
Dim_title     = 13C
Dim_units     = [ppm]
Dimensions    = X
Site          = ECA 500
Spectrometer  = JNM-ECA500

Field_strength = 11.7473579[T] (500[MH
X_acq_duration = 0.83361792[s]
X_domain       = 13C
X_freq         = 125.76529768[MHz]
X_offset       = 100[ppm]
X_points       = 32768
X_prescans     = 4
X_resolution   = 1.19959034[Hz]
X_sweep        = 39.3081761[KHz]
Irr_domain     = 1H
Irr_freq       = 500.15991521[MHz]
Irr_offset     = 5.0[ppm]
Clipped        = FALSE
Mod_return     = 1
Scans          = 256
Total_scans    = 256

X_90_width     = 13.2[us]
X_acq_time     = 0.83361792[s]
X_angle        = 30[deg]
X_atn          = 6[db]
X_pulse        = 4.4[us]
Irr_atn_dec    = 20.7[db]
Irr_atn_noe    = 20.7[db]
Irr_noise      = WALTZ
Decoupling     = TRUE
Initial_wait   = 1[s]
Noe            = TRUE
Noe_time       = 2[s]
Recvr_gain     = 60
Relaxation_delay = 2[s]
Repetition_time = 2.83361792[s]
Temp_get       = 23.2[dc]
  
```

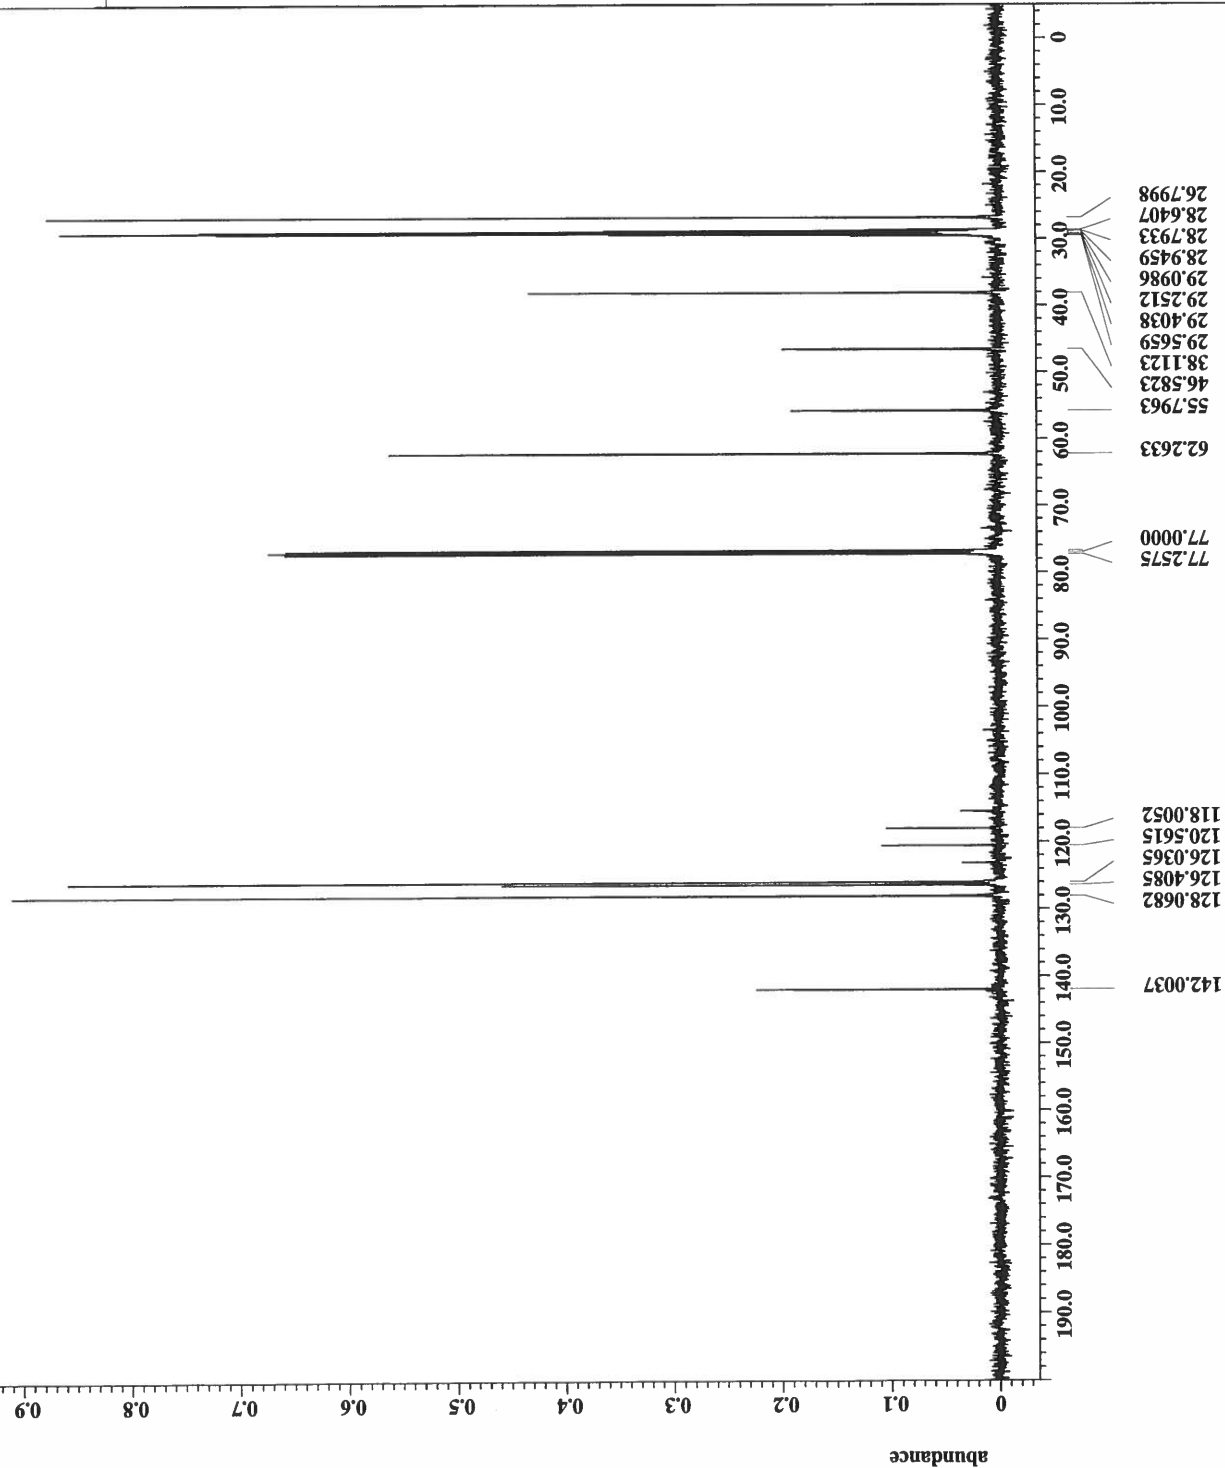

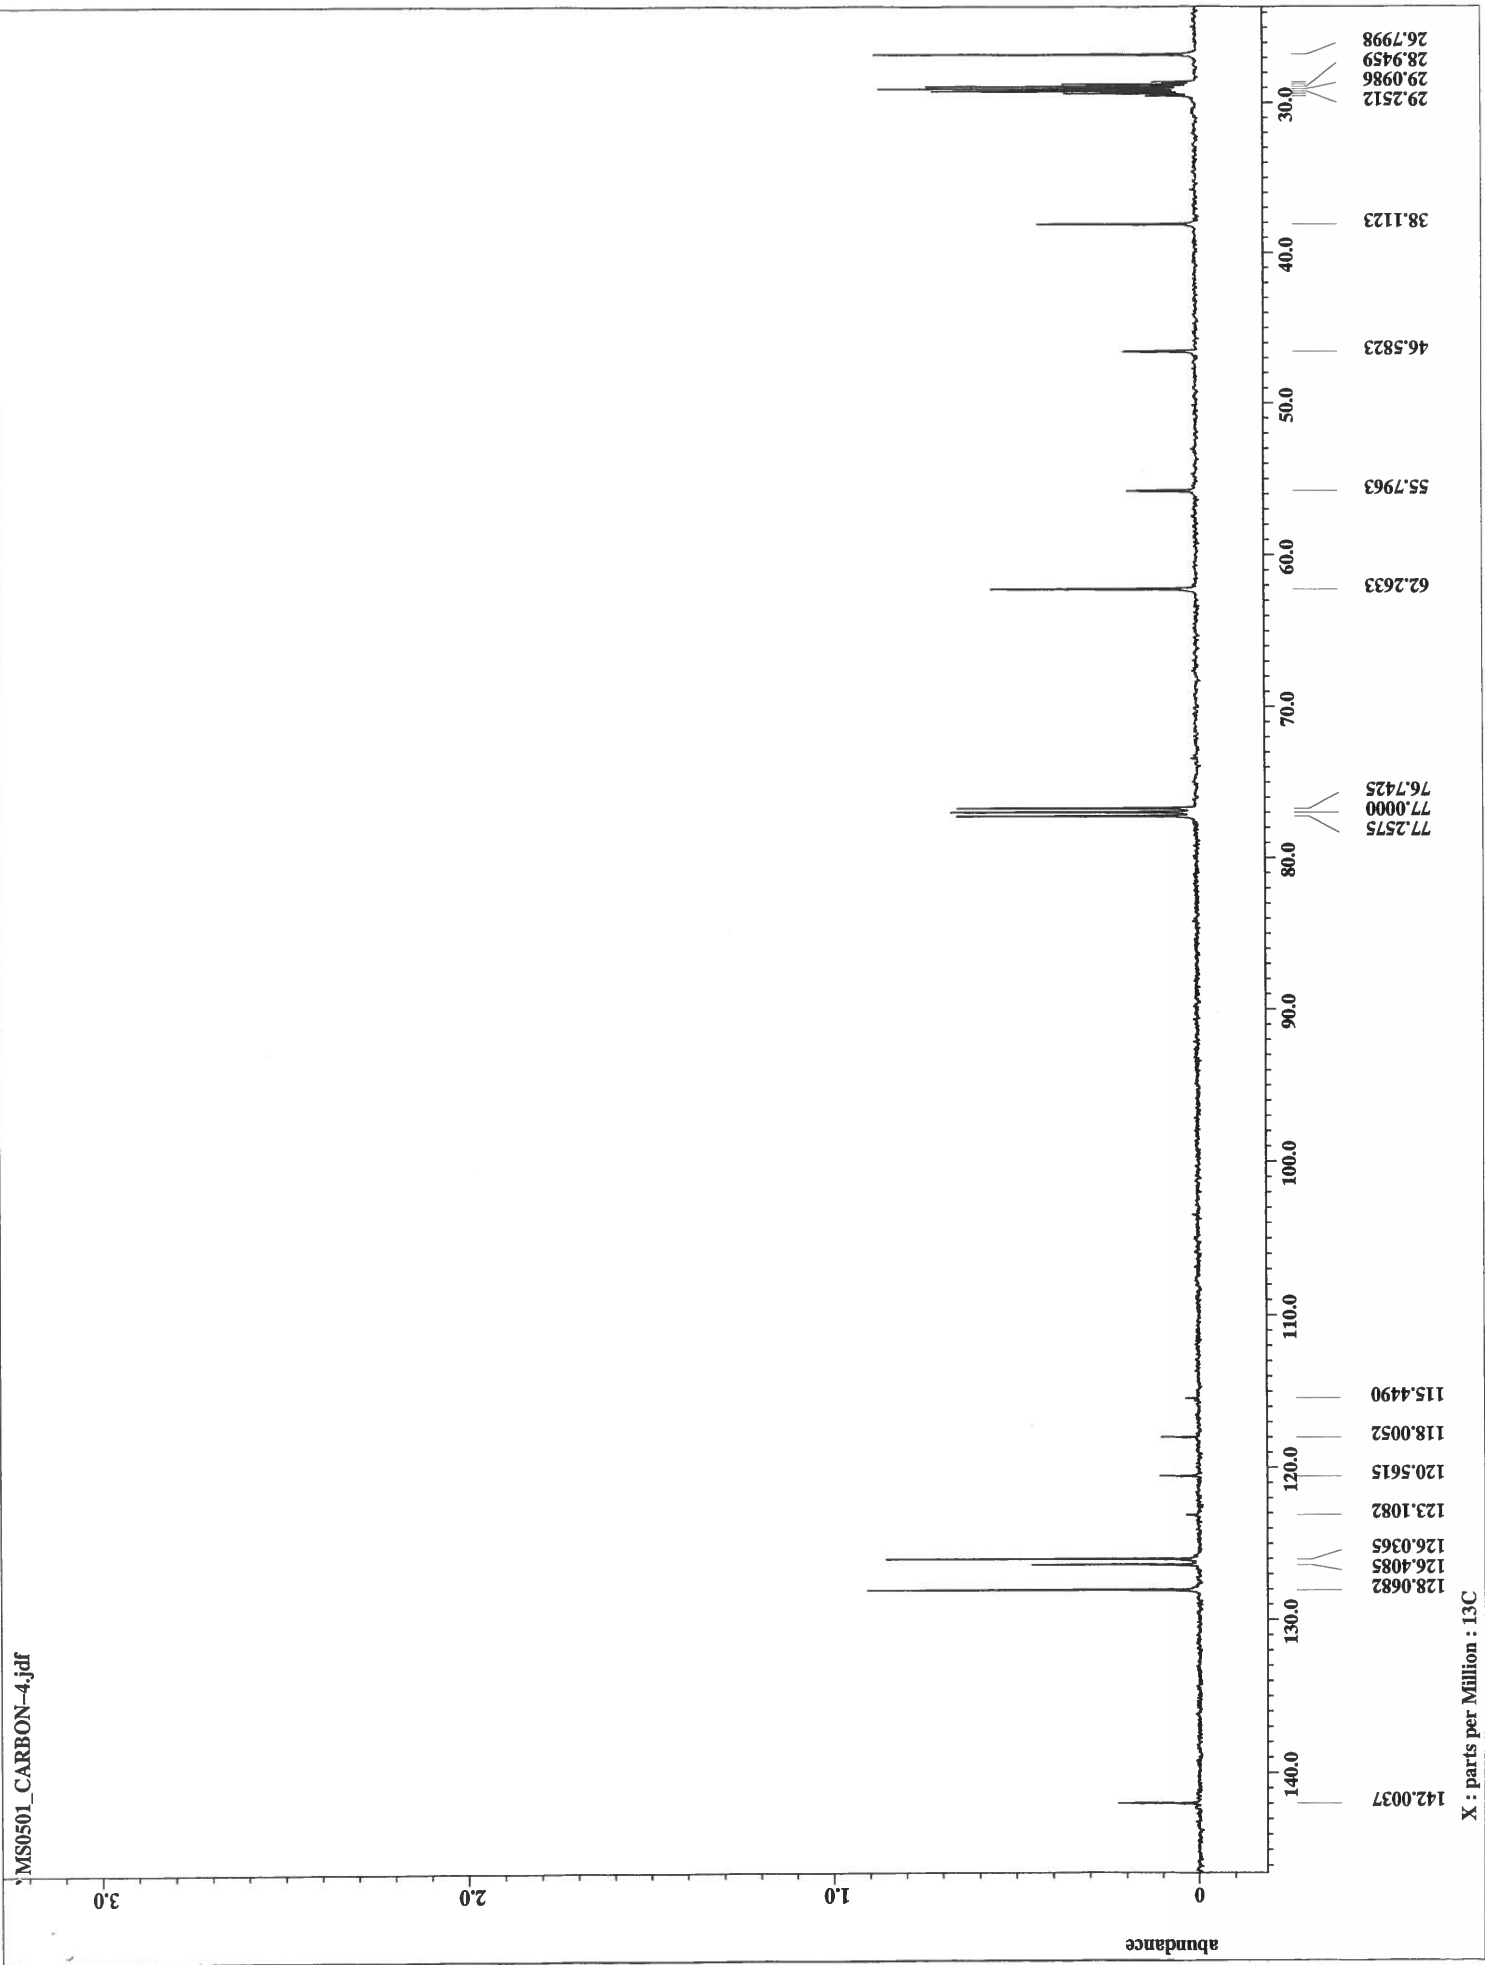

MS0501\_CARBON-4.jdf

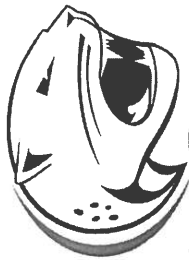SOUTH ALABAMA  
JAGUARS™

Filename = MS0501\_FLUORINE-2.jdf  
Author = Jim Davis  
Experiment = single\_pulse.ex2  
Sample\_id = MS0501  
Solvent = CHLOROFORM-D  
Charger\_sample = 11  
Creation\_time = 5-JUL-2018 17:00:44  
Revision\_time = 5-JUL-2018 16:37:16  
Current\_time = 5-JUL-2018 16:37:16  
Data\_format = 1D COMPLEX  
Dim\_size = 52428  
Dim\_title = 19F  
Dim\_units = [ppm]  
Dimensions = X  
Site = ECA 500  
Spectrometer = JNM-ECA500  
Field\_strength = 11.7473579[T] (500[MH  
X\_acq\_duration = 0.55574528[s]  
X\_domain = 19F  
X\_freq = 470.62046084[MHz]  
X\_offset = -70[ppm]  
X\_points = 65536  
X\_prescans = 1  
X\_resolution = 1.7993855[Hz]  
X\_sweep = 117.9245283[kHz]  
Irr\_domain = 19F  
Irr\_freq = 470.62046084[MHz]  
Irr\_offset = 5[ppm]  
Tri\_domain = 19F  
Tri\_freq = 470.62046084[MHz]  
Tri\_offset = 5[ppm]  
Clipped = FALSE  
Mod\_return = 1  
Scans = 16  
Total\_scans = 16  
X\_90\_width = 13.1[us]  
X\_acq\_time = 0.55574528[s]  
X\_angle = 45[deg]  
X\_atn = 2.5[db]  
X\_pulse = 6.55[us]  
Irr\_mode = Off  
Tri\_mode = Off  
Dante\_preset = FALSE  
Initial\_wait = 1[s]  
Recvr\_gain = 38  
Relaxation\_delay = 4[s]  
Repetition\_time = 4.55574528[s]  
Temp\_get = 22.8[dc]

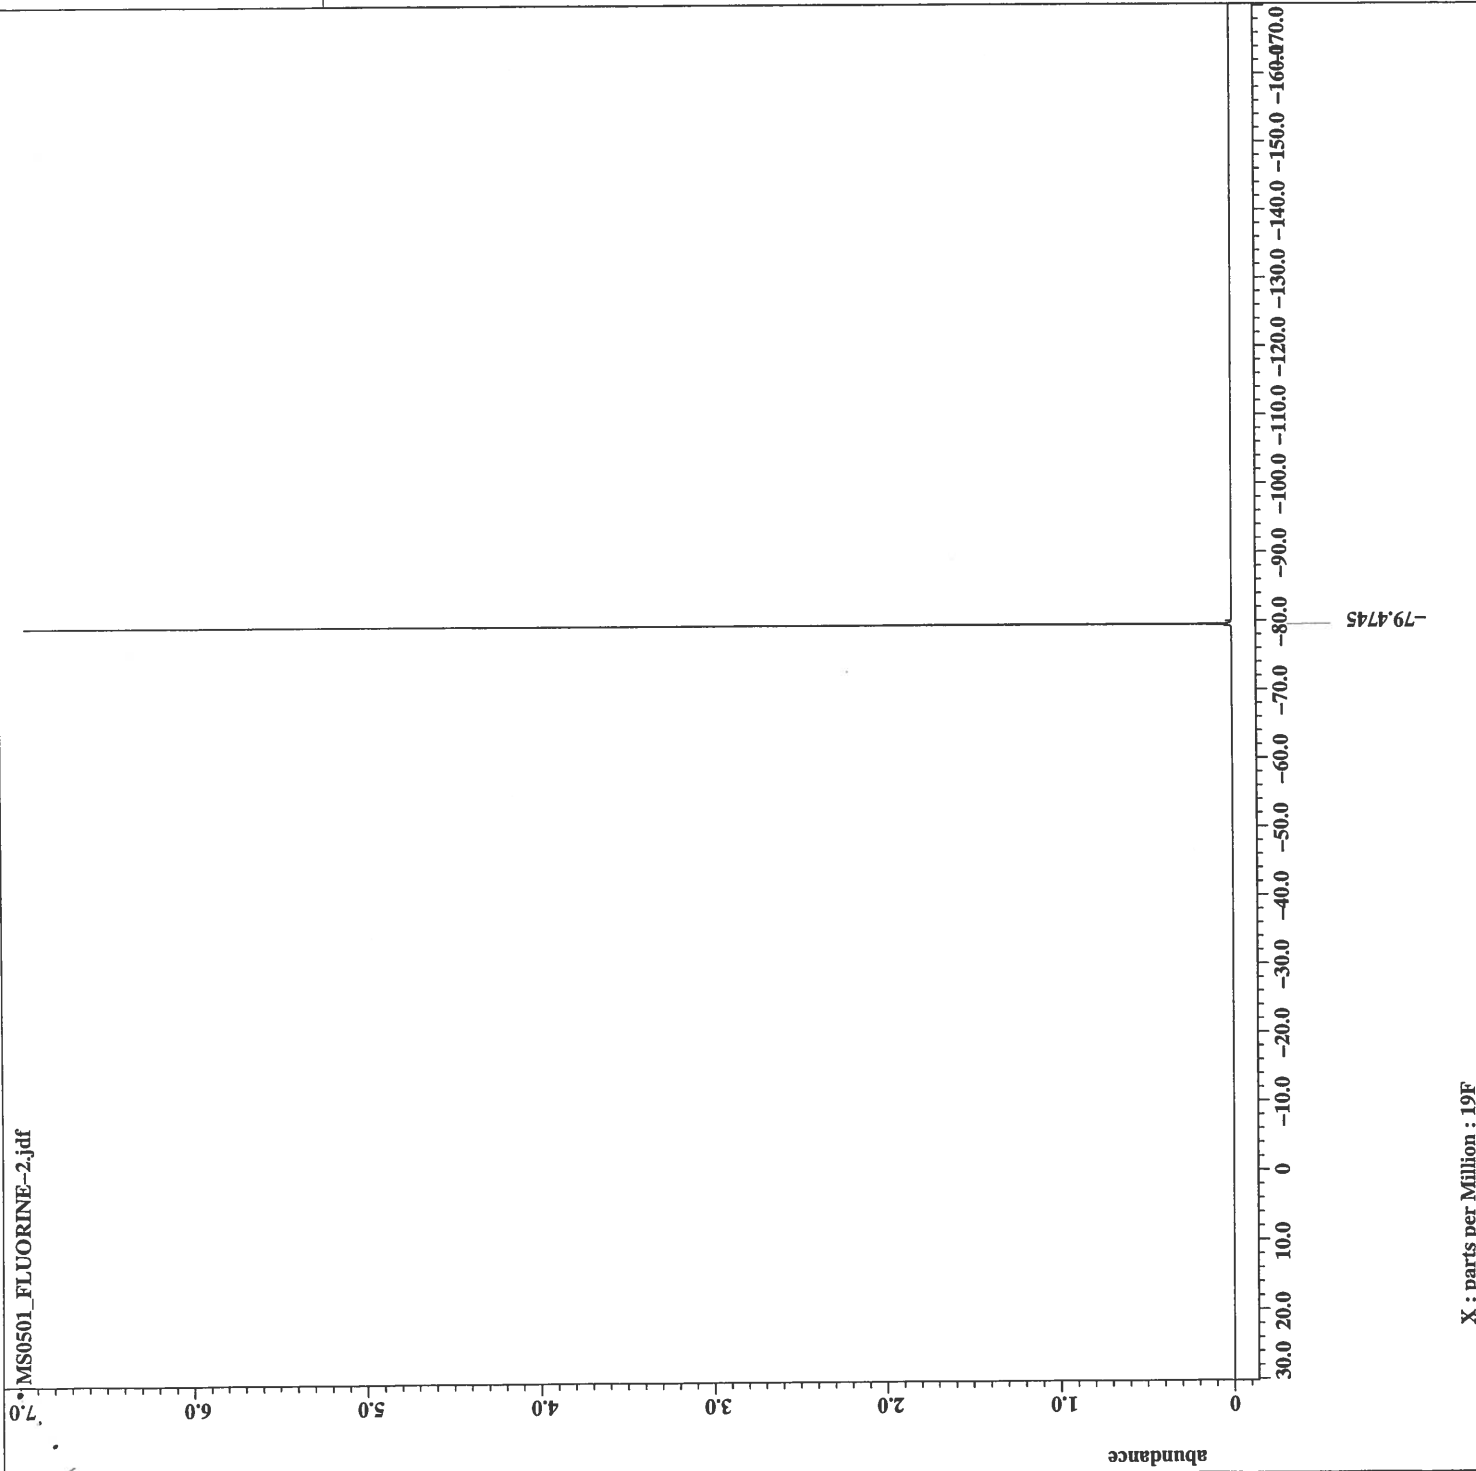



110.44

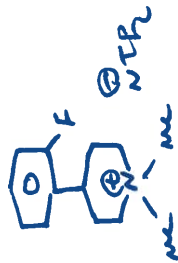

61.61

62.91

29.23  
33.02

abundance

7.0694  
7.0545  
6.8770  
6.87353.4368  
3.3807  
3.0532  
3.04522.3810  
2.0420  
2.0351  
1.8129

11.0 10.0 9.0 8.0 7.0 6.0 5.0 4.0 3.0 2.0 1.0 0

X : parts per Million : 1H

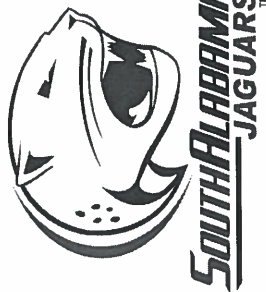

Filename = MS0519-Crystals\_PROTO  
 Author = Jim Davis  
 Experiment = single\_pulse.ex2  
 Sample\_id = MS0519-Crystals  
 Solvent = CHLOROFORM-D  
 Changer\_sample = 6  
 Creation\_time = 25-JUL-2018 09:12:03  
 Revision\_time = 25-JUL-2018 08:48:40  
 Current\_time = 25-JUL-2018 08:48:40  
 Data\_format = 1D COMPLEX  
 Dim\_size = 13107  
 Dim\_title = 1H  
 Dim\_units = [ppm]  
 Dimensions = X  
 Site = ECA 500  
 Spectrometer = JNM-ECA500  
 Field\_strength = 11.7473579[T] (500[MH  
 X\_acq\_duration = 1.74587904[s]  
 X\_domain = 1H  
 X\_freq = 500.15991521[MHz]  
 X\_offset = 5.0[ppm]  
 X\_points = 16384  
 X\_prescans = 1  
 X\_resolution = 0.57277737[Hz]  
 X\_sweep = 9.38438438[kHz]  
 Irr\_domain = 1H  
 Irr\_freq = 500.15991521[MHz]  
 Irr\_offset = 5.0[ppm]  
 Tri\_domain = 1H  
 Tri\_freq = 500.15991521[MHz]  
 Tri\_offset = 5.0[ppm]  
 Clipped = FALSE  
 Mod\_return = 1  
 Scans = 50  
 Total\_scans = 50  
 X\_90\_width = 12.4[us]  
 X\_acq\_time = 1.74587904[s]  
 X\_angle = 45[deg]  
 X\_atn = 4[db]  
 X\_pulse = 6.2[us]  
 Irr\_mode = Off  
 Tri\_mode = Off  
 Dante\_preset = FALSE  
 Initial\_wait = 1[s]  
 Recvr\_gain = 30  
 Relaxation\_delay = 4[s]  
 Repetition\_time = 5.74587904[s]  
 Temp\_get = 22.4[dc]

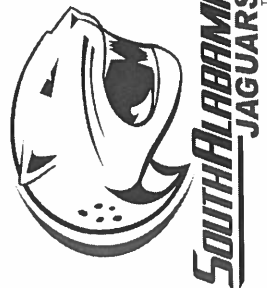

Filename = MS0519-Crystals\_PROTO  
 Author = Jim Davis  
 Experiment = single\_pulse.ex2  
 Sample\_id = MS0519-Crystals  
 Solvent = CHLOROFORM-D  
 Changer\_sample = 6  
 Creation\_time = 25-JUL-2018 08:46:11  
 Revision\_time = 25-JUL-2018 08:22:50  
 Current\_time = 25-JUL-2018 08:22:50  
 Data\_format = 1D COMPLEX  
 Dim\_size = 13107  
 Dim\_title = 1H  
 Dim\_units = [ppm]  
 Dimensions = x  
 Site = ECA 500  
 Spectrometer = JNM-ECA500  
 Field\_strength = 11.7473579[T] (500 [MH  
 X\_acq\_duration = 1.74587904[s]  
 X\_domain = 1H  
 X\_freq = 500.15991521 [MHz]  
 X\_offset = 5.0 [ppm]  
 X\_points = 16384  
 X\_prescans = 1  
 X\_resolution = 0.57277737 [Hz]  
 X\_sweep = 9.38438438 [kHz]  
 Irr\_domain = 1H  
 Irr\_freq = 500.15991521 [MHz]  
 Irr\_offset = 5.0 [ppm]  
 Tri\_domain = 1H  
 Tri\_freq = 500.15991521 [MHz]  
 Tri\_offset = 5.0 [ppm]  
 Clipped = FALSE  
 Mod\_return = 1  
 Scans = 16  
 Total\_scans = 16  
 X\_90\_width = 12.4 [us]  
 X\_acq\_time = 1.74587904 [s]  
 X\_angle = 45 [deg]  
 X\_atn = 4 [dB]  
 X\_pulse = 6.2 [us]  
 Irr\_mode = Off  
 Tri\_mode = Off  
 Dante\_preset = FALSE  
 Initial\_wait = 1 [s]  
 Recvr\_gain = 30  
 Relaxation\_delay = 4 [s]  
 Repetition\_time = 5.74587904 [s]  
 Temp\_get = 22 [C]

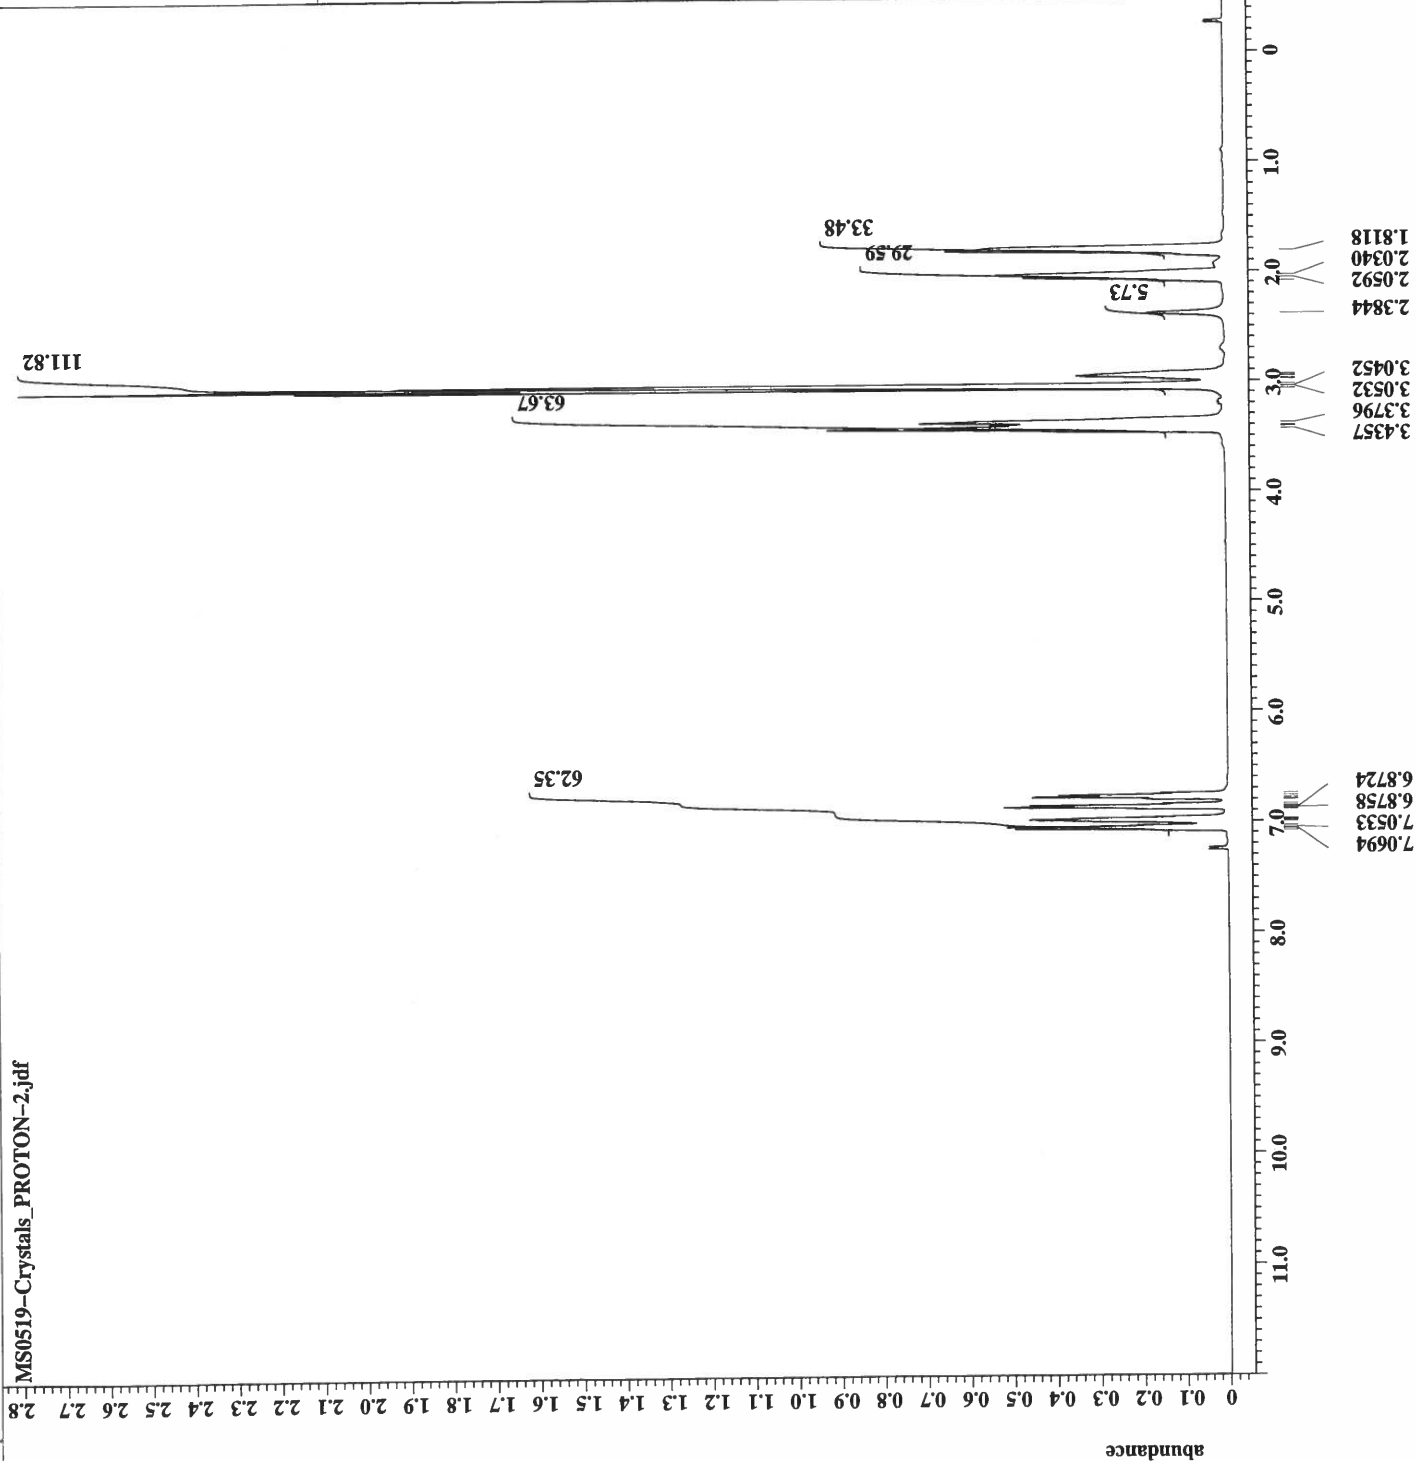

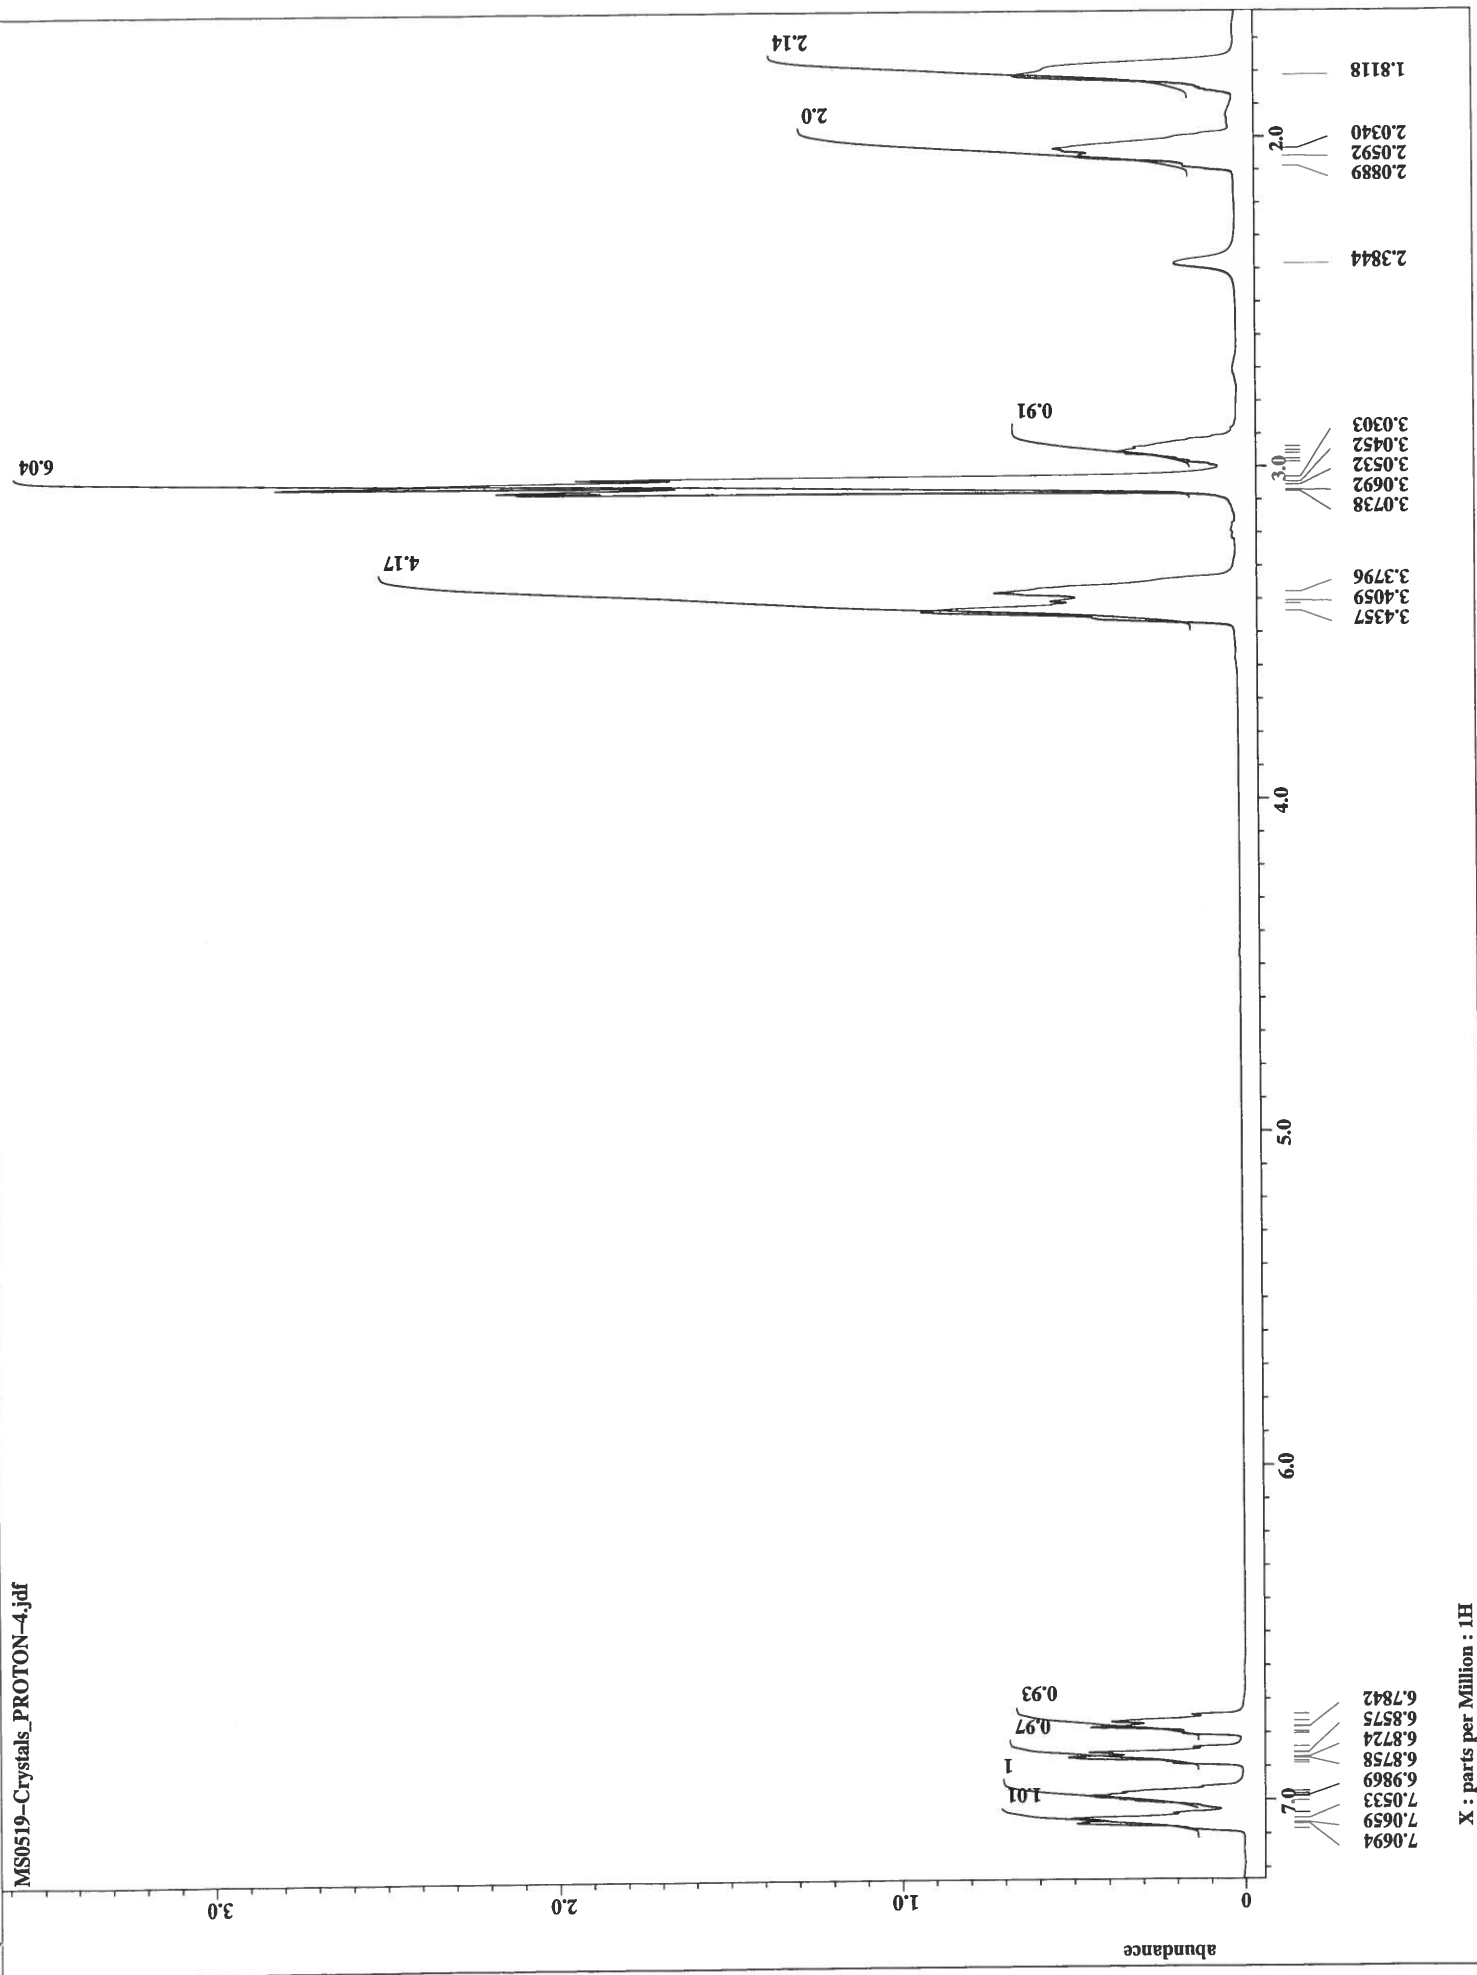

abundance

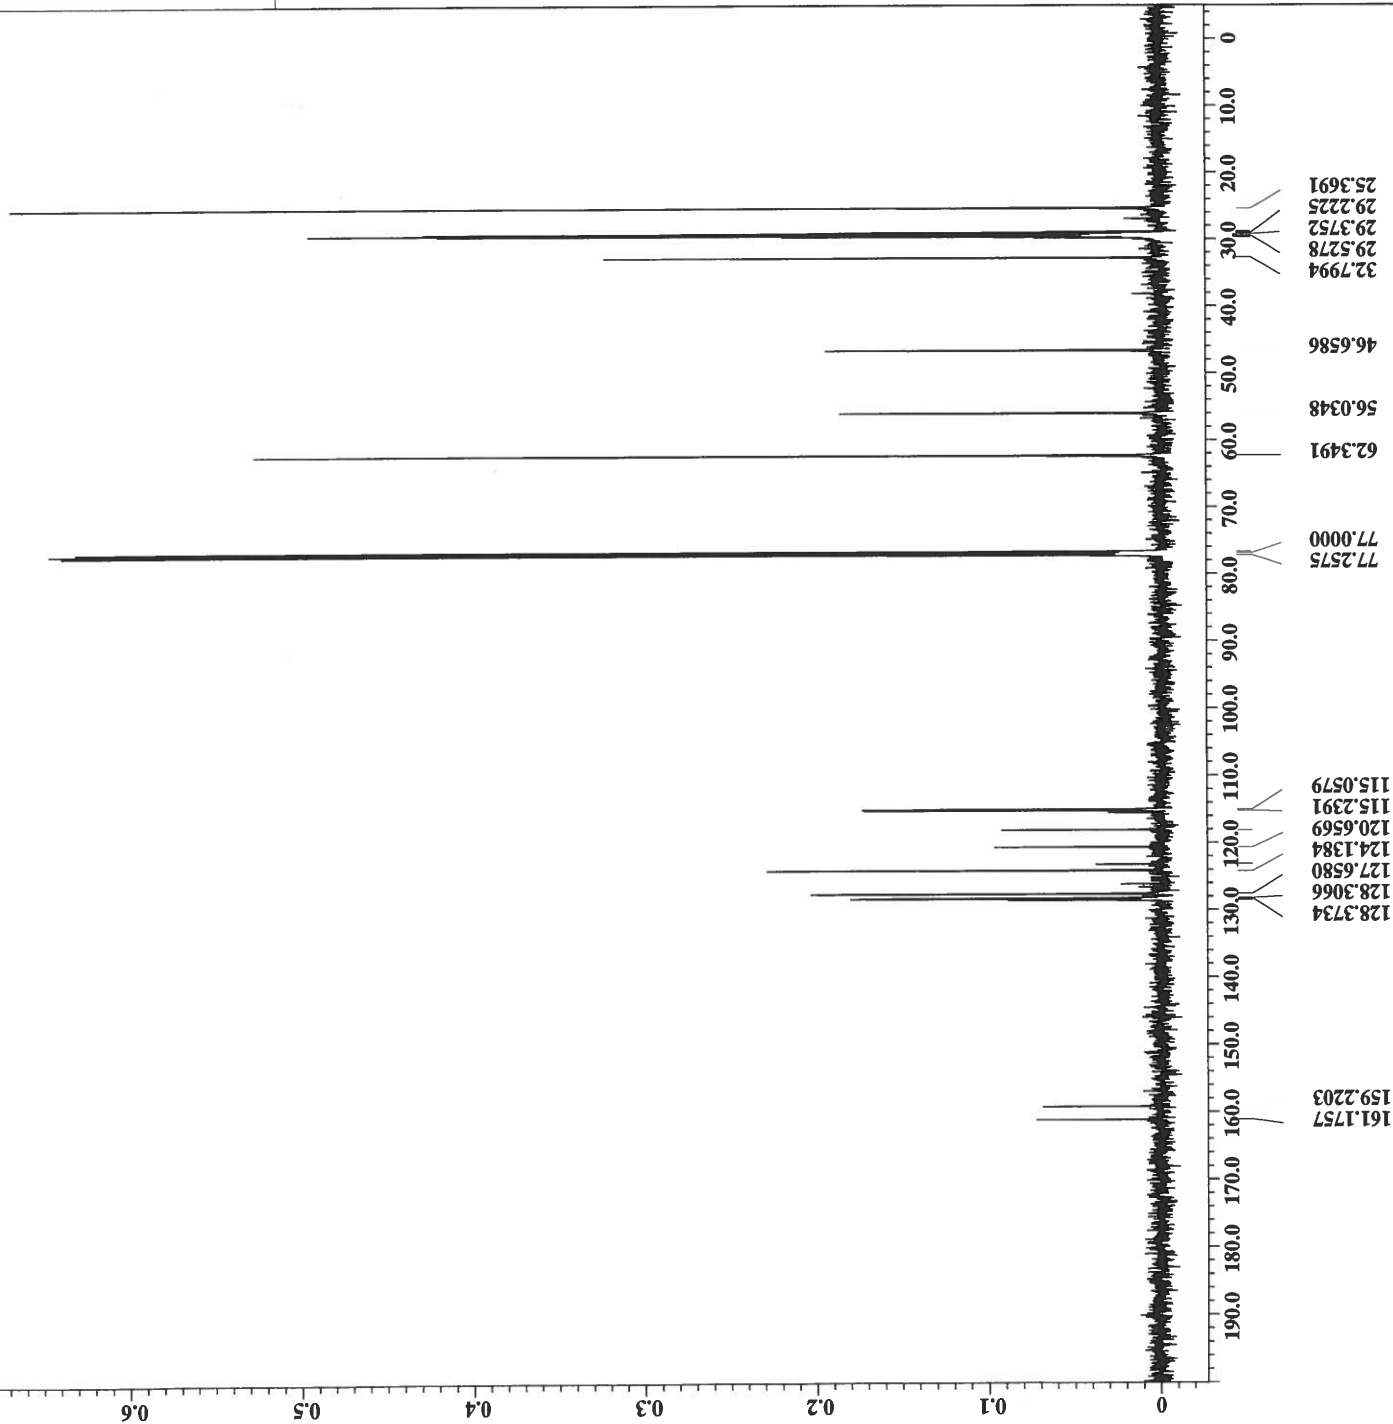X : parts per Million : <sup>13</sup>C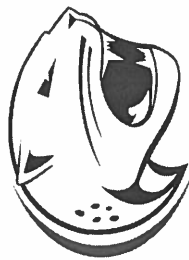
**SOUTH ALABAMA**  
**JAGUARS**

```

Filename = MS0519-Crystals_CARBO
Author = Jim Davis
Experiment = single_pulse_dec
Sample_id = MS0519-Crystals
Solvent = CHLOROFORM-D
Changer_sample = 6
Creation_time = 25-JUL-2018 09:02:33
Revision_time = 25-JUL-2018 08:39:11
Current_time = 25-JUL-2018 08:39:11

Data_format = 1D COMPLEX
Dim_size = 26214
Dim_title = 13C
Dim_units = [ppm]
Dimensions = X
Site = ECA 500
Spectrometer = JNM-ECA500

Field_strength = 11.7473579[T] (500[MH
X_acq_duration = 0.83361792[s]
X_domain = 13C
X_freq = 125.76529768[MHz]
X_offset = 100[ppm]
X_points = 32768
X_prescans = 4
X_resolution = 1.19959034[Hz]
X_sweep = 39.3081761[kHz]
Irr_domain = 1H
Irr_freq = 500.15991521[MHz]
Irr_offset = 5.0[ppm]
Clipped = FALSE
Mod_return = 1
Scans = 300
Total_scans = 300

X_90_width = 13.2[us]
X_acq_time = 0.83361792[s]
X_angle = 30[deg]
X_atn = 6[db]
X_pulse = 4.4[us]
Irr_atn_dec = 20.7[db]
Irr_atn_noe = 20.7[db]
Irr_noise = WALTZ
Decoupling = TRUE
Initial_wait = 1[s]
Noe = TRUE
Noe_time = 2[s]
Recvr_gain = 60
Relaxation_delay = 2[s]
Repetition_time = 2.83361792[s]
Temp_get = 22.5[dc]

```

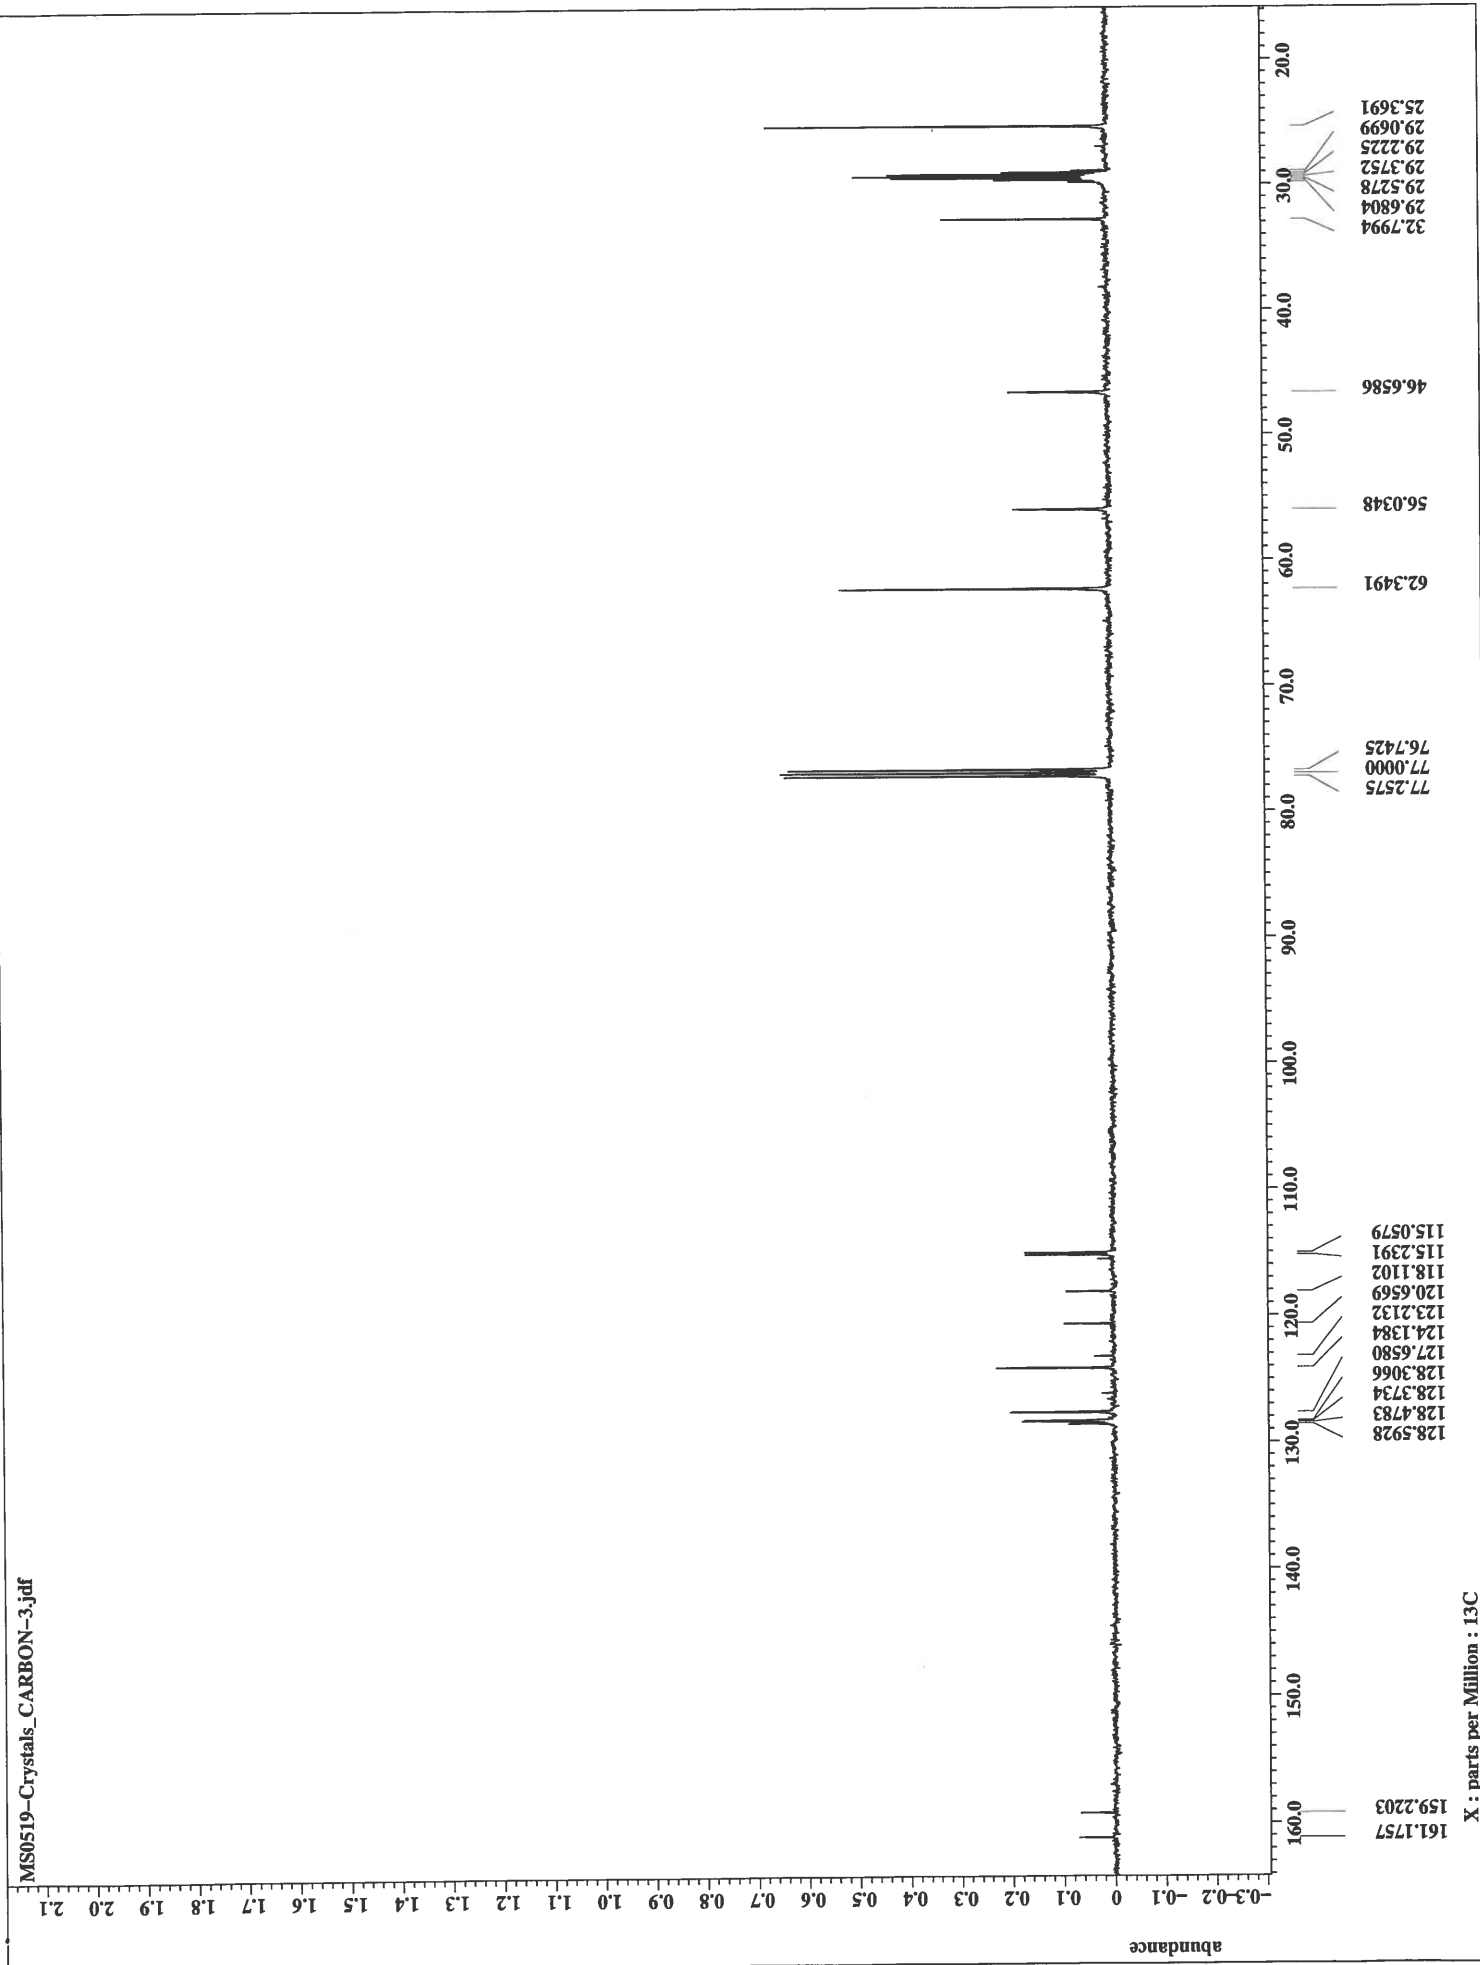

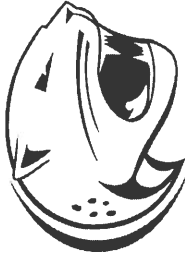

**SOUTH ALABAMA**  
**JAGUARS**™

Filename = MS0519-Crystals\_FLUOR  
Author = Jim Davis  
Experiment = single\_pulse.ex2  
Sample\_id = MS0519-Crystals  
Solvent = CHLOROFORM-D  
Changer\_sample = 6  
Creation\_time = 25-JUL-2018 09:05:38  
Revision\_time = 25-JUL-2018 08:42:15  
Current\_time = 25-JUL-2018 08:42:15  
Data\_format = 1D COMPLEX  
Dim\_size = 52428  
Dim\_title = 19F  
Dim\_units = [ppm]  
Dimensions = X  
Site = ECA 500  
Spectrometer = JNM-ECA500  
Field\_strength = 11.7473579[T] (500[MH  
X\_acq\_duration = 0.55574528[s]  
X\_domain = 19F  
X\_freq = 470.62046084 [MHz]  
X\_offset = -70 [ppm]  
X\_points = 65536  
X\_prescans = 1  
X\_resolution = 1.7993855 [Hz]  
X\_sweep = 117.9245283 [kHz]  
Irr\_domain = 19F  
Irr\_freq = 470.62046084 [MHz]  
Irr\_offset = 5 [ppm]  
Tri\_domain = 19F  
Tri\_freq = 470.62046084 [MHz]  
Tri\_offset = 5 [ppm]  
Clipped = FALSE  
Mod\_return = 1  
Scans = 16  
Total\_scans = 16  
X\_90\_width = 13.1 [us]  
X\_acq\_time = 0.55574528 [s]  
X\_angle = 45 [deg]  
X\_atn = 2.5 [dB]  
X\_pulse = 6.55 [us]  
Irr\_mode = Off  
Tri\_mode = Off  
Dante\_preset = FALSE  
Initial\_wait = 1 [s]  
Recvr\_gain = 36  
Relaxation\_delay = 4 [s]  
Repetition\_time = 4.55574528 [s]  
Temp\_get = 22.4 [dC]



**SOUTH ALABAMA**  
**JAGUARS**™

Filename = MS0519-Crystals\_FLUOR  
Author = Jim Davis  
Experiment = single\_pulse.ex2  
Sample\_id = MS0519-Crystals  
Solvent = CHLOROFORM-D  
Changer\_sample = 6  
Creation\_time = 25-JUL-2018 09:05:38  
Revision\_time = 25-JUL-2018 08:42:15  
Current\_time = 25-JUL-2018 08:42:15  
Data\_format = 1D COMPLEX  
Dim\_size = 52428  
Dim\_title = 19F  
Dim\_units = [ppm]  
Dimensions = X  
Site = ECA 500  
Spectrometer = JNM-ECA500  
Field\_strength = 11.7473579[T] (500[MH  
X\_acq\_duration = 0.55574528[s]  
X\_domain = 19F  
X\_freq = 470.62046084 [MHz]  
X\_offset = -70 [ppm]  
X\_points = 65536  
X\_prescans = 1  
X\_resolution = 1.7993855 [Hz]  
X\_sweep = 117.9245283 [kHz]  
Irr\_domain = 19F  
Irr\_freq = 470.62046084 [MHz]  
Irr\_offset = 5 [ppm]  
Tri\_domain = 19F  
Tri\_freq = 470.62046084 [MHz]  
Tri\_offset = 5 [ppm]  
Clipped = FALSE  
Mod\_return = 1  
Scans = 16  
Total\_scans = 16  
X\_90\_width = 13.1 [us]  
X\_acq\_time = 0.55574528 [s]  
X\_angle = 45 [deg]  
X\_atn = 2.5 [dB]  
X\_pulse = 6.55 [us]  
Irr\_mode = Off  
Tri\_mode = Off  
Dante\_preset = FALSE  
Initial\_wait = 1 [s]  
Recvr\_gain = 36  
Relaxation\_delay = 4 [s]  
Repetition\_time = 4.55574528 [s]  
Temp\_get = 22.4 [dC]

abundance

30.0 20.0 10.0 0 -10.0 -20.0 -30.0 -40.0 -50.0 -60.0 -70.0 -80.0 -90.0 -100.0 -110.0 -120.0 -130.0 -140.0 -150.0 -160.0 70.0

-79.3292

-118.8367

X : parts per Million : 19F

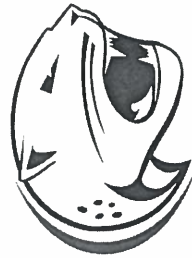

**SOUTH ALABAMA**  
**JAGUARS**

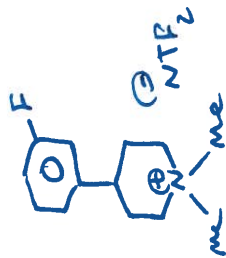

m.p = 118°C

89.48

70.23

37.34

33.32

15.66

16.84

16.7

1.72

2.0400  
2.2209  
2.2461  
2.2507  
2.9745  
2.9825  
3.2974  
3.3180  
3.6776  
3.6811

7.2792  
7.2666  
7.1281  
7.1132

5.4653

X : parts per Million : 1H

Filename = MS0486\_PROTON-2.jdf  
 Author = Jim Davis  
 Experiment = single\_pulse.ex2  
 Sample\_id = MS0486  
 Solvent = ACETONE-D6  
 Changer\_sample = 11  
 Creation\_time = 27-JUN-2018 10:42:54  
 Revision\_time = 27-JUN-2018 10:20:02  
 Current\_time = 27-JUN-2018 10:20:02  
 Data\_format = 1D COMPLEX  
 Dim\_size = 13107  
 Dim\_title = 1H  
 Dim\_units = [ppm]  
 Dimensions = X  
 Site = ECA 500  
 Spectrometer = JNM-ECA500  
 Field\_strength = 11.7473579[T] (500[MH  
 X\_acq\_duration = 1.74587904[s]  
 X\_domain = 1H  
 X\_freq = 500.15991521[MHz]  
 X\_offset = 5.0[ppm]  
 X\_points = 16384  
 X\_prescans = 1  
 X\_resolution = 0.57277737[Hz]  
 X\_sweep = 9.38438438[kHz]  
 Irr\_domain = 1H  
 Irr\_freq = 500.15991521[MHz]  
 Irr\_offset = 5.0[ppm]  
 Tri\_domain = 1H  
 Tri\_freq = 500.15991521[MHz]  
 Tri\_offset = 5.0[ppm]  
 Clipped = FALSE  
 Mod\_return = 1  
 Scans = 16  
 Total\_scans = 16  
 X\_90\_width = 12.4[us]  
 X\_acq\_time = 1.74587904[s]  
 X\_angle = 45[deg]  
 X\_atn = 4[db]  
 X\_pulse = 6.2[us]  
 Irr\_mode = Off  
 Tri\_mode = Off  
 Dante\_preset = FALSE  
 Initial\_wait = 1[s]  
 Recvr\_gain = 22  
 Relaxation\_delay = 4[s]  
 Repetition\_time = 5.74587904[s]  
 Temp\_get = 22.3[dc]

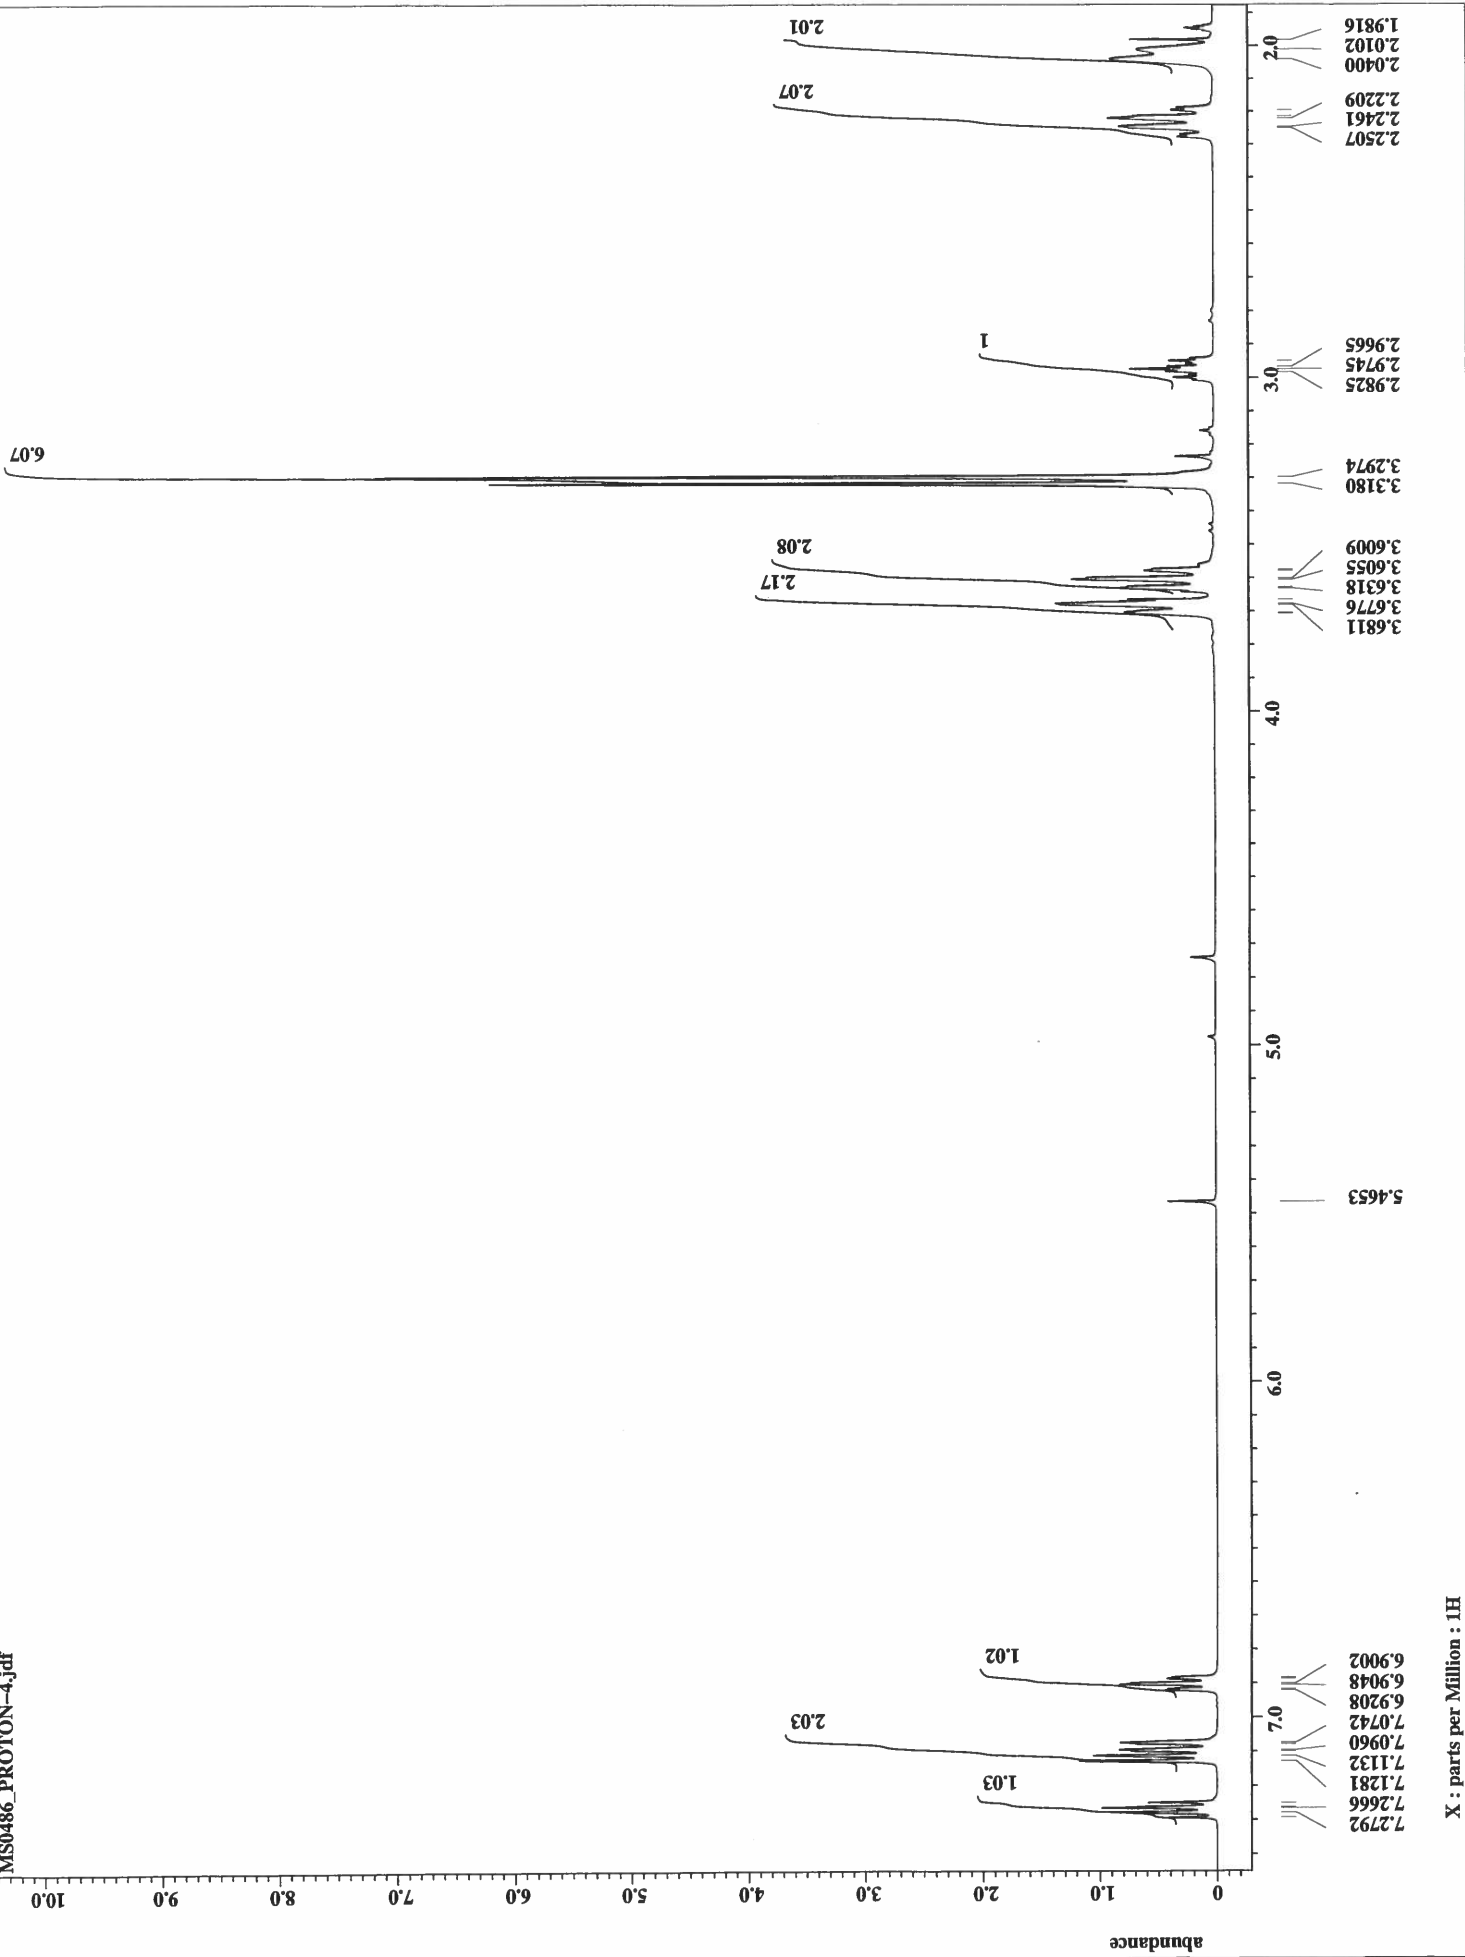



3.0

2.0

1.0

abundance

164.7102

162.7739

160.0

147.1406  
147.0833

150.0

140.0

131.2402  
131.1734

130.0

124.6873

123.7526

122.1311

120.0

119.5748

117.0280

114.4622  
114.3859  
114.2905  
114.2142

X : parts per Million : 13C

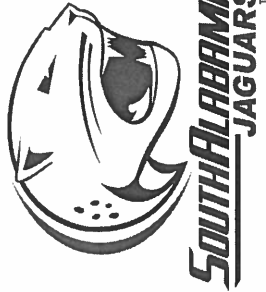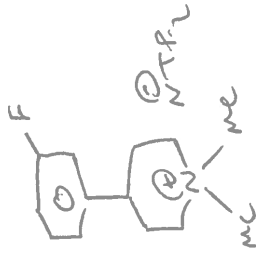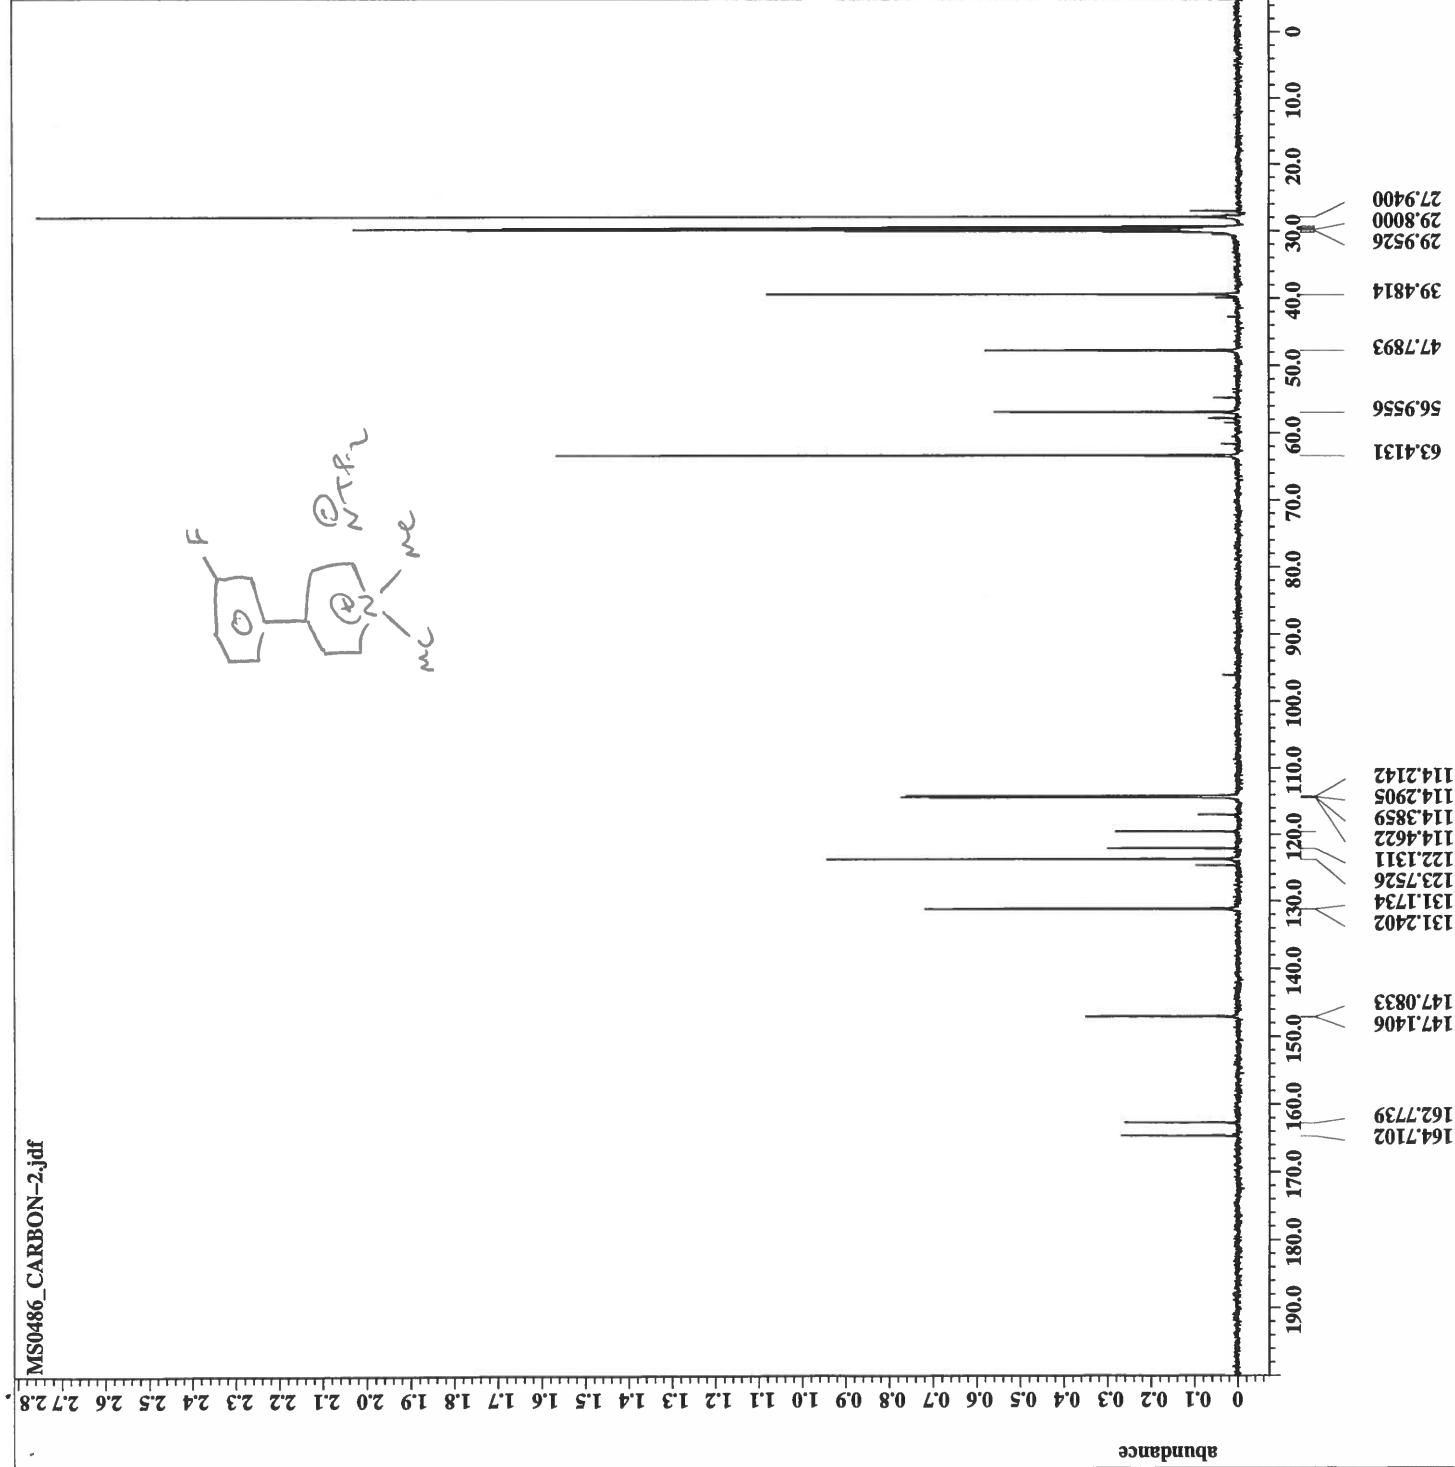

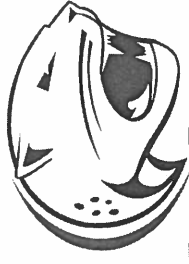

**SOUTH ALABAMA**  
**JAGUARS**

```

Filename      = MS0486_FLUORINE-2.jdf
Author       = Jim Davis
Experiment    = single_pulse.ex2
Sample_id    = MS0486
Solvent      = ACETONE-D6
Charger_sample 11
Creation_time 27-JUN-2018 10:39:16
Revision_time 27-JUN-2018 10:16:23
Current_time  27-JUN-2018 10:16:24

Data_format   = 1D COMPLEX
Dim_size      = 52428
Dim_title     = 19F
Dim_units     = [ppm]
Dimensions    = X
Site          = ECA 500
Spectrometer  = JNM-ECA500

Field_strength = 11.7473579[T] (500[MH
X_acq_duration = 0.55574528[s]
X_domain      = 19F
X_freq        = 470.62046084[MHz]
X_offset      = -70[ppm]
X_points      = 65536
X_prescans    = 1
X_resolution  = 1.7993855[Hz]
X_sweep       = 117.9245283[kHz]
Irr_domain    = 19F
Irr_freq      = 470.62046084[MHz]
Irr_offset    = 5[ppm]
Tri_domain    = 19F
Tri_freq      = 470.62046084[MHz]
Tri_offset    = 5[ppm]
Clipped       = FALSE
Mod_return    = 1
Scans         = 16
Total_scans   = 16

X_90_width    = 13.1[us]
X_acq_time    = 0.55574528[s]
X_angle       = 45[deg]
X_atn         = 2.5[dB]
X_pulse       = 6.55[us]
Irr_mode      = Off
Tri_mode      = Off
Dante_preset  = FALSE
Initial_wait  = 1[s]
Recvr_gain    = 30
Relaxation_delay = 4[s]
Repetition_time = 4.55574528[s]
Temp_get      = 22.3[degC]

```

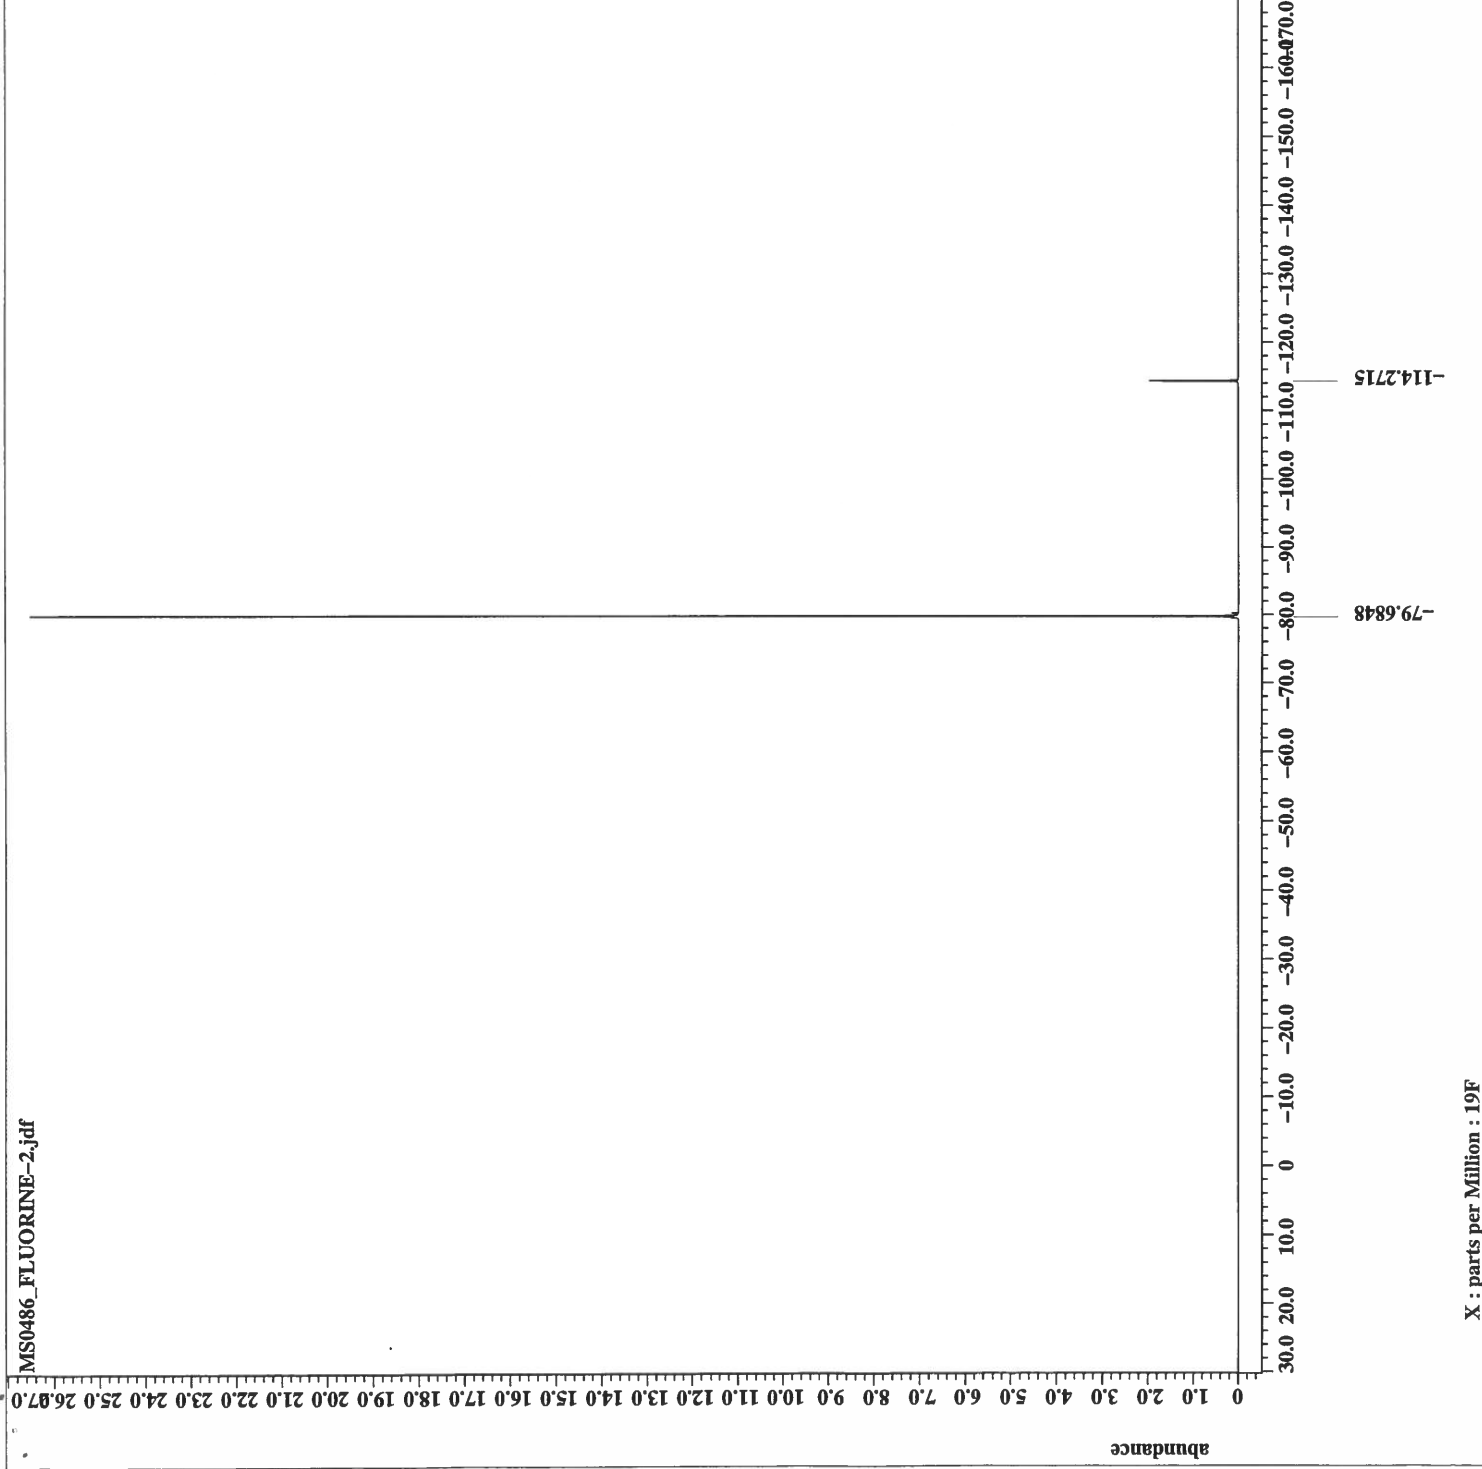

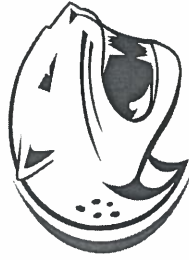

**SOUTH ALABAMA**  
**JAGUARS**

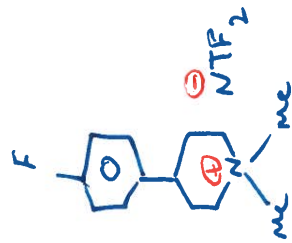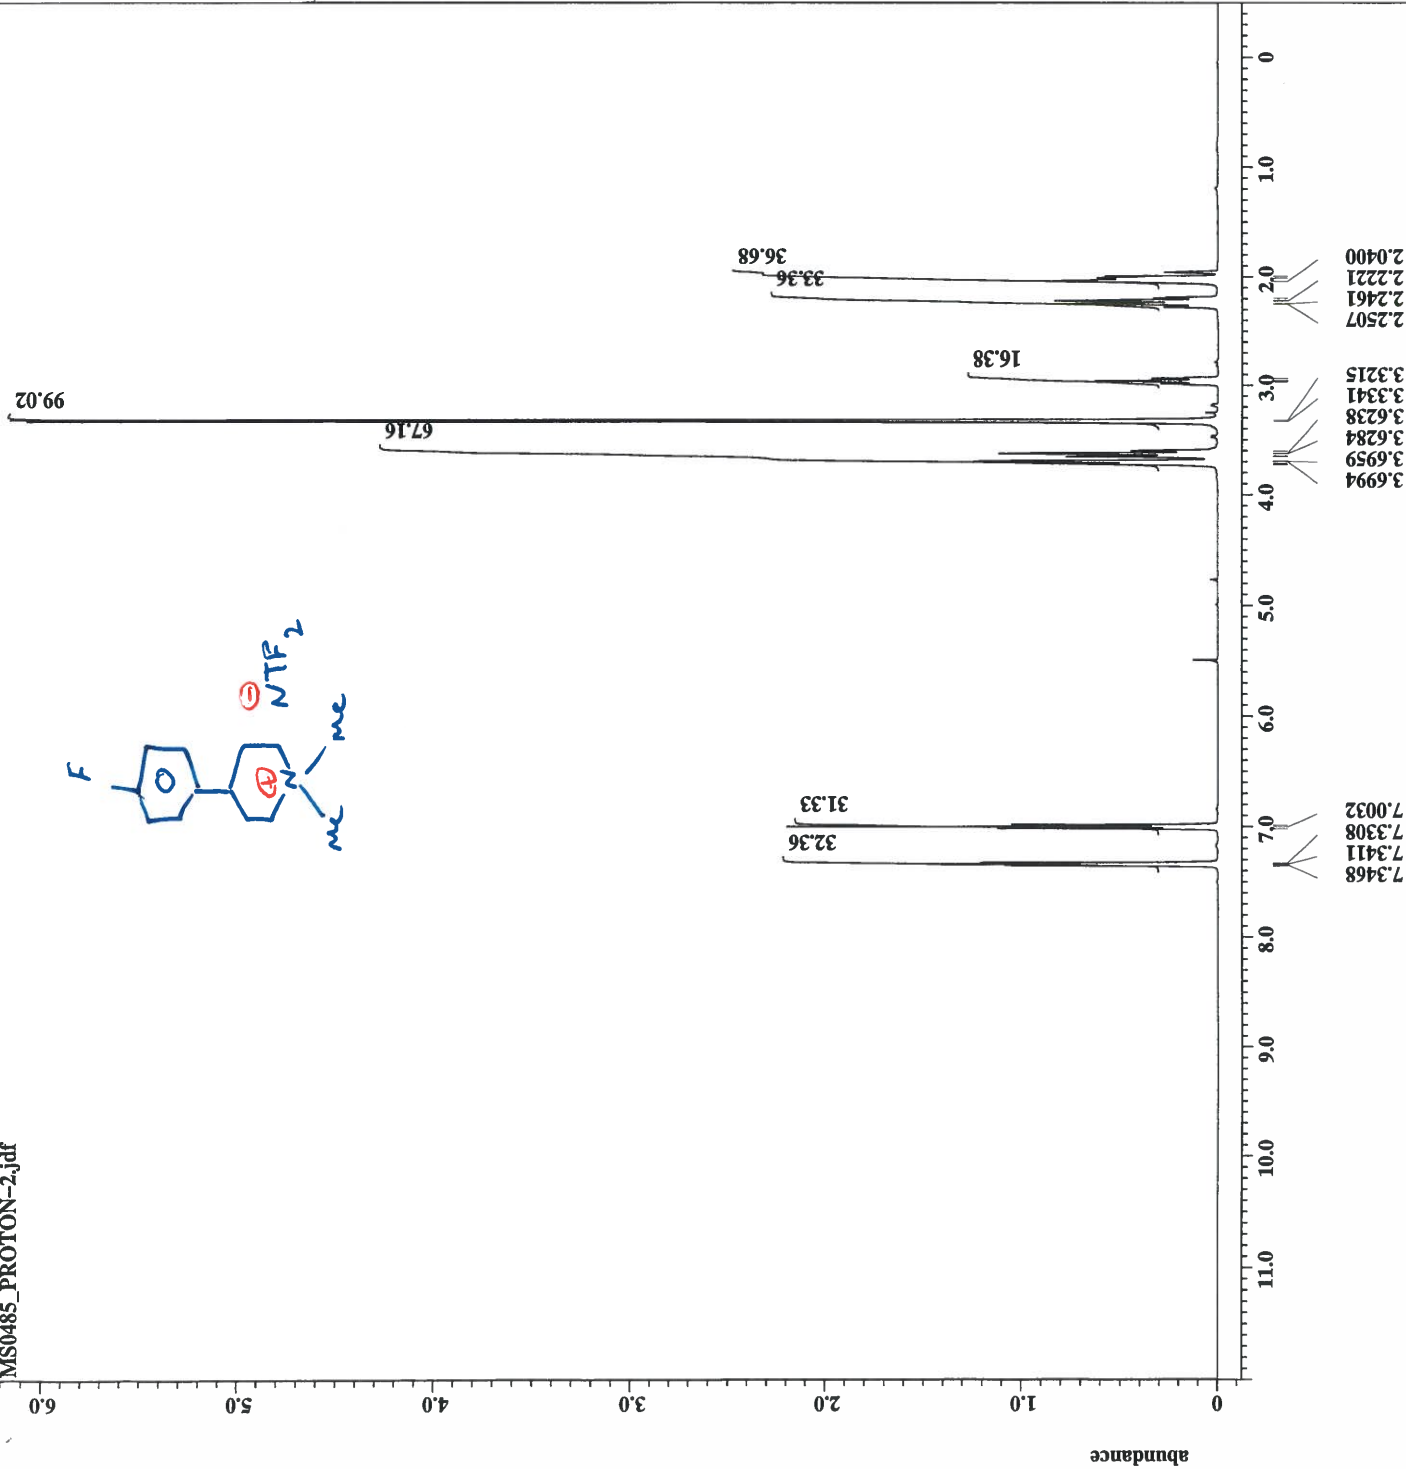

X : parts per Million : 1H

Filename = MS0485\_PROTON-2.jdf  
 Author = Jim Davis  
 Experiment = single\_pulse.ex2  
 Sample\_id = MS0485  
 Solvent = ACETONE-D6  
 Changer\_sample = 12  
 Creation\_time = 27-JUN-2018 11:38:17  
 Revision\_time = 27-JUN-2018 11:15:23  
 Current\_time = 27-JUN-2018 11:15:23  
 Data\_format = 1D COMPLEX  
 Dim\_size = 13107  
 Dim\_title = 1H  
 Dim\_units = [ppm]  
 Dimensions = X  
 Site = ECA 500  
 Spectrometer = JNM-ECA500  
 Field\_strength = 11.7473579[T] (500[MH  
 X\_acq\_duration = 1.74587904[s]  
 X\_domain = 1H  
 X\_freq = 500.15991521[MHz]  
 X\_offset = 5.0[ppm]  
 X\_points = 16384  
 X\_prescans = 1  
 X\_resolution = 0.57277737[Hz]  
 X\_sweep = 9.38438438[kHz]  
 Irr\_domain = 1H  
 Irr\_freq = 500.15991521[MHz]  
 Irr\_offset = 5.0[ppm]  
 Tri\_domain = 1H  
 Tri\_freq = 500.15991521[MHz]  
 Tri\_offset = 5.0[ppm]  
 Clipped = FALSE  
 Mod\_return = 1  
 Scans = 16  
 Total\_scans = 16  
 X\_90\_width = 12.4[us]  
 X\_acq\_time = 1.74587904[s]  
 X\_angle = 45[deg]  
 X\_atn = 4[db]  
 X\_pulse = 6.2[us]  
 Irr\_mode = Off  
 Tri\_mode = Off  
 Dante\_preset = FALSE  
 Initial\_wait = 1[s]  
 Recvr\_gain = 24  
 Relaxation\_delay = 4[s]  
 Repetition\_time = 5.74587904[s]  
 Temp\_get = 22.3[dc]

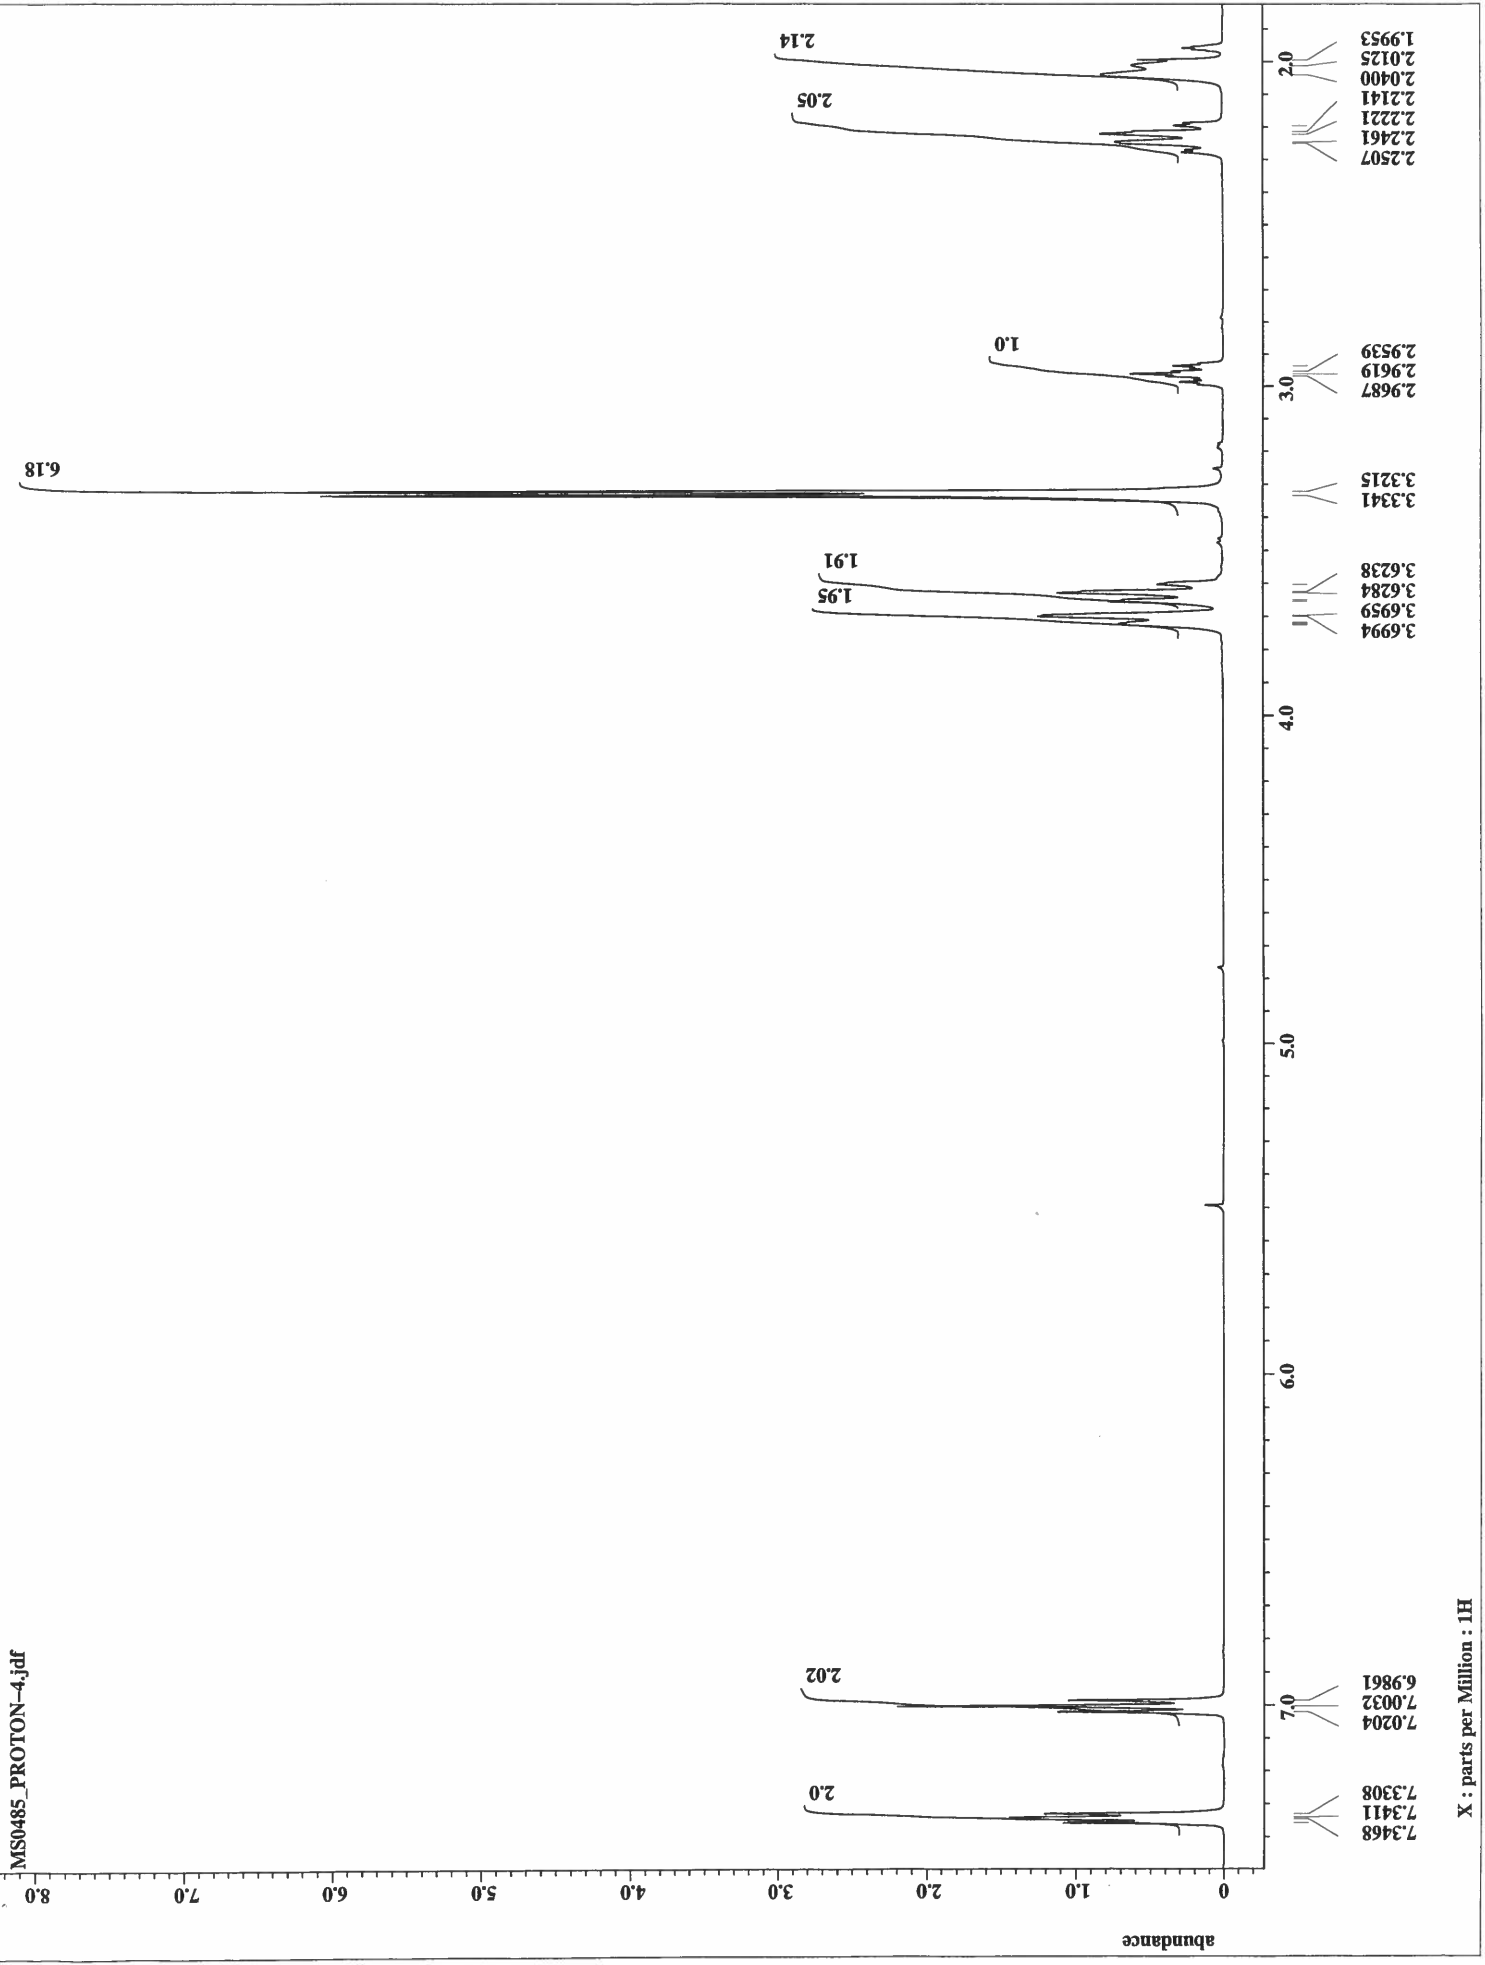

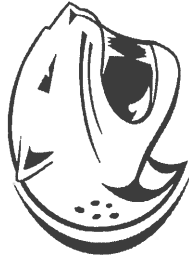

**SOUTH ALABAMA**  
JAGUARS™

Filename = MS0485\_CARBON-2.jdf  
 Author = Jim Davis  
 Experiment = single\_pulse\_dec  
 Sample\_id = MS0485  
 Solvent = ACETONE-D6  
 Changer\_sample = 12  
 Creation\_time = 27-JUN-2018 11:59:25  
 Revision\_time = 27-JUN-2018 11:36:31  
 Current\_time = 27-JUN-2018 11:36:31  
 Data\_format = 1D COMPLEX  
 Dim\_size = 26214  
 Dim\_title = 13C  
 Dim\_units = [ppm]  
 Dimensions = X  
 Site = ECA 500  
 Spectrometer = JNM-ECA500  
 Field\_strength = 11.7473579[T] (500[MH  
 X\_acq\_duration = 0.83361792[s]  
 X\_domain = 13C  
 X\_freq = 125.76529768 [MHz]  
 X\_offset = 100 [ppm]  
 X\_points = 32768  
 X\_prescans = 4  
 X\_resolution = 1.19959034 [Hz]  
 X\_sweep = 39.3081761 [kHz]  
 Irr\_domain = 1H  
 Irr\_freq = 500.15991521 [MHz]  
 Irr\_offset = 5.0 [ppm]  
 Clipped = FALSE  
 Mod\_return = 1  
 Scans = 400  
 Total\_scans = 400  
 X\_90\_width = 13.2 [us]  
 X\_acq\_time = 0.83361792 [s]  
 X\_angle = 30 [deg]  
 X\_atn = 6 [dB]  
 X\_pulse = 4.4 [us]  
 Irr\_atn\_dec = 20.7 [dB]  
 Irr\_atn\_noe = 20.7 [dB]  
 Irr\_noise = WALTZ  
 Decoupling = TRUE  
 Initial\_wait = 1 [s]  
 Noe = TRUE  
 Noe\_time = 2 [s]  
 Recvr\_gain = 60  
 Relaxation\_delay = 2 [s]  
 Repetition\_time = 2.83361792 [s]  
 Temp\_get = 22.9 [dC]

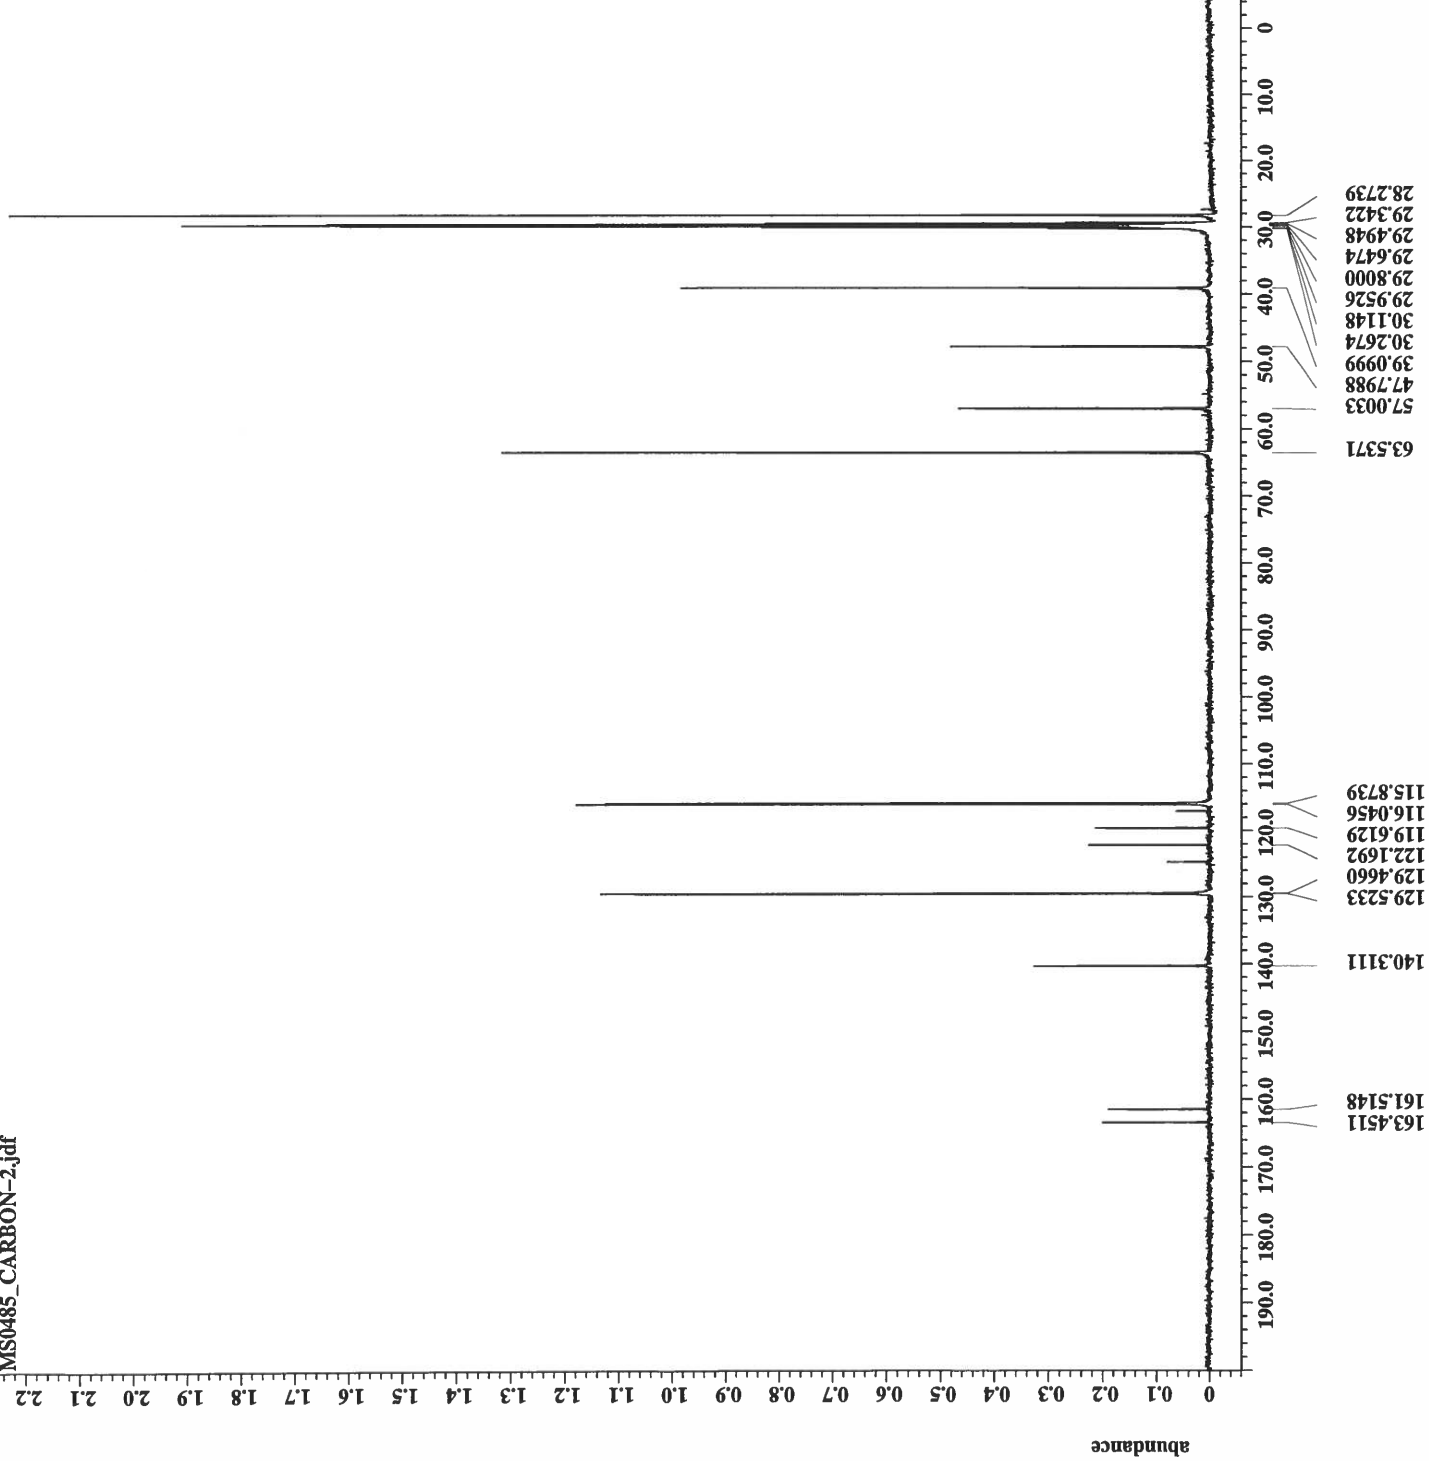

X : parts per Million : 13C

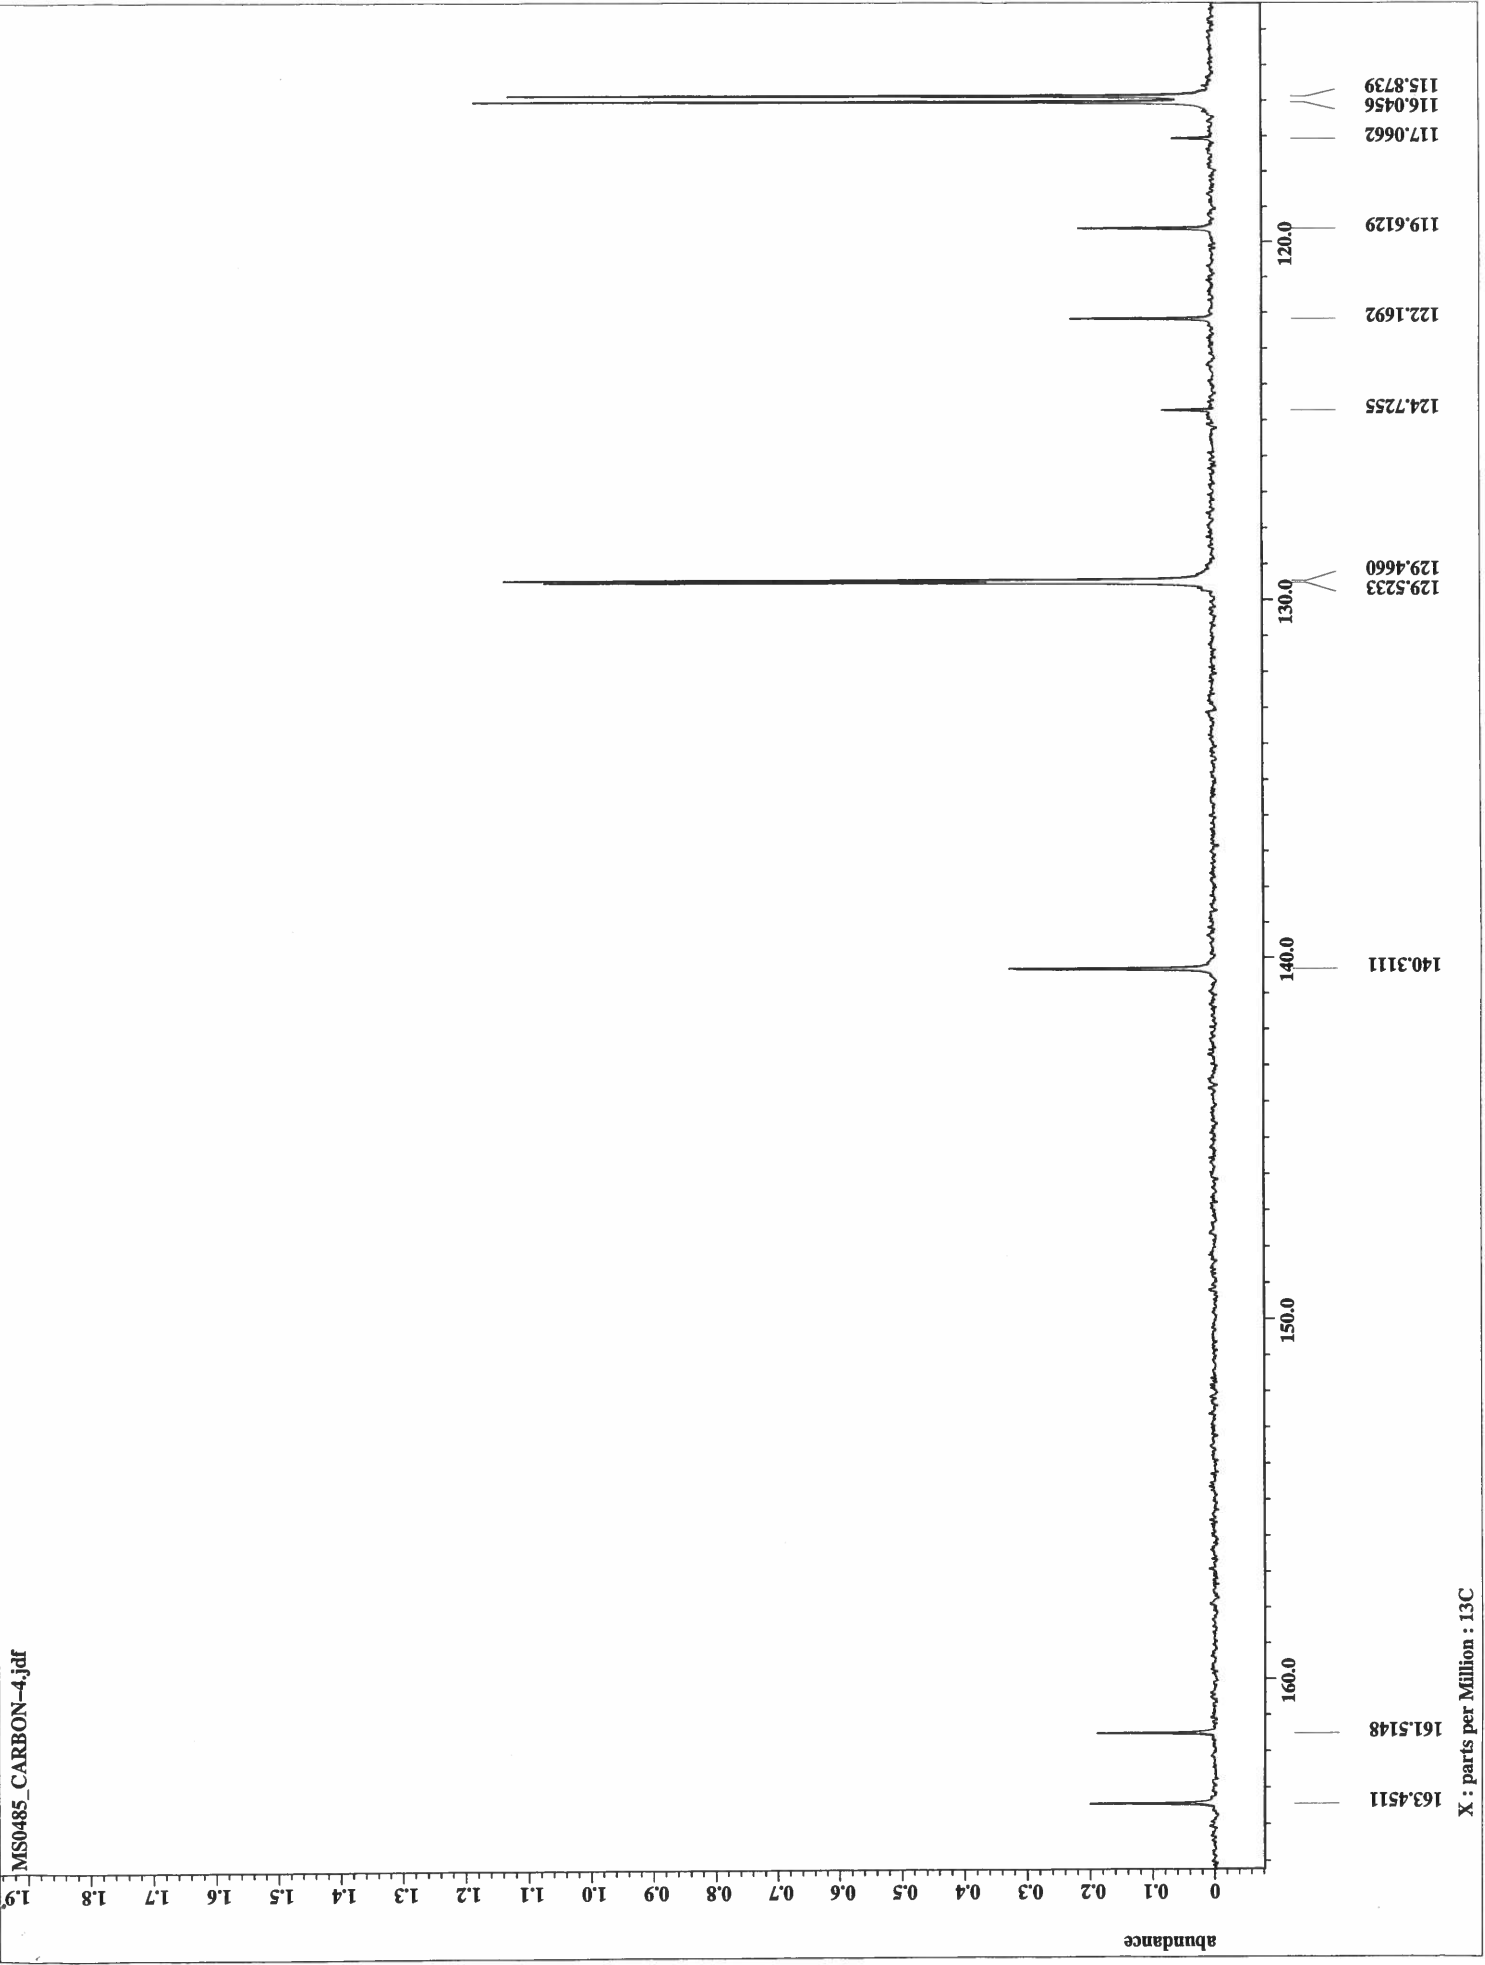

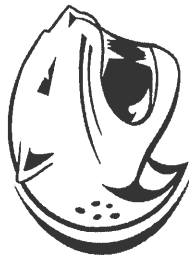

**SOUTH ALABAMA**  
**JAGUARS**

```

Filename      = MS0485_FLUORINE-2.jdf
Author       = Jim Davis
Experiment    = single_pulse.ex2
Sample_id    = MS0485
Solvent      = ACETONE-D6
Changer_sample = 12
Creation_time = 27-JUN-2018 11:34:58
Revision_time = 27-JUN-2018 11:12:05
Current_time  = 27-JUN-2018 11:12:05

Data_format  = 1D COMPLEX
Dim_size     = 52428
Dim_title    = 19F
Dim_units    = [ppm]
Dimensions   = X
Site         = ECA 500
Spectrometer = JNM-ECA500

Field_strength = 11.7473579[T] (500[MH
X_acq_duration = 0.55574528[s]
X_domain       = 19F
X_freq         = 470.62046084 [MHz]
X_offset       = -70 [ppm]
X_points       = 65536
X_prescans     = 1
X_resolution   = 1.7993855 [Hz]
X_sweep        = 117.9245283 [kHz]
Irr_domain     = 19F
Irr_freq       = 470.62046084 [MHz]
Irr_offset     = 5 [ppm]
Tri_domain     = 19F
Tri_freq       = 470.62046084 [MHz]
Tri_offset     = 5 [ppm]
Clipped        = FALSE
Mod_return     = 1
Scans          = 16
Total_scans    = 16

X_90_width     = 13.1 [us]
X_acq_time     = 0.55574528 [s]
X_angle        = 45 [deg]
X_atn          = 2.5 [dB]
X_pulse        = 6.55 [us]
Irr_mode       = Off
Tri_mode       = Off
Dante_presat   = FALSE
Initial_wait   = 1 [s]
Recvr_gain     = 34
Relaxation_delay = 4 [s]
Repetition_time = 4.55574528 [s]
Temp_get       = 22.3 [dC]
  
```

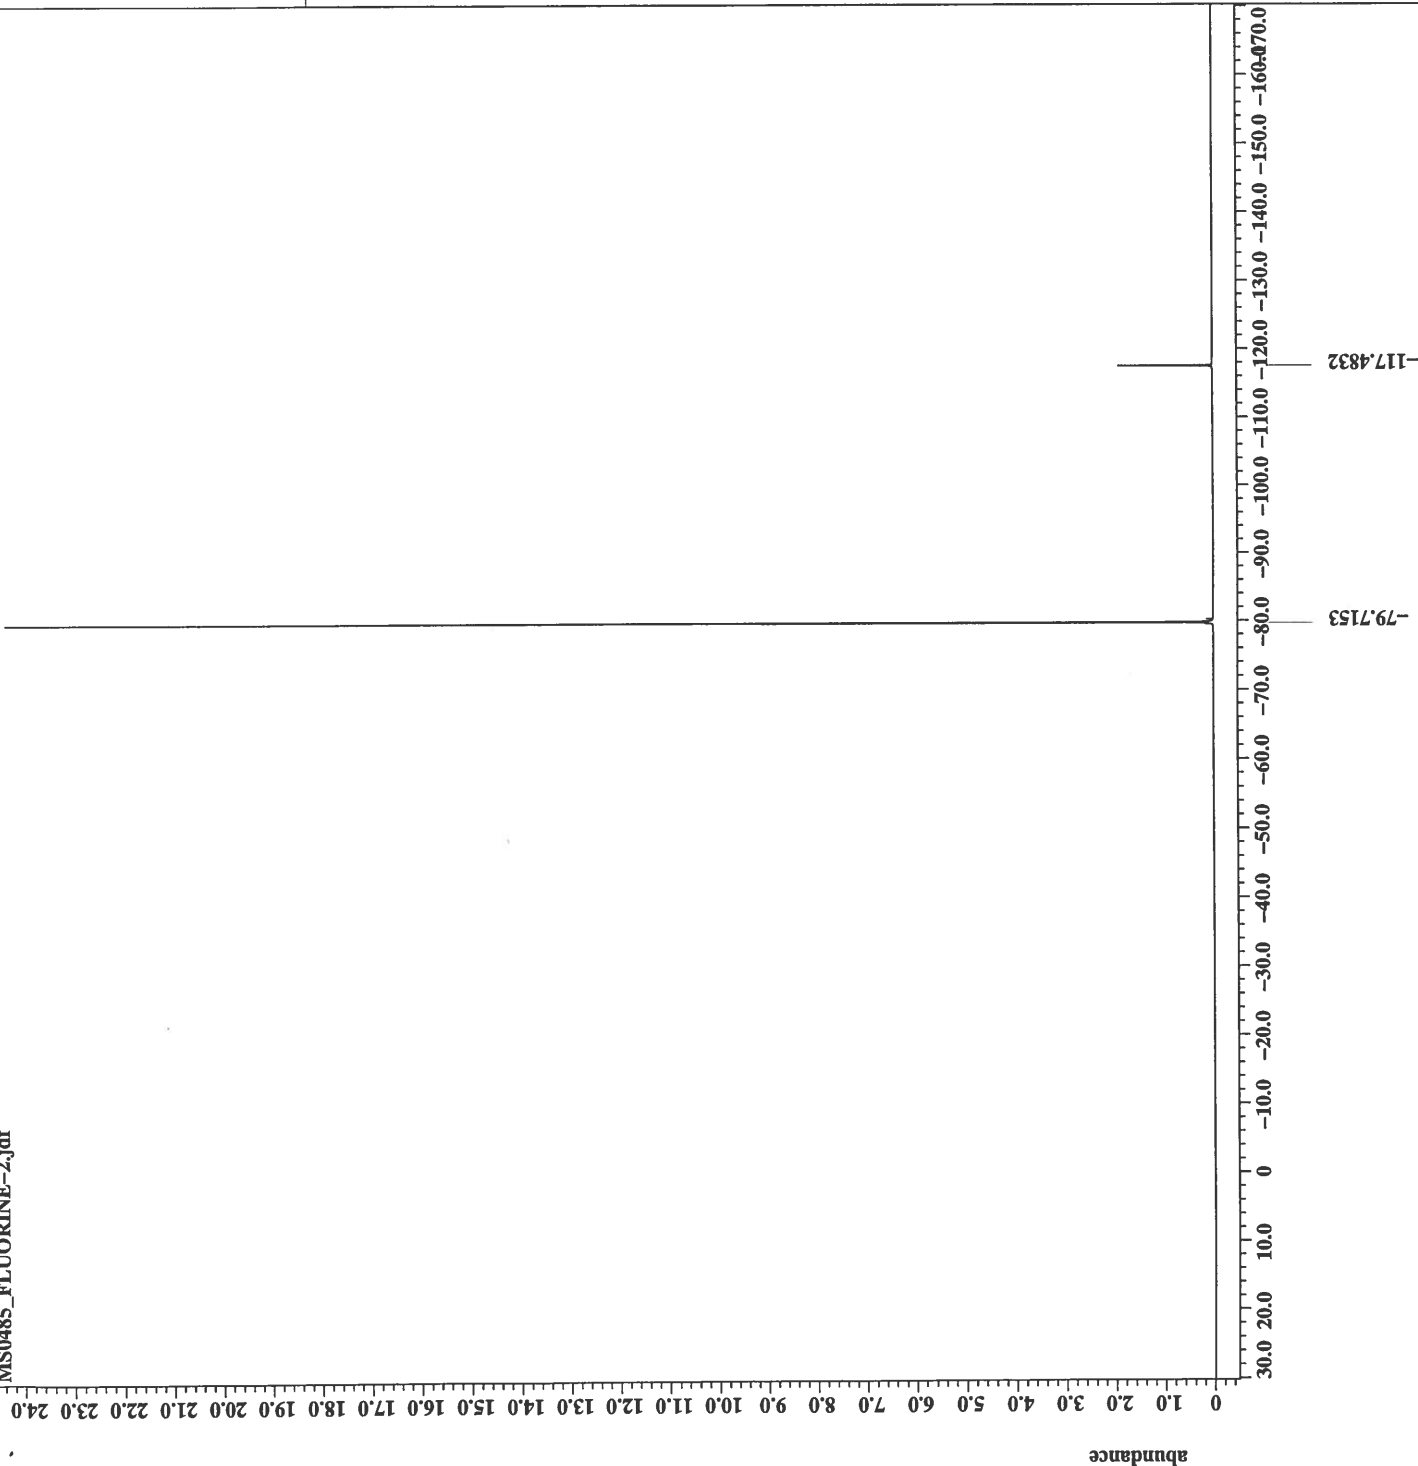



## checkCIF (basic structural check) running

Checking for embedded fcf data in CIF ...

Found embedded fcf data in CIF. Extracting fcf data from uploaded CIF, please wait . . . .

## checkCIF/PLATON (basic structural check)

Structure factors have been supplied for datablock(s) JD\_POP\_0m

THIS REPORT IS FOR GUIDANCE ONLY. IF USED AS PART OF A REVIEW PROCEDURE FOR PUBLICATION, IT SHOULD NOT REPLACE THE EXPERTISE OF AN EXPERIENCED CRYSTALLOGRAPHIC REFEREE.

No syntax errors found.  
Please wait while processing ....

[CIF dictionary](#)  
[Interpreting this report](#)

[Structure factor report](#)

## Datablock: JD\_POP\_0m

|                 |                                                 |                    |
|-----------------|-------------------------------------------------|--------------------|
| Bond precision: | C-C = 0.0046 Å                                  | Wavelength=1.54178 |
| Cell:           | a=18.1884(8)      b=9.1975(4)      c=18.6788(7) |                    |
|                 | alpha=90      beta=90      gamma=90             |                    |
| Temperature:    | 150 K                                           |                    |

  

|                        | Calculated                 | Reported                   |
|------------------------|----------------------------|----------------------------|
| Volume                 | 3124.7(2)                  | 3124.7(2)                  |
| Space group            | P c a 21                   | P c a 21                   |
| Hall group             | P 2c -2ac                  | P 2c -2ac                  |
| Moiety formula         | C30 H24 O P, C2 F6 N O4 S2 | C30 H24 O P, C2 F6 N O4 S2 |
| Sum formula            | C32 H24 F6 N O5 P S2       | C32 H24 F6 N O5 P S2       |
| Mr                     | 711.61                     | 711.61                     |
| Dx, g cm <sup>-3</sup> | 1.513                      | 1.513                      |
| Z                      | 4                          | 4                          |
| Mu (mm <sup>-1</sup> ) | 2.739                      | 2.739                      |
| F000                   | 1456.0                     | 1456.0                     |
| F000'                  | 1464.89                    |                            |
| h, k, lmax             | 23, 11, 23                 | 23, 11, 23                 |
| Nref                   | 6873 [ 3547]               | 5537                       |
| Tmin, Tmax             | 0.663, 0.826               | 0.535, 0.754               |
| Tmin'                  | 0.536                      |                            |

Correction method= # Reported T Limits: Tmin=0.535 Tmax=0.754  
AbsCorr = MULTI-SCAN

Data completeness= 1.56/0.81      Theta(max)= 80.721  
R(reflections)= 0.0303( 5354)      wR2(reflections)= 0.0813( 5537)  
S = 1.092      Npar= 561

The following ALERTS were generated. Each ALERT has the format

**test-name\_ALERT\_alert-type\_alert-level.**

Click on the hyperlinks for more details of the test.

### ● Alert level C

[PLAT089\\_ALERT\\_3\\_C](#) Poor Data / Parameter Ratio (Zmax < 18) ..... 6.24 Note  
[PLAT340\\_ALERT\\_3\\_C](#) Low Bond Precision on C-C Bonds ..... 0.0046 Ang.  
[PLAT911\\_ALERT\\_3\\_C](#) Missing FCF Refl Between Thmin & STh/L= 0.600 10 Report  
[PLAT913\\_ALERT\\_3\\_C](#) Missing # of Very Strong Reflections in FCF .... 5 Note  
[PLAT915\\_ALERT\\_3\\_C](#) No Flack x Check Done: Low Friedel Pair Coverage 61 %

### ● Alert level G

|                   |                                                  |       |        |
|-------------------|--------------------------------------------------|-------|--------|
| PLAT002_ALERT_2_G | Number of Distance or Angle Restraints on AtSite | 30    | Note   |
| PLAT003_ALERT_2_G | Number of Uiso or Uij Restrained non-H Atoms ... | 30    | Report |
| PLAT175_ALERT_4_G | The CIF-Embedded .res File Contains SAME Records | 1     | Report |
| PLAT178_ALERT_4_G | The CIF-Embedded .res File Contains SIMU Records | 1     | Report |
| PLAT302_ALERT_4_G | Anion/Solvent/Minor-Residue Disorder (Resd 2 )   | 100%  | Note   |
| PLAT302_ALERT_4_G | Anion/Solvent/Minor-Residue Disorder (Resd 3 )   | 100%  | Note   |
| PLAT304_ALERT_4_G | Non-Integer Number of Atoms in ..... Resd 2      | 11.74 | Check  |
| PLAT304_ALERT_4_G | Non-Integer Number of Atoms in ..... Resd 3      | 3.25  | Check  |
| PLAT432_ALERT_2_G | Short Inter X...Y Contact O4B ..C3               | 2.87  | Ang.   |
|                   | x,y,z = 1_555                                    | Check |        |
| PLAT811_ALERT_5_G | No ADDSYM Analysis: Too Many Excluded Atoms .... |       | ! Info |
| PLAT860_ALERT_3_G | Number of Least-Squares Restraints .....         | 532   | Note   |
| PLAT910_ALERT_3_G | Missing # of FCF Reflection(s) Below Theta(Min). | 2     | Note   |
| PLAT912_ALERT_4_G | Missing # of FCF Reflections Above STh/L= 0.600  | 33    | Note   |
| PLAT978_ALERT_2_G | Number C-C Bonds with Positive Residual Density. | 7     | Info   |

0 **ALERT level A** = Most likely a serious problem - resolve or explain  
0 **ALERT level B** = A potentially serious problem, consider carefully  
5 **ALERT level C** = Check. Ensure it is not caused by an omission or oversight  
14 **ALERT level G** = General information/check it is not something unexpected

0 ALERT type 1 CIF construction/syntax error, inconsistent or missing data  
4 ALERT type 2 Indicator that the structure model may be wrong or deficient  
7 ALERT type 3 Indicator that the structure quality may be low  
7 ALERT type 4 Improvement, methodology, query or suggestion  
1 ALERT type 5 Informative message, check

It is advisable to attempt to resolve as many as possible of the alerts in all categories. Often the minor alerts point to easily fixed oversights, errors and omissions in your CIF or refinement strategy, so attention to these fine details can be worthwhile. In order to resolve some of the more serious problems it may be necessary to carry out additional measurements or structure refinements. However, the purpose of your study may justify the reported deviations and the more serious of these should normally be commented upon in the discussion or experimental section of a paper or in the "special\_details" fields of the CIF. checkCIF was carefully designed to identify outliers and unusual parameters, but every test has its limitations and alerts that are not important in a particular case may appear. Conversely, the absence of alerts does not guarantee there are no aspects of the results needing attention. It is up to the individual to critically assess their own results and, if necessary, seek expert advice.

### Publication of your CIF in IUCr journals

A basic structural check has been run on your CIF. These basic checks will be run on all CIFs submitted for publication in IUCr journals (*Acta Crystallographica*, *Journal of Applied Crystallography*, *Journal of Synchrotron Radiation*); however, if you intend to submit to *Acta Crystallographica Section C* or *E* or *IUCrData*, you should make sure that **full publication checks** are run on the final version of your CIF prior to submission.

### Publication of your CIF in other journals

Please refer to the *Notes for Authors* of the relevant journal for any special instructions relating to CIF submission.

PLATON version of 03/05/2019; check.def file version of 29/04/2019

## Datablock JD\_POP\_0m - ellipsoid plot

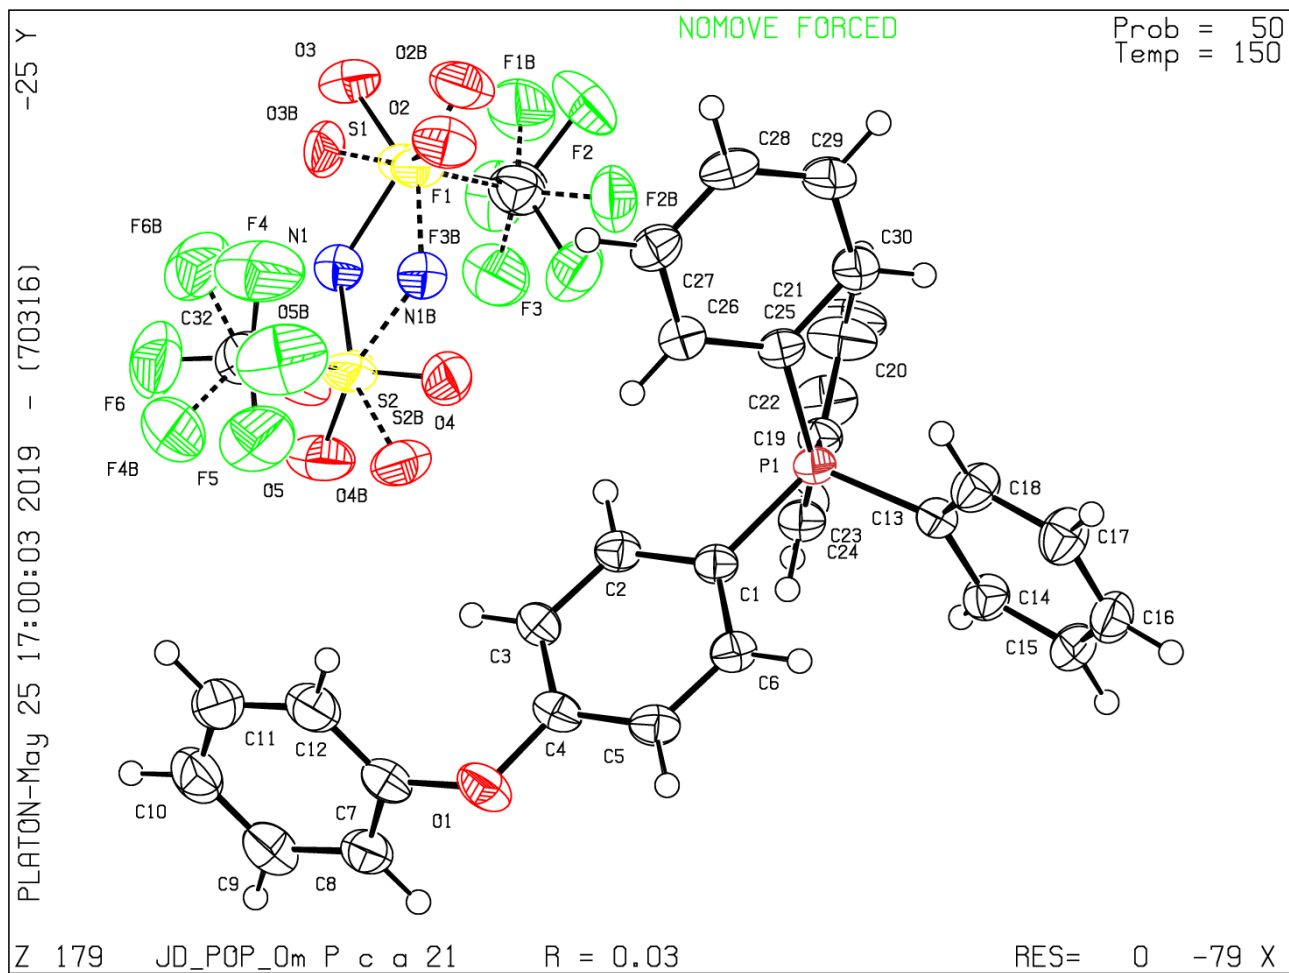

[Download CIF editor \(publCIF\) from the IUCr](#)  
[Download CIF editor \(enCIFer\) from the CCDC](#)  
[Test a new CIF entry](#)

# checkCIF (basic structural check) running

Checking for embedded fcf data in CIF ...

Found embedded fcf data in CIF. Extracting fcf data from uploaded CIF, please wait .....

## checkCIF/PLATON (basic structural check)

Structure factors have been supplied for datablock(s) JD\_POP\_MF\_0m\_5

THIS REPORT IS FOR GUIDANCE ONLY. IF USED AS PART OF A REVIEW PROCEDURE FOR PUBLICATION, IT SHOULD NOT REPLACE THE EXPERTISE OF AN EXPERIENCED CRYSTALLOGRAPHIC REFEREE.

No syntax errors found.

Please wait while processing ....

[CIF dictionary](#)

[Interpreting this report](#)

[Structure factor report](#)

### Datablock: JD\_POP\_MF\_0m\_5

|                 |                                                    |                    |
|-----------------|----------------------------------------------------|--------------------|
| Bond precision: | C-C = 0.0040 Å                                     | Wavelength=0.71073 |
| Cell:           | a=18.0534 (13)    b=19.0695 (14)    c=20.2712 (15) |                    |
|                 | alpha=90    beta=114.239 (3)    gamma=90           |                    |
| Temperature:    | 150 K                                              |                    |

  

|                        | Calculated                   | Reported                     |
|------------------------|------------------------------|------------------------------|
| Volume                 | 6363.5 (8)                   | 6363.5 (8)                   |
| Space group            | P 21/n                       | P 21/n                       |
| Hall group             | -P 2yn                       | -P 2yn                       |
| Moiety formula         | C30 H23 F O P, C2 F6 N O4 S2 | C30 H23 F O P, C2 F6 N O4 S2 |
| Sum formula            | C32 H23 F7 N O5 P S2         | C32 H23 F7 N O5 P S2         |
| Mr                     | 729.60                       | 729.60                       |
| Dx, g cm <sup>-3</sup> | 1.523                        | 1.523                        |
| Z                      | 8                            | 8                            |
| Mu (mm <sup>-1</sup> ) | 0.302                        | 0.302                        |
| F000                   | 2976.0                       | 2976.0                       |
| F000'                  | 2980.76                      |                              |
| h, k, lmax             | 26, 28, 29                   | 26, 28, 29                   |
| Nref                   | 21348                        | 20359                        |
| Tmin, Tmax             | 0.871, 0.962                 | 0.400, 0.746                 |
| Tmin'                  | 0.865                        |                              |

Correction method= # Reported T Limits: Tmin=0.400  
Tmax=0.746 AbsCorr = MULTI-SCAN

Data completeness= 0.954    Theta(max)= 31.592

R(reflections)= 0.0534 ( 11965)    wR2(reflections)= 0.1450 ( 20359)

S = 1.021    Npar= 1152

The following ALERTS were generated. Each ALERT has the format

**test-name\_ALERT\_alert-type\_alert-level.**

Click on the hyperlinks for more details of the test.

#### ● Alert level C

[PLAT241\\_ALERT\\_2\\_C](#) High 'MainMol' Ueq as Compared to Neighbors of  
[PLAT910\\_ALERT\\_3\\_C](#) Missing # of FCF Reflection(s) Below Theta(Min).

02 Check  
10 Note

|                                   |                                                  |       |           |
|-----------------------------------|--------------------------------------------------|-------|-----------|
| <a href="#">PLAT911_ALERT_3_C</a> | Missing FCF Refl Between Thmin & STh/L=          | 0.600 | 58 Report |
| <a href="#">PLAT913_ALERT_3_C</a> | Missing # of Very Strong Reflections in FCF .... |       | 7 Note    |

**Alert level G**

|                                   |                                                  |  |           |
|-----------------------------------|--------------------------------------------------|--|-----------|
| <a href="#">PLAT002_ALERT_2_G</a> | Number of Distance or Angle Restraints on AtSite |  | 68 Note   |
| <a href="#">PLAT003_ALERT_2_G</a> | Number of Uiso or Uij Restrained non-H Atoms ... |  | 45 Report |
| <a href="#">PLAT171_ALERT_4_G</a> | The CIF-Embedded .res File Contains EADP Records |  | 1 Report  |
| <a href="#">PLAT175_ALERT_4_G</a> | The CIF-Embedded .res File Contains SAME Records |  | 3 Report  |
| <a href="#">PLAT176_ALERT_4_G</a> | The CIF-Embedded .res File Contains SADI Records |  | 1 Report  |
| <a href="#">PLAT178_ALERT_4_G</a> | The CIF-Embedded .res File Contains SIMU Records |  | 1 Report  |
| <a href="#">PLAT230_ALERT_2_G</a> | Hirshfeld Test Diff for F1B --C5                 |  | 6.1 s.u.  |
| <a href="#">PLAT242_ALERT_2_G</a> | Low 'MainMol' Ueq as Compared to Neighbors of    |  | C61 Check |
| <a href="#">PLAT242_ALERT_2_G</a> | Low 'MainMol' Ueq as Compared to Neighbors of    |  | C62 Check |
| <a href="#">PLAT300_ALERT_4_G</a> | Atom Site Occupancy of S3 Constrained at         |  | 0.5 Check |

**And 14 other PLAT300 Alerts**

|                                   |                            |                |           |
|-----------------------------------|----------------------------|----------------|-----------|
| <a href="#">PLAT300_ALERT_4_G</a> | Atom Site Occupancy of S4  | Constrained at | 0.5 Check |
| <a href="#">PLAT300_ALERT_4_G</a> | Atom Site Occupancy of F9  | Constrained at | 0.5 Check |
| <a href="#">PLAT300_ALERT_4_G</a> | Atom Site Occupancy of F10 | Constrained at | 0.5 Check |
| <a href="#">PLAT300_ALERT_4_G</a> | Atom Site Occupancy of F11 | Constrained at | 0.5 Check |
| <a href="#">PLAT300_ALERT_4_G</a> | Atom Site Occupancy of F12 | Constrained at | 0.5 Check |
| <a href="#">PLAT300_ALERT_4_G</a> | Atom Site Occupancy of F13 | Constrained at | 0.5 Check |
| <a href="#">PLAT300_ALERT_4_G</a> | Atom Site Occupancy of F14 | Constrained at | 0.5 Check |
| <a href="#">PLAT300_ALERT_4_G</a> | Atom Site Occupancy of O7  | Constrained at | 0.5 Check |
| <a href="#">PLAT300_ALERT_4_G</a> | Atom Site Occupancy of O8  | Constrained at | 0.5 Check |
| <a href="#">PLAT300_ALERT_4_G</a> | Atom Site Occupancy of O9  | Constrained at | 0.5 Check |
| <a href="#">PLAT300_ALERT_4_G</a> | Atom Site Occupancy of O10 | Constrained at | 0.5 Check |
| <a href="#">PLAT300_ALERT_4_G</a> | Atom Site Occupancy of N2  | Constrained at | 0.5 Check |
| <a href="#">PLAT300_ALERT_4_G</a> | Atom Site Occupancy of C63 | Constrained at | 0.5 Check |
| <a href="#">PLAT300_ALERT_4_G</a> | Atom Site Occupancy of C64 | Constrained at | 0.5 Check |

|                                   |                                                |           |
|-----------------------------------|------------------------------------------------|-----------|
| <a href="#">PLAT301_ALERT_3_G</a> | Main Residue Disorder .....(Resd 1 )           | 3% Note   |
| <a href="#">PLAT301_ALERT_3_G</a> | Main Residue Disorder .....(Resd 2 )           | 3% Note   |
| <a href="#">PLAT302_ALERT_4_G</a> | Anion/Solvent/Minor-Residue Disorder (Resd 4 ) | 100% Note |

**And 2 other PLAT302 Alerts**

|                                   |                                                |           |
|-----------------------------------|------------------------------------------------|-----------|
| <a href="#">PLAT302_ALERT_4_G</a> | Anion/Solvent/Minor-Residue Disorder (Resd 5 ) | 100% Note |
| <a href="#">PLAT302_ALERT_4_G</a> | Anion/Solvent/Minor-Residue Disorder (Resd 6 ) | 100% Note |

|                                   |                                             |            |
|-----------------------------------|---------------------------------------------|------------|
| <a href="#">PLAT304_ALERT_4_G</a> | Non-Integer Number of Atoms in ..... Resd 4 | 7.50 Check |
|-----------------------------------|---------------------------------------------|------------|

**And 2 other PLAT304 Alerts**

|                                   |                                             |            |
|-----------------------------------|---------------------------------------------|------------|
| <a href="#">PLAT304_ALERT_4_G</a> | Non-Integer Number of Atoms in ..... Resd 5 | 4.80 Check |
| <a href="#">PLAT304_ALERT_4_G</a> | Non-Integer Number of Atoms in ..... Resd 6 | 2.70 Check |

|                                   |                                                  |                 |
|-----------------------------------|--------------------------------------------------|-----------------|
| <a href="#">PLAT432_ALERT_2_G</a> | Short Inter X...Y Contact O12B ..C6              | 2.90 Ang.       |
|                                   | x,y,z =                                          | 1_555 Check     |
| <a href="#">PLAT789_ALERT_4_G</a> | Atoms with Negative _atom_site_disorder_group #  | 45 Check        |
| <a href="#">PLAT860_ALERT_3_G</a> | Number of Least-Squares Restraints .....         | 786 Note        |
| <a href="#">PLAT870_ALERT_4_G</a> | ALERTS Related to Twinning Effects Suppressed .. | ! Info          |
| <a href="#">PLAT912_ALERT_4_G</a> | Missing # of FCF Reflections Above STh/L=        | 0.600 1245 Note |
| <a href="#">PLAT931_ALERT_5_G</a> | CIFcalcFCF Twin Law ( 0 0 1) Est.d BASF          | 0.16 Check      |
| <a href="#">PLAT933_ALERT_2_G</a> | Number of OMIT Records in Embedded .res File ... | 3 Note          |

- 0 **ALERT level A** = Most likely a serious problem - resolve or explain  
0 **ALERT level B** = A potentially serious problem, consider carefully  
4 **ALERT level C** = Check. Ensure it is not caused by an omission or oversight  
39 **ALERT level G** = General information/check it is not something unexpected

- 0 ALERT type 1 CIF construction/syntax error, inconsistent or missing data  
8 ALERT type 2 Indicator that the structure model may be wrong or deficient  
6 ALERT type 3 Indicator that the structure quality may be low  
28 ALERT type 4 Improvement, methodology, query or suggestion  
1 ALERT type 5 Informative message, check

It is advisable to attempt to resolve as many as possible of the alerts in all categories. Often the minor alerts point to easily fixed oversights, errors and omissions in your CIF or refinement strategy, so attention to these fine details can be worthwhile. In order to resolve some of the more serious problems it may be necessary to carry out additional measurements or structure refinements. However, the purpose of your study may justify the reported deviations and the more serious of these should

normally be commented upon in the discussion or experimental section of a paper or in the "special\_details" fields of the CIF. checkCIF was carefully designed to identify outliers and unusual parameters, but every test has its limitations and alerts that are not important in a particular case may appear. Conversely, the absence of alerts does not guarantee there are no aspects of the results needing attention. It is up to the individual to critically assess their own results and, if necessary, seek expert advice.

### Publication of your CIF in IUCr journals

A basic structural check has been run on your CIF. These basic checks will be run on all CIFs submitted for publication in IUCr journals (*Acta Crystallographica*, *Journal of Applied Crystallography*, *Journal of Synchrotron Radiation*); however, if you intend to submit to *Acta Crystallographica Section C* or *E* or *IUCrData*, you should make sure that [full publication checks](#) are run on the final version of your CIF prior to submission.

### Publication of your CIF in other journals

Please refer to the *Notes for Authors* of the relevant journal for any special instructions relating to CIF submission.

---

PLATON version of 18/02/2019; check.def file version of 18/02/2019

### Datablock JD\_POP\_MF\_0m\_5 - ellipsoid plot

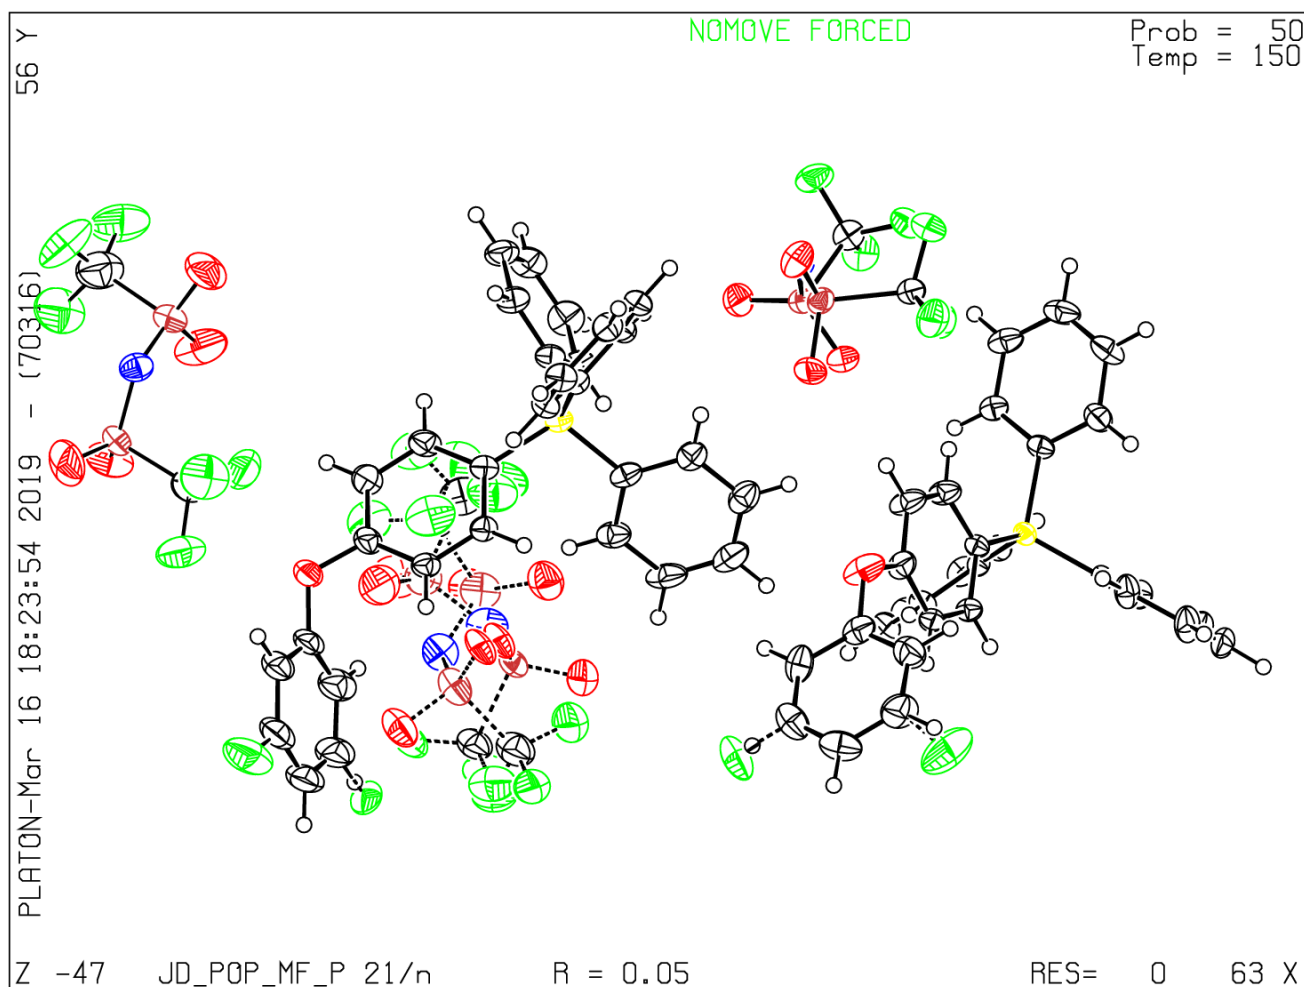

[Download CIF editor \(publCIF\) from the IUCr](#)  
[Download CIF editor \(enCIFer\) from the CCDC](#)  
[Test a new CIF entry](#)

# checkCIF (basic structural check) running

---

Checking for embedded fcf data in CIF ...

Found embedded fcf data in CIF. Extracting fcf data from uploaded CIF, please wait .....

## checkCIF/PLATON (basic structural check)

---

Structure factors have been supplied for datablock(s) JD\_POP\_OF\_0m

THIS REPORT IS FOR GUIDANCE ONLY. IF USED AS PART OF A REVIEW PROCEDURE FOR PUBLICATION, IT SHOULD NOT REPLACE THE EXPERTISE OF AN EXPERIENCED CRYSTALLOGRAPHIC REFEREE.

No syntax errors found.

Please wait while processing ....

[CIF dictionary](#)

[Interpreting this report](#)

[Structure factor report](#)

### Datablock: JD\_POP\_OF\_0m

---

|                    |                                                 |                    |
|--------------------|-------------------------------------------------|--------------------|
| Bond precision:    | C-C = 0.0026 Å                                  | Wavelength=0.71073 |
| Cell:              | a=18.0015(14)    b=18.7263(15)    c=18.8837(16) |                    |
|                    | alpha=90        beta=90        gamma=90         |                    |
| Temperature: 150 K |                                                 |                    |

  

|                        | Calculated                   | Reported                     |
|------------------------|------------------------------|------------------------------|
| Volume                 | 6365.7(9)                    | 6365.7(9)                    |
| Space group            | P b c a                      | P b c a                      |
| Hall group             | -P 2ac 2ab                   | -P 2ac 2ab                   |
| Moiety formula         | C30 H23 F O P, C2 F6 N O4 S2 | C30 H23 F O P, C2 F6 N O4 S2 |
| Sum formula            | C32 H23 F7 N O5 P S2         | C32 H23 F7 N O5 P S2         |
| Mr                     | 729.60                       | 729.60                       |
| Dx, g cm <sup>-3</sup> | 1.523                        | 1.523                        |
| Z                      | 8                            | 8                            |
| Mu (mm <sup>-1</sup> ) | 0.301                        | 0.301                        |
| F000                   | 2976.0                       | 2976.0                       |
| F000'                  | 2980.76                      |                              |
| h, k, lmax             | 27, 28, 29                   | 27, 28, 29                   |
| Nref                   | 12223                        | 12152                        |
| Tmin, Tmax             | 0.855, 0.939                 | 0.689, 0.747                 |
| Tmin'                  | 0.855                        |                              |

Correction method= # Reported T Limits: Tmin=0.689  
Tmax=0.747 AbsCorr = MULTI-SCAN

Data completeness= 0.994        Theta(max)= 33.230

R(reflections)= 0.0579( 8861)        wR2(reflections)= 0.1854( 12152)

S = 1.046        Npar= 579

---



The following ALERTS were generated. Each ALERT has the format

**test-name\_ALERT\_alert-type\_alert-level.**

Click on the hyperlinks for more details of the test.

### Alert level B

[PLAT430\\_ALERT\\_2\\_B](#) Short Inter D...A Contact O1 ..01 . 2.76 Ang.  
1-x,-y,1-z = 5\_656 Check

### Alert level C

[PLAT905\\_ALERT\\_3\\_C](#) Negative K value in the Analysis of Variance ... -2.090 Report  
[PLAT911\\_ALERT\\_3\\_C](#) Missing FCF Refl Between Thmin & STh/L= 0.600 4 Report

### Alert level G

[PLAT002\\_ALERT\\_2\\_G](#) Number of Distance or Angle Restraints on AtSite 30 Note  
[PLAT003\\_ALERT\\_2\\_G](#) Number of Uiso or Uij Restrained non-H Atoms ... 30 Report  
[PLAT175\\_ALERT\\_4\\_G](#) The CIF-Embedded .res File Contains SAME Records 1 Report  
[PLAT178\\_ALERT\\_4\\_G](#) The CIF-Embedded .res File Contains SIMU Records 1 Report  
[PLAT230\\_ALERT\\_2\\_G](#) Hirshfeld Test Diff for F1 --C2 6.4 s.u.  
[PLAT301\\_ALERT\\_3\\_G](#) Main Residue Disorder .....(Resd 1 ) 3% Note  
[PLAT302\\_ALERT\\_4\\_G](#) Anion/Solvent/Minor-Residue Disorder (Resd 2 ) 100% Note  
[PLAT302\\_ALERT\\_4\\_G](#) Anion/Solvent/Minor-Residue Disorder (Resd 3 ) 100% Note  
[PLAT304\\_ALERT\\_4\\_G](#) Non-Integer Number of Atoms in ..... Resd 2 12.68 Check  
[PLAT304\\_ALERT\\_4\\_G](#) Non-Integer Number of Atoms in ..... Resd 3 2.32 Check  
[PLAT432\\_ALERT\\_2\\_G](#) Short Inter X...Y Contact O5B ..C16 2.95 Ang.  
1/2+x,y,1/2-z = 6\_656 Check  
[PLAT811\\_ALERT\\_5\\_G](#) No ADDSYM Analysis: Too Many Excluded Atoms .... ! Info  
[PLAT860\\_ALERT\\_3\\_G](#) Number of Least-Squares Restraints ..... 513 Note  
[PLAT910\\_ALERT\\_3\\_G](#) Missing # of FCF Reflection(s) Below Theta(Min). 1 Note  
[PLAT912\\_ALERT\\_4\\_G](#) Missing # of FCF Reflections Above STh/L= 0.600 67 Note  
[PLAT913\\_ALERT\\_3\\_G](#) Missing # of Very Strong Reflections in FCF .... 3 Note  
[PLAT978\\_ALERT\\_2\\_G](#) Number C-C Bonds with Positive Residual Density. 9 Info

- 0 **ALERT level A** = Most likely a serious problem - resolve or explain  
1 **ALERT level B** = A potentially serious problem, consider carefully  
2 **ALERT level C** = Check. Ensure it is not caused by an omission or oversight  
17 **ALERT level G** = General information/check it is not something unexpected
- 0 ALERT type 1 CIF construction/syntax error, inconsistent or missing data  
6 ALERT type 2 Indicator that the structure model may be wrong or deficient  
6 ALERT type 3 Indicator that the structure quality may be low  
7 ALERT type 4 Improvement, methodology, query or suggestion  
1 ALERT type 5 Informative message, check

It is advisable to attempt to resolve as many as possible of the alerts in all categories. Often the minor alerts point to easily fixed oversights, errors and omissions in your CIF or refinement strategy, so attention to these fine details can be worthwhile. In order to resolve some of the more serious problems it may be necessary to carry out additional measurements or structure refinements. However, the purpose of your study may justify the reported deviations and the more serious of these should normally be commented upon in the discussion or experimental section of a paper or in the "special\_details" fields of the CIF. checkCIF was carefully designed to identify outliers and unusual parameters, but every test has its limitations and alerts that are not important in a particular case may appear. Conversely, the absence of alerts does not guarantee there are no aspects of the results needing attention. It is up to the individual to critically assess their own results and, if necessary, seek expert advice.

### Publication of your CIF in IUCr journals

A basic structural check has been run on your CIF. These basic checks will be run on all CIFs submitted for publication in IUCr journals (*Acta Crystallographica*, *Journal of Applied Crystallography*, *Journal of Synchrotron Radiation*); however, if you intend to submit to *Acta Crystallographica Section C* or *E* or *IUCrData*, you should make sure that [full publication checks](#) are run on the final version of your CIF prior to submission.

### Publication of your CIF in other journals

Please refer to the *Notes for Authors* of the relevant journal for any special instructions relating to CIF submission.

PLATON version of 18/02/2019; check.def file version of 18/02/2019

### Datablock JD\_POP\_OF\_0m - ellipsoid plot

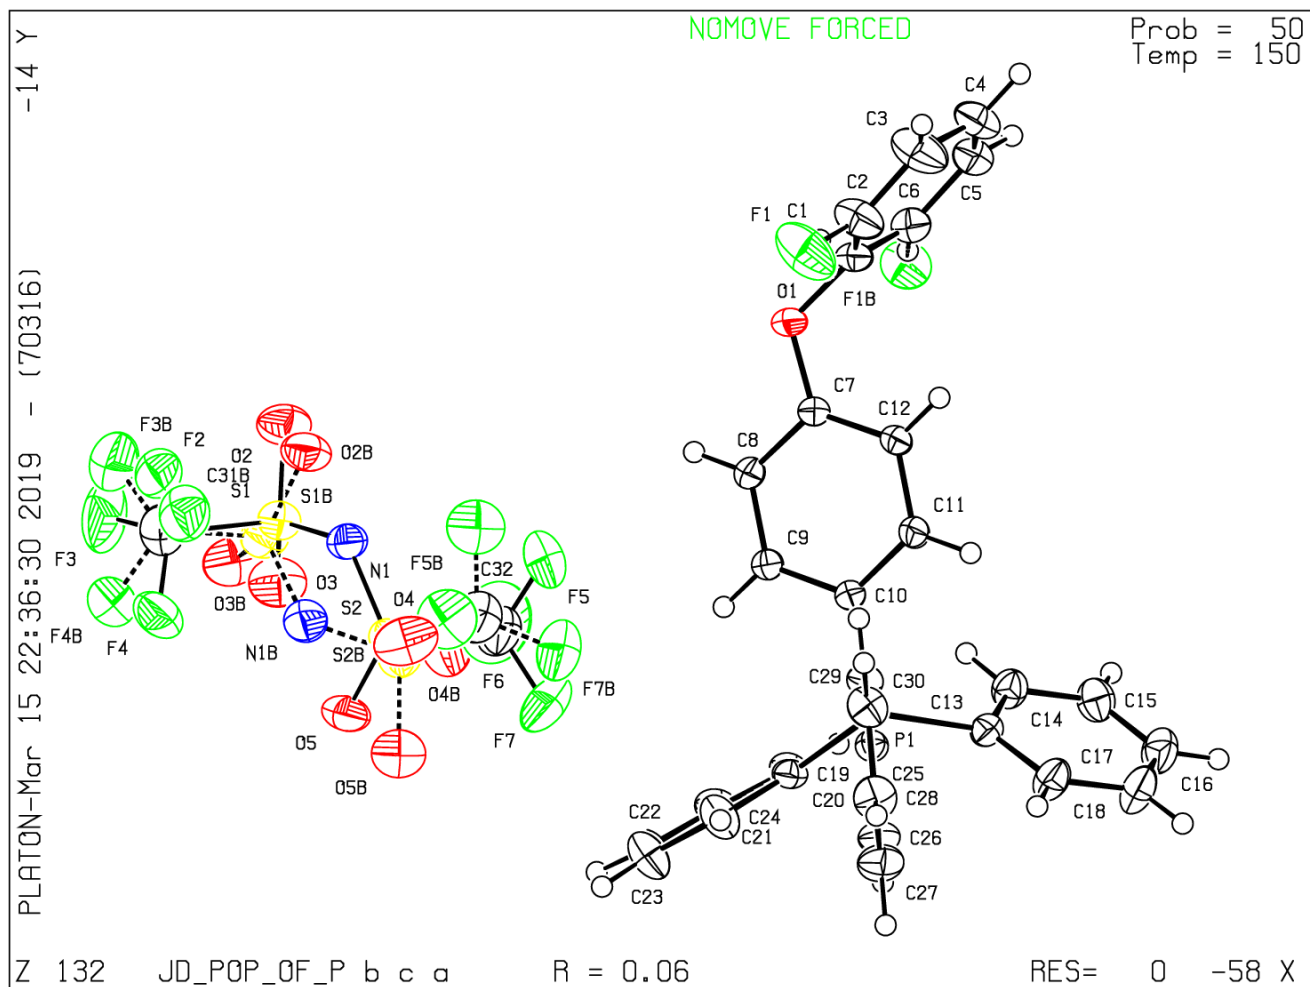

[Download CIF editor \(publCIF\) from the IUCr](#)  
[Download CIF editor \(enCIFer\) from the CCDC](#)  
[Test a new CIF entry](#)

# checkCIF (basic structural check) running

Checking for embedded fcf data in CIF ...

Found embedded fcf data in CIF. Extracting fcf data from uploaded CIF, please wait .....

## checkCIF/PLATON (basic structural check)

Structure factors have been supplied for datablock(s) JD\_POP\_PF\_0m

THIS REPORT IS FOR GUIDANCE ONLY. IF USED AS PART OF A REVIEW PROCEDURE FOR PUBLICATION, IT SHOULD NOT REPLACE THE EXPERTISE OF AN EXPERIENCED CRYSTALLOGRAPHIC REFEREE.

No syntax errors found.

Please wait while processing ....

[CIF dictionary](#)

[Interpreting this report](#)

[Structure factor report](#)

### Datablock: JD\_POP\_PF\_0m

|                 |                                                        |                    |
|-----------------|--------------------------------------------------------|--------------------|
| Bond precision: | C-C = 0.0024 Å                                         | Wavelength=0.71073 |
| Cell:           | a=9.5981(8)    b=13.6324(11)    c=22.2398(18)          |                    |
|                 | alpha=102.938(3)    beta=92.159(3)    gamma=109.211(3) |                    |
| Temperature:    | 150 K                                                  |                    |

  

|                | Calculated                 | Reported                   |
|----------------|----------------------------|----------------------------|
| Volume         | 2658.5(4)                  | 2658.5(4)                  |
| Space group    | P -1                       | P -1                       |
| Hall group     | -P 1                       | -P 1                       |
| Moiety formula | C24 H19 F P, C2 F6 N O4 S2 | C24 H19 F P, C2 F6 N O4 S2 |
| Sum formula    | C26 H19 F7 N O4 P S2       | C26 H19 F7 N O4 P S2       |
| Mr             | 637.50                     | 637.51                     |
| Dx, g cm-3     | 1.593                      | 1.593                      |
| Z              | 4                          | 4                          |
| Mu (mm-1)      | 0.345                      | 0.345                      |
| F000           | 1296.0                     | 1296.0                     |
| F000'          | 1298.27                    |                            |
| h, k, lmax     | 13, 19, 32                 | 13, 19, 32                 |
| Nref           | 17132                      | 16986                      |
| Tmin, Tmax     | 0.921, 0.973               | 0.694, 0.746               |
| Tmin'          | 0.921                      |                            |

Correction method= # Reported T Limits: Tmin=0.694  
Tmax=0.746 AbsCorr = MULTI-SCAN

Data completeness= 0.991    Theta(max)= 31.139

R(reflections)= 0.0440( 12700)    wR2(reflections)= 0.1276( 16986)

S = 1.035    Npar= 1073

The following ALERTS were generated. Each ALERT has the format

**test-name\_ALERT\_alert-type\_alert-level.**

Click on the hyperlinks for more details of the test.

#### ● Alert level C

|                                   |                                                 |             |
|-----------------------------------|-------------------------------------------------|-------------|
| <a href="#">PLAT214_ALERT_2_C</a> | Atom C51B    (Anion/Solvent) ADP max/min Ratio  | 4.3 oblate  |
| <a href="#">PLAT906_ALERT_3_C</a> | Large K Value in the Analysis of Variance ..... | 2.746 Check |

|                                   |                                                  |           |
|-----------------------------------|--------------------------------------------------|-----------|
| <a href="#">PLAT910_ALERT_3_C</a> | Missing # of FCF Reflection(s) Below Theta(Min). | 6 Note    |
| <a href="#">PLAT911_ALERT_3_C</a> | Missing FCF Refl Between Thmin & STh/L= 0.600    | 36 Report |

**Alert level G**

|                                   |                                                  |              |
|-----------------------------------|--------------------------------------------------|--------------|
| <a href="#">PLAT002_ALERT_2_G</a> | Number of Distance or Angle Restraints on AtSite | 76 Note      |
| <a href="#">PLAT003_ALERT_2_G</a> | Number of Uiso or Uij Restrained non-H Atoms ... | 60 Report    |
| <a href="#">PLAT154_ALERT_1_G</a> | The s.u.'s on the Cell Angles are Equal ..(Note) | 0.003 Degree |
| <a href="#">PLAT175_ALERT_4_G</a> | The CIF-Embedded .res File Contains SAME Records | 3 Report     |
| <a href="#">PLAT176_ALERT_4_G</a> | The CIF-Embedded .res File Contains SADI Records | 1 Report     |
| <a href="#">PLAT178_ALERT_4_G</a> | The CIF-Embedded .res File Contains SIMU Records | 2 Report     |
| <a href="#">PLAT230_ALERT_2_G</a> | Hirshfeld Test Diff for F2 --C28 .               | 5.1 s.u.     |
| <a href="#">PLAT230_ALERT_2_G</a> | Hirshfeld Test Diff for S3 --C51 .               | 6.2 s.u.     |
| <a href="#">PLAT301_ALERT_3_G</a> | Main Residue Disorder .....(Resd 1 )             | 4% Note      |
| <a href="#">PLAT301_ALERT_3_G</a> | Main Residue Disorder .....(Resd 2 )             | 4% Note      |
| <a href="#">PLAT302_ALERT_4_G</a> | Anion/Solvent/Minor-Residue Disorder (Resd 3 )   | 100% Note    |

**And 3 other PLAT302 Alerts**

|                                   |                                                |           |
|-----------------------------------|------------------------------------------------|-----------|
| <a href="#">PLAT302_ALERT_4_G</a> | Anion/Solvent/Minor-Residue Disorder (Resd 4 ) | 100% Note |
| <a href="#">PLAT302_ALERT_4_G</a> | Anion/Solvent/Minor-Residue Disorder (Resd 5 ) | 100% Note |
| <a href="#">PLAT302_ALERT_4_G</a> | Anion/Solvent/Minor-Residue Disorder (Resd 6 ) | 100% Note |

|                                   |                                             |             |
|-----------------------------------|---------------------------------------------|-------------|
| <a href="#">PLAT304_ALERT_4_G</a> | Non-Integer Number of Atoms in ..... Resd 3 | 14.25 Check |
|-----------------------------------|---------------------------------------------|-------------|

**And 3 other PLAT304 Alerts**

|                                   |                                             |             |
|-----------------------------------|---------------------------------------------|-------------|
| <a href="#">PLAT304_ALERT_4_G</a> | Non-Integer Number of Atoms in ..... Resd 4 | 13.05 Check |
| <a href="#">PLAT304_ALERT_4_G</a> | Non-Integer Number of Atoms in ..... Resd 5 | 0.75 Check  |
| <a href="#">PLAT304_ALERT_4_G</a> | Non-Integer Number of Atoms in ..... Resd 6 | 1.95 Check  |

|                                   |                                     |             |
|-----------------------------------|-------------------------------------|-------------|
| <a href="#">PLAT432_ALERT_2_G</a> | Short Inter X...Y Contact O3 ..C39  | 3.01 Ang.   |
|                                   | x,y,z =                             | 1_555 Check |
| <a href="#">PLAT432_ALERT_2_G</a> | Short Inter X...Y Contact F1C ..C3  | 2.93 Ang.   |
|                                   | -1+x,y,z =                          | 1_455 Check |
| <a href="#">PLAT432_ALERT_2_G</a> | Short Inter X...Y Contact F5B ..C39 | 2.89 Ang.   |
|                                   | 2-x,2-y,1-z =                       | 2_776 Check |
| <a href="#">PLAT432_ALERT_2_G</a> | Short Inter X...Y Contact O1B ..C11 | 2.82 Ang.   |
|                                   | 1-x,1-y,1-z =                       | 2_666 Check |
| <a href="#">PLAT432_ALERT_2_G</a> | Short Inter X...Y Contact O1B ..C12 | 2.90 Ang.   |
|                                   | 1-x,1-y,1-z =                       | 2_666 Check |
| <a href="#">PLAT432_ALERT_2_G</a> | Short Inter X...Y Contact O2B ..C9  | 2.91 Ang.   |
|                                   | 2-x,1-y,1-z =                       | 2_766 Check |
| <a href="#">PLAT432_ALERT_2_G</a> | Short Inter X...Y Contact O5B ..C47 | 2.85 Ang.   |
|                                   | 1+x,y,z =                           | 1_655 Check |
| <a href="#">PLAT432_ALERT_2_G</a> | Short Inter X...Y Contact O6B ..C26 | 2.89 Ang.   |
|                                   | 1-x,1-y,-z =                        | 2_665 Check |

|                                   |                                                  |           |
|-----------------------------------|--------------------------------------------------|-----------|
| <a href="#">PLAT811_ALERT_5_G</a> | No ADDSYM Analysis: Too Many Excluded Atoms .... | ! Info    |
| <a href="#">PLAT860_ALERT_3_G</a> | Number of Least-Squares Restraints .....         | 1242 Note |
| <a href="#">PLAT912_ALERT_4_G</a> | Missing # of FCF Reflections Above STh/L= 0.600  | 103 Note  |
| <a href="#">PLAT913_ALERT_3_G</a> | Missing # of Very Strong Reflections in FCF .... | 3 Note    |
| <a href="#">PLAT933_ALERT_2_G</a> | Number of OMIT Records in Embedded .res File ... | 3 Note    |
| <a href="#">PLAT978_ALERT_2_G</a> | Number C-C Bonds with Positive Residual Density. | 12 Info   |

0 **ALERT level A** = Most likely a serious problem - resolve or explain  
0 **ALERT level B** = A potentially serious problem, consider carefully  
4 **ALERT level C** = Check. Ensure it is not caused by an omission or oversight  
32 **ALERT level G** = General information/check it is not something unexpected

1 ALERT type 1 CIF construction/syntax error, inconsistent or missing data  
15 ALERT type 2 Indicator that the structure model may be wrong or deficient  
7 ALERT type 3 Indicator that the structure quality may be low  
12 ALERT type 4 Improvement, methodology, query or suggestion  
1 ALERT type 5 Informative message, check

It is advisable to attempt to resolve as many as possible of the alerts in all categories. Often the minor alerts point to easily fixed oversights, errors and omissions in your CIF or refinement strategy, so attention to these fine details can be worthwhile. In order to resolve some of the more serious problems it may be necessary to carry out additional measurements or structure refinements. However, the purpose of your study may justify the reported deviations and the more serious of these should normally be commented upon in the discussion or experimental section of a paper or in the "special\_details" fields of the CIF. checkCIF was carefully designed to identify outliers and unusual

parameters, but every test has its limitations and alerts that are not important in a particular case may appear. Conversely, the absence of alerts does not guarantee there are no aspects of the results needing attention. It is up to the individual to critically assess their own results and, if necessary, seek expert advice.

### Publication of your CIF in IUCr journals

A basic structural check has been run on your CIF. These basic checks will be run on all CIFs submitted for publication in IUCr journals (*Acta Crystallographica*, *Journal of Applied Crystallography*, *Journal of Synchrotron Radiation*); however, if you intend to submit to *Acta Crystallographica Section C* or *E* or *IUCrData*, you should make sure that [full publication checks](#) are run on the final version of your CIF prior to submission.

### Publication of your CIF in other journals

Please refer to the *Notes for Authors* of the relevant journal for any special instructions relating to CIF submission.

---

PLATON version of 18/02/2019; check.def file version of 18/02/2019

### Datablock JD\_POP\_PF\_0m - ellipsoid plot

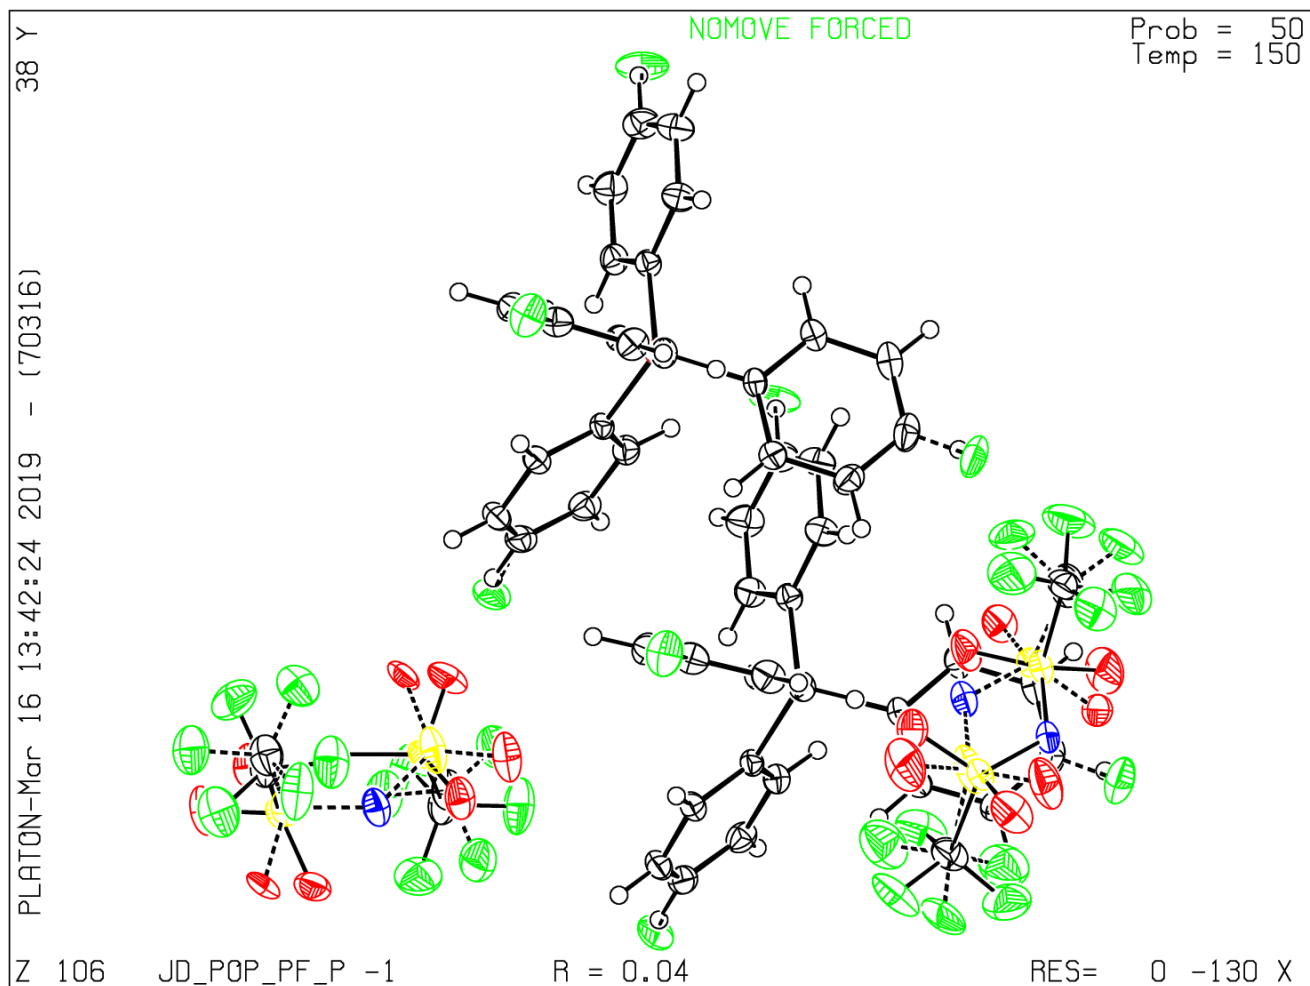

[Test a new CIF entry](#)

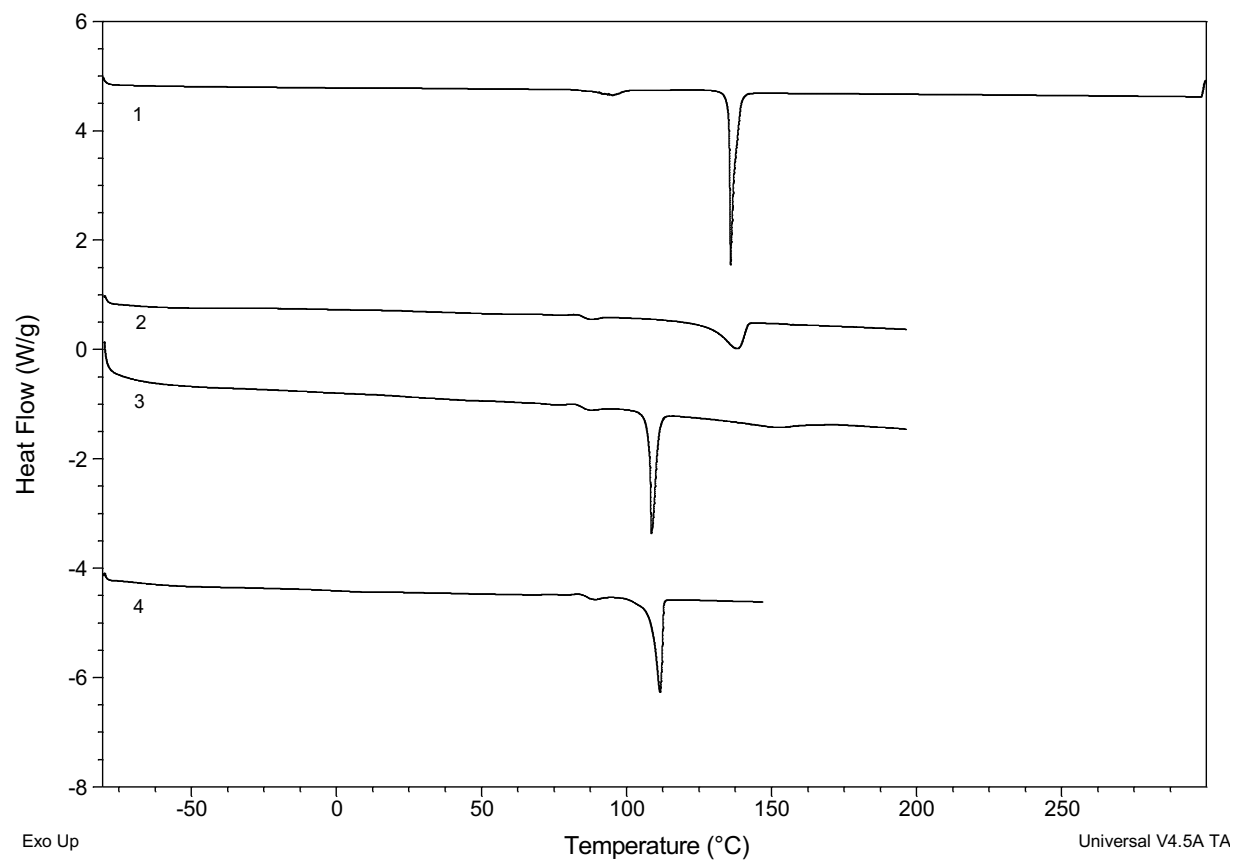

Figure S1: Representative DSC scans for compounds **1-4**.

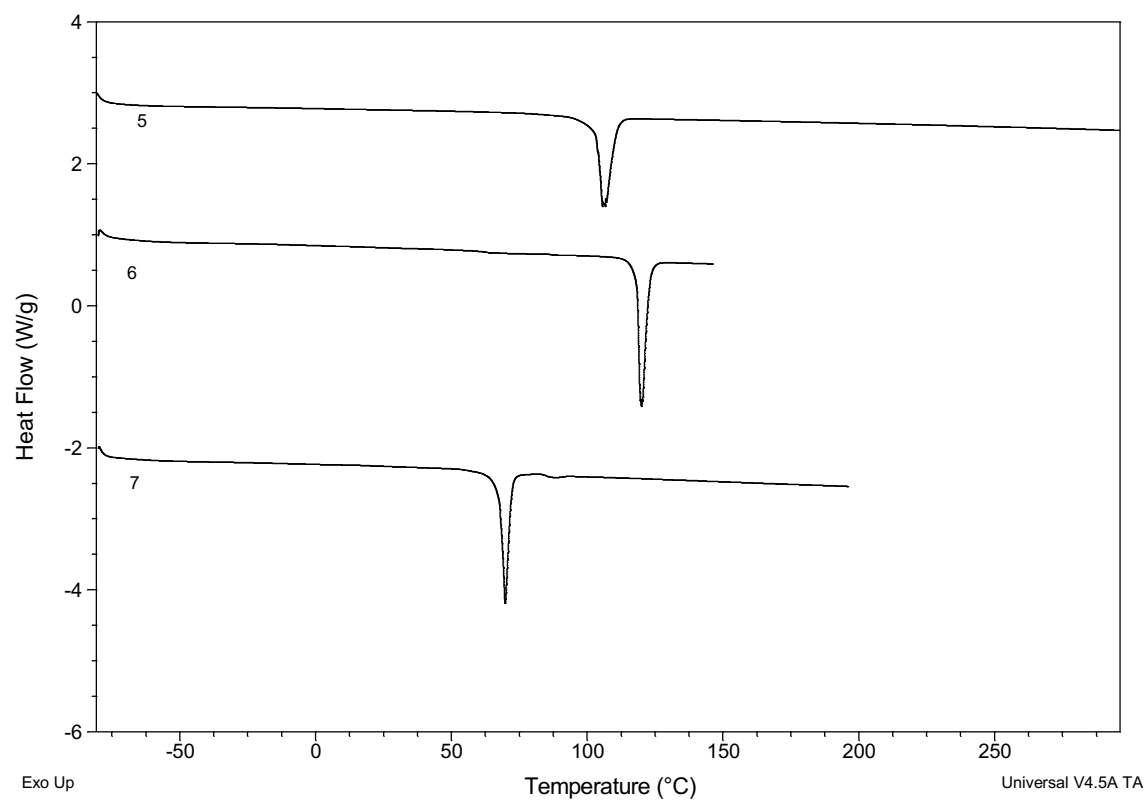

Figure S2: Representative DSC scans for compounds **5-7**.



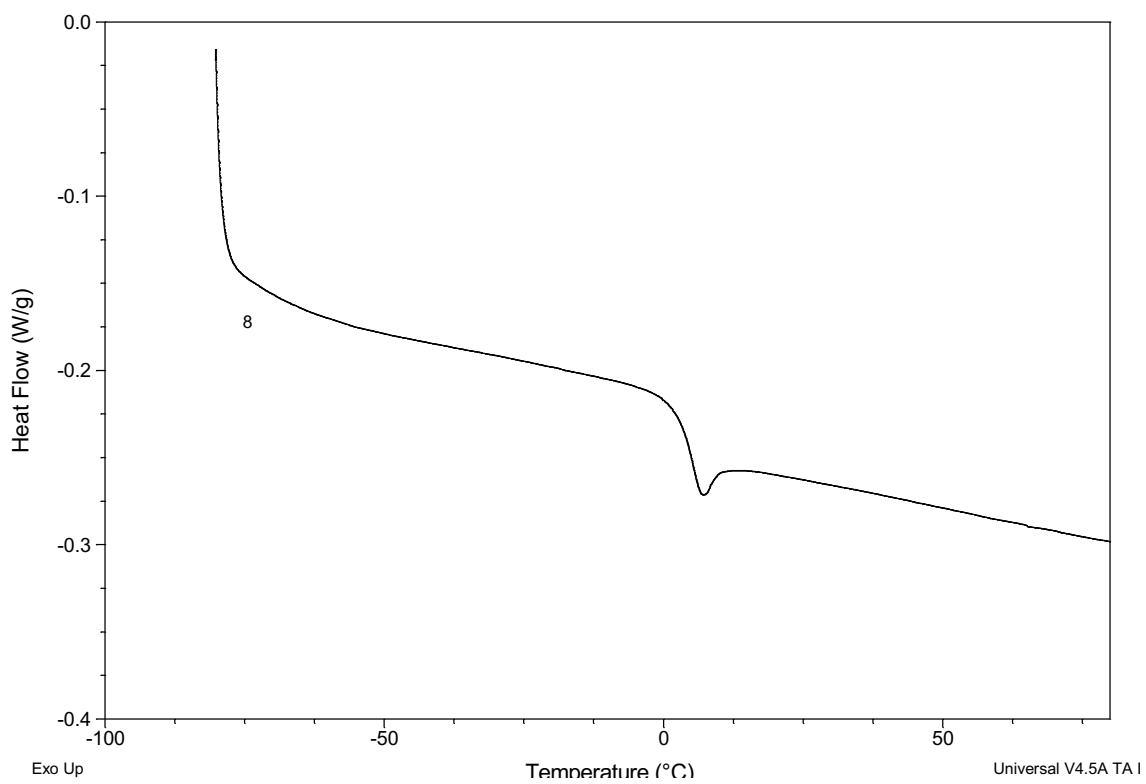

Figure S3: Representative DSC scan for compound **8**, which exhibits a weak glass transition.

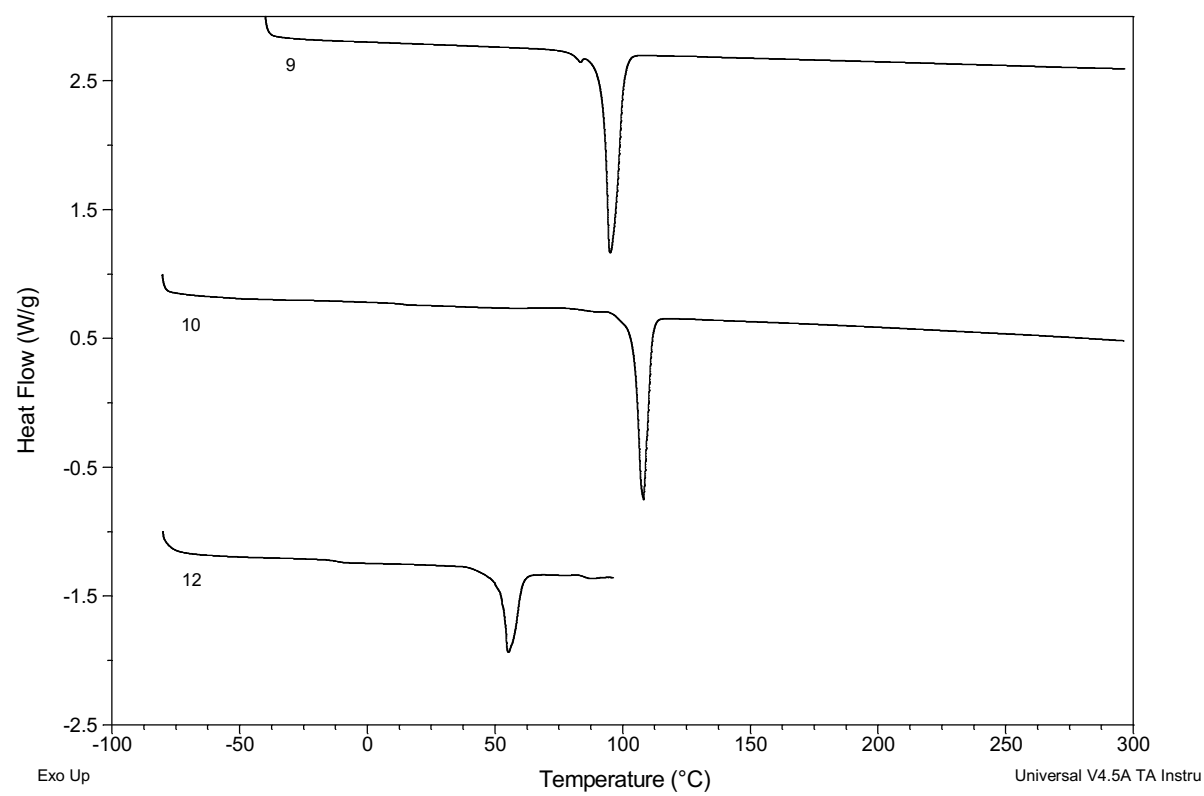

Figure S4: Representative DSC scans for compounds **9,10** and **12**.

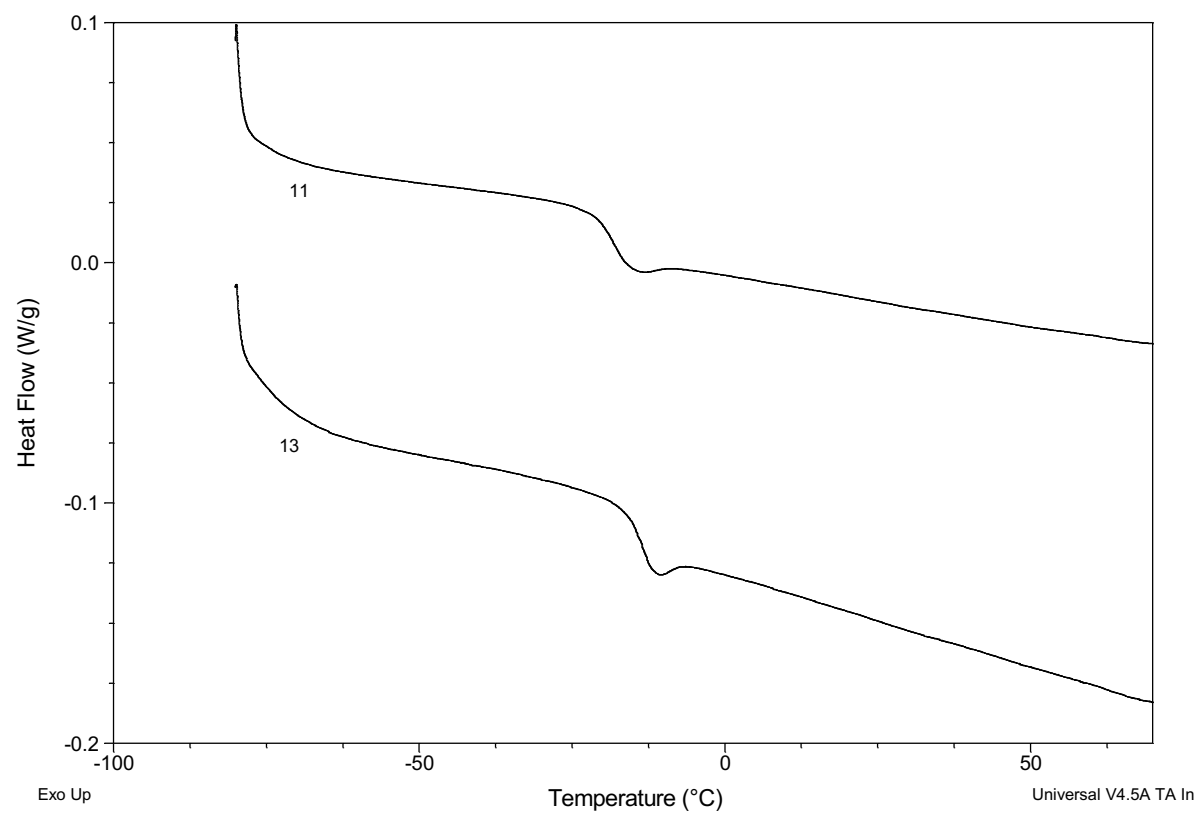

Figure S5: Representative DSC scans for compounds **11** and **13**, which exhibit weak glass transitions.

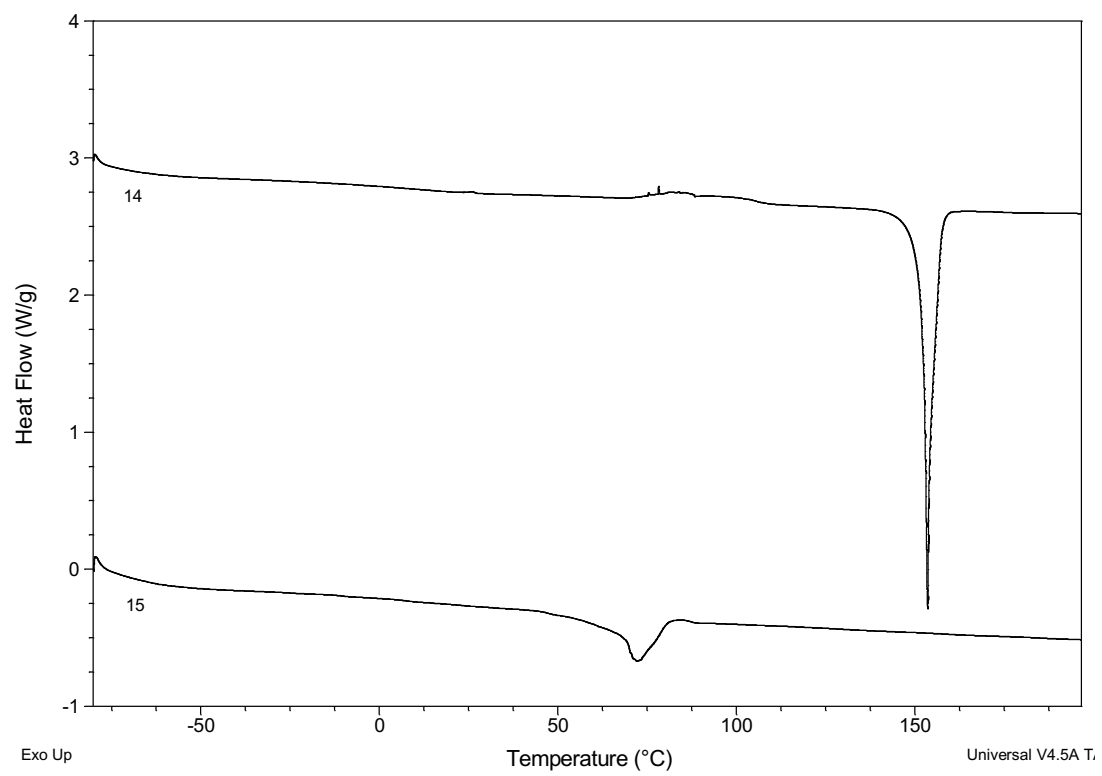

Figure S6: Representative DSC scans for compounds **14** and **15**.

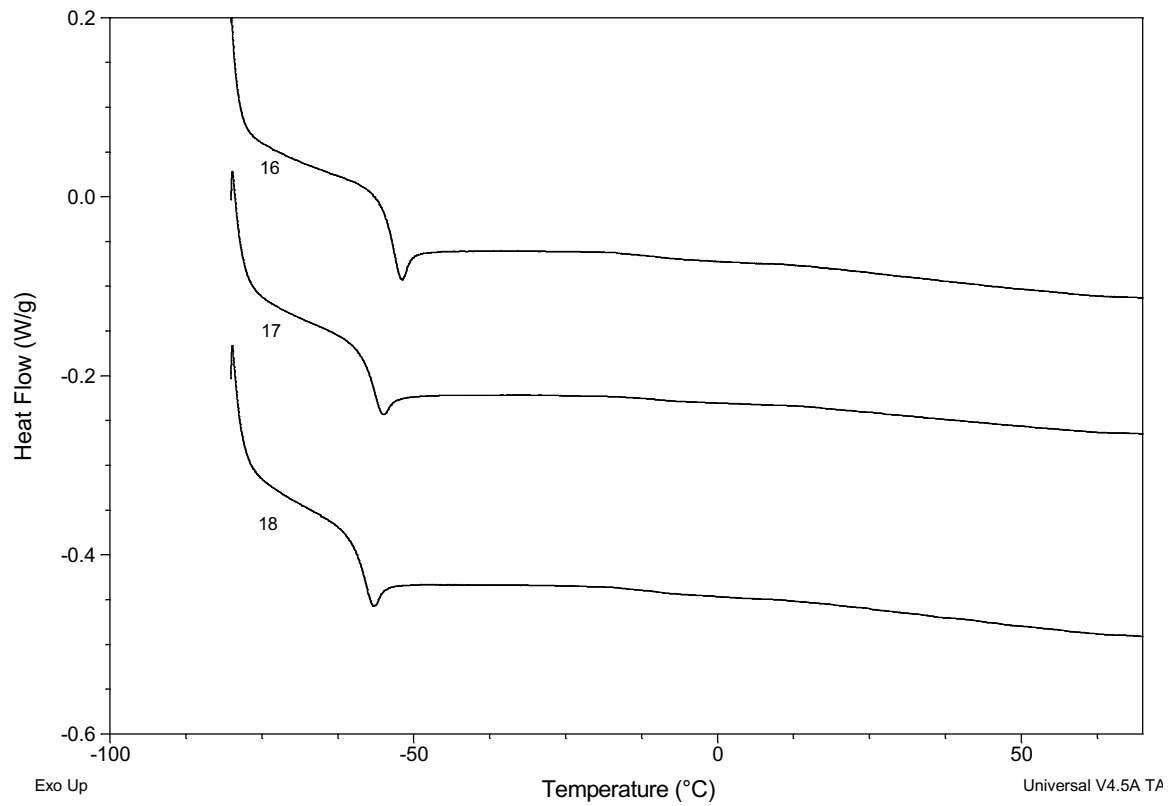

Figure S7: Representative DSC scans for compounds **16-18**, and **13**, which exhibit weak glass transitions.

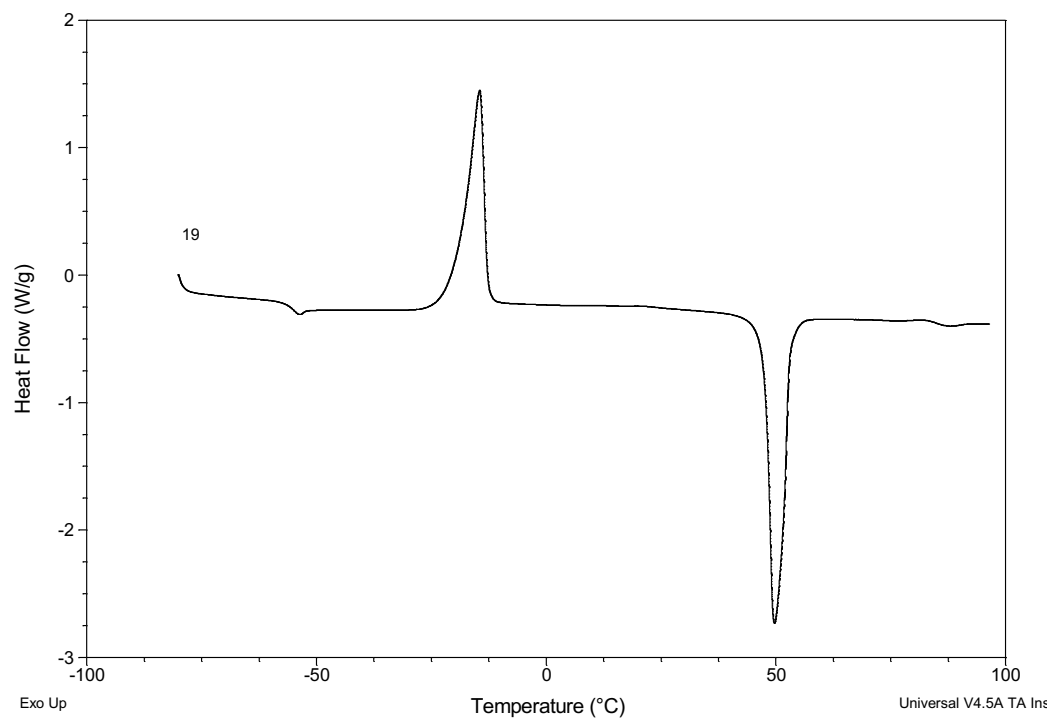

Figure S8: Representative DSC scan for compound **19**.

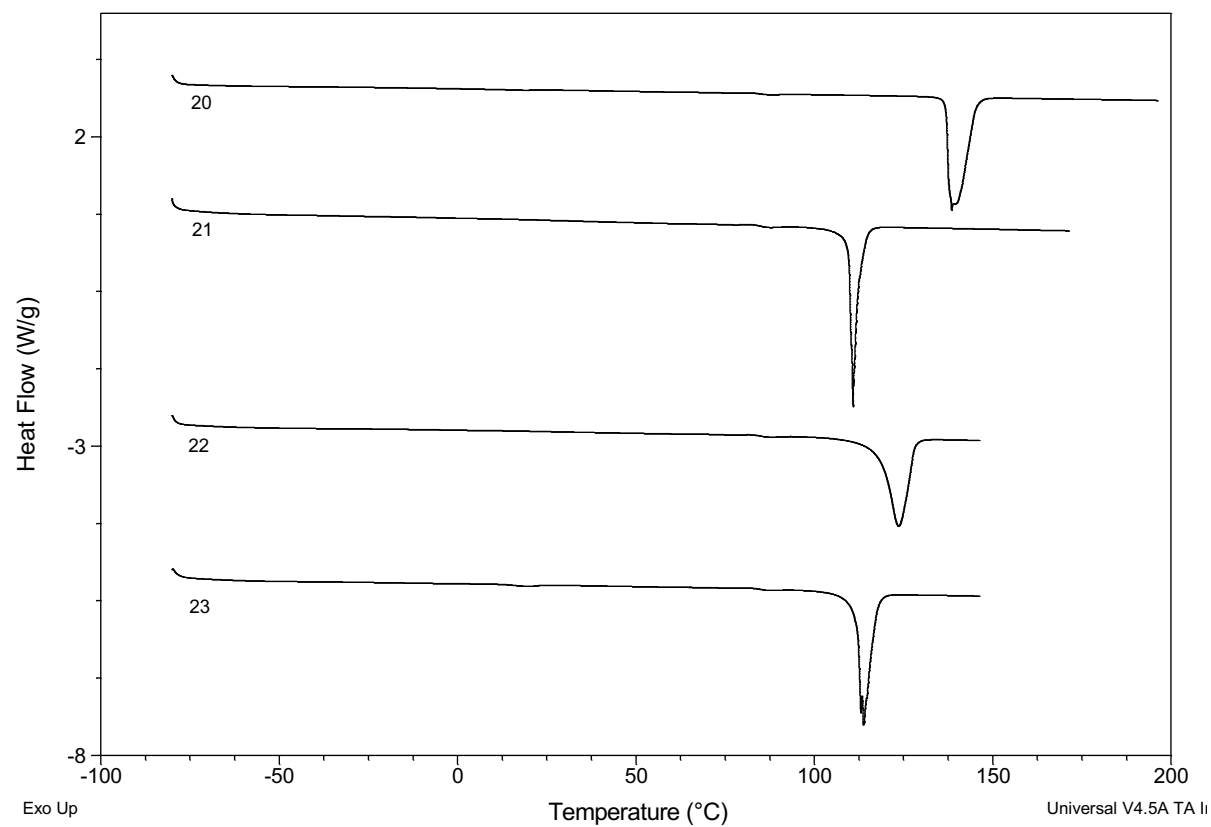

Figure S9: Representative DSC scans for compounds **20-23**.

## **Details of the Single Crystal X-Ray Diffraction Data Collection**

### CRYSTAL GROWTH:

Crystals of the salts were grown by slow evaporation from solutions in methanol. The crystals were collected by decantation, dried in vacuo, and transferred into a glass vial for storage.

### SAMPLE PREPARATION:

Single crystals were taken out of the vial by either spatula (for dry samples) or via pasteur pipette (for crystals in mother liquor) and immersed in a few drops of Fomblin oil (a perfluoroether). Crystals were separated from each other with a MiTeGen micromesh mount (on a magnetic snap on mount), cut to size when required using triangular tipped a carpet cutting razor blade, and picked up on a MiTeGen micromesh mount from the Fomblin oil (using as little oil as possible). The MiTeGen micromesh mount on the magnetic snap on mount was transferred into the cold stream of the diffractometer and flash cooled.

|                    |                                                                                              |
|--------------------|----------------------------------------------------------------------------------------------|
| INSTRUMENTATION:   | Bruker AXS D8 Quest CMOS diffractometer                                                      |
| RADIATION:         | Triumph curved graphite crystal                                                              |
| SOFTWARE PACKAGES: | Apex3 v2018.1-0 (Bruker, 2018)<br>SAINT V8.38A (Bruker, 2016)<br>SHELXS-97 (Sheldrick, 2008) |
| DATA COLLECTION:   | omega and phi scans                                                                          |

## **Software and Refinement Methods**

|                     |                                |
|---------------------|--------------------------------|
| DATA COLLECTION:    | Apex3 v2018.1-0 (Bruker, 2018) |
| CELL REFINEMENT:    | SAINT V8.38A (Bruker, 2016)    |
| DATA REDUCTION:     | SAINT V8.38A (Bruker, 2016)    |
| STRUCTURE SOLUTION: | SHELXS-97 (Sheldrick, 2008)    |

## **Special Details of Restraints and Methods**

### **Cation 5, P(Ph)<sub>3</sub>-p-POP<sup>+</sup>**

\_reflns\_special\_details

;

Reflections were merged by SHELXL according to the crystal class for the calculation of statistics and refinement.

\_reflns\_Friedel\_fraction is defined as the number of unique Friedel pairs measured divided by the number that would be possible theoretically, ignoring centric projections and systematic absences. Completeness statistics refer to single and composite reflections containing twin component 1 only.

;

|                            |                                  |
|----------------------------|----------------------------------|
| _computing_data_collection | 'Apex3 v2018.7-2 (Bruker, 2017)' |
| _computing_cell_refinement | 'SAINT V8.38A (Bruker, 2016)'    |



```

_computing_data_reduction      'SAINT V8.38A (Bruker, 2016)'
_computing_structure_solution  'SHELXS-97 (Sheldrick, 2008)'
_computing_structure_refinement
;
SHELXL-2018/3 (Sheldrick, 2015, 2018),
SHELXLE Rev946 (H\ubschle et al., 2011)
;
_computing_molecular_graphics  ?
_computing_publication_material ?
_refine_special_details
;
Refined as a 2-component inversion twin.

```

The anion is disordered by a pseudo-mirror operation. The two disordered moieties were restrained to have similar geometries. Uij components of ADPs for disordered atoms closer to each other than 2.0 Angstrom were restrained to be similar. Subject to these conditions the occupancy ratio refined to 0.783(3) to 0.217(3).

### **Cation 6, P(Ph)<sub>3</sub>-p-(o-F-POP)<sup>+</sup>**

```

_reflns_special_details
;
Reflections were merged by SHELXL according to the crystal class for the calculation of
statistics and refinement.

```

\_reflns\_Friedel\_fraction is defined as the number of unique Friedel pairs measured divided by the number that would be possible theoretically, ignoring centric projections and systematic absences.

```

;
_computing_data_collection      'Apex3 v2018.1-0 (Bruker, 2018)'
_computing_cell_refinement      'SAINT V8.38A (Bruker, 2016)'
_computing_data_reduction       'SAINT V8.38A (Bruker, 2016)'
_computing_structure_solution   'SHELXS-97 (Sheldrick, 2008)'
_computing_structure_refinement
;
SHELXL-2018/3 (Sheldrick, 2015, 2018),
SHELXLE Rev946 (H\ubschle et al., 2011)
;
_computing_molecular_graphics  ?
_computing_publication_material ?
_refine_special_details
;

```

The fluorine atom of the fluorophenyl group is disordered over the two ortho positions. The occupancy ratio refined to 0.683(4) to 0.683(4). The anion is disordered over two orientations, with indication of additional disorder which was not sufficiently defined for unambiguous refinement. The two disordered moieties were restrained to have similar geometries. Uij components of ADPs for disordered atoms closer to each other than 2.0 Angstrom were restrained to be similar. Subject to these conditions the occupancy ratio refined to 0.8456(13) to 0.1544(13).

**NOTE:** The refined structure for this compound had a B-level alert for an O-O contact between the cations. This is due to the dipole-dipole interaction between the C-O bonds of neighboring cations, which overcomes the expected O-O repulsion and the alert regarded as a false alarm.

**Cation 7, P(Ph)<sub>3</sub>-p-(m-F-POP)<sup>+</sup>**

```
_reflns_special_details
;
_reflns_Friedel_fraction is defined as the number of unique Friedel pairs measured divided by
the number that would be possible theoretically, ignoring centric projections and systematic
absences. Completeness statistics refer to single and composite reflections containing twin
component 1 only.
;

_computing_data_collection      'Apex3 v2018.1-0 (Bruker, 2018)'
_computing_cell_refinement      'SAINT V8.38A (Bruker, 2016)'
_computing_data_reduction       'SAINT V8.38A (Bruker, 2016)'
_computing_structure_solution   'SHELXS-97 (Sheldrick, 2008)'
_computing_structure_refinement
;
SHELXL-2018/3 (Sheldrick, 2015, 2018),
SHELXLE Rev946 (Hübschle et al., 2011)
;
_computing_molecular_graphics   ?
_computing_publication_material ?
_refine_special_details
;
The crystal under investigation was found to be non-merohedrally twinned. The orientation
matrices for the two components were identified using the program Cell_Now, with the two
components being related by a 180 degree rotation around the real a-axis. The two
components were integrated using Saint and corrected for absorption using twinabs, resulting
in the following statistics:

15502 data (4686 unique) involve domain 1 only, mean I/sigma 23.1
15148 data (4609 unique) involve domain 2 only, mean I/sigma 11.5
75199 data (19329 unique) involve 2 domains, mean I/sigma 14.4
  19 data (19 unique) involve 3 domains, mean I/sigma 11.7
```

The exact twin matrix identified by the integration program was found to be:

```
1.00019 0.00032 0.00040
-0.00035 -1.00000 0.00029
-0.92160 -0.00042 -1.00019
```

The structure was solved using direct methods with only the non-overlapping reflections of component 1. The structure was refined using the hklf 5 routine with all reflections of component 1 (including the overlapping ones), resulting in a BASF value of 0.1967(6).

The Rint value given is for all reflections and is based on agreement between observed single and composite intensities and those calculated from refined unique intensities and twin fractions (TWINABS (Sheldrick, 2012)).

In both cations, the fluorine atom of the fluorophenyl group is disordered over the two meta positions. The C-F distances in the cations were restrained to be similar. Subject to these conditions the occupancy ratio refined to 0.835(6) to 0.165(6) in the cation of P1, and to 0.833(5) to 0.167(5) in the cation of P2.

Two anions are located on inversion centers and are disordered around these. Of these, one is in addition disordered over two alternative positions not related by inversion. The three disordered moieties were restrained to have similar geometries as the one not disordered anion in a general position. Uij components of ADPs for disordered atoms closer to each other than 2.0 Angstrom were restrained to be similar. Subject to these conditions the occupancy rates for the molecule of N3 and N3B refined to two times 0.3200(12) and two times 0.1800(12).

;

#### **Cation 4, P(Ph)<sub>3</sub>-p-F-POP<sup>+</sup>**

\_reflns\_special\_details

;

Reflections were merged by SHELXL according to the crystal class for the calculation of statistics and refinement.

\_reflns\_Friedel\_fraction is defined as the number of unique Friedel pairs measured divided by the number that would be possible theoretically, ignoring centric projections and systematic absences.

;

\_computing\_data\_collection 'Apex3 v2018.1-0 (Bruker, 2018)'

\_computing\_cell\_refinement 'SAINT V8.38A (Bruker, 2016)'

\_computing\_data\_reduction 'SAINT V8.38A (Bruker, 2016)'

\_computing\_structure\_solution 'SHELXS-97 (Sheldrick, 2008)'

\_computing\_structure\_refinement

;

SHELXL-2018/3 (Sheldrick, 2015, 2018),

SHELXLE Rev946 (H<sup>2</sup>ubschle et al., 2011)

;

\_computing\_molecular\_graphics ?

\_computing\_publication\_material ?

\_refine\_special\_details

;

In both p-F-Ph-PPh<sub>3</sub> cations the fluorine atom is disordered over all four possible para positions. All C-F bond lengths in the cations were restrained to be similar. The total occupancy was each constrained to one fluorine. Subject to these conditions the occupancy rates for the F atoms refined to 0.493(3), 0.080(3), 0.175(3) and 0.251(3) for the cation of P1, and to 0.497(3), 0.079(3), 0.248(3) and 0.176(3) for the cation of P2.

The two anions are disordered over each two orientations. The four disordered moieties were restrained to have similar geometries. Uij components of ADPs for disordered atoms closer to each other than 2.0 Angstrom were restrained to be similar. Subject to these conditions the occupancy ratio refined to 0.9503(12) to 0.0497(12) for the molecule of N1, and to 0.8698(16) to 0.1302(16) for the molecule of N2.

;
